# Supplementary material
Source: publisher figshare collection journal article supplement (https://frontiersin.figshare.com/ndownloader/files/24979811)
Supplement: Supplementary file 1 [file 24979811]

Archive with 17 entries (12 files):
- datasheet/
- datasheet/affect of wring scheme/
- datasheet/affect of wring scheme/A.csv
- datasheet/affect of wring scheme/B.csv
- datasheet/affect of wring scheme/C.csv
- datasheet/affect of wring scheme/D.csv
- datasheet/azimuth plane/
- datasheet/azimuth plane/-10.csv
- datasheet/azimuth plane/0.csv
- datasheet/azimuth plane/10.csv
- datasheet/elevation plane/
- datasheet/elevation plane/-10.csv
- datasheet/elevation plane/0.csv
- datasheet/elevation plane/10.csv
- datasheet/simulation of phaseshifter/
- datasheet/simulation of phaseshifter/amplitude.csv
- datasheet/simulation of phaseshifter/phase.csv
