# Supplementary material
Source: publisher figshare collection journal article supplement (https://frontiersin.figshare.com/ndownloader/files/24979811)
Supplement: Supplementary file 1 [file 24979811 › datasheet/affect of wring scheme/A.csv]

Frequency / GHz SZmax(1)	Zmax(1) (a=2.69)/arg	degrees
----------------------------------------------------------------------
90 97.555485
90.05 97.45422
90.1 97.352699
90.15 97.250922
90.2 97.148886
90.25 97.04659
90.3 96.944032
90.35 96.841211
90.4 96.738125
90.45 96.634773
90.5 96.531153
90.55 96.427264
90.6 96.323102
90.65 96.218668
90.7 96.113959
90.75 96.008974
90.8 95.90371
90.85 95.798166
90.9 95.692341
90.95 95.586232
91 95.479838
91.05 95.373156
91.1 95.266185
91.15 95.158924
91.2 95.05137
91.25 94.943521
91.3 94.835376
91.35 94.726932
91.4 94.618188
91.45 94.509141
91.5 94.39979
91.55 94.290133
91.6 94.180167
91.65 94.069891
91.7 93.959302
91.75 93.848398
91.8 93.737178
91.85 93.625639
91.9 93.513779
91.95 93.401595
92 93.289087
92.05 93.17625
92.1 93.063084
92.15 92.949586
92.2 92.835753
92.25 92.721583
92.3 92.607074
92.35 92.492224
92.4 92.37703
92.45 92.26149
92.5 92.145601
92.55 92.029361
92.6 91.912767
92.65 91.795818
92.7 91.678509
92.75 91.560839
92.8 91.442805
92.85 91.324405
92.9 91.205636
92.95 91.086495
93 90.966979
93.05 90.847086
93.1 90.726813
93.15 90.606157
93.2 90.485116
93.25 90.363686
93.3 90.241864
93.35 90.119648
93.4 89.997035
93.45 89.874022
93.5 89.750605
93.55 89.626782
93.6 89.502549
93.65 89.377904
93.7 89.252843
93.75 89.127362
93.8 89.00146
93.85 88.875132
93.9 88.748376
93.95 88.621187
94 88.493563
94.05 88.3655
94.1 88.236994
94.15 88.108043
94.2 87.978642
94.25 87.848788
94.3 87.718478
94.35 87.587707
94.4 87.456471
94.45 87.324769
94.5 87.192594
94.55 87.059944
94.6 86.926815
94.65 86.793202
94.7 86.659102
94.75 86.524511
94.8 86.389424
94.85 86.253838
94.9 86.117748
94.95 85.98115
95 85.84404
95.05 85.706413
95.1 85.568265
95.15 85.429591
95.2 85.290388
95.25 85.15065
95.3 85.010373
95.35 84.869552
95.4 84.728182
95.45 84.58626
95.5 84.443778
95.55 84.300734
95.6 84.157122
95.65 84.012936
95.7 83.868172
95.75 83.722825
95.8 83.576889
95.85 83.430359
95.9 83.283229
95.95 83.135495
96 82.98715
96.05 82.838189
96.1 82.688606
96.15 82.538396
96.2 82.387553
96.25 82.236071
96.3 82.083943
96.35 81.931165
96.4 81.777729
96.45 81.623629
96.5 81.46886
96.55 81.313414
96.6 81.157285
96.65 81.000467
96.7 80.842953
96.75 80.684736
96.8 80.52581
96.85 80.366167
96.9 80.2058
96.95 80.044702
97 79.882867
97.05 79.720285
97.1 79.556951
97.15 79.392857
97.2 79.227994
97.25 79.062356
97.3 78.895933
97.35 78.728719
97.4 78.560705
97.45 78.391882
97.5 78.222243
97.55 78.051779
97.6 77.880481
97.65 77.70834
97.7 77.535348
97.75 77.361496
97.8 77.186774
97.85 77.011173
97.9 76.834684
97.95 76.657297
98 76.479002
98.05 76.29979
98.1 76.11965
98.15 75.938572
98.2 75.756546
98.25 75.573562
98.3 75.389608
98.35 75.204674
98.4 75.018749
98.45 74.831821
98.5 74.64388
98.55 74.454913
98.6 74.264909
98.65 74.073856
98.7 73.881742
98.75 73.688554
98.8 73.494279
98.85 73.298906
98.9 73.102421
98.95 72.904811
99 72.706063
99.05 72.506162
99.1 72.305095
99.15 72.102848
99.2 71.899406
99.25 71.694755
99.3 71.48888
99.35 71.281766
99.4 71.073397
99.45 70.863758
99.5 70.652833
99.55 70.440605
99.6 70.227057
99.65 70.012174
99.7 69.795938
99.75 69.578331
99.8 69.359335
99.85 69.138933
99.9 68.917106
99.95 68.693835
100 68.469101
100.05 68.242883
100.1 68.015163
100.15 67.78592
100.2 67.555133
100.25 67.322781
100.3 67.088842
100.35 66.853295
100.4 66.616116
100.45 66.377283
100.5 66.136772
100.55 65.894559
100.6 65.650621
100.65 65.40493
100.7 65.157464
100.75 64.908194
100.8 64.657095
100.85 64.404138
100.9 64.149297
100.95 63.892543
101 63.633846
101.05 63.373176
101.1 63.110503
101.15 62.845795
101.2 62.57902
101.25 62.310146
101.3 62.039138
101.35 61.765962
101.4 61.490582
101.45 61.212961
101.5 60.933064
101.55 60.65085
101.6 60.366281
101.65 60.079317
101.7 59.789916
101.75 59.498036
101.8 59.203634
101.85 58.906665
101.9 58.607084
101.95 58.304845
102 57.999903
102.05 57.692208
102.1 57.381715
102.15 57.068376
102.2 56.752145
102.25 56.432978
102.3 56.110832
102.35 55.785671
102.4 55.457462
102.45 55.126184
102.5 54.791827
102.55 54.454399
102.6 54.113933
102.65 53.770495
102.7 53.424199
102.75 53.075216
102.8 52.723803
102.85 52.370319
102.9 52.015257
102.95 51.659273
103 51.303207
103.05 50.94808
103.1 50.59506
103.15 50.245336
103.2 49.899899
103.25 49.559194
103.3 49.222725
103.35 48.888731
103.4 48.554165
103.45 48.215123
103.5 47.86763
103.55 47.50849
103.6 47.135831
103.65 46.749163
103.7 46.349076
103.75 45.936786
103.8 45.513727
103.85 45.081277
103.9 44.640615
103.95 44.192672
104 43.738143
104.05 43.277516
104.1 42.811115
104.15 42.339137
104.2 41.861682
104.25 41.378779
104.3 40.890403
104.35 40.396494
104.4 39.896963
104.45 39.3917
104.5 38.88058
104.55 38.363468
104.6 37.84022
104.65 37.310685
104.7 36.774706
104.75 36.232123
104.8 35.682771
104.85 35.12648
104.9 34.563079
104.95 33.992391
105 33.414236
105.05 32.828431
105.1 32.234789
105.15 31.633117
105.2 31.023221
105.25 30.404899
105.3 29.777948
105.35 29.142157
105.4 28.497312
105.45 27.843193
105.5 27.179573
105.55 26.506221
105.6 25.822899
105.65 25.129364
105.7 24.425364
105.75 23.710641
105.8 22.984932
105.85 22.247963
105.9 21.499455
105.95 20.739118
106 19.966657
106.05 19.181767
106.1 18.384132
106.15 17.573428
106.2 16.749323
106.25 15.911471
106.3 15.05952
106.35 14.193102
106.4 13.311842
106.45 12.41535
106.5 11.503226
106.55 10.575056
106.6 9.6304134
106.65 8.6688567
106.7 7.6899313
106.75 6.6931672
106.8 5.6780792
106.85 4.644166
106.9 3.5909098
106.95 2.5177754
107 1.42421
107.05 0.30964198
107.1 -0.8265193
107.15 -1.9848844
107.2 -3.1660846
107.25 -4.3707724
107.3 -5.5996221
107.35 -6.8533312
107.4 -8.1326201
107.45 -9.4382335
107.5 -10.770941
107.55 -12.131537
107.6 -13.520842
107.65 -14.939702
107.7 -16.38899
107.75 -17.869607
107.8 -19.382478
107.85 -20.928556
107.9 -22.50882
107.95 -24.124272
108 -25.775939
108.05 -27.464871
108.1 -29.192135
108.15 -30.958818
108.2 -32.766016
108.25 -34.614837
108.3 -36.506389
108.35 -38.441777
108.4 -40.422094
108.45 -42.448412
108.5 -44.521767
108.55 -46.643151
108.6 -48.813497
108.65 -51.033656
108.7 -53.304387
108.75 -55.626326
108.8 -57.999971
108.85 -60.425652
108.9 -62.903507
108.95 -65.43345
109 -68.015145
109.05 -70.647973
109.1 -73.331008
109.15 -76.062986
109.2 -78.84228
109.25 -81.666884
109.3 -84.534394
109.35 -87.442001
109.4 -90.386491
109.45 -93.364257
109.5 -96.371313
109.55 -99.403328
109.6 -102.45566
109.65 -105.52342
109.7 -108.6015
109.75 -111.68469
109.8 -114.76767
109.85 -117.84516
109.9 -120.91196
109.95 -123.96301
110 -126.99344
110.05 -129.9987
110.1 -132.97451
110.15 -135.91697
110.2 -138.82256
110.25 -141.68816
110.3 -144.51107
110.35 -147.28898
110.4 -150.01999
110.45 -152.70259
110.5 -155.33563
110.55 -157.91828
110.6 -160.45003
110.65 -162.93066
110.7 -165.36019
110.75 -167.73887
110.8 -170.06712
110.85 -172.34554
110.9 -174.57487
110.95 -176.75597
111 -178.88978
111.05 -180.97732
111.1 -183.01968
111.15 -185.01798
111.2 -186.97338
111.25 -188.88705
111.3 -190.76018
111.35 -192.59396
111.4 -194.38956
111.45 -196.14817
111.5 -197.87093
111.55 -199.55898
111.6 -201.21344
111.65 -202.83541
111.7 -204.42595
111.75 -205.98609
111.8 -207.51685
111.85 -209.01922
111.9 -210.49416
111.95 -211.94258
112 -213.36539
112.05 -214.76345
112.1 -216.13763
112.15 -217.48873
112.2 -218.81755
112.25 -220.12485
112.3 -221.41138
112.35 -222.67786
112.4 -223.92499
112.45 -225.15344
112.5 -226.36386
112.55 -227.5569
112.6 -228.73316
112.65 -229.89324
112.7 -231.03771
112.75 -232.16715
112.8 -233.28209
112.85 -234.38306
112.9 -235.47058
112.95 -236.54514
113 -237.60723
113.05 -238.65732
113.1 -239.69587
113.15 -240.72333
113.2 -241.74012
113.25 -242.74669
113.3 -243.74343
113.35 -244.73076
113.4 -245.70906
113.45 -246.67873
113.5 -247.64014
113.55 -248.59366
113.6 -249.53966
113.65 -250.47847
113.7 -251.41046
113.75 -252.33595
113.8 -253.25529
113.85 -254.16881
113.9 -255.07681
113.95 -255.97963
114 -256.87757
114.05 -257.77095
114.1 -258.66005
114.15 -259.5452
114.2 -260.42667
114.25 -261.30476
114.3 -262.17976
114.35 -263.05196
114.4 -263.92164
114.45 -264.78909
114.5 -265.65458
114.55 -266.51838
114.6 -267.38079
114.65 -268.24206
114.7 -269.10249
114.75 -269.96233
114.8 -270.82186
114.85 -271.68136
114.9 -272.5411
114.95 -273.40134
115 -274.26237
115.05 -275.12446
115.1 -275.98788
115.15 -276.85292
115.2 -277.71984
115.25 -278.58893
115.3 -279.46046
115.35 -280.33474
115.4 -281.21203
115.45 -282.09264
115.5 -282.97685
115.55 -283.86496
115.6 -284.75727
115.65 -285.65408
115.7 -286.55571
115.75 -287.46246
115.8 -288.37466
115.85 -289.29262
115.9 -290.21668
115.95 -291.14717
116 -292.08443
116.05 -293.02881
116.1 -293.98066
116.15 -294.94035
116.2 -295.90825
116.25 -296.88473
116.3 -297.87019
116.35 -298.86501
116.4 -299.86961
116.45 -300.8844
116.5 -301.90981
116.55 -302.94628
116.6 -303.99425
116.65 -305.0542
116.7 -306.12659
116.75 -307.21192
116.8 -308.31069
116.85 -309.42342
116.9 -310.55065
116.95 -311.69292
117 -312.85081
117.05 -314.0249
117.1 -315.21581
117.15 -316.42416
117.2 -317.65061
117.25 -318.89581
117.3 -320.16048
117.35 -321.44533
117.4 -322.7511
117.45 -324.07859
117.5 -325.42857
117.55 -326.8019
117.6 -328.19944
117.65 -329.62209
117.7 -331.07078
117.75 -332.54648
117.8 -334.05021
117.85 -335.58302
117.9 -337.14599
117.95 -338.74026
118 -340.36702
118.05 -342.02748
118.1 -343.72292
118.15 -345.45467
118.2 -347.22409
118.25 -349.0326
118.3 -350.88167
118.35 -352.77281
118.4 -354.70759
118.45 -356.6876
118.5 -358.71449
118.55 -360.78993
118.6 -362.91561
118.65 -365.09323
118.7 -367.32451
118.75 -369.61113
118.8 -371.95475
118.85 -374.35696
118.9 -376.81927
118.95 -379.34306
119 -381.92956
119.05 -384.5798
119.1 -387.29455
119.15 -390.0743
119.2 -392.91917
119.25 -395.82886
119.3 -398.80261
119.35 -401.8391
119.4 -404.93644
119.45 -408.09209
119.5 -411.30285
119.55 -414.56478
119.6 -417.87326
119.65 -421.22296
119.7 -424.6079
119.75 -428.02149
119.8 -431.45662
119.85 -434.90578
119.9 -438.36117
119.95 -441.81484
120 -445.25884
120.05 -448.68538
120.1 -452.08692
120.15 -455.45635
120.2 -458.78706
120.25 -462.07307
120.3 -465.30902
120.35 -468.49027
120.4 -471.61291
120.45 -474.67372
120.5 -477.67016
120.55 -480.60035
120.6 -483.463
120.65 -486.25735
120.7 -488.98316
120.75 -491.64056
120.8 -494.23008
120.85 -496.75254
120.9 -499.20901
120.95 -501.60076
121 -503.92924
121.05 -506.19601
121.1 -508.4027
121.15 -510.55102
121.2 -512.64272
121.25 -514.67955
121.3 -516.66327
121.35 -518.59562
121.4 -520.47832
121.45 -522.31304
121.5 -524.10143
121.55 -525.8451
121.6 -527.54558
121.65 -529.20437
121.7 -530.82293
121.75 -532.40265
121.8 -533.94487
121.85 -535.45088
121.9 -536.92192
121.95 -538.35919
122 -539.76382
122.05 -541.13692
122.1 -542.47953
122.15 -543.79266
122.2 -545.07728
122.25 -546.33432
122.3 -547.56467
122.35 -548.76918
122.4 -549.94867
122.45 -551.10393
122.5 -552.2357
122.55 -553.34472
122.6 -554.43168
122.65 -555.49725
122.7 -556.54207
122.75 -557.56677
122.8 -558.57193
122.85 -559.55812
122.9 -560.52591
122.95 -561.47582
123 -562.40836
123.05 -563.32402
123.1 -564.22329
123.15 -565.10662
123.2 -565.97445
123.25 -566.82721
123.3 -567.66532
123.35 -568.48917
123.4 -569.29915
123.45 -570.09564
123.5 -570.87899
123.55 -571.64956
123.6 -572.40767
123.65 -573.15367
123.7 -573.88787
123.75 -574.61058
123.8 -575.32208
123.85 -576.02269
123.9 -576.71266
123.95 -577.39228
124 -578.06182
124.05 -578.72152
124.1 -579.37163
124.15 -580.0124
124.2 -580.64406
124.25 -581.26684
124.3 -581.88096
124.35 -582.48663
124.4 -583.08406
124.45 -583.67346
124.5 -584.25502
124.55 -584.82893
124.6 -585.39538
124.65 -585.95455
124.7 -586.50661
124.75 -587.05173
124.8 -587.59008
124.85 -588.12182
124.9 -588.64711
124.95 -589.16609
125 -589.67891
125.05 -590.18572
125.1 -590.68666
125.15 -591.18185
125.2 -591.67144
125.25 -592.15554
125.3 -592.63428
125.35 -593.10778
125.4 -593.57615
125.45 -594.03951
125.5 -594.49798
125.55 -594.95164
125.6 -595.40062
125.65 -595.845
125.7 -596.28488
125.75 -596.72037
125.8 -597.15155
125.85 -597.57851
125.9 -598.00133
125.95 -598.42011
126 -598.83492
126.05 -599.24585
126.1 -599.65296
126.15 -600.05634
126.2 -600.45606
126.25 -600.85219
126.3 -601.24479
126.35 -601.63395
126.4 -602.01971
126.45 -602.40215
126.5 -602.78132
126.55 -603.1573
126.6 -603.53012
126.65 -603.89987
126.7 -604.26658
126.75 -604.63031
126.8 -604.99112
126.85 -605.34905
126.9 -605.70417
126.95 -606.05651
127 -606.40613
127.05 -606.75307
127.1 -607.09738
127.15 -607.4391
127.2 -607.77827
127.25 -608.11495
127.3 -608.44916
127.35 -608.78096
127.4 -609.11037
127.45 -609.43745
127.5 -609.76222
127.55 -610.08472
127.6 -610.405
127.65 -610.72308
127.7 -611.03901
127.75 -611.35281
127.8 -611.66452
127.85 -611.97416
127.9 -612.28179
127.95 -612.58741
128 -612.89107
128.05 -613.1928
128.1 -613.49262
128.15 -613.79056
128.2 -614.08666
128.25 -614.38094
128.3 -614.67342
128.35 -614.96414
128.4 -615.25311
128.45 -615.54037
128.5 -615.82595
128.55 -616.10985
128.6 -616.39212
128.65 -616.67277
128.7 -616.95183
128.75 -617.22932
128.8 -617.50526
128.85 -617.77967
128.9 -618.05258
128.95 -618.32401
129 -618.59398
129.05 -618.8625
129.1 -619.12961
129.15 -619.39531
129.2 -619.65963
129.25 -619.92259
129.3 -620.18421
129.35 -620.4445
129.4 -620.70349
129.45 -620.96119
129.5 -621.21761
129.55 -621.47278
129.6 -621.72672
129.65 -621.97943
129.7 -622.23095
129.75 -622.48127
129.8 -622.73042
129.85 -622.97842
129.9 -623.22527
129.95 -623.471
130 -623.71562
130.05 -623.95914
130.1 -624.20158
130.15 -624.44296
130.2 -624.68328
130.25 -624.92256
130.3 -625.16081
130.35 -625.39805
130.4 -625.63429
130.45 -625.86955
130.5 -626.10382
130.55 -626.33714
130.6 -626.56951
130.65 -626.80094
130.7 -627.03144
130.75 -627.26103
130.8 -627.48971
130.85 -627.71751
130.9 -627.94442
130.95 -628.17047
131 -628.39566
131.05 -628.61999
131.1 -628.8435
131.15 -629.06617
131.2 -629.28803
131.25 -629.50908
131.3 -629.72934
131.35 -629.9488
131.4 -630.16749
131.45 -630.38542
131.5 -630.60258
131.55 -630.819
131.6 -631.03467
131.65 -631.24961
131.7 -631.46383
131.75 -631.67734
131.8 -631.89014
131.85 -632.10224
131.9 -632.31366
131.95 -632.52439
132 -632.73445
132.05 -632.94385
132.1 -633.15259
132.15 -633.36068
132.2 -633.56812
132.25 -633.77494
132.3 -633.98113
132.35 -634.1867
132.4 -634.39165
132.45 -634.596
132.5 -634.79976
132.55 -635.00292
132.6 -635.2055
132.65 -635.4075
132.7 -635.60893
132.75 -635.80979
132.8 -636.0101
132.85 -636.20986
132.9 -636.40907
132.95 -636.60774
133 -636.80587
133.05 -637.00348
133.1 -637.20057
133.15 -637.39715
133.2 -637.59321
133.25 -637.78877
133.3 -637.98383
133.35 -638.1784
133.4 -638.37248
133.45 -638.56609
133.5 -638.75921
133.55 -638.95186
133.6 -639.14405
133.65 -639.33578
133.7 -639.52705
133.75 -639.71787
133.8 -639.90824
133.85 -640.09818
133.9 -640.28768
133.95 -640.47674
134 -640.66538
134.05 -640.8536
134.1 -641.0414
134.15 -641.22879
134.2 -641.41577
134.25 -641.60235
134.3 -641.78852
134.35 -641.9743
134.4 -642.1597
134.45 -642.3447
134.5 -642.52932
134.55 -642.71357
134.6 -642.89744
134.65 -643.08094
134.7 -643.26407
134.75 -643.44684
134.8 -643.62926
134.85 -643.81131
134.9 -643.99302
134.95 -644.17439
135 -644.35541
135.05 -644.53609
135.1 -644.71644
135.15 -644.89645
135.2 -645.07614
135.25 -645.25551
135.3 -645.43456
135.35 -645.6133
135.4 -645.79172
135.45 -645.96985
135.5 -646.14767
135.55 -646.32521
135.6 -646.50246
135.65 -646.67944
135.7 -646.85616
135.75 -647.03264
135.8 -647.20887
135.85 -647.38473
135.9 -647.55956
135.95 -647.73213
136 -647.90528
136.05 -648.08004
136.1 -648.2548
136.15 -648.4292
136.2 -648.60322
136.25 -648.7769
136.3 -648.95026
136.35 -649.12333
136.4 -649.29612
136.45 -649.46864
136.5 -649.64089
136.55 -649.81288
136.6 -649.98461
136.65 -650.1561
136.7 -650.32733
136.75 -650.49833
136.8 -650.66908
136.85 -650.83959
136.9 -651.00987
136.95 -651.17992
137 -651.34974
137.05 -651.51933
137.1 -651.6887
137.15 -651.85784
137.2 -652.02676
137.25 -652.19547
137.3 -652.36396
137.35 -652.53224
137.4 -652.70031
137.45 -652.86817
137.5 -653.03582
137.55 -653.20327
137.6 -653.37052
137.65 -653.53756
137.7 -653.70441
137.75 -653.87106
137.8 -654.03752
137.85 -654.20379
137.9 -654.36986
137.95 -654.53575
138 -654.70145
138.05 -654.86696
138.1 -655.0323
138.15 -655.19745
138.2 -655.36242
138.25 -655.52722
138.3 -655.69183
138.35 -655.85628
138.4 -656.02055
138.45 -656.18466
138.5 -656.34859
138.55 -656.51236
138.6 -656.67596
138.65 -656.8394
138.7 -657.00267
138.75 -657.16579
138.8 -657.32874
138.85 -657.49154
138.9 -657.65418
138.95 -657.81667
139 -657.97901
139.05 -658.14119
139.1 -658.30322
139.15 -658.46511
139.2 -658.62685
139.25 -658.78844
139.3 -658.94989
139.35 -659.1112
139.4 -659.27236
139.45 -659.43339
139.5 -659.59428
139.55 -659.75503
139.6 -659.91564
139.65 -660.07612
139.7 -660.23647
139.75 -660.39668
139.8 -660.55677
139.85 -660.71672
139.9 -660.87655
139.95 -661.03625
140 -661.19583
Frequency / GHz SZmax(1)	Zmax(1) (a=3.1)/arg	degrees
----------------------------------------------------------------------
90 94.885728
90.05 94.764751
90.1 94.643289
90.15 94.521339
90.2 94.398902
90.25 94.275975
90.3 94.152558
90.35 94.028649
90.4 93.904248
90.45 93.779353
90.5 93.653963
90.55 93.528078
90.6 93.401695
90.65 93.274815
90.7 93.147436
90.75 93.019557
90.8 92.891177
90.85 92.762294
90.9 92.632908
90.95 92.503016
91 92.372618
91.05 92.241712
91.1 92.110296
91.15 91.97837
91.2 91.84593
91.25 91.712975
91.3 91.579503
91.35 91.445512
91.4 91.311
91.45 91.175965
91.5 91.040402
91.55 90.904311
91.6 90.767688
91.65 90.630531
91.7 90.492835
91.75 90.354599
91.8 90.215817
91.85 90.076488
91.9 89.936606
91.95 89.796169
92 89.655171
92.05 89.513609
92.1 89.371479
92.15 89.228775
92.2 89.085492
92.25 88.941627
92.3 88.797173
92.35 88.652126
92.4 88.50648
92.45 88.360229
92.5 88.213368
92.55 88.06589
92.6 87.91779
92.65 87.769061
92.7 87.619696
92.75 87.46969
92.8 87.319034
92.85 87.167724
92.9 87.01575
92.95 86.863106
93 86.709785
93.05 86.555778
93.1 86.401079
93.15 86.245679
93.2 86.08957
93.25 85.932744
93.3 85.775193
93.35 85.616908
93.4 85.45788
93.45 85.298101
93.5 85.137561
93.55 84.976252
93.6 84.814164
93.65 84.651287
93.7 84.487613
93.75 84.323131
93.8 84.157831
93.85 83.991704
93.9 83.824738
93.95 83.656925
94 83.488252
94.05 83.31871
94.1 83.148287
94.15 82.976973
94.2 82.804755
94.25 82.631624
94.3 82.457566
94.35 82.282571
94.4 82.106627
94.45 81.929721
94.5 81.75184
94.55 81.572974
94.6 81.393108
94.65 81.21223
94.7 81.030327
94.75 80.847386
94.8 80.663393
94.85 80.478334
94.9 80.292196
94.95 80.104964
95 79.916624
95.05 79.727162
95.1 79.536562
95.15 79.34481
95.2 79.15189
95.25 78.957787
95.3 78.762485
95.35 78.565968
95.4 78.368219
95.45 78.169222
95.5 77.968961
95.55 77.767417
95.6 77.564574
95.65 77.360414
95.7 77.154919
95.75 76.94807
95.8 76.739849
95.85 76.530237
95.9 76.319214
95.95 76.106761
96 75.892858
96.05 75.677484
96.1 75.46062
96.15 75.242243
96.2 75.022332
96.25 74.800865
96.3 74.577821
96.35 74.353175
96.4 74.126907
96.45 73.898991
96.5 73.669403
96.55 73.43812
96.6 73.205117
96.65 72.970367
96.7 72.733846
96.75 72.495527
96.8 72.255383
96.85 72.013386
96.9 71.769509
96.95 71.523723
97 71.276
97.05 71.026309
97.1 70.77462
97.15 70.520903
97.2 70.265126
97.25 70.007257
97.3 69.747263
97.35 69.485111
97.4 69.220766
97.45 68.954194
97.5 68.685359
97.55 68.414226
97.6 68.140756
97.65 67.864911
97.7 67.586654
97.75 67.305945
97.8 67.022743
97.85 66.737007
97.9 66.448694
97.95 66.157763
98 65.864168
98.05 65.567864
98.1 65.268807
98.15 64.966947
98.2 64.662238
98.25 64.35463
98.3 64.044073
98.35 63.730515
98.4 63.413904
98.45 63.094185
98.5 62.771303
98.55 62.445203
98.6 62.115825
98.65 61.783112
98.7 61.447002
98.75 61.107433
98.8 60.764342
98.85 60.417664
98.9 60.067331
98.95 59.713277
99 59.355431
99.05 58.99372
99.1 58.628073
99.15 58.258412
99.2 57.884663
99.25 57.506744
99.3 57.124575
99.35 56.738074
99.4 56.347154
99.45 55.951728
99.5 55.551706
99.55 55.146997
99.6 54.737505
99.65 54.323134
99.7 53.903784
99.75 53.479354
99.8 53.049737
99.85 52.614827
99.9 52.174513
99.95 51.728681
100 51.277214
100.05 50.819994
100.1 50.356895
100.15 49.887792
100.2 49.412555
100.25 48.93105
100.3 48.443139
100.35 47.948681
100.4 47.447531
100.45 46.939539
100.5 46.424551
100.55 45.902408
100.6 45.372949
100.65 44.836004
100.7 44.291403
100.75 43.738966
100.8 43.178511
100.85 42.60985
100.9 42.032788
100.95 41.447127
101 40.852658
101.05 40.249171
101.1 39.636447
101.15 39.01426
101.2 38.382378
101.25 37.74056
101.3 37.088559
101.35 36.426121
101.4 35.752981
101.45 35.068869
101.5 34.373503
101.55 33.666594
101.6 32.947843
101.65 32.216941
101.7 31.473569
101.75 30.717396
101.8 29.948082
101.85 29.165275
101.9 28.368609
101.95 27.557709
102 26.732182
102.05 25.891627
102.1 25.035624
102.15 24.163741
102.2 23.275529
102.25 22.370524
102.3 21.448244
102.35 20.508189
102.4 19.549842
102.45 18.572664
102.5 17.576099
102.55 16.559566
102.6 15.522465
102.65 14.464169
102.7 13.384029
102.75 12.281368
102.8 11.155484
102.85 10.005645
102.9 8.8310878
102.95 7.6310197
103 6.4046132
103.05 5.1510065
103.1 3.8693005
103.15 2.5585577
103.2 1.2177999
103.25 -0.1539936
103.3 -1.5578883
103.35 -2.9949963
103.4 -4.4664786
103.45 -5.9735468
103.5 -7.5174656
103.55 -9.0995542
103.6 -10.721188
103.65 -12.3838
103.7 -14.088882
103.75 -15.837986
103.8 -17.63272
103.85 -19.474752
103.9 -21.365806
103.95 -23.307657
104 -25.302128
104.05 -27.351082
104.1 -29.45641
104.15 -31.620024
104.2 -33.843836
104.25 -36.12974
104.3 -38.47959
104.35 -40.895165
104.4 -43.37814
104.45 -45.930042
104.5 -48.5522
104.55 -51.245696
104.6 -54.011301
104.65 -56.849411
104.7 -59.759974
104.75 -62.742419
104.8 -65.79558
104.85 -68.917626
104.9 -72.105997
104.95 -75.357352
105 -78.667527
105.05 -82.031525
105.1 -85.443522
105.15 -88.896905
105.2 -92.384342
105.25 -95.89788
105.3 -99.429073
105.35 -102.96914
105.4 -106.50911
105.45 -110.04004
105.5 -113.55317
105.55 -117.04008
105.6 -120.49285
105.65 -123.90422
105.7 -127.26763
105.75 -130.57732
105.8 -133.82838
105.85 -137.01674
105.9 -140.13913
105.95 -143.1931
106 -146.17691
106.05 -149.0895
106.1 -151.93039
106.15 -154.69965
106.2 -157.39777
106.25 -160.02563
106.3 -162.58441
106.35 -165.07556
106.4 -167.50071
106.45 -169.86163
106.5 -172.16022
106.55 -174.39841
106.6 -176.57822
106.65 -178.70166
106.7 -180.77073
106.75 -182.78743
106.8 -184.7537
106.85 -186.67148
106.9 -188.54261
106.95 -190.36892
107 -192.15216
107.05 -193.89402
107.1 -195.59613
107.15 -197.26007
107.2 -198.88734
107.25 -200.4794
107.3 -202.03763
107.35 -203.56338
107.4 -205.05792
107.45 -206.52248
107.5 -207.95823
107.55 -209.36631
107.6 -210.7478
107.65 -212.10374
107.7 -213.43512
107.75 -214.74291
107.8 -216.02801
107.85 -217.29132
107.9 -218.53368
107.95 -219.75591
108 -220.9588
108.05 -222.14311
108.1 -223.30957
108.15 -224.45887
108.2 -225.59171
108.25 -226.70874
108.3 -227.81059
108.35 -228.89788
108.4 -229.9712
108.45 -231.03113
108.5 -232.07823
108.55 -233.11304
108.6 -234.13608
108.65 -235.14788
108.7 -236.14891
108.75 -237.13967
108.8 -238.12064
108.85 -239.09226
108.9 -240.05499
108.95 -241.00926
109 -241.95551
109.05 -242.89415
109.1 -243.8256
109.15 -244.75025
109.2 -245.6685
109.25 -246.58074
109.3 -247.48734
109.35 -248.3887
109.4 -249.28516
109.45 -250.1771
109.5 -251.06488
109.55 -251.94885
109.6 -252.82937
109.65 -253.70678
109.7 -254.58142
109.75 -255.45364
109.8 -256.32379
109.85 -257.19219
109.9 -258.05918
109.95 -258.92511
110 -259.7903
110.05 -260.65509
110.1 -261.51981
110.15 -262.38481
110.2 -263.25041
110.25 -264.11695
110.3 -264.98478
110.35 -265.85424
110.4 -266.72566
110.45 -267.59939
110.5 -268.47578
110.55 -269.35519
110.6 -270.23798
110.65 -271.12449
110.7 -272.01511
110.75 -272.9102
110.8 -273.81014
110.85 -274.71531
110.9 -275.6261
110.95 -276.54291
111 -277.46615
111.05 -278.39623
111.1 -279.33357
111.15 -280.27861
111.2 -281.23178
111.25 -282.19355
111.3 -283.16437
111.35 -284.14473
111.4 -285.13511
111.45 -286.13602
111.5 -287.14797
111.55 -288.17151
111.6 -289.20718
111.65 -290.25554
111.7 -291.3172
111.75 -292.39275
111.8 -293.48282
111.85 -294.58806
111.9 -295.70916
111.95 -296.8468
112 -298.00173
112.05 -299.17468
112.1 -300.36646
112.15 -301.57789
112.2 -302.80982
112.25 -304.06314
112.3 -305.33881
112.35 -306.6378
112.4 -307.96115
112.45 -309.30994
112.5 -310.68531
112.55 -312.08847
112.6 -313.52068
112.65 -314.9833
112.7 -316.47774
112.75 -318.00552
112.8 -319.56825
112.85 -321.16764
112.9 -322.80551
112.95 -324.48382
113 -326.20466
113.05 -327.97027
113.1 -329.78306
113.15 -331.64564
113.2 -333.56079
113.25 -335.53153
113.3 -337.56113
113.35 -339.65309
113.4 -341.81123
113.45 -344.03967
113.5 -346.34284
113.55 -348.72556
113.6 -351.19298
113.65 -353.75065
113.7 -356.40448
113.75 -359.16079
113.8 -362.0262
113.85 -365.00763
113.9 -368.1122
113.95 -371.34709
114 -374.71935
114.05 -378.23565
114.1 -381.90196
114.15 -385.7231
114.2 -389.70229
114.25 -393.8405
114.3 -398.13587
114.35 -402.58309
114.4 -407.17277
114.45 -411.89109
114.5 -416.71961
114.55 -421.63544
114.6 -426.61182
114.65 -431.61911
114.7 -436.62602
114.75 -441.60116
114.8 -446.5145
114.85 -451.33871
114.9 -456.05021
114.95 -460.62978
115 -465.06285
115.05 -469.33936
115.1 -473.4534
115.15 -477.40265
115.2 -481.18777
115.25 -484.81174
115.3 -488.27931
115.35 -491.59641
115.4 -494.7698
115.45 -497.80664
115.5 -500.71429
115.55 -503.50005
115.6 -506.17107
115.65 -508.7342
115.7 -511.19598
115.75 -513.56256
115.8 -515.83971
115.85 -518.03284
115.9 -520.14694
115.95 -522.18666
116 -524.15632
116.05 -526.05989
116.1 -527.90108
116.15 -529.68328
116.2 -531.40966
116.25 -533.08314
116.3 -534.70643
116.35 -536.28206
116.4 -537.81235
116.45 -539.29949
116.5 -540.74549
116.55 -542.15226
116.6 -543.52154
116.65 -544.855
116.7 -546.15418
116.75 -547.42052
116.8 -548.65541
116.85 -549.8601
116.9 -551.03582
116.95 -552.18371
117 -553.30483
117.05 -554.40021
117.1 -555.47081
117.15 -556.51755
117.2 -557.54128
117.25 -558.54284
117.3 -559.523
117.35 -560.48251
117.4 -561.42208
117.45 -562.34238
117.5 -563.24406
117.55 -564.12774
117.6 -564.99401
117.65 -565.84342
117.7 -566.67652
117.75 -567.49382
117.8 -568.29581
117.85 -569.08298
117.9 -569.85577
117.95 -570.61462
118 -571.35995
118.05 -572.09217
118.1 -572.81165
118.15 -573.51877
118.2 -574.21389
118.25 -574.89735
118.3 -575.56949
118.35 -576.23062
118.4 -576.88106
118.45 -577.52109
118.5 -578.15101
118.55 -578.77108
118.6 -579.38159
118.65 -579.98277
118.7 -580.57489
118.75 -581.15818
118.8 -581.73287
118.85 -582.29918
118.9 -582.85734
118.95 -583.40755
119 -583.95001
119.05 -584.48492
119.1 -585.01247
119.15 -585.53284
119.2 -586.04621
119.25 -586.55275
119.3 -587.05263
119.35 -587.546
119.4 -588.03302
119.45 -588.51386
119.5 -588.98864
119.55 -589.45752
119.6 -589.92063
119.65 -590.3781
119.7 -590.83007
119.75 -591.27666
119.8 -591.71799
119.85 -592.15419
119.9 -592.58536
119.95 -593.01163
120 -593.43309
120.05 -593.84985
120.1 -594.26203
120.15 -594.6697
120.2 -595.07298
120.25 -595.47196
120.3 -595.86673
120.35 -596.25737
120.4 -596.64398
120.45 -597.02664
120.5 -597.40544
120.55 -597.78044
120.6 -598.15173
120.65 -598.51939
120.7 -598.88348
120.75 -599.24409
120.8 -599.60128
120.85 -599.95511
120.9 -600.30566
120.95 -600.65299
121 -600.99716
121.05 -601.33824
121.1 -601.67628
121.15 -602.01135
121.2 -602.34349
121.25 -602.67277
121.3 -602.99924
121.35 -603.32295
121.4 -603.64395
121.45 -603.9623
121.5 -604.27804
121.55 -604.59123
121.6 -604.9019
121.65 -605.21011
121.7 -605.51589
121.75 -605.8193
121.8 -606.12037
121.85 -606.41915
121.9 -606.71568
121.95 -607.00999
122 -607.30213
122.05 -607.59213
122.1 -607.88003
122.15 -608.16587
122.2 -608.44969
122.25 -608.73151
122.3 -609.01137
122.35 -609.28931
122.4 -609.56535
122.45 -609.83954
122.5 -610.11189
122.55 -610.38244
122.6 -610.65123
122.65 -610.91827
122.7 -611.1836
122.75 -611.44724
122.8 -611.70923
122.85 -611.96959
122.9 -612.22834
122.95 -612.48552
123 -612.74114
123.05 -612.99524
123.1 -613.24783
123.15 -613.49894
123.2 -613.74859
123.25 -613.9968
123.3 -614.24361
123.35 -614.48902
123.4 -614.73306
123.45 -614.97576
123.5 -615.21713
123.55 -615.45719
123.6 -615.69596
123.65 -615.93346
123.7 -616.16971
123.75 -616.40474
123.8 -616.63855
123.85 -616.87116
123.9 -617.1026
123.95 -617.33288
124 -617.56202
124.05 -617.79003
124.1 -618.01693
124.15 -618.24273
124.2 -618.46746
124.25 -618.69113
124.3 -618.91375
124.35 -619.13534
124.4 -619.3559
124.45 -619.57547
124.5 -619.79405
124.55 -620.01165
124.6 -620.22829
124.65 -620.44398
124.7 -620.65874
124.75 -620.87258
124.8 -621.0855
124.85 -621.29753
124.9 -621.50868
124.95 -621.71895
125 -621.92836
125.05 -622.13693
125.1 -622.34465
125.15 -622.55155
125.2 -622.75764
125.25 -622.96292
125.3 -623.1674
125.35 -623.37111
125.4 -623.57404
125.45 -623.77621
125.5 -623.97763
125.55 -624.1783
125.6 -624.37824
125.65 -624.57746
125.7 -624.77597
125.75 -624.97377
125.8 -625.17087
125.85 -625.36729
125.9 -625.56303
125.95 -625.75811
126 -625.95252
126.05 -626.14628
126.1 -626.33939
126.15 -626.53188
126.2 -626.72373
126.25 -626.91496
126.3 -627.10559
126.35 -627.29561
126.4 -627.48503
126.45 -627.67386
126.5 -627.86211
126.55 -628.04979
126.6 -628.2369
126.65 -628.42345
126.7 -628.60944
126.75 -628.79489
126.8 -628.9798
126.85 -629.16418
126.9 -629.34803
126.95 -629.53135
127 -629.71417
127.05 -629.89648
127.1 -630.07828
127.15 -630.25959
127.2 -630.44041
127.25 -630.62074
127.3 -630.8006
127.35 -630.97998
127.4 -631.1589
127.45 -631.33736
127.5 -631.51536
127.55 -631.69291
127.6 -631.87002
127.65 -632.04668
127.7 -632.22291
127.75 -632.39872
127.8 -632.57409
127.85 -632.74905
127.9 -632.9236
127.95 -633.09773
128 -633.27146
128.05 -633.44479
128.1 -633.61772
128.15 -633.79026
128.2 -633.96242
128.25 -634.13419
128.3 -634.30559
128.35 -634.47661
128.4 -634.64727
128.45 -634.81756
128.5 -634.98748
128.55 -635.15706
128.6 -635.32628
128.65 -635.49515
128.7 -635.66368
128.75 -635.83186
128.8 -635.99971
128.85 -636.16723
128.9 -636.33442
128.95 -636.50128
129 -636.66783
129.05 -636.83405
129.1 -636.99996
129.15 -637.16556
129.2 -637.33085
129.25 -637.49584
129.3 -637.66052
129.35 -637.82491
129.4 -637.98901
129.45 -638.15282
129.5 -638.31633
129.55 -638.47957
129.6 -638.64252
129.65 -638.8052
129.7 -638.9676
129.75 -639.12973
129.8 -639.29159
129.85 -639.45318
129.9 -639.61451
129.95 -639.77559
130 -639.9364
130.05 -640.09696
130.1 -640.25727
130.15 -640.41734
130.2 -640.57715
130.25 -640.73673
130.3 -640.89606
130.35 -641.05515
130.4 -641.21401
130.45 -641.37264
130.5 -641.53104
130.55 -641.68921
130.6 -641.84715
130.65 -642.00488
130.7 -642.16238
130.75 -642.31966
130.8 -642.47673
130.85 -642.63359
130.9 -642.79024
130.95 -642.94668
131 -643.10291
131.05 -643.25894
131.1 -643.41476
131.15 -643.57039
131.2 -643.72582
131.25 -643.88106
131.3 -644.0361
131.35 -644.19096
131.4 -644.34562
131.45 -644.5001
131.5 -644.65439
131.55 -644.8085
131.6 -644.96243
131.65 -645.11619
131.7 -645.26976
131.75 -645.42316
131.8 -645.57639
131.85 -645.72945
131.9 -645.88234
131.95 -646.03506
132 -646.18762
132.05 -646.34001
132.1 -646.49224
132.15 -646.64432
132.2 -646.79623
132.25 -646.94799
132.3 -647.09959
132.35 -647.25104
132.4 -647.40234
132.45 -647.55349
132.5 -647.70449
132.55 -647.85535
132.6 -648.00606
132.65 -648.15663
132.7 -648.30705
132.75 -648.45734
132.8 -648.60749
132.85 -648.7575
132.9 -648.90738
132.95 -649.05712
133 -649.20673
133.05 -649.35621
133.1 -649.50556
133.15 -649.65479
133.2 -649.80388
133.25 -649.95285
133.3 -650.1017
133.35 -650.25043
133.4 -650.39903
133.45 -650.54752
133.5 -650.69588
133.55 -650.84413
133.6 -650.99227
133.65 -651.14029
133.7 -651.28819
133.75 -651.43599
133.8 -651.58368
133.85 -651.73125
133.9 -651.87872
133.95 -652.02608
134 -652.17334
134.05 -652.32049
134.1 -652.46754
134.15 -652.61449
134.2 -652.76134
134.25 -652.90809
134.3 -653.05474
134.35 -653.20129
134.4 -653.34774
134.45 -653.49411
134.5 -653.64037
134.55 -653.78655
134.6 -653.93263
134.65 -654.07863
134.7 -654.22453
134.75 -654.37034
134.8 -654.51607
134.85 -654.66171
134.9 -654.80727
134.95 -654.95274
135 -655.09813
135.05 -655.24344
135.1 -655.38866
135.15 -655.53381
135.2 -655.67887
135.25 -655.82386
135.3 -655.96877
135.35 -656.11361
135.4 -656.25836
135.45 -656.40305
135.5 -656.54766
135.55 -656.69219
135.6 -656.83666
135.65 -656.98105
135.7 -657.12538
135.75 -657.26963
135.8 -657.41382
135.85 -657.55794
135.9 -657.70199
135.95 -657.84598
136 -657.9899
136.05 -658.13376
136.1 -658.27756
136.15 -658.42129
136.2 -658.56496
136.25 -658.70857
136.3 -658.85212
136.35 -658.99561
136.4 -659.13905
136.45 -659.28242
136.5 -659.42574
136.55 -659.569
136.6 -659.71221
136.65 -659.85536
136.7 -659.99846
136.75 -660.14151
136.8 -660.2845
136.85 -660.42744
136.9 -660.57033
136.95 -660.71317
137 -660.85596
137.05 -660.9987
137.1 -661.1414
137.15 -661.28404
137.2 -661.42664
137.25 -661.5692
137.3 -661.7117
137.35 -661.85417
137.4 -661.99659
137.45 -662.13896
137.5 -662.28129
137.55 -662.42358
137.6 -662.56583
137.65 -662.70804
137.7 -662.85021
137.75 -662.99234
137.8 -663.13443
137.85 -663.27648
137.9 -663.41849
137.95 -663.56046
138 -663.7024
138.05 -663.8443
138.1 -663.98617
138.15 -664.128
138.2 -664.2698
138.25 -664.41157
138.3 -664.5533
138.35 -664.69499
138.4 -664.83666
138.45 -664.97829
138.5 -665.1199
138.55 -665.26147
138.6 -665.40301
138.65 -665.54453
138.7 -665.68601
138.75 -665.82747
138.8 -665.9689
138.85 -666.1103
138.9 -666.25167
138.95 -666.39302
139 -666.53434
139.05 -666.67564
139.1 -666.81691
139.15 -666.95816
139.2 -667.09938
139.25 -667.24058
139.3 -667.38176
139.35 -667.52292
139.4 -667.66405
139.45 -667.80516
139.5 -667.94625
139.55 -668.08732
139.6 -668.22837
139.65 -668.3694
139.7 -668.51041
[truncated: 12,042 more rows]
