# Supplementary material
Source: publisher figshare collection journal article supplement (https://frontiersin.figshare.com/ndownloader/files/24979811)
Supplement: Supplementary file 1 [file 24979811 › datasheet/affect of wring scheme/B.csv]

Frequency / GHz SZmax(2)	Zmax(2) (a=3.1)/arg	degrees
----------------------------------------------------------------------
90 95.007447
90.05 94.888183
90.1 94.768502
90.15 94.648402
90.2 94.527878
90.25 94.406927
90.3 94.285546
90.35 94.16373
90.4 94.041477
90.45 93.918782
90.5 93.795643
90.55 93.672054
90.6 93.548013
90.65 93.423515
90.7 93.298557
90.75 93.173134
90.8 93.047243
90.85 92.920879
90.9 92.794039
90.95 92.666718
91 92.538912
91.05 92.410617
91.1 92.281828
91.15 92.152541
91.2 92.022752
91.25 91.892456
91.3 91.761649
91.35 91.630326
91.4 91.498482
91.45 91.366113
91.5 91.233213
91.55 91.099779
91.6 90.965804
91.65 90.831285
91.7 90.696215
91.75 90.560591
91.8 90.424407
91.85 90.287657
91.9 90.150336
91.95 90.012439
92 89.87396
92.05 89.734894
92.1 89.595236
92.15 89.454979
92.2 89.314117
92.25 89.172646
92.3 89.030558
92.35 88.887849
92.4 88.744511
92.45 88.60054
92.5 88.455927
92.55 88.310668
92.6 88.164756
92.65 88.018183
92.7 87.870944
92.75 87.723032
92.8 87.57444
92.85 87.425161
92.9 87.275189
92.95 87.124515
93 86.973133
93.05 86.821035
93.1 86.668214
93.15 86.514663
93.2 86.360373
93.25 86.205338
93.3 86.049549
93.35 85.892998
93.4 85.735677
93.45 85.577578
93.5 85.418692
93.55 85.259012
93.6 85.098528
93.65 84.937231
93.7 84.775113
93.75 84.612165
93.8 84.448378
93.85 84.283742
93.9 84.118248
93.95 83.951886
94 83.784646
94.05 83.616519
94.1 83.447495
94.15 83.277563
94.2 83.106713
94.25 82.934935
94.3 82.762217
94.35 82.588549
94.4 82.41392
94.45 82.238319
94.5 82.061734
94.55 81.884153
94.6 81.705566
94.65 81.525959
94.7 81.34532
94.75 81.163638
94.8 80.980899
94.85 80.797092
94.9 80.612202
94.95 80.426216
95 80.239122
95.05 80.050905
95.1 79.861551
95.15 79.671046
95.2 79.479377
95.25 79.286527
95.3 79.092483
95.35 78.897229
95.4 78.700749
95.45 78.503028
95.5 78.30405
95.55 78.103799
95.6 77.902257
95.65 77.699409
95.7 77.495236
95.75 77.289722
95.8 77.082848
95.85 76.874597
95.9 76.664949
95.95 76.453887
96 76.241391
96.05 76.027441
96.1 75.812017
96.15 75.5951
96.2 75.376669
96.25 75.156702
96.3 74.935178
96.35 74.712076
96.4 74.487373
96.45 74.261046
96.5 74.033072
96.55 73.803428
96.6 73.572089
96.65 73.339032
96.7 73.104231
96.75 72.86766
96.8 72.629294
96.85 72.389106
96.9 72.147069
96.95 71.903155
97 71.657337
97.05 71.409585
97.1 71.15987
97.15 70.908163
97.2 70.654432
97.25 70.398647
97.3 70.140776
97.35 69.880786
97.4 69.618644
97.45 69.354316
97.5 69.087768
97.55 68.818964
97.6 68.547868
97.65 68.274443
97.7 67.998652
97.75 67.720456
97.8 67.439816
97.85 67.156692
97.9 66.871042
97.95 66.582824
98 66.291996
98.05 65.998514
98.1 65.702332
98.15 65.403405
98.2 65.101687
98.25 64.797128
98.3 64.48968
98.35 64.179292
98.4 63.865914
98.45 63.549492
98.5 63.229973
98.55 62.907301
98.6 62.581421
98.65 62.252273
98.7 61.9198
98.75 61.583941
98.8 61.244633
98.85 60.901814
98.9 60.555417
98.95 60.205377
99 59.851625
99.05 59.494091
99.1 59.132703
99.15 58.767389
99.2 58.398071
99.25 58.024674
99.3 57.647118
99.35 57.265321
99.4 56.8792
99.45 56.488671
99.5 56.093644
99.55 55.694031
99.6 55.289738
99.65 54.880671
99.7 54.466733
99.75 54.047824
99.8 53.623841
99.85 53.194679
99.9 52.76023
99.95 52.320383
100 51.875023
100.05 51.424034
100.1 50.967295
100.15 50.504682
100.2 50.036068
100.25 49.561322
100.3 49.08031
100.35 48.592893
100.4 48.09893
100.45 47.598273
100.5 47.090773
100.55 46.576275
100.6 46.054618
100.65 45.52564
100.7 44.989171
100.75 44.445037
100.8 43.89306
100.85 43.333055
100.9 42.764833
100.95 42.188197
101 41.602945
101.05 41.008872
101.1 40.405761
101.15 39.793393
101.2 39.171539
101.25 38.539965
101.3 37.898429
101.35 37.246681
101.4 36.584463
101.45 35.911509
101.5 35.227544
101.55 34.532285
101.6 33.825438
101.65 33.106701
101.7 32.375762
101.75 31.632296
101.8 30.875971
101.85 30.10644
101.9 29.323347
101.95 28.526322
102 27.714982
102.05 26.888932
102.1 26.047762
102.15 25.191047
102.2 24.318349
102.25 23.42921
102.3 22.52316
102.35 21.599708
102.4 20.658346
102.45 19.698547
102.5 18.719764
102.55 17.721428
102.6 16.702949
102.65 15.663713
102.7 14.603083
102.75 13.520394
102.8 12.414957
102.85 11.286052
102.9 10.132932
102.95 8.9548156
103 7.7508905
103.05 6.5203092
103.1 5.2621874
103.15 3.9756026
103.2 2.6595917
103.25 1.3131491
103.3 -0.064775751
103.35 -1.47528
103.4 -2.9195102
103.45 -4.3986643
103.5 -5.9139941
103.55 -7.4668071
103.6 -9.0584688
103.65 -10.690405
103.7 -12.364102
103.75 -14.081109
103.8 -15.84304
103.85 -17.65157
103.9 -19.508438
103.95 -21.415441
104 -23.374437
104.05 -25.38733
104.1 -27.456072
104.15 -29.582646
104.2 -31.769058
104.25 -34.017316
104.3 -36.329409
104.35 -38.707286
104.4 -41.152815
104.45 -43.667756
104.5 -46.253705
104.55 -48.91205
104.6 -51.643912
104.65 -54.450073
104.7 -57.330909
104.75 -60.286313
104.8 -63.315612
104.85 -66.417491
104.9 -69.589914
104.95 -72.830058
105 -76.134256
105.05 -79.497965
105.1 -82.915748
105.15 -86.381299
105.2 -89.887485
105.25 -93.426432
105.3 -96.989643
105.35 -100.56814
105.4 -104.15265
105.45 -107.73376
105.5 -111.30216
105.55 -114.84876
105.6 -118.36496
105.65 -121.84273
105.7 -125.27475
105.75 -128.65453
105.8 -131.97644
105.85 -135.23575
105.9 -138.42861
105.95 -141.55205
106 -144.60389
106.05 -147.58271
106.1 -150.48774
106.15 -153.31881
106.2 -156.07627
106.25 -158.76089
106.3 -161.3738
106.35 -163.9164
106.4 -166.39035
106.45 -168.79746
106.5 -171.13967
106.55 -173.41901
106.6 -175.63756
106.65 -177.79741
106.7 -179.90067
106.75 -181.94943
106.8 -183.94574
106.85 -185.89161
106.9 -187.78899
106.95 -189.63979
107 -191.44585
107.05 -193.20895
107.1 -194.93078
107.15 -196.61301
107.2 -198.25719
107.25 -199.86486
107.3 -201.43746
107.35 -202.97639
107.4 -204.48297
107.45 -205.95849
107.5 -207.40417
107.55 -208.82117
107.6 -210.21062
107.65 -211.5736
107.7 -212.91113
107.75 -214.22421
107.8 -215.51378
107.85 -216.78075
107.9 -218.026
107.95 -219.25036
108 -220.45465
108.05 -221.63964
108.1 -222.80607
108.15 -223.95468
108.2 -225.08615
108.25 -226.20115
108.3 -227.30033
108.35 -228.38431
108.4 -229.4537
108.45 -230.50909
108.5 -231.55103
108.55 -232.58008
108.6 -233.59676
108.65 -234.60159
108.7 -235.59508
108.75 -236.5777
108.8 -237.54993
108.85 -238.51224
108.9 -239.46506
108.95 -240.40883
109 -241.34399
109.05 -242.27095
109.1 -243.1901
109.15 -244.10186
109.2 -245.00662
109.25 -245.90474
109.3 -246.79661
109.35 -247.6826
109.4 -248.56306
109.45 -249.43835
109.5 -250.30882
109.55 -251.17482
109.6 -252.03668
109.65 -252.89475
109.7 -253.74934
109.75 -254.6008
109.8 -255.44944
109.85 -256.2956
109.9 -257.13958
109.95 -257.9817
110 -258.82229
110.05 -259.66166
110.1 -260.50013
110.15 -261.338
110.2 -262.17558
110.25 -263.01321
110.3 -263.85118
110.35 -264.68981
110.4 -265.52942
110.45 -266.37032
110.5 -267.21284
110.55 -268.0573
110.6 -268.90401
110.65 -269.75331
110.7 -270.60553
110.75 -271.46099
110.8 -272.32005
110.85 -273.18303
110.9 -274.05029
110.95 -274.92218
111 -275.79906
111.05 -276.68129
111.1 -277.56924
111.15 -278.46329
111.2 -279.36382
111.25 -280.27124
111.3 -281.18593
111.35 -282.10832
111.4 -283.03882
111.45 -283.97787
111.5 -284.92591
111.55 -285.88339
111.6 -286.85077
111.65 -287.82855
111.7 -288.81721
111.75 -289.81726
111.8 -290.82922
111.85 -291.85365
111.9 -292.89108
111.95 -293.94211
112 -295.00733
112.05 -296.08735
112.1 -297.18283
112.15 -298.29442
112.2 -299.42281
112.25 -300.56872
112.3 -301.7329
112.35 -302.91613
112.4 -304.11922
112.45 -305.34301
112.5 -306.58839
112.55 -307.85629
112.6 -309.14768
112.65 -310.46357
112.7 -311.80505
112.75 -313.17323
112.8 -314.56931
112.85 -315.99454
112.9 -317.45025
112.95 -318.93784
113 -320.4588
113.05 -322.01472
113.1 -323.60728
113.15 -325.23828
113.2 -326.90964
113.25 -328.62342
113.3 -330.38181
113.35 -332.18718
113.4 -334.04205
113.45 -335.94917
113.5 -337.91147
113.55 -339.93212
113.6 -342.01452
113.65 -344.16237
113.7 -346.37963
113.75 -348.67057
113.8 -351.0398
113.85 -353.49222
113.9 -356.03312
113.95 -358.66809
114 -361.40305
114.05 -364.24421
114.1 -367.19799
114.15 -370.27096
114.2 -373.46968
114.25 -376.80054
114.3 -380.26951
114.35 -383.88183
114.4 -387.64163
114.45 -391.55148
114.5 -395.61188
114.55 -399.82069
114.6 -404.17262
114.65 -408.6587
114.7 -413.26597
114.75 -417.97734
114.8 -422.77176
114.85 -427.62469
114.9 -432.50896
114.95 -437.39587
115 -442.25645
115.05 -447.06281
115.1 -451.78929
115.15 -456.41344
115.2 -460.91663
115.25 -465.28435
115.3 -469.5062
115.35 -473.57558
115.4 -477.48929
115.45 -481.247
115.5 -484.85065
115.55 -488.30398
115.6 -491.61199
115.65 -494.78056
115.7 -497.81611
115.75 -500.72533
115.8 -503.51497
115.85 -506.19169
115.9 -508.76195
115.95 -511.23196
116 -513.60762
116.05 -515.89446
116.1 -518.09771
116.15 -520.22224
116.2 -522.27257
116.25 -524.25294
116.3 -526.16724
116.35 -528.01913
116.4 -529.81196
116.45 -531.54887
116.5 -533.23276
116.55 -534.86632
116.6 -536.45205
116.65 -537.99229
116.7 -539.48921
116.75 -540.94482
116.8 -542.36102
116.85 -543.73957
116.9 -545.08212
116.95 -546.39023
117 -547.66535
117.05 -548.90884
117.1 -550.12199
117.15 -551.30602
117.2 -552.46206
117.25 -553.5912
117.3 -554.69447
117.35 -555.77281
117.4 -556.82717
117.45 -557.85839
117.5 -558.86732
117.55 -559.85474
117.6 -560.82139
117.65 -561.76799
117.7 -562.69522
117.75 -563.60373
117.8 -564.49413
117.85 -565.36702
117.9 -566.22297
117.95 -567.06251
118 -567.88617
118.05 -568.69443
118.1 -569.48779
118.15 -570.26669
118.2 -571.03157
118.25 -571.78287
118.3 -572.52097
118.35 -573.24627
118.4 -573.95914
118.45 -574.65995
118.5 -575.34904
118.55 -576.02674
118.6 -576.69338
118.65 -577.34927
118.7 -577.9947
118.75 -578.62997
118.8 -579.25535
118.85 -579.8711
118.9 -580.4775
118.95 -581.07478
119 -581.6632
119.05 -582.24298
119.1 -582.81435
119.15 -583.37752
119.2 -583.93272
119.25 -584.48014
119.3 -585.01998
119.35 -585.55243
119.4 -586.07768
119.45 -586.5959
119.5 -587.10728
119.55 -587.61197
119.6 -588.11014
119.65 -588.60196
119.7 -589.08756
119.75 -589.56711
119.8 -590.04075
119.85 -590.5086
119.9 -590.97083
119.95 -591.42754
120 -591.87888
120.05 -592.32496
120.1 -592.76591
120.15 -593.20184
120.2 -593.63287
120.25 -594.05911
120.3 -594.48067
120.35 -594.89765
120.4 -595.31015
120.45 -595.71828
120.5 -596.12213
120.55 -596.52179
120.6 -596.91736
120.65 -597.30892
120.7 -597.69657
120.75 -598.08038
120.8 -598.46045
120.85 -598.83684
120.9 -599.20965
120.95 -599.57894
121 -599.94479
121.05 -600.30727
121.1 -600.66646
121.15 -601.02243
121.2 -601.37524
121.25 -601.72495
121.3 -602.07165
121.35 -602.41538
121.4 -602.75621
121.45 -603.0942
121.5 -603.42942
121.55 -603.76191
121.6 -604.09175
121.65 -604.41897
121.7 -604.74364
121.75 -605.06582
121.8 -605.38555
121.85 -605.70288
121.9 -606.01788
121.95 -606.33058
122 -606.64104
122.05 -606.9493
122.1 -607.25542
122.15 -607.55943
122.2 -607.86139
122.25 -608.16134
122.3 -608.45932
122.35 -608.75538
122.4 -609.04956
122.45 -609.3419
122.5 -609.63244
122.55 -609.92123
122.6 -610.2083
122.65 -610.49369
122.7 -610.77744
122.75 -611.05958
122.8 -611.34015
122.85 -611.61918
122.9 -611.8967
122.95 -612.17275
123 -612.44735
123.05 -612.72052
123.1 -612.9923
123.15 -613.26269
123.2 -613.53172
123.25 -613.79939
123.3 -614.06571
123.35 -614.33068
123.4 -614.59429
123.45 -614.85653
123.5 -615.11736
123.55 -615.37675
123.6 -615.63465
123.65 -615.89098
123.7 -616.14566
123.75 -616.39857
123.8 -616.6496
123.85 -616.89857
123.9 -617.14529
123.95 -617.38955
124 -617.63107
124.05 -617.86956
124.1 -618.10469
124.15 -618.33607
124.2 -618.5633
124.25 -618.78594
124.3 -619.00355
124.35 -619.21567
124.4 -619.42189
124.45 -619.62183
124.5 -619.81522
124.55 -620.00188
124.6 -620.1818
124.65 -620.35516
124.7 -620.52234
124.75 -620.68393
124.8 -620.84073
124.85 -620.9937
124.9 -621.14395
124.95 -621.29263
125 -621.44091
125.05 -621.58989
125.1 -621.74056
125.15 -621.89374
125.2 -622.05007
125.25 -622.20999
125.3 -622.37378
125.35 -622.54153
125.4 -622.7132
125.45 -622.88864
125.5 -623.06763
125.55 -623.24988
125.6 -623.43506
125.65 -623.62285
125.7 -623.81291
125.75 -624.00491
125.8 -624.19856
125.85 -624.39357
125.9 -624.58967
125.95 -624.78664
126 -624.98427
126.05 -625.18236
126.1 -625.38075
126.15 -625.57931
126.2 -625.77791
126.25 -625.97643
126.3 -626.17479
126.35 -626.37291
126.4 -626.57073
126.45 -626.76817
126.5 -626.9652
126.55 -627.16178
126.6 -627.35787
126.65 -627.55344
126.7 -627.74848
126.75 -627.94295
126.8 -628.13686
126.85 -628.33018
126.9 -628.52291
126.95 -628.71505
127 -628.90659
127.05 -629.09752
127.1 -629.28785
127.15 -629.47757
127.2 -629.6667
127.25 -629.85523
127.3 -630.04316
127.35 -630.2305
127.4 -630.41726
127.45 -630.60344
127.5 -630.78904
127.55 -630.97407
127.6 -631.15854
127.65 -631.34245
127.7 -631.52581
127.75 -631.70862
127.8 -631.8909
127.85 -632.07265
127.9 -632.25387
127.95 -632.43457
128 -632.61477
128.05 -632.79446
128.1 -632.97365
128.15 -633.15235
128.2 -633.33056
128.25 -633.5083
128.3 -633.68557
128.35 -633.86237
128.4 -634.03871
128.45 -634.2146
128.5 -634.39004
128.55 -634.56504
128.6 -634.73961
128.65 -634.91374
128.7 -635.08746
128.75 -635.26075
128.8 -635.43364
128.85 -635.60611
128.9 -635.77819
128.95 -635.94987
129 -636.12115
129.05 -636.29206
129.1 -636.46258
129.15 -636.63273
129.2 -636.8025
129.25 -636.97191
129.3 -637.14096
129.35 -637.30966
129.4 -637.478
129.45 -637.64599
129.5 -637.81364
129.55 -637.98095
129.6 -638.14793
129.65 -638.31458
129.7 -638.4809
129.75 -638.64691
129.8 -638.81259
129.85 -638.97796
129.9 -639.14302
129.95 -639.30778
130 -639.47223
130.05 -639.63638
130.1 -639.80024
130.15 -639.96381
130.2 -640.1271
130.25 -640.29009
130.3 -640.45281
130.35 -640.61525
130.4 -640.77742
130.45 -640.93932
130.5 -641.10095
130.55 -641.26232
130.6 -641.42342
130.65 -641.58427
130.7 -641.74487
130.75 -641.90521
130.8 -642.06531
130.85 -642.22516
130.9 -642.38476
130.95 -642.54413
131 -642.70326
131.05 -642.86216
131.1 -643.02083
131.15 -643.17927
131.2 -643.33748
131.25 -643.49547
131.3 -643.65324
131.35 -643.81079
131.4 -643.96813
131.45 -644.12525
131.5 -644.28217
131.55 -644.43887
131.6 -644.59537
131.65 -644.75167
131.7 -644.90777
131.75 -645.06367
131.8 -645.21937
131.85 -645.37488
131.9 -645.5302
131.95 -645.68533
132 -645.84027
132.05 -645.99502
132.1 -646.1496
132.15 -646.30399
132.2 -646.45821
132.25 -646.61224
132.3 -646.76611
132.35 -646.9198
132.4 -647.07332
132.45 -647.22667
132.5 -647.37986
132.55 -647.53288
132.6 -647.68573
132.65 -647.83843
132.7 -647.99097
132.75 -648.14335
132.8 -648.29557
132.85 -648.44764
132.9 -648.59956
132.95 -648.75133
133 -648.90295
133.05 -649.05442
133.1 -649.20575
133.15 -649.35693
133.2 -649.50798
133.25 -649.65888
133.3 -649.80964
133.35 -649.96027
133.4 -650.11076
133.45 -650.26112
133.5 -650.41134
133.55 -650.56143
133.6 -650.7114
133.65 -650.86123
133.7 -651.01094
133.75 -651.16053
133.8 -651.30999
133.85 -651.45933
133.9 -651.60854
133.95 -651.75764
134 -651.90662
134.05 -652.05549
134.1 -652.20423
134.15 -652.35287
134.2 -652.50139
134.25 -652.6498
134.3 -652.7981
134.35 -652.94629
134.4 -653.09437
134.45 -653.24235
134.5 -653.39022
134.55 -653.53799
134.6 -653.68566
134.65 -653.83322
134.7 -653.98068
134.75 -654.12805
134.8 -654.27531
134.85 -654.42248
134.9 -654.56955
134.95 -654.71653
135 -654.86342
135.05 -655.01021
135.1 -655.15691
135.15 -655.30352
135.2 -655.45004
135.25 -655.59647
135.3 -655.74282
135.35 -655.88908
135.4 -656.03525
135.45 -656.18134
135.5 -656.32735
135.55 -656.47328
135.6 -656.61912
135.65 -656.76488
135.7 -656.91057
135.75 -657.05617
135.8 -657.2017
135.85 -657.34715
135.9 -657.49253
135.95 -657.63783
136 -657.78306
136.05 -657.92821
136.1 -658.07329
136.15 -658.21831
136.2 -658.36325
136.25 -658.50812
136.3 -658.65292
136.35 -658.79766
136.4 -658.94232
136.45 -659.08693
136.5 -659.23146
136.55 -659.37594
136.6 -659.52035
136.65 -659.66469
136.7 -659.80897
136.75 -659.9532
136.8 -660.09736
136.85 -660.24146
136.9 -660.3855
136.95 -660.52949
137 -660.67341
137.05 -660.81728
137.1 -660.9611
137.15 -661.10485
137.2 -661.24856
137.25 -661.3922
137.3 -661.5358
137.35 -661.67934
137.4 -661.82283
137.45 -661.96627
137.5 -662.10966
137.55 -662.253
137.6 -662.39629
137.65 -662.53952
137.7 -662.68272
137.75 -662.82586
137.8 -662.96896
137.85 -663.11201
137.9 -663.25501
137.95 -663.39797
138 -663.54089
138.05 -663.68376
138.1 -663.82659
138.15 -663.96937
138.2 -664.11211
138.25 -664.25481
138.3 -664.39747
138.35 -664.54009
138.4 -664.68267
138.45 -664.82521
138.5 -664.96771
138.55 -665.11018
138.6 -665.2526
138.65 -665.39499
138.7 -665.53734
138.75 -665.67965
138.8 -665.82193
138.85 -665.96417
138.9 -666.10638
138.95 -666.24856
139 -666.3907
139.05 -666.5328
139.1 -666.67488
139.15 -666.81692
139.2 -666.95893
139.25 -667.10091
139.3 -667.24285
139.35 -667.38477
139.4 -667.52666
139.45 -667.66851
139.5 -667.81034
139.55 -667.95214
139.6 -668.09391
139.65 -668.23565
139.7 -668.37736
139.75 -668.51905
139.8 -668.66071
139.85 -668.80234
139.9 -668.94395
139.95 -669.08553
140 -669.22709
Frequency / GHz SZmax(2)	Zmax(2) (a=3.69)/arg	degrees
----------------------------------------------------------------------
90 88.50931
90.05 88.329078
90.1 88.147673
90.15 87.965081
90.2 87.781286
90.25 87.59627
90.3 87.410017
90.35 87.222509
90.4 87.03373
90.45 86.84366
90.5 86.652284
90.55 86.459581
90.6 86.265532
90.65 86.070119
90.7 85.873323
90.75 85.675122
90.8 85.475496
90.85 85.274426
90.9 85.071888
90.95 84.867863
91 84.662327
91.05 84.455259
91.1 84.246634
91.15 84.036431
91.2 83.824624
91.25 83.611189
91.3 83.396101
91.35 83.179336
91.4 82.960866
91.45 82.740665
91.5 82.518706
91.55 82.294962
91.6 82.069403
91.65 81.842002
91.7 81.612728
91.75 81.381552
91.8 81.148442
91.85 80.913367
91.9 80.676295
91.95 80.437193
92 80.196027
92.05 79.952763
92.1 79.707365
92.15 79.459798
92.2 79.210025
92.25 78.958007
92.3 78.703708
92.35 78.447086
92.4 78.188103
92.45 77.926716
92.5 77.662883
92.55 77.396562
92.6 77.127708
92.65 76.856275
92.7 76.582217
92.75 76.305488
92.8 76.026037
92.85 75.743816
92.9 75.458773
92.95 75.170857
93 74.880012
93.05 74.586185
93.1 74.289319
93.15 73.989357
93.2 73.686239
93.25 73.379905
93.3 73.070293
93.35 72.757338
93.4 72.440976
93.45 72.121138
93.5 71.797757
93.55 71.470762
93.6 71.140079
93.65 70.805636
93.7 70.467354
93.75 70.125156
93.8 69.778961
93.85 69.428686
93.9 69.074247
93.95 68.715555
94 68.352521
94.05 67.985054
94.1 67.613057
94.15 67.236433
94.2 66.855083
94.25 66.468903
94.3 66.077787
94.35 65.681626
94.4 65.280307
94.45 64.873717
94.5 64.461735
94.55 64.044239
94.6 63.621104
94.65 63.1922
94.7 62.757393
94.75 62.316546
94.8 61.869517
94.85 61.416161
94.9 60.956326
94.95 60.489859
95 60.016599
95.05 59.536381
95.1 59.049035
95.15 58.554387
95.2 58.052256
95.25 57.542454
95.3 57.024789
95.35 56.499064
95.4 55.965071
95.45 55.4226
95.5 54.871432
95.55 54.31134
95.6 53.74209
95.65 53.163443
95.7 52.575146
95.75 51.976944
95.8 51.368567
95.85 50.749742
95.9 50.12018
95.95 49.479587
96 48.827657
96.05 48.164072
96.1 47.488504
96.15 46.800612
96.2 46.100043
96.25 45.386432
96.3 44.6594
96.35 43.918552
96.4 43.16348
96.45 42.39376
96.5 41.608952
96.55 40.808597
96.6 39.992221
96.65 39.159328
96.7 38.309403
96.75 37.441912
96.8 36.556295
96.85 35.651973
96.9 34.728337
96.95 33.784757
97 32.820572
97.05 31.835092
97.1 30.827598
97.15 29.797335
97.2 28.743514
97.25 27.66531
97.3 26.561854
97.35 25.432237
97.4 24.275504
97.45 23.09065
97.5 21.876617
97.55 20.632292
97.6 19.356499
97.65 18.047997
97.7 16.705475
97.75 15.327545
97.8 13.912736
97.85 12.459489
97.9 10.966147
97.95 9.4309502
98 7.8520256
98.05 6.2273781
98.1 4.5548814
98.15 2.8322671
98.2 1.0571145
98.25 -0.77316088
98.3 -2.6613185
98.35 -4.6103039
98.4 -6.6232589
98.45 -8.7035315
98.5 -10.854683
98.55 -13.080493
98.6 -15.384959
98.65 -17.772292
98.7 -20.246901
98.75 -22.81337
98.8 -25.476421
98.85 -28.240854
98.9 -31.111476
98.95 -34.092991
99 -37.189866
99.05 -40.406164
99.1 -43.74533
99.15 -47.20994
99.2 -50.801419
99.25 -54.519717
99.3 -58.362979
99.35 -62.327215
99.4 -66.406005
99.45 -70.590278
99.5 -74.868203
99.55 -79.225224
99.6 -83.644278
99.65 -88.106195
99.7 -92.590277
99.75 -97.075005
99.8 -101.53883
99.85 -105.96097
99.9 -110.32212
99.95 -114.60505
100 -118.79501
100.05 -122.87999
100.1 -126.85074
100.15 -130.70071
100.2 -134.42577
100.25 -138.02399
100.3 -141.49529
100.35 -144.84107
100.4 -148.06395
100.45 -151.16742
100.5 -154.15563
100.55 -157.03313
100.6 -159.80476
100.65 -162.47544
100.7 -165.05011
100.75 -167.53363
100.8 -169.93073
100.85 -172.24596
100.9 -174.48368
100.95 -176.64804
101 -178.74294
101.05 -180.77208
101.1 -182.73896
101.15 -184.64683
101.2 -186.49877
101.25 -188.29765
101.3 -190.04617
101.35 -191.74686
101.4 -193.40209
101.45 -195.01409
101.5 -196.58495
101.55 -198.11662
101.6 -199.61096
101.65 -201.0697
101.7 -202.49447
101.75 -203.88684
101.8 -205.24824
101.85 -206.58006
101.9 -207.88362
101.95 -209.16014
102 -210.4108
102.05 -211.63672
102.1 -212.83895
102.15 -214.01852
102.2 -215.17639
102.25 -216.31347
102.3 -217.43065
102.35 -218.52877
102.4 -219.60863
102.45 -220.67101
102.5 -221.71665
102.55 -222.74627
102.6 -223.76054
102.65 -224.76013
102.7 -225.74568
102.75 -226.71781
102.8 -227.67709
102.85 -228.62411
102.9 -229.55943
102.95 -230.48358
103 -231.39708
103.05 -232.30043
103.1 -233.19414
103.15 -234.07868
103.2 -234.95452
103.25 -235.8221
103.3 -236.68188
103.35 -237.53428
103.4 -238.37974
103.45 -239.21866
103.5 -240.05145
103.55 -240.87852
103.6 -241.70024
103.65 -242.51702
103.7 -243.32923
103.75 -244.13724
103.8 -244.94142
103.85 -245.74215
103.9 -246.53977
103.95 -247.33466
104 -248.12716
104.05 -248.91763
104.1 -249.70641
104.15 -250.49387
104.2 -251.28035
104.25 -252.0662
104.3 -252.85176
104.35 -253.63739
104.4 -254.42344
104.45 -255.21025
104.5 -255.99818
104.55 -256.78758
104.6 -257.57882
104.65 -258.37225
104.7 -259.16824
104.75 -259.96716
104.8 -260.76937
104.85 -261.57527
104.9 -262.38522
104.95 -263.19963
105 -264.01888
105.05 -264.84339
105.1 -265.67356
105.15 -266.50981
105.2 -267.35257
105.25 -268.20229
105.3 -269.0594
105.35 -269.92437
105.4 -270.79767
105.45 -271.67978
105.5 -272.5712
105.55 -273.47244
105.6 -274.38402
105.65 -275.30648
105.7 -276.24039
105.75 -277.18632
105.8 -278.14486
105.85 -279.11662
105.9 -280.10225
105.95 -281.10239
106 -282.11774
106.05 -283.14899
106.1 -284.19689
106.15 -285.2622
106.2 -286.34571
106.25 -287.44826
106.3 -288.57071
106.35 -289.71398
106.4 -290.87901
106.45 -292.06681
106.5 -293.27842
106.55 -294.51495
106.6 -295.77757
106.65 -297.06752
106.7 -298.38613
106.75 -299.7348
106.8 -301.11502
106.85 -302.52843
106.9 -303.97676
106.95 -305.4619
107 -306.98589
107.05 -308.55099
107.1 -310.15965
107.15 -311.8146
107.2 -313.51887
107.25 -315.27581
107.3 -317.08924
107.35 -318.96344
107.4 -320.90329
107.45 -322.91437
107.5 -325.0031
107.55 -327.17692
107.6 -329.4445
107.65 -331.816
107.7 -334.30338
107.75 -336.92084
107.8 -339.68523
107.85 -342.61674
107.9 -345.73954
107.95 -349.08272
108 -352.68117
108.05 -356.57672
108.1 -360.81908
108.15 -365.46644
108.2 -370.58518
108.25 -376.2475
108.3 -382.52556
108.35 -389.47987
108.4 -397.1403
108.45 -405.48057
108.5 -414.39298
108.55 -423.67789
108.6 -433.06302
108.65 -442.25419
108.7 -450.99658
108.75 -459.11739
108.8 -466.53523
108.85 -473.24341
108.9 -479.28348
108.95 -484.72122
109 -489.62993
109.05 -494.08074
109.1 -498.13797
109.15 -501.85755
109.2 -505.28706
109.25 -508.46643
109.3 -511.42904
109.35 -514.2027
109.4 -516.81062
109.45 -519.27221
109.5 -521.60376
109.55 -523.81903
109.6 -525.92968
109.65 -527.94562
109.7 -529.87539
109.75 -531.72633
109.8 -533.50478
109.85 -535.21631
109.9 -536.86578
109.95 -538.45749
110 -539.99524
110.05 -541.48241
110.1 -542.92206
110.15 -544.31693
110.2 -545.66948
110.25 -546.98198
110.3 -548.25648
110.35 -549.49486
110.4 -550.69887
110.45 -551.8701
110.5 -553.01004
110.55 -554.12007
110.6 -555.20148
110.65 -556.25548
110.7 -557.28318
110.75 -558.28566
110.8 -559.26391
110.85 -560.21886
110.9 -561.15141
110.95 -562.0624
111 -562.95263
111.05 -563.82286
111.1 -564.67379
111.15 -565.50613
111.2 -566.32051
111.25 -567.11757
111.3 -567.89789
111.35 -568.66204
111.4 -569.41056
111.45 -570.14398
111.5 -570.86277
111.55 -571.56743
111.6 -572.2584
111.65 -572.93612
111.7 -573.60101
111.75 -574.25347
111.8 -574.89389
111.85 -575.52263
111.9 -576.14005
111.95 -576.7465
112 -577.3423
112.05 -577.92776
112.1 -578.50321
112.15 -579.06892
112.2 -579.62517
112.25 -580.17225
112.3 -580.71042
112.35 -581.23991
112.4 -581.76099
112.45 -582.27389
112.5 -582.77882
112.55 -583.27602
112.6 -583.76568
112.65 -584.24802
112.7 -584.72324
112.75 -585.19151
112.8 -585.65304
112.85 -586.10798
112.9 -586.55652
112.95 -586.99882
113 -587.43504
113.05 -587.86534
113.1 -588.28987
113.15 -588.70877
113.2 -589.12218
113.25 -589.53024
113.3 -589.93308
113.35 -590.33083
113.4 -590.72362
113.45 -591.11155
113.5 -591.49476
113.55 -591.87334
113.6 -592.24742
113.65 -592.61709
113.7 -592.98247
113.75 -593.34364
113.8 -593.7007
113.85 -594.05376
113.9 -594.4029
113.95 -594.74821
114 -595.08977
114.05 -595.42767
114.1 -595.76199
114.15 -596.09281
114.2 -596.4202
114.25 -596.74424
114.3 -597.06501
114.35 -597.38257
114.4 -597.69698
114.45 -598.00833
114.5 -598.31666
114.55 -598.62205
114.6 -598.92456
114.65 -599.22424
114.7 -599.52115
114.75 -599.81535
114.8 -600.1069
114.85 -600.39585
114.9 -600.68224
114.95 -600.96614
115 -601.24759
115.05 -601.52664
115.1 -601.80333
115.15 -602.07772
115.2 -602.34984
115.25 -602.61975
115.3 -602.88747
115.35 -603.15307
115.4 -603.41656
115.45 -603.678
115.5 -603.93742
115.55 -604.19487
115.6 -604.45037
115.65 -604.70396
115.7 -604.95568
115.75 -605.20557
115.8 -605.45365
115.85 -605.69996
115.9 -605.94452
115.95 -606.18738
116 -606.42856
116.05 -606.66809
116.1 -606.906
116.15 -607.14232
116.2 -607.37708
116.25 -607.6103
116.3 -607.84201
116.35 -608.07223
116.4 -608.301
116.45 -608.52833
116.5 -608.75425
116.55 -608.97879
116.6 -609.20196
116.65 -609.42379
116.7 -609.64431
116.75 -609.86353
116.8 -610.08148
116.85 -610.29817
116.9 -610.51363
116.95 -610.72787
117 -610.94092
117.05 -611.1528
117.1 -611.36352
117.15 -611.57311
117.2 -611.78158
117.25 -611.98894
117.3 -612.19522
117.35 -612.40044
117.4 -612.6046
117.45 -612.80773
117.5 -613.00984
117.55 -613.21096
117.6 -613.41108
117.65 -613.61023
117.7 -613.80843
117.75 -614.00568
117.8 -614.20201
117.85 -614.39742
117.9 -614.59194
117.95 -614.78556
118 -614.97832
118.05 -615.17021
118.1 -615.36126
118.15 -615.55147
118.2 -615.74086
118.25 -615.92943
118.3 -616.11721
118.35 -616.3042
118.4 -616.49042
118.45 -616.67587
118.5 -616.86057
118.55 -617.04453
118.6 -617.22775
118.65 -617.41025
118.7 -617.59204
118.75 -617.77313
118.8 -617.95353
118.85 -618.13325
118.9 -618.3123
118.95 -618.49068
119 -618.66841
119.05 -618.84549
119.1 -619.02194
119.15 -619.19777
119.2 -619.37298
119.25 -619.54757
119.3 -619.72157
119.35 -619.89497
119.4 -620.06779
119.45 -620.24004
119.5 -620.41171
119.55 -620.58282
119.6 -620.75338
119.65 -620.9234
119.7 -621.09287
119.75 -621.26182
119.8 -621.43024
119.85 -621.59814
119.9 -621.76553
119.95 -621.93242
120 -622.09881
120.05 -622.26471
120.1 -622.43013
120.15 -622.59507
120.2 -622.75954
120.25 -622.92354
120.3 -623.08709
120.35 -623.25018
120.4 -623.41282
120.45 -623.57503
120.5 -623.7368
120.55 -623.89813
120.6 -624.05905
120.65 -624.21954
120.7 -624.37962
120.75 -624.5393
120.8 -624.69857
120.85 -624.85744
120.9 -625.01592
120.95 -625.17401
121 -625.33172
121.05 -625.48905
121.1 -625.64601
121.15 -625.8026
121.2 -625.95882
121.25 -626.11469
121.3 -626.2702
121.35 -626.42536
121.4 -626.58018
121.45 -626.73465
121.5 -626.88879
121.55 -627.0426
121.6 -627.19607
121.65 -627.34922
121.7 -627.50205
121.75 -627.65457
121.8 -627.80677
121.85 -627.95866
121.9 -628.11025
121.95 -628.26154
122 -628.41253
122.05 -628.56322
122.1 -628.71363
122.15 -628.86375
122.2 -629.01358
122.25 -629.16314
122.3 -629.31242
122.35 -629.46142
122.4 -629.61016
122.45 -629.75864
122.5 -629.90684
122.55 -630.05479
122.6 -630.20249
122.65 -630.34993
122.7 -630.49712
122.75 -630.64406
122.8 -630.79076
122.85 -630.93722
122.9 -631.08344
122.95 -631.22942
123 -631.37517
123.05 -631.5207
123.1 -631.66599
123.15 -631.81107
123.2 -631.95592
123.25 -632.10055
123.3 -632.24497
123.35 -632.38917
123.4 -632.53316
123.45 -632.67695
123.5 -632.82052
123.55 -632.9639
123.6 -633.10708
123.65 -633.25005
123.7 -633.39283
123.75 -633.53542
123.8 -633.67782
123.85 -633.82003
123.9 -633.96205
123.95 -634.10389
124 -634.24554
124.05 -634.38702
124.1 -634.52832
124.15 -634.66944
124.2 -634.81039
124.25 -634.95117
124.3 -635.09178
124.35 -635.23223
124.4 -635.37251
124.45 -635.51262
124.5 -635.65258
124.55 -635.79237
124.6 -635.93201
124.65 -636.07149
124.7 -636.21083
124.75 -636.35001
124.8 -636.48904
124.85 -636.62792
124.9 -636.76665
124.95 -636.90525
125 -637.0437
125.05 -637.18201
125.1 -637.32018
125.15 -637.45821
125.2 -637.59611
125.25 -637.73388
125.3 -637.87151
125.35 -638.00901
125.4 -638.14639
125.45 -638.28364
125.5 -638.42076
125.55 -638.55776
125.6 -638.69463
125.65 -638.83139
125.7 -638.96802
125.75 -639.10454
125.8 -639.24094
125.85 -639.37722
125.9 -639.5134
125.95 -639.64946
126 -639.7854
126.05 -639.92124
126.1 -640.05698
126.15 -640.1926
126.2 -640.32812
126.25 -640.46354
126.3 -640.59885
126.35 -640.73407
126.4 -640.86918
126.45 -641.00419
126.5 -641.13911
126.55 -641.27393
126.6 -641.40866
126.65 -641.54329
126.7 -641.67783
126.75 -641.81228
126.8 -641.94664
126.85 -642.08091
126.9 -642.21509
126.95 -642.34918
127 -642.48319
127.05 -642.61712
127.1 -642.75096
127.15 -642.88472
127.2 -643.0184
127.25 -643.152
127.3 -643.28552
127.35 -643.41896
127.4 -643.55233
127.45 -643.68562
127.5 -643.81883
127.55 -643.95198
127.6 -644.08505
127.65 -644.21804
127.7 -644.35097
127.75 -644.48383
127.8 -644.61661
127.85 -644.74933
127.9 -644.88199
127.95 -645.01457
128 -645.1471
128.05 -645.27956
128.1 -645.41195
128.15 -645.54428
128.2 -645.67655
128.25 -645.80876
128.3 -645.94091
128.35 -646.07301
128.4 -646.20504
128.45 -646.33701
128.5 -646.46893
128.55 -646.6008
128.6 -646.73261
128.65 -646.86436
128.7 -646.99607
128.75 -647.12772
128.8 -647.25931
128.85 -647.39086
128.9 -647.52236
128.95 -647.65381
129 -647.7852
129.05 -647.91656
129.1 -648.04786
129.15 -648.17912
129.2 -648.31033
129.25 -648.4415
129.3 -648.57262
129.35 -648.7037
129.4 -648.83473
129.45 -648.96573
129.5 -649.09668
129.55 -649.22759
129.6 -649.35846
129.65 -649.48929
129.7 -649.62008
129.75 -649.75084
129.8 -649.88155
129.85 -650.01223
129.9 -650.14287
129.95 -650.27348
130 -650.40405
130.05 -650.53458
130.1 -650.66509
130.15 -650.79555
130.2 -650.92599
130.25 -651.05639
130.3 -651.18676
130.35 -651.3171
130.4 -651.44741
130.45 -651.57769
130.5 -651.70794
130.55 -651.83816
130.6 -651.96835
130.65 -652.09851
130.7 -652.22865
130.75 -652.35875
130.8 -652.48884
130.85 -652.61889
130.9 -652.74892
130.95 -652.87893
131 -653.00891
131.05 -653.13886
131.1 -653.26879
131.15 -653.3987
131.2 -653.52859
131.25 -653.65845
131.3 -653.7883
131.35 -653.91812
131.4 -654.04792
131.45 -654.17769
131.5 -654.30745
131.55 -654.43719
131.6 -654.56691
131.65 -654.69661
131.7 -654.8263
131.75 -654.95596
131.8 -655.08561
131.85 -655.21524
131.9 -655.34485
131.95 -655.47445
132 -655.60403
132.05 -655.73359
132.1 -655.86314
132.15 -655.99268
132.2 -656.1222
132.25 -656.2517
132.3 -656.38119
132.35 -656.51067
132.4 -656.64014
132.45 -656.76959
132.5 -656.89903
132.55 -657.02845
132.6 -657.15787
132.65 -657.28727
132.7 -657.41667
132.75 -657.54605
132.8 -657.67542
132.85 -657.80478
132.9 -657.93413
132.95 -658.06347
133 -658.19281
133.05 -658.32213
133.1 -658.45144
133.15 -658.58075
133.2 -658.71005
133.25 -658.83934
133.3 -658.96862
133.35 -659.09789
133.4 -659.22716
133.45 -659.35642
133.5 -659.48568
133.55 -659.61493
133.6 -659.74417
133.65 -659.8734
133.7 -660.00264
133.75 -660.13186
133.8 -660.26108
133.85 -660.3903
133.9 -660.51951
133.95 -660.64871
134 -660.77792
134.05 -660.90711
134.1 -661.03631
134.15 -661.1655
134.2 -661.29469
134.25 -661.42387
134.3 -661.55306
134.35 -661.68224
134.4 -661.81141
134.45 -661.94059
134.5 -662.06976
134.55 -662.19893
134.6 -662.3281
134.65 -662.45727
134.7 -662.58643
134.75 -662.7156
134.8 -662.84476
134.85 -662.97393
134.9 -663.10309
134.95 -663.23225
135 -663.36142
135.05 -663.49058
135.1 -663.61974
135.15 -663.7489
135.2 -663.87807
135.25 -664.00723
135.3 -664.1364
135.35 -664.26556
135.4 -664.39473
135.45 -664.52389
135.5 -664.65306
135.55 -664.78223
135.6 -664.9114
135.65 -665.04058
135.7 -665.16975
135.75 -665.29893
135.8 -665.42811
135.85 -665.55729
135.9 -665.68647
135.95 -665.81565
136 -665.94484
136.05 -666.07403
136.1 -666.20323
136.15 -666.33242
136.2 -666.46162
136.25 -666.59082
136.3 -666.72003
136.35 -666.84923
136.4 -666.97845
136.45 -667.10766
136.5 -667.23688
136.55 -667.3661
136.6 -667.49533
136.65 -667.62455
136.7 -667.75379
136.75 -667.88302
136.8 -668.01226
136.85 -668.14151
136.9 -668.27076
136.95 -668.40001
137 -668.52927
137.05 -668.65853
137.1 -668.78779
137.15 -668.91706
137.2 -669.04634
137.25 -669.17562
137.3 -669.3049
137.35 -669.43419
137.4 -669.56348
137.45 -669.69278
137.5 -669.82208
137.55 -669.95139
137.6 -670.0807
137.65 -670.21001
137.7 -670.33934
137.75 -670.46866
137.8 -670.59799
137.85 -670.72733
137.9 -670.85667
137.95 -670.98602
138 -671.11537
138.05 -671.24472
138.1 -671.37408
138.15 -671.50345
138.2 -671.63282
138.25 -671.7622
138.3 -671.89158
138.35 -672.02097
138.4 -672.15036
138.45 -672.27976
138.5 -672.40916
138.55 -672.53857
138.6 -672.66798
138.65 -672.7974
138.7 -672.92682
138.75 -673.05625
138.8 -673.18568
138.85 -673.31512
138.9 -673.44456
138.95 -673.57401
139 -673.70347
139.05 -673.83292
139.1 -673.96239
139.15 -674.09186
139.2 -674.22133
139.25 -674.35081
139.3 -674.48029
139.35 -674.60978
139.4 -674.73928
139.45 -674.86878
139.5 -674.99828
139.55 -675.12779
139.6 -675.2573
139.65 -675.38682
139.7 -675.51634
[truncated: 1,009 more rows]
