# Supplementary material
Source: publisher figshare collection journal article supplement (https://frontiersin.figshare.com/ndownloader/files/24979811)
Supplement: Supplementary file 1 [file 24979811 › datasheet/affect of wring scheme/C.csv]

Frequency / GHz SZmax(2)	Zmax(2) (a=3.1)/arg	degrees
----------------------------------------------------------------------
90 95.089981
90.05 94.97101
90.1 94.851624
90.15 94.73182
90.2 94.611594
90.25 94.490941
90.3 94.36986
90.35 94.248346
90.4 94.126395
90.45 94.004004
90.5 93.881169
90.55 93.757886
90.6 93.634152
90.65 93.509963
90.7 93.385314
90.75 93.260201
90.8 93.134622
90.85 93.008571
90.9 92.882044
90.95 92.755037
91 92.627547
91.05 92.499568
91.1 92.371096
91.15 92.242128
91.2 92.112658
91.25 91.982682
91.3 91.852195
91.35 91.721193
91.4 91.589671
91.45 91.457624
91.5 91.325048
91.55 91.191937
91.6 91.058287
91.65 90.924093
91.7 90.789349
91.75 90.654051
91.8 90.518192
91.85 90.381769
91.9 90.244775
91.95 90.107205
92 89.969054
92.05 89.830315
92.1 89.690984
92.15 89.551055
92.2 89.410521
92.25 89.269377
92.3 89.127617
92.35 88.985234
92.4 88.842223
92.45 88.698578
92.5 88.554292
92.55 88.409358
92.6 88.26377
92.65 88.117522
92.7 87.970607
92.75 87.823018
92.8 87.674748
92.85 87.52579
92.9 87.376136
92.95 87.225781
93 87.074717
93.05 86.922935
93.1 86.770429
93.15 86.617191
93.2 86.463213
93.25 86.308487
93.3 86.153006
93.35 85.996761
93.4 85.839744
93.45 85.681946
93.5 85.52336
93.55 85.363976
93.6 85.203786
93.65 85.04278
93.7 84.880951
93.75 84.718288
93.8 84.554783
93.85 84.390426
93.9 84.225207
93.95 84.059116
94 83.892145
94.05 83.724281
94.1 83.555517
94.15 83.38584
94.2 83.21524
94.25 83.043708
94.3 82.871231
94.35 82.697799
94.4 82.5234
94.45 82.348023
94.5 82.171656
94.55 81.994288
94.6 81.815907
94.65 81.636499
94.7 81.456053
94.75 81.274557
94.8 81.091996
94.85 80.908359
94.9 80.723631
94.95 80.5378
95 80.350851
95.05 80.16277
95.1 79.973544
95.15 79.783157
95.2 79.591596
95.25 79.398844
95.3 79.204886
95.35 79.009708
95.4 78.813292
95.45 78.615624
95.5 78.416686
95.55 78.216462
95.6 78.014935
95.65 77.812087
95.7 77.607901
95.75 77.402359
95.8 77.195442
95.85 76.987132
95.9 76.77741
95.95 76.566256
96 76.35365
96.05 76.139574
96.1 75.924005
96.15 75.706923
96.2 75.488308
96.25 75.268136
96.3 75.046386
96.35 74.823036
96.4 74.598062
96.45 74.371442
96.5 74.14315
96.55 73.913163
96.6 73.681456
96.65 73.448003
96.7 73.212779
96.75 72.975757
96.8 72.73691
96.85 72.49621
96.9 72.25363
96.95 72.009141
97 71.762714
97.05 71.514319
97.1 71.263925
97.15 71.011501
97.2 70.757015
97.25 70.500435
97.3 70.241729
97.35 69.980861
97.4 69.717797
97.45 69.452503
97.5 69.184941
97.55 68.915075
97.6 68.642868
97.65 68.36828
97.7 68.091273
97.75 67.811806
97.8 67.529837
97.85 67.245325
97.9 66.958227
97.95 66.668499
98 66.376095
98.05 66.080969
98.1 65.783075
98.15 65.482363
98.2 65.178785
98.25 64.872291
98.3 64.562827
98.35 64.250342
98.4 63.934781
98.45 63.616089
98.5 63.294208
98.55 62.969081
98.6 62.640648
98.65 62.308847
98.7 61.973616
98.75 61.634892
98.8 61.292607
98.85 60.946695
98.9 60.597086
98.95 60.24371
99 59.886495
99.05 59.525365
99.1 59.160244
99.15 58.791054
99.2 58.417714
99.25 58.040142
99.3 57.658253
99.35 57.271961
99.4 56.881175
99.45 56.485805
99.5 56.085757
99.55 55.680933
99.6 55.271236
99.65 54.856562
99.7 54.436807
99.75 54.011865
99.8 53.581623
99.85 53.145969
99.9 52.704786
99.95 52.257955
100 51.80535
100.05 51.346846
100.1 50.882313
100.15 50.411615
100.2 49.934615
100.25 49.45117
100.3 48.961134
100.35 48.464357
100.4 47.960684
100.45 47.449954
100.5 46.932003
100.55 46.406663
100.6 45.873758
100.65 45.333108
100.7 44.784529
100.75 44.227829
100.8 43.662812
100.85 43.089274
100.9 42.507006
100.95 41.915792
101 41.315408
101.05 40.705626
101.1 40.086208
101.15 39.456909
101.2 38.817475
101.25 38.167646
101.3 37.507151
101.35 36.835712
101.4 36.153041
101.45 35.458839
101.5 34.752799
101.55 34.034603
101.6 33.30392
101.65 32.56041
101.7 31.80372
101.75 31.033485
101.8 30.249327
101.85 29.450854
101.9 28.637659
101.95 27.809323
102 26.965409
102.05 26.105465
102.1 25.22902
102.15 24.335589
102.2 23.424664
102.25 22.49572
102.3 21.548212
102.35 20.581572
102.4 19.595208
102.45 18.588508
102.5 17.56083
102.55 16.511509
102.6 15.439852
102.65 14.345133
102.7 13.226599
102.75 12.08346
102.8 10.914895
102.85 9.7200433
102.9 8.498006
102.95 7.2478428
103 5.9685694
103.05 4.6591549
103.1 3.3185194
103.15 1.9455304
103.2 0.53900031
103.25 -0.90231721
103.3 -2.3797304
103.35 -3.8946129
103.4 -5.4484074
103.45 -7.0426294
103.5 -8.6788703
103.55 -10.358801
103.6 -12.084177
103.65 -13.856836
103.7 -15.678708
103.75 -17.55181
103.8 -19.478251
103.85 -21.460226
103.9 -23.500022
103.95 -25.600004
104 -27.762611
104.05 -29.990346
104.1 -32.285758
104.15 -34.651421
104.2 -37.089905
104.25 -39.603743
104.3 -42.195388
104.35 -44.867154
104.4 -47.621157
104.45 -50.459237
104.5 -53.382869
104.55 -56.393067
104.6 -59.490271
104.65 -62.674235
104.7 -65.9439
104.75 -69.297281
104.8 -72.731353
104.85 -76.241959
104.9 -79.823742
104.95 -83.470114
105 -87.17327
105.05 -90.924252
105.1 -94.713075
105.15 -98.528893
105.2 -102.36023
105.25 -106.19525
105.3 -110.02201
105.35 -113.8288
105.4 -117.60436
105.45 -121.3382
105.5 -125.02073
105.55 -128.64348
105.6 -132.19916
105.65 -135.68171
105.7 -139.08632
105.75 -142.40933
105.8 -145.64822
105.85 -148.80146
105.9 -151.8684
105.95 -154.84917
106 -157.74454
106.05 -160.55581
106.1 -163.2847
106.15 -165.93328
106.2 -168.50385
106.25 -170.99888
106.3 -173.42098
106.35 -175.7728
106.4 -178.05701
106.45 -180.27629
106.5 -182.43326
106.55 -184.53052
106.6 -186.57056
106.65 -188.55582
106.7 -190.48864
106.75 -192.37128
106.8 -194.20589
106.85 -195.99454
106.9 -197.73921
106.95 -199.44178
107 -201.10405
107.05 -202.72774
107.1 -204.31448
107.15 -205.86582
107.2 -207.38325
107.25 -208.86818
107.3 -210.32195
107.35 -211.74586
107.4 -213.14111
107.45 -214.50889
107.5 -215.8503
107.55 -217.16642
107.6 -218.45826
107.65 -219.7268
107.7 -220.97297
107.75 -222.19766
107.8 -223.40175
107.85 -224.58604
107.9 -225.75133
107.95 -226.89838
108 -228.02792
108.05 -229.14066
108.1 -230.23726
108.15 -231.3184
108.2 -232.38469
108.25 -233.43675
108.3 -234.47517
108.35 -235.50051
108.4 -236.51332
108.45 -237.51415
108.5 -238.5035
108.55 -239.48188
108.6 -240.44978
108.65 -241.40767
108.7 -242.35601
108.75 -243.29526
108.8 -244.22584
108.85 -245.14819
108.9 -246.06272
108.95 -246.96985
109 -247.86996
109.05 -248.76345
109.1 -249.6507
109.15 -250.53208
109.2 -251.40796
109.25 -252.27871
109.3 -253.14467
109.35 -254.00621
109.4 -254.86365
109.45 -255.71734
109.5 -256.56763
109.55 -257.41483
109.6 -258.25928
109.65 -259.10131
109.7 -259.94123
109.75 -260.77937
109.8 -261.61605
109.85 -262.45157
109.9 -263.28627
109.95 -264.12045
110 -264.95443
110.05 -265.78852
110.1 -266.62304
110.15 -267.4583
110.2 -268.29461
110.25 -269.1323
110.3 -269.97169
110.35 -270.81309
110.4 -271.65682
110.45 -272.50322
110.5 -273.35261
110.55 -274.20532
110.6 -275.06169
110.65 -275.92206
110.7 -276.78678
110.75 -277.65619
110.8 -278.53064
110.85 -279.41051
110.9 -280.29615
110.95 -281.18795
111 -282.08628
111.05 -282.99153
111.1 -283.90409
111.15 -284.82439
111.2 -285.75282
111.25 -286.68982
111.3 -287.63582
111.35 -288.59127
111.4 -289.55663
111.45 -290.53238
111.5 -291.51899
111.55 -292.51696
111.6 -293.52682
111.65 -294.54908
111.7 -295.58431
111.75 -296.63306
111.8 -297.69592
111.85 -298.77349
111.9 -299.86641
111.95 -300.97531
112 -302.10088
112.05 -303.24381
112.1 -304.40483
112.15 -305.58471
112.2 -306.78421
112.25 -308.00418
112.3 -309.24547
112.35 -310.50898
112.4 -311.79564
112.45 -313.10645
112.5 -314.44243
112.55 -315.80468
112.6 -317.19433
112.65 -318.6126
112.7 -320.06075
112.75 -321.54012
112.8 -323.05215
112.85 -324.59833
112.9 -326.18026
112.95 -327.79966
113 -329.45832
113.05 -331.15819
113.1 -332.90131
113.15 -334.68991
113.2 -336.52632
113.25 -338.41309
113.3 -340.35292
113.35 -342.3487
113.4 -344.40356
113.45 -346.52083
113.5 -348.7041
113.55 -350.95718
113.6 -353.28416
113.65 -355.68941
113.7 -358.17755
113.75 -360.75345
113.8 -363.42223
113.85 -366.18922
113.9 -369.05988
113.95 -372.03977
114 -375.13436
114.05 -378.34898
114.1 -381.68854
114.15 -385.15734
114.2 -388.75876
114.25 -392.49489
114.3 -396.36619
114.35 -400.37103
114.4 -404.50529
114.45 -408.76198
114.5 -413.13098
114.55 -417.59882
114.6 -422.14883
114.65 -426.76132
114.7 -431.41419
114.75 -436.08361
114.8 -440.745
114.85 -445.37397
114.9 -449.94731
114.95 -454.44387
115 -458.84519
115.05 -463.13596
115.1 -467.30417
115.15 -471.34108
115.2 -475.24102
115.25 -479.00107
115.3 -482.62062
115.35 -486.10098
115.4 -489.44496
115.45 -492.6565
115.5 -495.74034
115.55 -498.70176
115.6 -501.54631
115.65 -504.27969
115.7 -506.90758
115.75 -509.43557
115.8 -511.86906
115.85 -514.21323
115.9 -516.47302
115.95 -518.65307
116 -520.75778
116.05 -522.79126
116.1 -524.75738
116.15 -526.65972
116.2 -528.50166
116.25 -530.28631
116.3 -532.0166
116.35 -533.69526
116.4 -535.32483
116.45 -536.90766
116.5 -538.44598
116.55 -539.94186
116.6 -541.39722
116.65 -542.81388
116.7 -544.19353
116.75 -545.53777
116.8 -546.8481
116.85 -548.12592
116.9 -549.37255
116.95 -550.58925
117 -551.7772
117.05 -552.93751
117.1 -554.07123
117.15 -555.17938
117.2 -556.26288
117.25 -557.32264
117.3 -558.35952
117.35 -559.37432
117.4 -560.36782
117.45 -561.34076
117.5 -562.29383
117.55 -563.22771
117.6 -564.14303
117.65 -565.04041
117.7 -565.92042
117.75 -566.78364
117.8 -567.63059
117.85 -568.46179
117.9 -569.27773
117.95 -570.07889
118 -570.8657
118.05 -571.63862
118.1 -572.39806
118.15 -573.14441
118.2 -573.87808
118.25 -574.59942
118.3 -575.30881
118.35 -576.00657
118.4 -576.69306
118.45 -577.36857
118.5 -578.03344
118.55 -578.68795
118.6 -579.33239
118.65 -579.96704
118.7 -580.59217
118.75 -581.20804
118.8 -581.8149
118.85 -582.41299
118.9 -583.00255
118.95 -583.5838
119 -584.15697
119.05 -584.72226
119.1 -585.27988
119.15 -585.83004
119.2 -586.37292
119.25 -586.90871
119.3 -587.4376
119.35 -587.95976
119.4 -588.47536
119.45 -588.98457
119.5 -589.48756
119.55 -589.98447
119.6 -590.47546
119.65 -590.96068
119.7 -591.44027
119.75 -591.91437
119.8 -592.38313
119.85 -592.84666
119.9 -593.30512
119.95 -593.7586
120 -594.20726
120.05 -594.65119
120.1 -595.09052
120.15 -595.52537
120.2 -595.95584
120.25 -596.38205
120.3 -596.80409
120.35 -597.22209
120.4 -597.63613
120.45 -598.04632
120.5 -598.45276
120.55 -598.85554
120.6 -599.25476
120.65 -599.6505
120.7 -600.04287
120.75 -600.43195
120.8 -600.81782
120.85 -601.20058
120.9 -601.5803
120.95 -601.95708
121 -602.33099
121.05 -602.70212
121.1 -603.07054
121.15 -603.43633
121.2 -603.79957
121.25 -604.16034
121.3 -604.5187
121.35 -604.87474
121.4 -605.22851
121.45 -605.58009
121.5 -605.92955
121.55 -606.27695
121.6 -606.62235
121.65 -606.9658
121.7 -607.30736
121.75 -607.64707
121.8 -607.98498
121.85 -608.32111
121.9 -608.65549
121.95 -608.98813
122 -609.31904
122.05 -609.64818
122.1 -609.97552
122.15 -610.30099
122.2 -610.62451
122.25 -610.94593
122.3 -611.2651
122.35 -611.58179
122.4 -611.89573
122.45 -612.20658
122.5 -612.51391
122.55 -612.81724
122.6 -613.11597
122.65 -613.40944
122.7 -613.69688
122.75 -613.97744
122.8 -614.25022
122.85 -614.51431
122.9 -614.76879
122.95 -615.01287
123 -615.24592
123.05 -615.46756
123.1 -615.67779
123.15 -615.87704
123.2 -616.06621
123.25 -616.24668
123.3 -616.42026
123.35 -616.58909
123.4 -616.75546
123.45 -616.92166
123.5 -617.08982
123.55 -617.26177
123.6 -617.43896
123.65 -617.62239
123.7 -617.81267
123.75 -618.00999
123.8 -618.21425
123.85 -618.42511
123.9 -618.64205
123.95 -618.86444
124 -619.09158
124.05 -619.32278
124.1 -619.55735
124.15 -619.79461
124.2 -620.03394
124.25 -620.27477
124.3 -620.51656
124.35 -620.75883
124.4 -621.00111
124.45 -621.243
124.5 -621.4841
124.55 -621.72406
124.6 -621.96251
124.65 -622.19913
124.7 -622.43359
124.75 -622.66555
124.8 -622.8947
124.85 -623.12069
124.9 -623.34319
124.95 -623.56184
125 -623.77629
125.05 -623.98614
125.1 -624.19101
125.15 -624.3905
125.2 -624.58417
125.25 -624.7716
125.3 -624.95235
125.35 -625.12598
125.4 -625.29205
125.45 -625.45013
125.5 -625.5998
125.55 -625.74068
125.6 -625.87244
125.65 -625.99478
125.7 -626.10749
125.75 -626.21044
125.8 -626.30358
125.85 -626.38699
125.9 -626.46086
125.95 -626.52555
126 -626.58151
126.05 -626.62938
126.1 -626.66993
126.15 -626.70406
126.2 -626.73279
126.25 -626.75728
126.3 -626.77873
126.35 -626.79842
126.4 -626.81766
126.45 -626.83775
126.5 -626.85995
126.55 -626.88546
126.6 -626.91539
126.65 -626.95072
126.7 -626.99232
126.75 -627.04092
126.8 -627.09708
126.85 -627.16123
126.9 -627.23367
126.95 -627.31454
127 -627.40387
127.05 -627.50158
127.1 -627.60749
127.15 -627.72135
127.2 -627.84285
127.25 -627.97161
127.3 -628.10723
127.35 -628.24928
127.4 -628.39733
127.45 -628.55092
127.5 -628.70962
127.55 -628.87298
127.6 -629.04058
127.65 -629.21202
127.7 -629.38691
127.75 -629.56489
127.8 -629.74561
127.85 -629.92876
127.9 -630.11404
127.95 -630.30117
128 -630.48991
128.05 -630.68002
128.1 -630.87128
128.15 -631.06351
128.2 -631.25653
128.25 -631.45019
128.3 -631.64433
128.35 -631.83883
128.4 -632.03357
128.45 -632.22845
128.5 -632.42337
128.55 -632.61825
128.6 -632.81302
128.65 -633.0076
128.7 -633.20195
128.75 -633.396
128.8 -633.58972
128.85 -633.78305
128.9 -633.97598
128.95 -634.16846
129 -634.36047
129.05 -634.55199
129.1 -634.743
129.15 -634.93349
129.2 -635.12343
129.25 -635.31281
129.3 -635.50164
129.35 -635.6899
129.4 -635.87758
129.45 -636.06469
129.5 -636.25122
129.55 -636.43716
129.6 -636.62253
129.65 -636.80731
129.7 -636.99152
129.75 -637.17515
129.8 -637.3582
129.85 -637.54068
129.9 -637.7226
129.95 -637.90396
130 -638.08476
130.05 -638.26502
130.1 -638.44472
130.15 -638.62389
130.2 -638.80252
130.25 -638.98063
130.3 -639.15821
130.35 -639.33528
130.4 -639.51185
130.45 -639.68791
130.5 -639.86347
130.55 -640.03855
130.6 -640.21315
130.65 -640.38727
130.7 -640.56092
130.75 -640.73412
130.8 -640.90685
130.85 -641.07914
130.9 -641.25099
130.95 -641.4224
131 -641.59339
131.05 -641.76395
131.1 -641.93409
131.15 -642.10382
131.2 -642.27315
131.25 -642.44208
131.3 -642.61062
131.35 -642.77877
131.4 -642.94655
131.45 -643.11394
131.5 -643.28097
131.55 -643.44763
131.6 -643.61394
131.65 -643.77989
131.7 -643.94549
131.75 -644.11076
131.8 -644.27568
131.85 -644.44027
131.9 -644.60453
131.95 -644.76848
132 -644.9321
132.05 -645.09541
132.1 -645.25841
132.15 -645.42111
132.2 -645.58351
132.25 -645.74561
132.3 -645.90742
132.35 -646.06894
132.4 -646.23019
132.45 -646.39115
132.5 -646.55184
132.55 -646.71226
132.6 -646.87241
132.65 -647.0323
132.7 -647.19193
132.75 -647.35131
132.8 -647.51043
132.85 -647.66931
132.9 -647.82794
132.95 -647.98633
133 -648.14449
133.05 -648.3024
133.1 -648.46009
133.15 -648.61755
133.2 -648.77479
133.25 -648.9318
133.3 -649.0886
133.35 -649.24518
133.4 -649.40155
133.45 -649.5577
133.5 -649.71366
133.55 -649.8694
133.6 -650.02495
133.65 -650.1803
133.7 -650.33545
133.75 -650.49041
133.8 -650.64519
133.85 -650.79977
133.9 -650.95417
133.95 -651.10838
134 -651.26242
134.05 -651.41627
134.1 -651.56996
134.15 -651.72347
134.2 -651.8768
134.25 -652.02997
134.3 -652.18298
134.35 -652.33582
134.4 -652.4885
134.45 -652.64102
134.5 -652.79338
134.55 -652.94558
134.6 -653.09764
134.65 -653.24954
134.7 -653.40129
134.75 -653.5529
134.8 -653.70436
134.85 -653.85567
134.9 -654.00685
134.95 -654.15788
135 -654.30878
135.05 -654.45954
135.1 -654.61016
135.15 -654.76066
135.2 -654.91102
135.25 -655.06125
135.3 -655.21136
135.35 -655.36134
135.4 -655.5112
135.45 -655.66093
135.5 -655.81054
135.55 -655.96004
135.6 -656.10941
135.65 -656.25867
135.7 -656.40781
135.75 -656.55684
135.8 -656.70576
135.85 -656.85457
135.9 -657.00327
135.95 -657.15186
136 -657.30035
136.05 -657.44873
136.1 -657.597
136.15 -657.74518
136.2 -657.89325
136.25 -658.04122
136.3 -658.1891
136.35 -658.33688
136.4 -658.48456
136.45 -658.63215
136.5 -658.77965
136.55 -658.92705
136.6 -659.07436
136.65 -659.22158
136.7 -659.36872
136.75 -659.51577
136.8 -659.66273
136.85 -659.8096
136.9 -659.95639
136.95 -660.1031
137 -660.24973
137.05 -660.39627
137.1 -660.54274
137.15 -660.68912
137.2 -660.83543
137.25 -660.98166
137.3 -661.12782
137.35 -661.2739
137.4 -661.41991
137.45 -661.56585
137.5 -661.71171
137.55 -661.8575
137.6 -662.00322
137.65 -662.14888
137.7 -662.29446
137.75 -662.43998
137.8 -662.58543
137.85 -662.73082
137.9 -662.87614
137.95 -663.0214
138 -663.16659
138.05 -663.31172
138.1 -663.45679
138.15 -663.6018
138.2 -663.74675
138.25 -663.89165
138.3 -664.03648
138.35 -664.18126
138.4 -664.32598
138.45 -664.47064
138.5 -664.61525
138.55 -664.75981
138.6 -664.90431
138.65 -665.04876
138.7 -665.19315
138.75 -665.3375
138.8 -665.48179
138.85 -665.62603
138.9 -665.77023
138.95 -665.91438
139 -666.05847
139.05 -666.20252
139.1 -666.34653
139.15 -666.49049
139.2 -666.6344
139.25 -666.77827
139.3 -666.92209
139.35 -667.06587
139.4 -667.20961
139.45 -667.3533
139.5 -667.49695
139.55 -667.64057
139.6 -667.78414
139.65 -667.92767
139.7 -668.07116
139.75 -668.21461
139.8 -668.35803
139.85 -668.5014
139.9 -668.64474
139.95 -668.78804
140 -668.93131
Frequency / GHz SZmax(2)	Zmax(2) (a=3.69)/arg	degrees
----------------------------------------------------------------------
90 88.31685
90.05 88.134234
90.1 87.950394
90.15 87.765314
90.2 87.578976
90.25 87.391364
90.3 87.202458
90.35 87.012241
90.4 86.820693
90.45 86.627797
90.5 86.433531
90.55 86.237877
90.6 86.040814
90.65 85.842322
90.7 85.642379
90.75 85.440964
90.8 85.238055
90.85 85.03363
90.9 84.827666
90.95 84.620139
91 84.411026
91.05 84.200303
91.1 83.987945
91.15 83.773926
91.2 83.558221
91.25 83.340803
91.3 83.121645
91.35 82.90072
91.4 82.678
91.45 82.453456
91.5 82.227059
91.55 81.998778
91.6 81.768584
91.65 81.536444
91.7 81.302327
91.75 81.066199
91.8 80.828029
91.85 80.58778
91.9 80.345419
91.95 80.10091
92 79.854215
92.05 79.605298
92.1 79.35412
92.15 79.100642
92.2 78.844824
92.25 78.586624
92.3 78.326001
92.35 78.062912
92.4 77.797312
92.45 77.529157
92.5 77.2584
92.55 76.984993
92.6 76.70889
92.65 76.430039
92.7 76.148389
92.75 75.86389
92.8 75.576486
92.85 75.286124
92.9 74.992747
92.95 74.696298
93 74.396717
93.05 74.093944
93.1 73.787916
93.15 73.478571
93.2 73.165841
93.25 72.849662
93.3 72.529962
93.35 72.206672
93.4 71.879719
93.45 71.549029
93.5 71.214524
93.55 70.876127
93.6 70.533756
93.65 70.187328
93.7 69.836758
93.75 69.481958
93.8 69.122839
93.85 68.759307
93.9 68.391267
93.95 68.018622
94 67.64127
94.05 67.259108
94.1 66.872029
94.15 66.479924
94.2 66.082679
94.25 65.680178
94.3 65.272302
94.35 64.858927
94.4 64.439926
94.45 64.015169
94.5 63.584521
94.55 63.147842
94.6 62.704991
94.65 62.255818
94.7 61.800173
94.75 61.337899
94.8 60.868833
94.85 60.392809
94.9 59.909655
94.95 59.419193
95 58.92124
95.05 58.415607
95.1 57.902097
95.15 57.38051
95.2 56.850636
95.25 56.312261
95.3 55.765161
95.35 55.209106
95.4 54.643859
95.45 54.069173
95.5 53.484794
95.55 52.890459
95.6 52.285894
95.65 51.670818
95.7 51.044939
95.75 50.407954
95.8 49.759549
95.85 49.099401
95.9 48.427172
95.95 47.742513
96 47.045063
96.05 46.334446
96.1 45.610271
96.15 44.872135
96.2 44.119616
96.25 43.352279
96.3 42.569669
96.35 41.771315
96.4 40.956724
96.45 40.125387
96.5 39.27677
96.55 38.41032
96.6 37.525459
96.65 36.621583
96.7 35.698063
96.75 34.754243
96.8 33.789436
96.85 32.802924
96.9 31.793955
96.95 30.761743
97 29.705462
97.05 28.624246
97.1 27.517186
97.15 26.383326
97.2 25.221661
97.25 24.031131
97.3 22.810617
97.35 21.558939
97.4 20.27485
97.45 18.957027
97.5 17.604071
97.55 16.214494
97.6 14.786715
97.65 13.319053
97.7 11.809715
97.75 10.256785
97.8 8.6582196
97.85 7.0118288
97.9 5.3152677
97.95 3.566021
98 1.7613889
98.05 -0.10152886
98.1 -2.0258493
98.15 -4.0149226
98.2 -6.0723488
98.25 -8.2019938
98.3 -10.408003
98.35 -12.694815
98.4 -15.067163
98.45 -17.530083
98.5 -20.088897
98.55 -22.749193
98.6 -25.516785
98.65 -28.397646
98.7 -31.397815
98.75 -34.523262
98.8 -37.779716
98.85 -41.172423
98.9 -44.705864
98.95 -48.383399
99 -52.206853
99.05 -56.176058
99.1 -60.288369
99.15 -64.538197
99.2 -68.916606
99.25 -73.411037
99.3 -78.00523
99.35 -82.679397
99.4 -87.410677
99.45 -92.173882
99.5 -96.942465
99.55 -101.68964
99.6 -106.38954
99.65 -111.01822
99.7 -115.55457
99.75 -119.98085
99.8 -124.283
99.85 -128.45062
99.9 -132.47686
99.95 -136.35796
100 -140.09287
100.05 -143.68274
100.1 -147.13044
100.15 -150.44016
100.2 -153.61699
100.25 -156.66661
100.3 -159.59505
100.35 -162.40848
100.4 -165.11304
100.45 -167.71476
100.5 -170.21948
100.55 -172.63277
100.6 -174.95991
100.65 -177.2059
100.7 -179.37543
100.75 -181.47289
100.8 -183.50239
100.85 -185.46774
100.9 -187.37253
100.95 -189.22006
101 -191.01344
101.05 -192.75554
101.1 -194.44905
101.15 -196.09647
101.2 -197.70015
101.25 -199.26227
101.3 -200.78487
101.35 -202.26989
101.4 -203.71911
101.45 -205.13422
101.5 -206.51682
101.55 -207.86841
101.6 -209.19039
101.65 -210.48412
101.7 -211.75084
101.75 -212.99176
101.8 -214.20801
101.85 -215.40068
101.9 -216.57079
101.95 -217.71932
102 -218.8472
102.05 -219.95532
102.1 -221.04454
102.15 -222.11566
102.2 -223.16948
102.25 -224.20674
102.3 -225.22815
102.35 -226.23441
102.4 -227.22619
102.45 -228.20413
102.5 -229.16884
102.55 -230.12093
102.6 -231.06096
102.65 -231.9895
102.7 -232.90709
102.75 -233.81425
102.8 -234.7115
102.85 -235.59932
102.9 -236.4782
102.95 -237.3486
103 -238.21099
103.05 -239.0658
103.1 -239.91348
103.15 -240.75445
103.2 -241.58912
103.25 -242.4179
103.3 -243.2412
103.35 -244.05941
103.4 -244.87291
103.45 -245.6821
103.5 -246.48733
103.55 -247.289
103.6 -248.08745
103.65 -248.88307
103.7 -249.6762
103.75 -250.46721
103.8 -251.25646
103.85 -252.04429
103.9 -252.83106
103.95 -253.61712
104 -254.40282
104.05 -255.18852
104.1 -255.97457
104.15 -256.76132
104.2 -257.54912
104.25 -258.33835
104.3 -259.12934
104.35 -259.92247
104.4 -260.71811
104.45 -261.51663
104.5 -262.31839
104.55 -263.12378
104.6 -263.93319
104.65 -264.74701
104.7 -265.56564
104.75 -266.38948
104.8 -267.21896
104.85 -268.05448
104.9 -268.8965
104.95 -269.74544
105 -270.60176
105.05 -271.46594
105.1 -272.33844
105.15 -273.21976
105.2 -274.11041
105.25 -275.0109
105.3 -275.92178
105.35 -276.8436
105.4 -277.77693
105.45 -278.72237
105.5 -279.68053
105.55 -280.65205
105.6 -281.6376
105.65 -282.63786
105.7 -283.65355
105.75 -284.68542
105.8 -285.73425
105.85 -286.80084
105.9 -287.88605
105.95 -288.99077
106 -290.11594
106.05 -291.26253
106.1 -292.43157
106.15 -293.62414
106.2 -294.8414
106.25 -296.08454
106.3 -297.35483
106.35 -298.65363
106.4 -299.98237
106.45 -301.34256
106.5 -302.73583
106.55 -304.1639
106.6 -305.62862
106.65 -307.13199
106.7 -308.67614
106.75 -310.26339
106.8 -311.89626
106.85 -313.5775
106.9 -315.31013
106.95 -317.0975
107 -318.94333
107.05 -320.85181
107.1 -322.82764
107.15 -324.8762
107.2 -327.00365
107.25 -329.21708
107.3 -331.52475
107.35 -333.93628
107.4 -336.46299
107.45 -339.11819
107.5 -341.91767
107.55 -344.88011
107.6 -348.02773
107.65 -351.38687
107.7 -354.98875
107.75 -358.87008
107.8 -363.07361
107.85 -367.64819
107.9 -372.64796
107.95 -378.12985
108 -384.14845
108.05 -390.74687
108.1 -397.94302
108.15 -405.71223
108.2 -413.97064
108.25 -422.56797
108.3 -431.29837
108.35 -439.93147
108.4 -448.25361
108.45 -456.10206
108.5 -463.38006
108.55 -470.05249
108.6 -476.13043
108.65 -481.6534
108.7 -486.67474
108.75 -491.25164
108.8 -495.43929
108.85 -499.28793
108.9 -502.84185
108.95 -506.13925
109 -509.21276
109.05 -512.09005
109.1 -514.79452
109.15 -517.346
109.2 -519.76126
109.25 -522.05459
109.3 -524.23816
109.35 -526.32239
109.4 -528.31626
109.45 -530.22752
109.5 -532.06293
109.55 -533.82836
109.6 -535.52898
109.65 -537.16935
109.7 -538.75351
109.75 -540.28507
109.8 -541.76725
109.85 -543.20294
109.9 -544.59478
109.95 -545.94513
110 -547.25618
110.05 -548.5299
110.1 -549.76812
110.15 -550.97252
110.2 -552.14466
110.25 -553.28597
110.3 -554.39781
110.35 -555.48142
110.4 -556.53798
110.45 -557.5686
110.5 -558.5743
110.55 -559.55607
110.6 -560.51481
110.65 -561.45141
110.7 -562.36668
110.75 -563.26141
110.8 -564.13634
110.85 -564.99218
110.9 -565.82959
110.95 -566.64922
111 -567.45167
111.05 -568.23753
111.1 -569.00736
111.15 -569.76169
111.2 -570.50102
111.25 -571.22585
111.3 -571.93665
111.35 -572.63385
111.4 -573.3179
111.45 -573.9892
111.5 -574.64815
111.55 -575.29514
111.6 -575.93052
111.65 -576.55465
111.7 -577.16787
111.75 -577.7705
111.8 -578.36286
111.85 -578.94525
111.9 -579.51796
111.95 -580.08127
112 -580.63544
112.05 -581.18075
112.1 -581.71744
112.15 -582.24576
112.2 -582.76593
112.25 -583.27818
112.3 -583.78274
112.35 -584.27981
112.4 -584.76959
112.45 -585.25229
112.5 -585.72809
112.55 -586.19718
112.6 -586.65972
112.65 -587.11591
112.7 -587.56589
112.75 -588.00984
112.8 -588.44791
112.85 -588.88025
112.9 -589.307
112.95 -589.72831
113 -590.14431
113.05 -590.55514
113.1 -590.96093
113.15 -591.36179
113.2 -591.75786
113.25 -592.14925
113.3 -592.53608
113.35 -592.91844
113.4 -593.29646
113.45 -593.67024
113.5 -594.03987
113.55 -594.40546
113.6 -594.76711
113.65 -595.12489
113.7 -595.47891
113.75 -595.82926
113.8 -596.17601
113.85 -596.51926
113.9 -596.85907
113.95 -597.19554
114 -597.52874
114.05 -597.85874
114.1 -598.18561
114.15 -598.50943
114.2 -598.83027
114.25 -599.14818
114.3 -599.46324
114.35 -599.77552
114.4 -600.08506
114.45 -600.39194
114.5 -600.69622
114.55 -600.99794
114.6 -601.29717
114.65 -601.59396
114.7 -601.88837
114.75 -602.18044
114.8 -602.47023
114.85 -602.75779
114.9 -603.04317
114.95 -603.3264
115 -603.60755
115.05 -603.88666
115.1 -604.16376
115.15 -604.43891
115.2 -604.71214
115.25 -604.98349
115.3 -605.25301
115.35 -605.52074
115.4 -605.7867
115.45 -606.05095
115.5 -606.31351
115.55 -606.57441
115.6 -606.8337
115.65 -607.09141
115.7 -607.34756
115.75 -607.6022
115.8 -607.85534
115.85 -608.10701
115.9 -608.35725
115.95 -608.60608
116 -608.85353
116.05 -609.09961
116.1 -609.34435
116.15 -609.58777
116.2 -609.8299
116.25 -610.07074
116.3 -610.31031
116.35 -610.54863
116.4 -610.78571
116.45 -611.02156
116.5 -611.25619
116.55 -611.4896
116.6 -611.72178
116.65 -611.95276
116.7 -612.1825
116.75 -612.41102
116.8 -612.6383
116.85 -612.86432
116.9 -613.08905
116.95 -613.31249
117 -613.53459
117.05 -613.75531
117.1 -613.97462
117.15 -614.19246
117.2 -614.40877
117.25 -614.62349
117.3 -614.83654
117.35 -615.04784
117.4 -615.25728
117.45 -615.46476
117.5 -615.67017
117.55 -615.87336
117.6 -616.07419
117.65 -616.27251
117.7 -616.46813
117.75 -616.66086
117.8 -616.85051
117.85 -617.03684
117.9 -617.21963
117.95 -617.39862
118 -617.57355
118.05 -617.74413
118.1 -617.9101
118.15 -618.07114
118.2 -618.22698
118.25 -618.37732
118.3 -618.52188
118.35 -618.66039
118.4 -618.79261
118.45 -618.91832
118.5 -619.03735
118.55 -619.14959
118.6 -619.25497
118.65 -619.3535
118.7 -619.44529
118.75 -619.53051
118.8 -619.60944
118.85 -619.68245
118.9 -619.75001
118.95 -619.81271
119 -619.87119
119.05 -619.92619
119.1 -619.97851
119.15 -620.02902
119.2 -620.07858
119.25 -620.12809
119.3 -620.17842
119.35 -620.23042
119.4 -620.28489
119.45 -620.34253
119.5 -620.404
119.55 -620.46984
119.6 -620.54051
119.65 -620.61636
119.7 -620.69765
119.75 -620.78454
119.8 -620.8771
119.85 -620.97534
119.9 -621.07916
119.95 -621.18845
120 -621.30301
120.05 -621.42262
120.1 -621.54702
120.15 -621.67594
120.2 -621.80909
120.25 -621.94617
120.3 -622.08688
120.35 -622.23092
120.4 -622.37799
120.45 -622.52783
120.5 -622.68016
120.55 -622.83472
120.6 -622.99127
120.65 -623.14959
120.7 -623.30946
120.75 -623.47069
120.8 -623.6331
120.85 -623.79651
120.9 -623.96078
120.95 -624.12576
121 -624.29133
121.05 -624.45738
121.1 -624.62379
121.15 -624.79047
121.2 -624.95733
121.25 -625.12431
121.3 -625.29132
121.35 -625.45831
121.4 -625.62521
121.45 -625.79199
121.5 -625.9586
121.55 -626.125
121.6 -626.29115
121.65 -626.45702
121.7 -626.62259
121.75 -626.78784
121.8 -626.95273
121.85 -627.11727
121.9 -627.28143
121.95 -627.44519
122 -627.60856
122.05 -627.77151
122.1 -627.93405
122.15 -628.09616
122.2 -628.25784
122.25 -628.4191
122.3 -628.57992
122.35 -628.7403
122.4 -628.90025
122.45 -629.05977
122.5 -629.21885
122.55 -629.37749
122.6 -629.53571
122.65 -629.6935
122.7 -629.85086
122.75 -630.0078
122.8 -630.16432
122.85 -630.32043
122.9 -630.47612
122.95 -630.63141
123 -630.7863
123.05 -630.94078
123.1 -631.09488
123.15 -631.24858
123.2 -631.4019
123.25 -631.55484
123.3 -631.70741
123.35 -631.8596
123.4 -632.01143
123.45 -632.1629
123.5 -632.31402
123.55 -632.46478
123.6 -632.6152
123.65 -632.76528
123.7 -632.91502
123.75 -633.06444
123.8 -633.21352
123.85 -633.36229
123.9 -633.51074
123.95 -633.65887
124 -633.8067
124.05 -633.95423
124.1 -634.10146
124.15 -634.24839
124.2 -634.39503
124.25 -634.54139
124.3 -634.68747
124.35 -634.83327
124.4 -634.9788
124.45 -635.12406
124.5 -635.26906
124.55 -635.41379
124.6 -635.55827
124.65 -635.70249
124.7 -635.84647
124.75 -635.9902
124.8 -636.13369
124.85 -636.27694
124.9 -636.41996
124.95 -636.56274
125 -636.7053
125.05 -636.84763
125.1 -636.98975
125.15 -637.13164
125.2 -637.27333
125.25 -637.4148
125.3 -637.55606
125.35 -637.69712
125.4 -637.83797
125.45 -637.97863
125.5 -638.11909
125.55 -638.25936
125.6 -638.39944
125.65 -638.53933
125.7 -638.67904
125.75 -638.81857
125.8 -638.95792
125.85 -639.09709
125.9 -639.23608
125.95 -639.37491
126 -639.51357
126.05 -639.65206
126.1 -639.79039
126.15 -639.92855
126.2 -640.06656
126.25 -640.20441
126.3 -640.34211
126.35 -640.47965
126.4 -640.61705
126.45 -640.7543
126.5 -640.8914
126.55 -641.02836
126.6 -641.16518
126.65 -641.30186
126.7 -641.4384
126.75 -641.57481
126.8 -641.71109
126.85 -641.84723
126.9 -641.98325
126.95 -642.11913
127 -642.2549
127.05 -642.39054
127.1 -642.52606
127.15 -642.66145
127.2 -642.79674
127.25 -642.9319
127.3 -643.06695
127.35 -643.20189
127.4 -643.33672
127.45 -643.47143
127.5 -643.60604
127.55 -643.74055
127.6 -643.87495
127.65 -644.00924
127.7 -644.14344
127.75 -644.27754
127.8 -644.41153
127.85 -644.54543
127.9 -644.67924
127.95 -644.81295
128 -644.94657
128.05 -645.0801
128.1 -645.21354
128.15 -645.34689
128.2 -645.48015
128.25 -645.61333
128.3 -645.74643
128.35 -645.87944
128.4 -646.01237
128.45 -646.14522
128.5 -646.27799
128.55 -646.41069
128.6 -646.5433
128.65 -646.67584
128.7 -646.80831
128.75 -646.94071
128.8 -647.07303
128.85 -647.20529
128.9 -647.33747
128.95 -647.46959
129 -647.60164
129.05 -647.73362
129.1 -647.86554
129.15 -647.99739
129.2 -648.12918
129.25 -648.26091
129.3 -648.39258
129.35 -648.5242
129.4 -648.65575
129.45 -648.78724
129.5 -648.91868
129.55 -649.05006
129.6 -649.18139
129.65 -649.31267
129.7 -649.44389
129.75 -649.57506
129.8 -649.70618
129.85 -649.83725
129.9 -649.96827
129.95 -650.09925
130 -650.23017
130.05 -650.36105
130.1 -650.49189
130.15 -650.62268
130.2 -650.75343
130.25 -650.88413
130.3 -651.0148
130.35 -651.14542
130.4 -651.276
130.45 -651.40655
130.5 -651.53705
130.55 -651.66752
130.6 -651.79795
130.65 -651.92834
130.7 -652.0587
130.75 -652.18902
130.8 -652.31931
130.85 -652.44957
130.9 -652.57979
130.95 -652.70998
131 -652.84014
131.05 -652.97028
131.1 -653.10038
131.15 -653.23045
131.2 -653.3605
131.25 -653.49051
131.3 -653.6205
131.35 -653.75047
131.4 -653.88041
131.45 -654.01032
131.5 -654.14021
131.55 -654.27008
131.6 -654.39992
131.65 -654.52974
131.7 -654.65954
131.75 -654.78932
131.8 -654.91908
131.85 -655.04882
131.9 -655.17854
131.95 -655.30824
132 -655.43793
132.05 -655.56759
132.1 -655.69724
132.15 -655.82687
132.2 -655.95649
132.25 -656.0861
132.3 -656.21568
132.35 -656.34526
132.4 -656.47482
132.45 -656.60437
132.5 -656.7339
132.55 -656.86342
132.6 -656.99294
132.65 -657.12244
132.7 -657.25193
132.75 -657.38141
132.8 -657.51088
132.85 -657.64035
132.9 -657.7698
132.95 -657.89925
133 -658.02869
133.05 -658.15812
133.1 -658.28755
133.15 -658.41697
133.2 -658.54638
133.25 -658.67579
133.3 -658.8052
133.35 -658.9346
133.4 -659.064
133.45 -659.19339
133.5 -659.32279
133.55 -659.45218
133.6 -659.58156
133.65 -659.71095
133.7 -659.84034
133.75 -659.96972
133.8 -660.09911
133.85 -660.22849
133.9 -660.35788
133.95 -660.48726
134 -660.61665
134.05 -660.74604
134.1 -660.87543
134.15 -661.00483
134.2 -661.13422
134.25 -661.26362
134.3 -661.39303
134.35 -661.52244
134.4 -661.65185
134.45 -661.78127
134.5 -661.91069
134.55 -662.04012
134.6 -662.16955
134.65 -662.29899
134.7 -662.42844
134.75 -662.55789
134.8 -662.68735
134.85 -662.81682
134.9 -662.94629
134.95 -663.07578
135 -663.20527
135.05 -663.33477
135.1 -663.46428
135.15 -663.5938
135.2 -663.72333
135.25 -663.85287
135.3 -663.98242
135.35 -664.11199
135.4 -664.24156
135.45 -664.37114
135.5 -664.50074
135.55 -664.63034
135.6 -664.75996
135.65 -664.88959
135.7 -665.01924
135.75 -665.14889
135.8 -665.27856
135.85 -665.40825
135.9 -665.53795
135.95 -665.66766
136 -665.79738
136.05 -665.92712
136.1 -666.05688
136.15 -666.18665
136.2 -666.31643
136.25 -666.44624
136.3 -666.57605
136.35 -666.70589
136.4 -666.83574
136.45 -666.9656
136.5 -667.09548
136.55 -667.22538
136.6 -667.3553
136.65 -667.48524
136.7 -667.61519
136.75 -667.74516
136.8 -667.87515
136.85 -668.00515
136.9 -668.13518
136.95 -668.26522
137 -668.39529
137.05 -668.52537
137.1 -668.65547
137.15 -668.78559
137.2 -668.91573
137.25 -669.04589
137.3 -669.17608
137.35 -669.30628
137.4 -669.4365
137.45 -669.56674
137.5 -669.69701
137.55 -669.82729
137.6 -669.9576
137.65 -670.08793
137.7 -670.21828
137.75 -670.34865
137.8 -670.47904
137.85 -670.60946
137.9 -670.73989
137.95 -670.87036
138 -671.00084
138.05 -671.13135
138.1 -671.26187
138.15 -671.39243
138.2 -671.523
138.25 -671.6536
138.3 -671.78422
138.35 -671.91487
138.4 -672.04554
138.45 -672.17624
138.5 -672.30695
138.55 -672.4377
138.6 -672.56847
138.65 -672.69926
138.7 -672.83007
138.75 -672.96092
138.8 -673.09178
138.85 -673.22268
138.9 -673.35359
138.95 -673.48454
139 -673.6155
139.05 -673.7465
139.1 -673.87752
139.15 -674.00856
139.2 -674.13964
139.25 -674.27073
139.3 -674.40186
139.35 -674.53301
139.4 -674.66419
139.45 -674.79539
139.5 -674.92662
139.55 -675.05788
139.6 -675.18916
139.65 -675.32047
139.7 -675.45181
[truncated: 1,009 more rows]
