# Supplementary material
Source: publisher figshare collection journal article supplement (https://frontiersin.figshare.com/ndownloader/files/24979811)
Supplement: Supplementary file 1 [file 24979811 › datasheet/affect of wring scheme/D.csv]

Frequency / GHz SZmax(1)	Zmax(1) (a=2.69)/arg	degrees
----------------------------------------------------------------------
90 99.550886
90.05 99.455673
90.1 99.360189
90.15 99.264434
90.2 99.168404
90.25 99.072099
90.3 98.975517
90.35 98.878656
90.4 98.781514
90.45 98.68409
90.5 98.586381
90.55 98.488385
90.6 98.390102
90.65 98.291528
90.7 98.192662
90.75 98.093503
90.8 97.994047
90.85 97.894294
90.9 97.794241
90.95 97.693886
91 97.593228
91.05 97.492264
91.1 97.390992
91.15 97.289411
91.2 97.187517
91.25 97.08531
91.3 96.982787
91.35 96.879946
91.4 96.776786
91.45 96.673302
91.5 96.569495
91.55 96.465361
91.6 96.360899
91.65 96.256106
91.7 96.15098
91.75 96.045519
91.8 95.939721
91.85 95.833583
91.9 95.727103
91.95 95.62028
92 95.51311
92.05 95.405592
92.1 95.297724
92.15 95.189502
92.2 95.080925
92.25 94.97199
92.3 94.862695
92.35 94.753039
92.4 94.643017
92.45 94.532629
92.5 94.421871
92.55 94.310742
92.6 94.199239
92.65 94.087359
92.7 93.975101
92.75 93.862461
92.8 93.749437
92.85 93.636028
92.9 93.52223
92.95 93.408041
93 93.293459
93.05 93.178481
93.1 93.063104
93.15 92.947327
93.2 92.831147
93.25 92.71456
93.3 92.597566
93.35 92.48016
93.4 92.362341
93.45 92.244107
93.5 92.125453
93.55 92.006379
93.6 91.886881
93.65 91.766958
93.7 91.646605
93.75 91.525821
93.8 91.404603
93.85 91.282949
93.9 91.160855
93.95 91.03832
94 90.91534
94.05 90.791913
94.1 90.668036
94.15 90.543707
94.2 90.418922
94.25 90.29368
94.3 90.167976
94.35 90.04181
94.4 89.915177
94.45 89.788075
94.5 89.660501
94.55 89.532452
94.6 89.403926
94.65 89.27492
94.7 89.14543
94.75 89.015453
94.8 88.884988
94.85 88.75403
94.9 88.622577
94.95 88.490626
95 88.358173
95.05 88.225216
95.1 88.091752
95.15 87.957776
95.2 87.823287
95.25 87.68828
95.3 87.552752
95.35 87.416701
95.4 87.280122
95.45 87.143013
95.5 87.005369
95.55 86.867188
95.6 86.728465
95.65 86.589197
95.7 86.449381
95.75 86.309012
95.8 86.168087
95.85 86.026602
95.9 85.884552
95.95 85.741935
96 85.598745
96.05 85.454979
96.1 85.310633
96.15 85.165702
96.2 85.020181
96.25 84.874067
96.3 84.727355
96.35 84.58004
96.4 84.432117
96.45 84.283583
96.5 84.134431
96.55 83.984656
96.6 83.834255
96.65 83.683221
96.7 83.53155
96.75 83.379235
96.8 83.226272
96.85 83.072655
96.9 82.918378
96.95 82.763435
97 82.607821
97.05 82.451529
97.1 82.294554
97.15 82.136889
97.2 81.978527
97.25 81.819462
97.3 81.659688
97.35 81.499197
97.4 81.337983
97.45 81.176039
97.5 81.013357
97.55 80.84993
97.6 80.685751
97.65 80.520812
97.7 80.355106
97.75 80.188623
97.8 80.021357
97.85 79.8533
97.9 79.684441
97.95 79.514775
98 79.34429
98.05 79.172979
98.1 79.000833
98.15 78.827842
98.2 78.653997
98.25 78.479289
98.3 78.303707
98.35 78.127242
98.4 77.949883
98.45 77.771621
98.5 77.592445
98.55 77.412344
98.6 77.231308
98.65 77.049324
98.7 76.866383
98.75 76.682471
98.8 76.497579
98.85 76.311693
98.9 76.124802
98.95 75.936893
99 75.747953
99.05 75.55797
99.1 75.366931
99.15 75.174821
99.2 74.981628
99.25 74.787338
99.3 74.591936
99.35 74.395408
99.4 74.19774
99.45 73.998916
99.5 73.79892
99.55 73.597739
99.6 73.395355
99.65 73.191752
99.7 72.986914
99.75 72.780823
99.8 72.573464
99.85 72.364818
99.9 72.154866
99.95 71.943592
100 71.730976
100.05 71.516998
100.1 71.301641
100.15 71.084883
100.2 70.866704
100.25 70.647083
100.3 70.426
100.35 70.203432
100.4 69.979357
100.45 69.753752
100.5 69.526594
100.55 69.29786
100.6 69.067523
100.65 68.83556
100.7 68.601945
100.75 68.366651
100.8 68.129652
100.85 67.890919
100.9 67.650425
100.95 67.408139
101 67.164032
101.05 66.918073
101.1 66.670229
101.15 66.42047
101.2 66.16876
101.25 65.915065
101.3 65.659349
101.35 65.401575
101.4 65.141706
101.45 64.879701
101.5 64.615521
101.55 64.349123
101.6 64.080464
101.65 63.809499
101.7 63.53618
101.75 63.260461
101.8 62.98229
101.85 62.701615
101.9 62.418383
101.95 62.132536
102 61.844017
102.05 61.552765
102.1 61.258716
102.15 60.961804
102.2 60.66196
102.25 60.359113
102.3 60.053189
102.35 59.744109
102.4 59.431794
102.45 59.116159
102.5 58.797119
102.55 58.474585
102.6 58.148465
102.65 57.818667
102.7 57.485098
102.75 57.147665
102.8 56.806278
102.85 56.460852
102.9 56.11131
102.95 55.757591
103 55.399653
103.05 55.037485
103.1 54.671118
103.15 54.300644
103.2 53.926238
103.25 53.548192
103.3 53.166949
103.35 52.783165
103.4 52.397771
103.45 52.012064
103.5 51.627802
103.55 51.247323
103.6 50.873644
103.65 50.510535
103.7 50.162493
103.75 49.834538
103.8 49.531729
103.85 49.258307
103.9 49.01648
103.95 48.805074
104 48.6185
104.05 48.446671
104.1 48.276244
104.15 48.092983
104.2 47.88443
104.25 47.64188
104.3 47.361075
104.35 47.04173
104.4 46.686378
104.45 46.299108
104.5 45.884537
104.55 45.447125
104.6 44.990814
104.65 44.518891
104.7 44.033982
104.75 43.538123
104.8 43.032849
104.85 42.51929
104.9 41.998256
104.95 41.470309
105 40.93582
105.05 40.395012
105.1 39.848
105.15 39.294815
105.2 38.735425
105.25 38.169748
105.3 37.59767
105.35 37.019045
105.4 36.433707
105.45 35.841475
105.5 35.242153
105.55 34.635535
105.6 34.021406
105.65 33.399544
105.7 32.76972
105.75 32.131699
105.8 31.485242
105.85 30.830102
105.9 30.166028
105.95 29.492764
106 28.810049
106.05 28.117613
106.1 27.415185
106.15 26.702484
106.2 25.979225
106.25 25.245114
106.3 24.499853
106.35 23.743134
106.4 22.974643
106.45 22.194058
106.5 21.401048
106.55 20.595274
106.6 19.776389
106.65 18.944035
106.7 18.097847
106.75 17.237448
106.8 16.362454
106.85 15.472468
106.9 14.567087
106.95 13.645893
107 12.708462
107.05 11.754358
107.1 10.783135
107.15 9.7943386
107.2 8.7875037
107.25 7.7621572
107.3 6.7178176
107.35 5.6539964
107.4 4.5701982
107.45 3.465923
107.5 2.3406664
107.55 1.193922
107.6 0.025182631
107.65 -1.1660578
107.7 -2.3803025
107.75 -3.6180497
107.8 -4.8797915
107.85 -6.1660122
107.9 -7.477188
107.95 -8.8137868
108 -10.17627
108.05 -11.565096
108.1 -12.980724
108.15 -14.423623
108.2 -15.894281
108.25 -17.39322
108.3 -18.921011
108.35 -20.478295
108.4 -22.0658
108.45 -23.68437
108.5 -25.33498
108.55 -27.018762
108.6 -28.737012
108.65 -30.491204
108.7 -32.282988
108.75 -34.114177
108.8 -35.986729
108.85 -37.902716
108.9 -39.864284
108.95 -41.873612
109 -43.932857
109.05 -46.044111
109.1 -48.209346
109.15 -50.430373
109.2 -52.708797
109.25 -55.045979
109.3 -57.442998
109.35 -59.900624
109.4 -62.419283
109.45 -64.999031
109.5 -67.639524
109.55 -70.33999
109.6 -73.099207
109.65 -75.915476
109.7 -78.786601
109.75 -81.709879
109.8 -84.682086
109.85 -87.699484
109.9 -90.757833
109.95 -93.852416
110 -96.978078
110.05 -100.12928
110.1 -103.30016
110.15 -106.48462
110.2 -109.6764
110.25 -112.86917
110.3 -116.05665
110.35 -119.23266
110.4 -122.39127
110.45 -125.52681
110.5 -128.63399
110.55 -131.70796
110.6 -134.74431
110.65 -137.73916
110.7 -140.68912
110.75 -143.5913
110.8 -146.44336
110.85 -149.2434
110.9 -151.99
110.95 -154.68215
111 -157.31925
111.05 -159.90102
111.1 -162.42751
111.15 -164.89903
111.2 -167.31611
111.25 -169.67949
111.3 -171.99008
111.35 -174.24891
111.4 -176.45711
111.45 -178.61591
111.5 -180.72659
111.55 -182.79047
111.6 -184.80891
111.65 -186.78328
111.7 -188.71494
111.75 -190.60526
111.8 -192.4556
111.85 -194.26729
111.9 -196.04163
111.95 -197.7799
112 -199.48337
112.05 -201.15324
112.1 -202.79071
112.15 -204.39692
112.2 -205.97299
112.25 -207.51999
112.3 -209.03899
112.35 -210.53098
112.4 -211.99695
112.45 -213.43783
112.5 -214.85456
112.55 -216.248
112.6 -217.61901
112.65 -218.96841
112.7 -220.297
112.75 -221.60555
112.8 -222.8948
112.85 -224.16546
112.9 -225.41824
112.95 -226.6538
113 -227.87279
113.05 -229.07583
113.1 -230.26354
113.15 -231.43649
113.2 -232.59525
113.25 -233.74037
113.3 -234.87238
113.35 -235.99178
113.4 -237.09907
113.45 -238.19471
113.5 -239.27917
113.55 -240.35289
113.6 -241.41627
113.65 -242.46973
113.7 -243.51365
113.75 -244.54839
113.8 -245.5743
113.85 -246.5917
113.9 -247.60089
113.95 -248.60215
114 -249.59574
114.05 -250.5819
114.1 -251.56082
114.15 -252.53268
114.2 -253.49762
114.25 -254.45577
114.3 -255.40718
114.35 -256.3519
114.4 -257.28994
114.45 -258.22123
114.5 -259.14571
114.55 -260.06322
114.6 -260.97359
114.65 -261.87657
114.7 -262.7719
114.75 -263.65925
114.8 -264.53823
114.85 -265.40844
114.9 -266.26943
114.95 -267.12074
115 -267.9619
115.05 -268.79244
115.1 -269.61192
115.15 -270.41996
115.2 -271.21624
115.25 -272.00057
115.3 -272.77287
115.35 -273.53325
115.4 -274.282
115.45 -275.01962
115.5 -275.74686
115.55 -276.46471
115.6 -277.17439
115.65 -277.87737
115.7 -278.57534
115.75 -279.27013
115.8 -279.96374
115.85 -280.65824
115.9 -281.35573
115.95 -282.0583
116 -282.76795
116.05 -283.48659
116.1 -284.21595
116.15 -284.95759
116.2 -285.71287
116.25 -286.48295
116.3 -287.26879
116.35 -288.07113
116.4 -288.89057
116.45 -289.72753
116.5 -290.58229
116.55 -291.45504
116.6 -292.34586
116.65 -293.25477
116.7 -294.18175
116.75 -295.12673
116.8 -296.08965
116.85 -297.07043
116.9 -298.06902
116.95 -299.08538
117 -300.11949
117.05 -301.17137
117.1 -302.24107
117.15 -303.3287
117.2 -304.43438
117.25 -305.5583
117.3 -306.70067
117.35 -307.86177
117.4 -309.0419
117.45 -310.24141
117.5 -311.46071
117.55 -312.70023
117.6 -313.96046
117.65 -315.24193
117.7 -316.54519
117.75 -317.87088
117.8 -319.21963
117.85 -320.59217
117.9 -321.98922
117.95 -323.41158
118 -324.86009
118.05 -326.33563
118.1 -327.83912
118.15 -329.37156
118.2 -330.93397
118.25 -332.52744
118.3 -334.15311
118.35 -335.81217
118.4 -337.50587
118.45 -339.23553
118.5 -341.00252
118.55 -342.80827
118.6 -344.65428
118.65 -346.54211
118.7 -348.47339
118.75 -350.44979
118.8 -352.47306
118.85 -354.54501
118.9 -356.66749
118.95 -358.84239
119 -361.07164
119.05 -363.35721
119.1 -365.70103
119.15 -368.10507
119.2 -370.57121
119.25 -373.10128
119.3 -375.69703
119.35 -378.36
119.4 -381.09159
119.45 -383.8929
119.5 -386.76472
119.55 -389.70748
119.6 -392.72109
119.65 -395.80497
119.7 -398.95788
119.75 -402.17792
119.8 -405.46239
119.85 -408.8078
119.9 -412.20979
119.95 -415.66313
120 -419.16173
120.05 -422.69869
120.1 -426.26637
120.15 -429.85648
120.2 -433.46025
120.25 -437.06858
120.3 -440.67223
120.35 -444.26199
120.4 -447.82886
120.45 -451.36428
120.5 -454.86021
120.55 -458.30933
120.6 -461.70507
120.65 -465.04172
120.7 -468.31445
120.75 -471.51931
120.8 -474.6532
120.85 -477.71382
120.9 -480.69963
120.95 -483.60975
121 -486.44392
121.05 -489.20238
121.1 -491.88582
121.15 -494.49529
121.2 -497.03215
121.25 -499.49798
121.3 -501.89457
121.35 -504.22381
121.4 -506.48771
121.45 -508.68832
121.5 -510.82773
121.55 -512.90803
121.6 -514.93129
121.65 -516.89957
121.7 -518.81487
121.75 -520.67915
121.8 -522.49429
121.85 -524.26215
121.9 -525.98448
121.95 -527.66301
122 -529.29936
122.05 -530.89511
122.1 -532.45177
122.15 -533.97078
122.2 -535.45353
122.25 -536.90134
122.3 -538.31546
122.35 -539.69712
122.4 -541.04745
122.45 -542.36757
122.5 -543.65854
122.55 -544.92135
122.6 -546.15697
122.65 -547.36633
122.7 -548.5503
122.75 -549.70974
122.8 -550.84544
122.85 -551.95819
122.9 -553.04873
122.95 -554.11776
123 -555.16597
123.05 -556.19401
123.1 -557.20251
123.15 -558.19208
123.2 -559.16329
123.25 -560.11669
123.3 -561.05283
123.35 -561.97221
123.4 -562.87534
123.45 -563.76268
123.5 -564.63471
123.55 -565.49185
123.6 -566.33453
123.65 -567.16317
123.7 -567.97816
123.75 -568.77988
123.8 -569.56871
123.85 -570.34499
123.9 -571.10907
123.95 -571.86128
124 -572.60194
124.05 -573.33137
124.1 -574.04986
124.15 -574.75771
124.2 -575.45519
124.25 -576.14257
124.3 -576.82012
124.35 -577.4881
124.4 -578.14675
124.45 -578.79631
124.5 -579.43701
124.55 -580.06908
124.6 -580.69274
124.65 -581.30819
124.7 -581.91565
124.75 -582.51531
124.8 -583.10736
124.85 -583.69201
124.9 -584.26942
124.95 -584.83978
125 -585.40325
125.05 -585.96001
125.1 -586.51023
125.15 -587.05404
125.2 -587.59163
125.25 -588.12312
125.3 -588.64867
125.35 -589.16842
125.4 -589.6825
125.45 -590.19105
125.5 -590.69419
125.55 -591.19206
125.6 -591.68477
125.65 -592.17243
125.7 -592.65516
125.75 -593.13306
125.8 -593.60624
125.85 -594.07479
125.9 -594.5388
125.95 -594.99836
126 -595.45354
126.05 -595.90442
126.1 -596.35107
126.15 -596.79352
126.2 -597.23184
126.25 -597.66606
126.3 -598.09619
126.35 -598.52225
126.4 -598.94423
126.45 -599.3621
126.5 -599.77582
126.55 -600.18533
126.6 -600.59054
126.65 -600.99133
126.7 -601.38756
126.75 -601.77905
126.8 -602.16559
126.85 -602.54693
126.9 -602.9228
126.95 -603.29286
127 -603.65677
127.05 -604.01414
127.1 -604.36456
127.15 -604.70761
127.2 -605.04286
127.25 -605.36991
127.3 -605.68839
127.35 -605.99801
127.4 -606.29857
127.45 -606.58998
127.5 -606.87235
127.55 -607.14591
127.6 -607.41113
127.65 -607.66867
127.7 -607.91936
127.75 -608.16422
127.8 -608.40439
127.85 -608.64109
127.9 -608.87557
127.95 -609.10904
128 -609.34263
128.05 -609.57733
128.1 -609.814
128.15 -610.05329
128.2 -610.29569
128.25 -610.54149
128.3 -610.79085
128.35 -611.04378
128.4 -611.30015
128.45 -611.55979
128.5 -611.82242
128.55 -612.08775
128.6 -612.35545
128.65 -612.62518
128.7 -612.8966
128.75 -613.1694
128.8 -613.44325
128.85 -613.71788
128.9 -613.99302
128.95 -614.26843
129 -614.54389
129.05 -614.8192
129.1 -615.0942
129.15 -615.36873
129.2 -615.64267
129.25 -615.91589
129.3 -616.18829
129.35 -616.45981
129.4 -616.73035
129.45 -616.99986
129.5 -617.26829
129.55 -617.53559
129.6 -617.80174
129.65 -618.0667
129.7 -618.33045
129.75 -618.59298
129.8 -618.85427
129.85 -619.11431
129.9 -619.37311
129.95 -619.63065
130 -619.88694
130.05 -620.14198
130.1 -620.39578
130.15 -620.64834
130.2 -620.89967
130.25 -621.14978
130.3 -621.39868
130.35 -621.64637
130.4 -621.89287
130.45 -622.1382
130.5 -622.38236
130.55 -622.62536
130.6 -622.86723
130.65 -623.10796
130.7 -623.34758
130.75 -623.5861
130.8 -623.82354
130.85 -624.05989
130.9 -624.29519
130.95 -624.52944
131 -624.76266
131.05 -624.99485
131.1 -625.22604
131.15 -625.45623
131.2 -625.68544
131.25 -625.91368
131.3 -626.14096
131.35 -626.3673
131.4 -626.59271
131.45 -626.8172
131.5 -627.04078
131.55 -627.26347
131.6 -627.48527
131.65 -627.7062
131.7 -627.92627
131.75 -628.14548
131.8 -628.36386
131.85 -628.58141
131.9 -628.79815
131.95 -629.01408
132 -629.22921
132.05 -629.44355
132.1 -629.65712
132.15 -629.86992
132.2 -630.08196
132.25 -630.29326
132.3 -630.50381
132.35 -630.71364
132.4 -630.92275
132.45 -631.13115
132.5 -631.33884
132.55 -631.54585
132.6 -631.75216
132.65 -631.9578
132.7 -632.16277
132.75 -632.36708
132.8 -632.57074
132.85 -632.77375
132.9 -632.97613
132.95 -633.17787
133 -633.379
133.05 -633.57951
133.1 -633.77941
133.15 -633.97871
133.2 -634.17742
133.25 -634.37554
133.3 -634.57308
133.35 -634.77005
133.4 -634.96645
133.45 -635.16229
133.5 -635.35758
133.55 -635.55232
133.6 -635.74652
133.65 -635.94018
133.7 -636.13332
133.75 -636.32593
133.8 -636.51802
133.85 -636.70961
133.9 -636.90068
133.95 -637.09126
134 -637.28134
134.05 -637.47093
134.1 -637.66004
134.15 -637.84866
134.2 -638.03682
134.25 -638.2245
134.3 -638.41172
134.35 -638.59848
134.4 -638.78479
134.45 -638.97065
134.5 -639.15606
134.55 -639.34104
134.6 -639.52558
134.65 -639.70969
134.7 -639.89337
134.75 -640.07663
134.8 -640.25947
134.85 -640.4419
134.9 -640.62393
134.95 -640.80554
135 -640.98676
135.05 -641.16758
135.1 -641.348
135.15 -641.52804
135.2 -641.7077
135.25 -641.88697
135.3 -642.06586
135.35 -642.24439
135.4 -642.42254
135.45 -642.60033
135.5 -642.77775
135.55 -642.95482
135.6 -643.13153
135.65 -643.30789
135.7 -643.4839
135.75 -643.65956
135.8 -643.83489
135.85 -644.00987
135.9 -644.18452
135.95 -644.35884
136 -644.53283
136.05 -644.70649
136.1 -644.87983
136.15 -645.05285
136.2 -645.22556
136.25 -645.39795
136.3 -645.57003
136.35 -645.7418
136.4 -645.91327
136.45 -646.08443
136.5 -646.2553
136.55 -646.42586
136.6 -646.59614
136.65 -646.76612
136.7 -646.93582
136.75 -647.10523
136.8 -647.27435
136.85 -647.4432
136.9 -647.61176
136.95 -647.78005
137 -647.94807
137.05 -648.11581
137.1 -648.28329
137.15 -648.4505
137.2 -648.61745
137.25 -648.78413
137.3 -648.95056
137.35 -649.11673
137.4 -649.28264
137.45 -649.4483
137.5 -649.61371
137.55 -649.77887
137.6 -649.94379
137.65 -650.10846
137.7 -650.27289
137.75 -650.43708
137.8 -650.60103
137.85 -650.76475
137.9 -650.92823
137.95 -651.09148
138 -651.2545
138.05 -651.41729
138.1 -651.57985
138.15 -651.7422
138.2 -651.90431
138.25 -652.06621
138.3 -652.22789
138.35 -652.38935
138.4 -652.5506
138.45 -652.71163
138.5 -652.87245
138.55 -653.03306
138.6 -653.19346
138.65 -653.35365
138.7 -653.51364
138.75 -653.67342
138.8 -653.83301
138.85 -653.99239
138.9 -654.15157
138.95 -654.31056
139 -654.46935
139.05 -654.62794
139.1 -654.78635
139.15 -654.94456
139.2 -655.10258
139.25 -655.26041
139.3 -655.41806
139.35 -655.57552
139.4 -655.73279
139.45 -655.88989
139.5 -656.0468
139.55 -656.20353
139.6 -656.36008
139.65 -656.51646
139.7 -656.67266
139.75 -656.82868
139.8 -656.98453
139.85 -657.14021
139.9 -657.29572
139.95 -657.45105
140 -657.60622
Frequency / GHz SZmax(1)	Zmax(1) (a=3.1)/arg	degrees
----------------------------------------------------------------------
90 96.809077
90.05 96.692271
90.1 96.575068
90.15 96.457462
90.2 96.339452
90.25 96.221033
90.3 96.102202
90.35 95.982955
90.4 95.863289
90.45 95.743201
90.5 95.622687
90.55 95.501742
90.6 95.380364
90.65 95.258549
90.7 95.136292
90.75 95.01359
90.8 94.890439
90.85 94.766835
90.9 94.642774
90.95 94.518252
91 94.393264
91.05 94.267808
91.1 94.141877
91.15 94.015469
91.2 93.888579
91.25 93.761202
91.3 93.633334
91.35 93.504971
91.4 93.376107
91.45 93.246739
91.5 93.116861
91.55 92.986469
91.6 92.855559
91.65 92.724124
91.7 92.592161
91.75 92.459664
91.8 92.326628
91.85 92.193048
91.9 92.058919
91.95 91.924235
92 91.788991
92.05 91.653183
92.1 91.516803
92.15 91.379848
92.2 91.24231
92.25 91.104184
92.3 90.965465
92.35 90.826147
92.4 90.686223
92.45 90.545687
92.5 90.404534
92.55 90.262757
92.6 90.12035
92.65 89.977306
92.7 89.833619
92.75 89.689283
92.8 89.54429
92.85 89.398633
92.9 89.252307
92.95 89.105303
93 88.957615
93.05 88.809236
93.1 88.660158
93.15 88.510373
93.2 88.359875
93.25 88.208656
93.3 88.056707
93.35 87.904021
93.4 87.75059
93.45 87.596406
93.5 87.441461
93.55 87.285746
93.6 87.129252
93.65 86.971971
93.7 86.813895
93.75 86.655014
93.8 86.495319
93.85 86.334801
93.9 86.173451
93.95 86.011259
94 85.848216
94.05 85.684311
94.1 85.519536
94.15 85.353879
94.2 85.18733
94.25 85.019879
94.3 84.851515
94.35 84.682228
94.4 84.512007
94.45 84.34084
94.5 84.168715
94.55 83.995622
94.6 83.821549
94.65 83.646483
94.7 83.470413
94.75 83.293327
94.8 83.11521
94.85 82.936052
94.9 82.755839
94.95 82.574557
95 82.392193
95.05 82.208734
95.1 82.024165
95.15 81.838472
95.2 81.651642
95.25 81.463658
95.3 81.274507
95.35 81.084172
95.4 80.892639
95.45 80.699891
95.5 80.505913
95.55 80.310688
95.6 80.114199
95.65 79.916429
95.7 79.717362
95.75 79.516978
95.8 79.315261
95.85 79.112192
95.9 78.907752
95.95 78.701923
96 78.494684
96.05 78.286016
96.1 78.075898
96.15 77.864311
96.2 77.651233
96.25 77.436642
96.3 77.220518
96.35 77.002836
96.4 76.783576
96.45 76.562713
96.5 76.340224
96.55 76.116084
96.6 75.89027
96.65 75.662755
96.7 75.433514
96.75 75.202521
96.8 74.969749
96.85 74.73517
96.9 74.498757
96.95 74.26048
97 74.020311
97.05 73.778219
97.1 73.534175
97.15 73.288146
97.2 73.040102
97.25 72.790008
97.3 72.537832
97.35 72.28354
97.4 72.027097
97.45 71.768467
97.5 71.507612
97.55 71.244497
97.6 70.979082
97.65 70.711328
97.7 70.441194
97.75 70.168641
97.8 69.893624
97.85 69.616102
97.9 69.33603
97.95 69.053361
98 68.76805
98.05 68.480049
98.1 68.189308
98.15 67.895778
98.2 67.599406
98.25 67.30014
98.3 66.997925
98.35 66.692705
98.4 66.384423
98.45 66.073019
98.5 65.758434
98.55 65.440605
98.6 65.119467
98.65 64.794955
98.7 64.467002
98.75 64.135537
98.8 63.80049
98.85 63.461786
98.9 63.119349
98.95 62.773102
99 62.422964
99.05 62.068853
99.1 61.710684
99.15 61.34837
99.2 60.981821
99.25 60.610944
99.3 60.235646
99.35 59.855829
99.4 59.471394
99.45 59.082239
99.5 58.68826
99.55 58.289351
99.6 57.885406
99.65 57.476316
99.7 57.061971
99.75 56.642264
99.8 56.217086
99.85 55.786332
99.9 55.349902
99.95 54.907701
100 54.459645
100.05 54.00566
100.1 53.545693
100.15 53.07971
100.2 52.607712
100.25 52.129736
100.3 51.64587
100.35 51.156269
100.4 50.661167
100.45 50.160899
100.5 49.655924
100.55 49.146849
100.6 48.634457
100.65 48.119723
100.7 47.603841
100.75 47.08821
100.8 46.574419
100.85 46.064168
100.9 45.559146
100.95 45.060835
101 44.570246
101.05 44.087612
101.1 43.612081
101.15 43.141504
101.2 42.672395
101.25 42.200137
101.3 41.719425
101.35 41.224863
101.4 40.71158
101.45 40.175704
101.5 39.614617
101.55 39.026964
101.6 38.412479
101.65 37.771714
101.7 37.105743
101.75 36.415899
101.8 35.703581
101.85 34.970111
101.9 34.216658
101.95 33.444198
102 32.653501
102.05 31.845143
102.1 31.01952
102.15 30.176867
102.2 29.317282
102.25 28.440747
102.3 27.547141
102.35 26.63626
102.4 25.707829
102.45 24.761509
102.5 23.79691
102.55 22.813597
102.6 21.811093
102.65 20.788886
102.7 19.746431
102.75 18.683152
102.8 17.598446
102.85 16.491681
102.9 15.362202
102.95 14.209324
103 13.03234
103.05 11.830515
103.1 10.603089
103.15 9.349274
103.2 8.0682556
103.25 6.7591888
103.3 5.4211978
103.35 4.0533736
103.4 2.6547712
103.45 1.2244062
103.5 -0.2387486
103.55 -1.7357684
103.6 -3.2677816
103.65 -4.835976
103.7 -6.4416065
103.75 -8.0860027
103.8 -9.7705783
103.85 -11.496841
103.9 -13.266401
103.95 -15.080985
104 -16.94244
104.05 -18.852749
104.1 -20.814032
104.15 -22.82855
104.2 -24.89871
104.25 -27.027051
104.3 -29.216239
104.35 -31.469043
104.4 -33.788308
104.45 -36.176915
104.5 -38.637735
104.55 -41.173565
104.6 -43.787062
104.65 -46.480656
104.7 -49.256461
104.75 -52.116172
104.8 -55.060953
104.85 -58.091325
104.9 -61.207047
104.95 -64.406999
105 -67.689074
105.05 -71.050085
105.1 -74.485695
105.15 -77.99037
105.2 -81.557379
105.25 -85.178833
105.3 -88.845771
105.35 -92.548303
105.4 -96.275794
105.45 -100.01709
105.5 -103.76077
105.55 -107.49541
105.6 -111.20987
105.65 -114.89352
105.7 -118.53647
105.75 -122.12976
105.8 -125.66547
105.85 -129.13679
105.9 -132.5381
105.95 -135.86489
106 -139.11378
106.05 -142.28239
106.1 -145.36927
106.15 -148.37379
106.2 -151.29602
106.25 -154.13666
106.3 -156.89685
106.35 -159.57819
106.4 -162.18255
106.45 -164.71204
106.5 -167.16896
106.55 -169.5557
106.6 -171.87472
106.65 -174.12853
106.7 -176.31961
106.75 -178.45043
106.8 -180.52341
106.85 -182.54093
106.9 -184.50526
106.95 -186.41864
107 -188.28321
107.05 -190.10101
107.1 -191.87404
107.15 -193.60418
107.2 -195.29324
107.25 -196.94295
107.3 -198.55498
107.35 -200.1309
107.4 -201.67223
107.45 -203.1804
107.5 -204.65681
107.55 -206.10277
107.6 -207.51954
107.65 -208.90834
107.7 -210.27032
107.75 -211.6066
107.8 -212.91823
107.85 -214.20625
107.9 -215.47164
107.95 -216.71534
108 -217.93827
108.05 -219.14132
108.1 -220.32532
108.15 -221.49111
108.2 -222.63948
108.25 -223.77121
108.3 -224.88704
108.35 -225.98771
108.4 -227.07394
108.45 -228.14642
108.5 -229.20582
108.55 -230.25283
108.6 -231.28808
108.65 -232.31222
108.7 -233.32588
108.75 -234.32967
108.8 -235.32422
108.85 -236.31011
108.9 -237.28793
108.95 -238.25826
109 -239.22163
109.05 -240.17859
109.1 -241.12964
109.15 -242.07524
109.2 -243.01579
109.25 -243.95163
109.3 -244.88299
109.35 -245.80997
109.4 -246.73251
109.45 -247.65027
109.5 -248.56264
109.55 -249.46858
109.6 -250.36654
109.65 -251.25437
109.7 -252.12912
109.75 -252.98702
109.8 -253.82339
109.85 -254.63278
109.9 -255.40919
109.95 -256.14665
110 -256.84005
110.05 -257.48626
110.1 -258.08524
110.15 -258.64093
110.2 -259.16146
110.25 -259.65844
110.3 -260.14549
110.35 -260.63625
110.4 -261.14265
110.45 -261.67367
110.5 -262.23492
110.55 -262.8289
110.6 -263.45563
110.65 -264.11343
110.7 -264.79963
110.75 -265.51116
110.8 -266.24488
110.85 -266.99789
110.9 -267.76761
110.95 -268.55184
111 -269.34876
111.05 -270.1569
111.1 -270.9751
111.15 -271.80248
111.2 -272.63839
111.25 -273.48236
111.3 -274.3341
111.35 -275.19343
111.4 -276.0603
111.45 -276.93474
111.5 -277.81685
111.55 -278.70683
111.6 -279.60489
111.65 -280.5113
111.7 -281.42639
111.75 -282.35049
111.8 -283.284
111.85 -284.22733
111.9 -285.1809
111.95 -286.14517
112 -287.12064
112.05 -288.1078
112.1 -289.10719
112.15 -290.11936
112.2 -291.14489
112.25 -292.18436
112.3 -293.23842
112.35 -294.3077
112.4 -295.39288
112.45 -296.49467
112.5 -297.6138
112.55 -298.75102
112.6 -299.90715
112.65 -301.08302
112.7 -302.27949
112.75 -303.49749
112.8 -304.73796
112.85 -306.00192
112.9 -307.29043
112.95 -308.60459
113 -309.94559
113.05 -311.31467
113.1 -312.71315
113.15 -314.14242
113.2 -315.60396
113.25 -317.09936
113.3 -318.6303
113.35 -320.19858
113.4 -321.80614
113.45 -323.45505
113.5 -325.14754
113.55 -326.88602
113.6 -328.6731
113.65 -330.51159
113.7 -332.40458
113.75 -334.35538
113.8 -336.36765
113.85 -338.44536
113.9 -340.59291
113.95 -342.81513
114 -345.11738
114.05 -347.50573
114.1 -349.98717
114.15 -352.57023
114.2 -355.26657
114.25 -358.09702
114.3 -361.12667
114.35 -365.14389
114.4 -366.69946
114.45 -370.17329
114.5 -373.69577
114.55 -377.35101
114.6 -381.16485
114.65 -385.14983
114.7 -389.31307
114.75 -393.65759
114.8 -398.18217
114.85 -402.88071
114.9 -407.74153
114.95 -412.74693
115 -417.87301
115.05 -423.09009
115.1 -428.36373
115.15 -433.65629
115.2 -438.9289
115.25 -444.14368
115.3 -449.26571
115.35 -454.26467
115.4 -459.11592
115.45 -463.80093
115.5 -468.30721
115.55 -472.62772
115.6 -476.76017
115.65 -480.70603
115.7 -484.46972
115.75 -488.0577
115.8 -491.47785
115.85 -494.73884
115.9 -497.84973
115.95 -500.8196
116 -503.65738
116.05 -506.37161
116.1 -508.97043
116.15 -511.46146
116.2 -513.85181
116.25 -516.14807
116.3 -518.35634
116.35 -520.4822
116.4 -522.53083
116.45 -524.50694
116.5 -526.4149
116.55 -528.25869
116.6 -530.04199
116.65 -531.76816
116.7 -533.44033
116.75 -535.06134
116.8 -536.63386
116.85 -538.16033
116.9 -539.64301
116.95 -541.08402
117 -542.4853
117.05 -543.84867
117.1 -545.17585
117.15 -546.46841
117.2 -547.72784
117.25 -548.95554
117.3 -550.15281
117.35 -551.32088
117.4 -552.46092
117.45 -553.57401
117.5 -554.66119
117.55 -555.72344
117.6 -556.76168
117.65 -557.77679
117.7 -558.76961
117.75 -559.74091
117.8 -560.69146
117.85 -561.62198
117.9 -562.53313
117.95 -563.42559
118 -564.29996
118.05 -565.15685
118.1 -565.99682
118.15 -566.82041
118.2 -567.62815
118.25 -568.42053
118.3 -569.19804
118.35 -569.96112
118.4 -570.71022
118.45 -571.44577
118.5 -572.16817
118.55 -572.8778
118.6 -573.57505
118.65 -574.26028
118.7 -574.93383
118.75 -575.59603
118.8 -576.24721
118.85 -576.88768
118.9 -577.51774
118.95 -578.13768
119 -578.74777
119.05 -579.34828
119.1 -579.93948
119.15 -580.5216
119.2 -581.09491
119.25 -581.65961
119.3 -582.21595
119.35 -582.76414
119.4 -583.30439
119.45 -583.83691
119.5 -584.36189
119.55 -584.87951
119.6 -585.38998
119.65 -585.89346
119.7 -586.39012
119.75 -586.88015
119.8 -587.36368
119.85 -587.8409
119.9 -588.31194
119.95 -588.77695
120 -589.23608
120.05 -589.68947
120.1 -590.13724
120.15 -590.57954
120.2 -591.01648
120.25 -591.4482
120.3 -591.8748
120.35 -592.29641
120.4 -592.71314
120.45 -593.12509
120.5 -593.53238
120.55 -593.9351
120.6 -594.33336
120.65 -594.72725
120.7 -595.11686
120.75 -595.5023
120.8 -595.88365
120.85 -596.26099
120.9 -596.63441
120.95 -597.004
121 -597.36983
121.05 -597.73197
121.1 -598.09052
121.15 -598.44553
121.2 -598.79709
121.25 -599.14525
121.3 -599.4901
121.35 -599.83169
121.4 -600.1701
121.45 -600.50537
121.5 -600.83758
121.55 -601.16679
121.6 -601.49304
121.65 -601.81641
121.7 -602.13694
121.75 -602.45469
121.8 -602.76971
121.85 -603.08205
121.9 -603.39176
121.95 -603.69889
122 -604.00349
122.05 -604.3056
122.1 -604.60527
122.15 -604.90255
122.2 -605.19747
122.25 -605.49007
122.3 -605.78041
122.35 -606.06851
122.4 -606.35442
122.45 -606.63817
122.5 -606.9198
122.55 -607.19935
122.6 -607.47684
122.65 -607.75233
122.7 -608.02583
122.75 -608.29738
122.8 -608.56701
122.85 -608.83476
122.9 -609.10064
122.95 -609.3647
123 -609.62695
123.05 -609.88742
123.1 -610.14615
123.15 -610.40315
123.2 -610.65845
123.25 -610.91208
123.3 -611.16404
123.35 -611.41438
123.4 -611.6631
123.45 -611.91023
123.5 -612.15578
123.55 -612.39978
123.6 -612.64224
123.65 -612.88317
123.7 -613.12259
123.75 -613.36052
123.8 -613.59696
123.85 -613.83192
123.9 -614.06541
123.95 -614.29745
124 -614.52803
124.05 -614.75717
124.1 -614.98486
124.15 -615.2111
124.2 -615.4359
124.25 -615.65924
124.3 -615.88113
124.35 -616.10155
124.4 -616.32049
124.45 -616.53794
124.5 -616.75388
124.55 -616.9683
124.6 -617.18116
124.65 -617.39245
124.7 -617.60213
124.75 -617.81017
124.8 -618.01654
124.85 -618.22119
124.9 -618.42409
124.95 -618.6252
125 -618.82447
125.05 -619.02186
125.1 -619.21734
125.15 -619.41088
125.2 -619.60243
125.25 -619.792
125.3 -619.97959
125.35 -620.1652
125.4 -620.34888
125.45 -620.53071
125.5 -620.71079
125.55 -620.88926
125.6 -621.06631
125.65 -621.24216
125.7 -621.41708
125.75 -621.59138
125.8 -621.7654
125.85 -621.93949
125.9 -622.11403
125.95 -622.28937
126 -622.46584
126.05 -622.64375
126.1 -622.82332
126.15 -623.00472
126.2 -623.18805
126.25 -623.37334
126.3 -623.56052
126.35 -623.74951
126.4 -623.94013
126.45 -624.13218
126.5 -624.32545
126.55 -624.51969
126.6 -624.71467
126.65 -624.91016
126.7 -625.10593
126.75 -625.3018
126.8 -625.49757
126.85 -625.69309
126.9 -625.88824
126.95 -626.08289
127 -626.27695
127.05 -626.47035
127.1 -626.66302
127.15 -626.85493
127.2 -627.04603
127.25 -627.23631
127.3 -627.42575
127.35 -627.61434
127.4 -627.80209
127.45 -627.98898
127.5 -628.17504
127.55 -628.36027
127.6 -628.54468
127.65 -628.72829
127.7 -628.91112
127.75 -629.09317
127.8 -629.27446
127.85 -629.45502
127.9 -629.63485
127.95 -629.81398
128 -629.99242
128.05 -630.17019
128.1 -630.34731
128.15 -630.52379
128.2 -630.69964
128.25 -630.87489
128.3 -631.04954
128.35 -631.22361
128.4 -631.39711
128.45 -631.57006
128.5 -631.74248
128.55 -631.91436
128.6 -632.08573
128.65 -632.25659
128.7 -632.42696
128.75 -632.59684
128.8 -632.76625
128.85 -632.9352
128.9 -633.1037
128.95 -633.27175
129 -633.43936
129.05 -633.60655
129.1 -633.77332
129.15 -633.93968
129.2 -634.10563
129.25 -634.2712
129.3 -634.43637
129.35 -634.60116
129.4 -634.76558
129.45 -634.92963
129.5 -635.09332
129.55 -635.25666
129.6 -635.41964
129.65 -635.58229
129.7 -635.7446
129.75 -635.90658
129.8 -636.06823
129.85 -636.22956
129.9 -636.39057
129.95 -636.55128
130 -636.71168
130.05 -636.87178
130.1 -637.03159
130.15 -637.1911
130.2 -637.35033
130.25 -637.50928
130.3 -637.66795
130.35 -637.82634
130.4 -637.98447
130.45 -638.14233
130.5 -638.29993
130.55 -638.45727
130.6 -638.61436
130.65 -638.77119
130.7 -638.92779
130.75 -639.08413
130.8 -639.24024
130.85 -639.39612
130.9 -639.55176
130.95 -639.70717
131 -639.86236
131.05 -640.01732
131.1 -640.17207
131.15 -640.32659
131.2 -640.48091
131.25 -640.63501
131.3 -640.78891
131.35 -640.9426
131.4 -641.0961
131.45 -641.24939
131.5 -641.40249
131.55 -641.55539
131.6 -641.7081
131.65 -641.86063
131.7 -642.01297
131.75 -642.16512
131.8 -642.3171
131.85 -642.4689
131.9 -642.62052
131.95 -642.77197
132 -642.92325
132.05 -643.07436
132.1 -643.22531
132.15 -643.37609
132.2 -643.52672
132.25 -643.67718
132.3 -643.82748
132.35 -643.97763
132.4 -644.12763
132.45 -644.27748
132.5 -644.42718
132.55 -644.57674
132.6 -644.72615
132.65 -644.87541
132.7 -645.02454
132.75 -645.17353
132.8 -645.32238
132.85 -645.4711
132.9 -645.61969
132.95 -645.76814
133 -645.91647
133.05 -646.06467
133.1 -646.21274
133.15 -646.3607
133.2 -646.50853
133.25 -646.65624
133.3 -646.80383
133.35 -646.9513
133.4 -647.09866
133.45 -647.24591
133.5 -647.39305
133.55 -647.54007
133.6 -647.68699
133.65 -647.8338
133.7 -647.98051
133.75 -648.12711
133.8 -648.27362
133.85 -648.42002
133.9 -648.56632
133.95 -648.71252
134 -648.85863
134.05 -649.00465
134.1 -649.15057
134.15 -649.2964
134.2 -649.44214
134.25 -649.58779
134.3 -649.73335
134.35 -649.87883
134.4 -650.02422
134.45 -650.16953
134.5 -650.31476
134.55 -650.45991
134.6 -650.60497
134.65 -650.74996
134.7 -650.89487
134.75 -651.03971
134.8 -651.18447
134.85 -651.32916
134.9 -651.47378
134.95 -651.61833
135 -651.76281
135.05 -651.90722
135.1 -652.05156
135.15 -652.19584
135.2 -652.34005
135.25 -652.4842
135.3 -652.62828
135.35 -652.77231
135.4 -652.91627
135.45 -653.06018
135.5 -653.20402
135.55 -653.34781
135.6 -653.49155
135.65 -653.63523
135.7 -653.77885
135.75 -653.92243
135.8 -654.06595
135.85 -654.20942
135.9 -654.35284
135.95 -654.49621
136 -654.63954
136.05 -654.78282
136.1 -654.92605
136.15 -655.06924
136.2 -655.21238
136.25 -655.35548
136.3 -655.49854
136.35 -655.64156
136.4 -655.78454
136.45 -655.92748
136.5 -656.07038
136.55 -656.21325
136.6 -656.35607
136.65 -656.49887
136.7 -656.64162
136.75 -656.78435
136.8 -656.92704
136.85 -657.0697
136.9 -657.21232
136.95 -657.35492
137 -657.49749
137.05 -657.64003
137.1 -657.78254
137.15 -657.92502
137.2 -658.06748
137.25 -658.20991
137.3 -658.35232
137.35 -658.4947
137.4 -658.63706
137.45 -658.7794
137.5 -658.92171
137.55 -659.06401
137.6 -659.20628
137.65 -659.34854
137.7 -659.49077
137.75 -659.63299
137.8 -659.77519
137.85 -659.91738
137.9 -660.05955
137.95 -660.2017
138 -660.34384
138.05 -660.48597
138.1 -660.62808
138.15 -660.77018
138.2 -660.91227
138.25 -661.05435
138.3 -661.19641
138.35 -661.33847
138.4 -661.48052
138.45 -661.62256
138.5 -661.76459
138.55 -661.90661
138.6 -662.04863
138.65 -662.19064
138.7 -662.33265
138.75 -662.47465
138.8 -662.61665
138.85 -662.75865
138.9 -662.90064
138.95 -663.04263
139 -663.18462
139.05 -663.3266
139.1 -663.46859
139.15 -663.61057
139.2 -663.75256
139.25 -663.89455
139.3 -664.03654
139.35 -664.17853
139.4 -664.32052
139.45 -664.46252
139.5 -664.60452
139.55 -664.74653
139.6 -664.88854
139.65 -665.03055
139.7 -665.17258
[truncated: 12,042 more rows]
