# Supplementary material
Source: publisher figshare collection journal article supplement (https://frontiersin.figshare.com/ndownloader/files/24979811)
Supplement: Supplementary file 1 [file 24979811 › datasheet/azimuth plane/-10.csv]

Theta [deg.] Phi [deg.] Abs(Gain)[dB ] Abs(??? )[dB ] Phase(??? )[deg.] Abs(??? )[dB ] Phase(??? )[deg.] Ax.Ratio[dB ]
------------------------------------------------------------------------------------------------------------------------------------------------------
-180.000 0.000 -7.745e+00 -7.745e+00 0.000 -7.745e+00 0.000 -4.344e+01
-179.000 0.000 -1.156e+01 -1.156e+01 0.000 -1.156e+01 0.000 -5.106e+01
-178.000 0.000 -3.641e+01 -3.641e+01 0.000 -3.641e+01 0.000 -1.008e+02
-177.000 0.000 -2.069e+01 -2.069e+01 0.000 -2.069e+01 0.000 -6.933e+01
-176.000 0.000 -2.034e+01 -2.034e+01 0.000 -2.034e+01 0.000 -6.862e+01
-175.000 0.000 -8.852e+00 -8.852e+00 0.000 -8.852e+00 0.000 -4.565e+01
-174.000 0.000 -6.835e+00 -6.835e+00 0.000 -6.835e+00 0.000 -4.162e+01
-173.000 0.000 -1.032e+01 -1.032e+01 0.000 -1.032e+01 0.000 -4.858e+01
-172.000 0.000 -1.330e+01 -1.330e+01 0.000 -1.330e+01 0.000 -5.455e+01
-171.000 0.000 -1.225e+01 -1.225e+01 0.000 -1.225e+01 0.000 -5.245e+01
-170.000 0.000 -1.655e+01 -1.655e+01 0.000 -1.655e+01 0.000 -6.104e+01
-169.000 0.000 -1.103e+01 -1.103e+01 0.000 -1.103e+01 0.000 -5.001e+01
-168.000 0.000 -9.193e+00 -9.193e+00 0.000 -9.193e+00 0.000 -4.633e+01
-167.000 0.000 -1.047e+01 -1.047e+01 0.000 -1.047e+01 0.000 -4.889e+01
-166.000 0.000 -7.102e+00 -7.102e+00 0.000 -7.102e+00 0.000 -4.215e+01
-165.000 0.000 -6.042e+00 -6.042e+00 0.000 -6.042e+00 0.000 -4.003e+01
-164.000 0.000 -1.020e+01 -1.020e+01 0.000 -1.020e+01 0.000 -4.835e+01
-163.000 0.000 -1.396e+01 -1.396e+01 0.000 -1.396e+01 0.000 -5.586e+01
-162.000 0.000 -1.122e+01 -1.122e+01 0.000 -1.122e+01 0.000 -5.038e+01
-161.000 0.000 -1.808e+01 -1.808e+01 0.000 -1.808e+01 0.000 -6.411e+01
-160.000 0.000 -1.627e+01 -1.627e+01 0.000 -1.627e+01 0.000 -6.049e+01
-159.000 0.000 -1.098e+01 -1.098e+01 0.000 -1.098e+01 0.000 -4.990e+01
-158.000 0.000 -1.347e+01 -1.347e+01 0.000 -1.347e+01 0.000 -5.489e+01
-157.000 0.000 -9.845e+00 -9.845e+00 0.000 -9.845e+00 0.000 -4.764e+01
-156.000 0.000 -6.634e+00 -6.634e+00 0.000 -6.634e+00 0.000 -4.121e+01
-155.000 0.000 -7.991e+00 -7.991e+00 0.000 -7.991e+00 0.000 -4.393e+01
-154.000 0.000 -8.474e+00 -8.474e+00 0.000 -8.474e+00 0.000 -4.489e+01
-153.000 0.000 -5.616e+00 -5.616e+00 0.000 -5.616e+00 0.000 -3.918e+01
-152.000 0.000 -5.733e+00 -5.733e+00 0.000 -5.733e+00 0.000 -3.941e+01
-151.000 0.000 -6.616e+00 -6.616e+00 0.000 -6.616e+00 0.000 -4.118e+01
-150.000 0.000 -4.374e+00 -4.374e+00 0.000 -4.374e+00 0.000 -3.669e+01
-149.000 0.000 -3.604e+00 -3.604e+00 0.000 -3.604e+00 0.000 -3.515e+01
-148.000 0.000 -4.520e+00 -4.520e+00 0.000 -4.520e+00 0.000 -3.699e+01
-147.000 0.000 -3.349e+00 -3.349e+00 0.000 -3.349e+00 0.000 -3.464e+01
-146.000 0.000 -1.984e+00 -1.984e+00 0.000 -1.984e+00 0.000 -3.191e+01
-145.000 0.000 -2.368e+00 -2.368e+00 0.000 -2.368e+00 0.000 -3.268e+01
-144.000 0.000 -1.958e+00 -1.958e+00 0.000 -1.958e+00 0.000 -3.186e+01
-143.000 0.000 -2.759e-01 -2.759e-01 0.000 -2.759e-01 0.000 -2.850e+01
-142.000 0.000 1.502e-01 1.502e-01 0.000 1.502e-01 0.000 -2.765e+01
-141.000 0.000 1.598e-01 1.598e-01 0.000 1.598e-01 0.000 -2.763e+01
-140.000 0.000 1.530e+00 1.530e+00 0.000 1.530e+00 0.000 -2.489e+01
-139.000 0.000 2.609e+00 2.609e+00 0.000 2.609e+00 0.000 -2.273e+01
-138.000 0.000 2.622e+00 2.622e+00 0.000 2.622e+00 0.000 -2.270e+01
-137.000 0.000 2.999e+00 2.999e+00 0.000 2.999e+00 0.000 -2.195e+01
-136.000 0.000 4.030e+00 4.030e+00 0.000 4.030e+00 0.000 -1.989e+01
-135.000 0.000 4.333e+00 4.333e+00 0.000 4.333e+00 0.000 -1.928e+01
-134.000 0.000 4.090e+00 4.090e+00 0.000 4.090e+00 0.000 -1.977e+01
-133.000 0.000 4.560e+00 4.560e+00 0.000 4.560e+00 0.000 -1.883e+01
-132.000 0.000 5.185e+00 5.185e+00 0.000 5.185e+00 0.000 -1.758e+01
-131.000 0.000 4.896e+00 4.896e+00 0.000 4.896e+00 0.000 -1.815e+01
-130.000 0.000 4.199e+00 4.199e+00 0.000 4.199e+00 0.000 -1.955e+01
-129.000 0.000 4.117e+00 4.117e+00 0.000 4.117e+00 0.000 -1.971e+01
-128.000 0.000 3.910e+00 3.910e+00 0.000 3.910e+00 0.000 -2.013e+01
-127.000 0.000 2.719e+00 2.719e+00 0.000 2.719e+00 0.000 -2.251e+01
-126.000 0.000 1.410e+00 1.410e+00 0.000 1.410e+00 0.000 -2.513e+01
-125.000 0.000 9.946e-01 9.946e-01 0.000 9.946e-01 0.000 -2.596e+01
-124.000 0.000 3.146e-01 3.146e-01 0.000 3.146e-01 0.000 -2.732e+01
-123.000 0.000 -4.841e-01 -4.841e-01 0.000 -4.841e-01 0.000 -2.891e+01
-122.000 0.000 2.796e-01 2.796e-01 0.000 2.796e-01 0.000 -2.739e+01
-121.000 0.000 1.128e+00 1.128e+00 0.000 1.128e+00 0.000 -2.569e+01
-120.000 0.000 9.294e-01 9.294e-01 0.000 9.294e-01 0.000 -2.609e+01
-119.000 0.000 7.498e-01 7.498e-01 0.000 7.498e-01 0.000 -2.645e+01
-118.000 0.000 1.088e+00 1.088e+00 0.000 1.088e+00 0.000 -2.577e+01
-117.000 0.000 5.601e-01 5.601e-01 0.000 5.601e-01 0.000 -2.683e+01
-116.000 0.000 -1.273e+00 -1.273e+00 0.000 -1.273e+00 0.000 -3.049e+01
-115.000 0.000 -2.290e+00 -2.290e+00 0.000 -2.290e+00 0.000 -3.253e+01
-114.000 0.000 -1.581e+00 -1.581e+00 0.000 -1.581e+00 0.000 -3.111e+01
-113.000 0.000 -1.558e+00 -1.558e+00 0.000 -1.558e+00 0.000 -3.106e+01
-112.000 0.000 -1.883e+00 -1.883e+00 0.000 -1.883e+00 0.000 -3.171e+01
-111.000 0.000 -1.226e+00 -1.226e+00 0.000 -1.226e+00 0.000 -3.040e+01
-110.000 0.000 -9.844e-01 -9.844e-01 0.000 -9.844e-01 0.000 -2.991e+01
-109.000 0.000 -2.451e+00 -2.451e+00 0.000 -2.451e+00 0.000 -3.285e+01
-108.000 0.000 -4.458e+00 -4.458e+00 0.000 -4.458e+00 0.000 -3.686e+01
-107.000 0.000 -3.794e+00 -3.794e+00 0.000 -3.794e+00 0.000 -3.553e+01
-106.000 0.000 -2.819e+00 -2.819e+00 0.000 -2.819e+00 0.000 -3.358e+01
-105.000 0.000 -3.339e+00 -3.339e+00 0.000 -3.339e+00 0.000 -3.462e+01
-104.000 0.000 -4.159e+00 -4.159e+00 0.000 -4.159e+00 0.000 -3.626e+01
-103.000 0.000 -4.114e+00 -4.114e+00 0.000 -4.114e+00 0.000 -3.617e+01
-102.000 0.000 -4.628e+00 -4.628e+00 0.000 -4.628e+00 0.000 -3.720e+01
-101.000 0.000 -6.327e+00 -6.327e+00 0.000 -6.327e+00 0.000 -4.060e+01
-100.000 0.000 -6.501e+00 -6.501e+00 0.000 -6.501e+00 0.000 -4.095e+01
-99.000 0.000 -4.843e+00 -4.843e+00 0.000 -4.843e+00 0.000 -3.763e+01
-98.000 0.000 -4.648e+00 -4.648e+00 0.000 -4.648e+00 0.000 -3.724e+01
-97.000 0.000 -6.777e+00 -6.777e+00 0.000 -6.777e+00 0.000 -4.150e+01
-96.000 0.000 -9.393e+00 -9.393e+00 0.000 -9.393e+00 0.000 -4.673e+01
-95.000 0.000 -7.588e+00 -7.588e+00 0.000 -7.588e+00 0.000 -4.312e+01
-94.000 0.000 -5.820e+00 -5.820e+00 0.000 -5.820e+00 0.000 -3.959e+01
-93.000 0.000 -6.369e+00 -6.369e+00 0.000 -6.369e+00 0.000 -4.068e+01
-92.000 0.000 -8.774e+00 -8.774e+00 0.000 -8.774e+00 0.000 -4.549e+01
-91.000 0.000 -9.603e+00 -9.603e+00 0.000 -9.603e+00 0.000 -4.715e+01
-90.000 0.000 -7.653e+00 -7.653e+00 0.000 -7.653e+00 0.000 -4.325e+01
-89.000 0.000 -6.873e+00 -6.873e+00 0.000 -6.873e+00 0.000 -4.169e+01
-88.000 0.000 -7.836e+00 -7.836e+00 0.000 -7.836e+00 0.000 -4.362e+01
-87.000 0.000 -8.889e+00 -8.889e+00 0.000 -8.889e+00 0.000 -4.572e+01
-86.000 0.000 -8.028e+00 -8.028e+00 0.000 -8.028e+00 0.000 -4.400e+01
-85.000 0.000 -7.210e+00 -7.210e+00 0.000 -7.210e+00 0.000 -4.237e+01
-84.000 0.000 -7.863e+00 -7.863e+00 0.000 -7.863e+00 0.000 -4.367e+01
-83.000 0.000 -8.902e+00 -8.902e+00 0.000 -8.902e+00 0.000 -4.575e+01
-82.000 0.000 -7.930e+00 -7.930e+00 0.000 -7.930e+00 0.000 -4.381e+01
-81.000 0.000 -6.647e+00 -6.647e+00 0.000 -6.647e+00 0.000 -4.124e+01
-80.000 0.000 -7.130e+00 -7.130e+00 0.000 -7.130e+00 0.000 -4.221e+01
-79.000 0.000 -9.584e+00 -9.584e+00 0.000 -9.584e+00 0.000 -4.711e+01
-78.000 0.000 -1.041e+01 -1.041e+01 0.000 -1.041e+01 0.000 -4.876e+01
-77.000 0.000 -7.596e+00 -7.596e+00 0.000 -7.596e+00 0.000 -4.314e+01
-76.000 0.000 -6.301e+00 -6.301e+00 0.000 -6.301e+00 0.000 -4.055e+01
-75.000 0.000 -7.758e+00 -7.758e+00 0.000 -7.758e+00 0.000 -4.346e+01
-74.000 0.000 -1.240e+01 -1.240e+01 0.000 -1.240e+01 0.000 -5.274e+01
-73.000 0.000 -1.218e+01 -1.218e+01 0.000 -1.218e+01 0.000 -5.230e+01
-72.000 0.000 -7.992e+00 -7.992e+00 0.000 -7.992e+00 0.000 -4.393e+01
-71.000 0.000 -7.488e+00 -7.488e+00 0.000 -7.488e+00 0.000 -4.292e+01
-70.000 0.000 -1.137e+01 -1.137e+01 0.000 -1.137e+01 0.000 -5.069e+01
-69.000 0.000 -1.714e+01 -1.714e+01 0.000 -1.714e+01 0.000 -6.222e+01
-68.000 0.000 -8.581e+00 -8.581e+00 0.000 -8.581e+00 0.000 -4.511e+01
-67.000 0.000 -5.630e+00 -5.630e+00 0.000 -5.630e+00 0.000 -3.921e+01
-66.000 0.000 -6.756e+00 -6.756e+00 0.000 -6.756e+00 0.000 -4.146e+01
-65.000 0.000 -1.428e+01 -1.428e+01 0.000 -1.428e+01 0.000 -5.651e+01
-64.000 0.000 -1.473e+01 -1.473e+01 0.000 -1.473e+01 0.000 -5.740e+01
-63.000 0.000 -6.562e+00 -6.562e+00 0.000 -6.562e+00 0.000 -4.107e+01
-62.000 0.000 -5.090e+00 -5.090e+00 0.000 -5.090e+00 0.000 -3.813e+01
-61.000 0.000 -7.301e+00 -7.301e+00 0.000 -7.301e+00 0.000 -4.255e+01
-60.000 0.000 -1.223e+01 -1.223e+01 0.000 -1.223e+01 0.000 -5.240e+01
-59.000 0.000 -1.266e+01 -1.266e+01 0.000 -1.266e+01 0.000 -5.327e+01
-58.000 0.000 -9.535e+00 -9.535e+00 0.000 -9.535e+00 0.000 -4.702e+01
-57.000 0.000 -5.710e+00 -5.710e+00 0.000 -5.710e+00 0.000 -3.937e+01
-56.000 0.000 -3.220e+00 -3.220e+00 0.000 -3.220e+00 0.000 -3.439e+01
-55.000 0.000 -3.654e+00 -3.654e+00 0.000 -3.654e+00 0.000 -3.525e+01
-54.000 0.000 -7.709e+00 -7.709e+00 0.000 -7.709e+00 0.000 -4.336e+01
-53.000 0.000 -6.860e+00 -6.860e+00 0.000 -6.860e+00 0.000 -4.167e+01
-52.000 0.000 -2.514e+00 -2.514e+00 0.000 -2.514e+00 0.000 -3.297e+01
-51.000 0.000 -2.121e+00 -2.121e+00 0.000 -2.121e+00 0.000 -3.219e+01
-50.000 0.000 -5.639e+00 -5.639e+00 0.000 -5.639e+00 0.000 -3.922e+01
-49.000 0.000 -1.009e+01 -1.009e+01 0.000 -1.009e+01 0.000 -4.812e+01
-48.000 0.000 -7.318e+00 -7.318e+00 0.000 -7.318e+00 0.000 -4.258e+01
-47.000 0.000 -8.228e+00 -8.228e+00 0.000 -8.228e+00 0.000 -4.440e+01
-46.000 0.000 -1.903e+01 -1.903e+01 0.000 -1.903e+01 0.000 -6.600e+01
-45.000 0.000 -1.317e+01 -1.317e+01 0.000 -1.317e+01 0.000 -5.429e+01
-44.000 0.000 -8.085e+00 -8.085e+00 0.000 -8.085e+00 0.000 -4.412e+01
-43.000 0.000 -9.226e+00 -9.226e+00 0.000 -9.226e+00 0.000 -4.640e+01
-42.000 0.000 -1.167e+01 -1.167e+01 0.000 -1.167e+01 0.000 -5.129e+01
-41.000 0.000 -6.915e+00 -6.915e+00 0.000 -6.915e+00 0.000 -4.178e+01
-40.000 0.000 -4.011e+00 -4.011e+00 0.000 -4.011e+00 0.000 -3.597e+01
-39.000 0.000 -4.687e+00 -4.687e+00 0.000 -4.687e+00 0.000 -3.732e+01
-38.000 0.000 -1.142e+01 -1.142e+01 0.000 -1.142e+01 0.000 -5.079e+01
-37.000 0.000 -1.182e+01 -1.182e+01 0.000 -1.182e+01 0.000 -5.159e+01
-36.000 0.000 -3.504e+00 -3.504e+00 0.000 -3.504e+00 0.000 -3.495e+01
-35.000 0.000 -2.018e+00 -2.018e+00 0.000 -2.018e+00 0.000 -3.198e+01
-34.000 0.000 -4.024e+00 -4.024e+00 0.000 -4.024e+00 0.000 -3.599e+01
-33.000 0.000 -2.952e+00 -2.952e+00 0.000 -2.952e+00 0.000 -3.385e+01
-32.000 0.000 1.041e+00 1.041e+00 0.000 1.041e+00 0.000 -2.586e+01
-31.000 0.000 2.289e+00 2.289e+00 0.000 2.289e+00 0.000 -2.337e+01
-30.000 0.000 6.944e-01 6.944e-01 0.000 6.944e-01 0.000 -2.656e+01
-29.000 0.000 -1.181e+00 -1.181e+00 0.000 -1.181e+00 0.000 -3.031e+01
-28.000 0.000 2.096e+00 2.096e+00 0.000 2.096e+00 0.000 -2.375e+01
-27.000 0.000 5.137e+00 5.137e+00 0.000 5.137e+00 0.000 -1.767e+01
-26.000 0.000 6.225e+00 6.225e+00 0.000 6.225e+00 0.000 -1.550e+01
-25.000 0.000 5.747e+00 5.747e+00 0.000 5.747e+00 0.000 -1.645e+01
-24.000 0.000 4.633e+00 4.633e+00 0.000 4.633e+00 0.000 -1.868e+01
-23.000 0.000 4.565e+00 4.565e+00 0.000 4.565e+00 0.000 -1.882e+01
-22.000 0.000 5.122e+00 5.122e+00 0.000 5.122e+00 0.000 -1.770e+01
-21.000 0.000 4.465e+00 4.465e+00 0.000 4.465e+00 0.000 -1.902e+01
-20.000 0.000 1.962e+00 1.962e+00 0.000 1.962e+00 0.000 -2.402e+01
-19.000 0.000 -6.534e-01 -6.534e-01 0.000 -6.534e-01 0.000 -2.925e+01
-18.000 0.000 6.804e-01 6.804e-01 0.000 6.804e-01 0.000 -2.658e+01
-17.000 0.000 3.004e+00 3.004e+00 0.000 3.004e+00 0.000 -2.194e+01
-16.000 0.000 4.447e+00 4.447e+00 0.000 4.447e+00 0.000 -1.905e+01
-15.000 0.000 5.777e+00 5.777e+00 0.000 5.777e+00 0.000 -1.639e+01
-14.000 0.000 8.362e+00 8.362e+00 0.000 8.362e+00 0.000 -1.122e+01
-13.000 0.000 1.134e+01 1.134e+01 0.000 1.134e+01 0.000 -5.256e+00
-12.000 0.000 1.341e+01 1.341e+01 0.000 1.341e+01 0.000 -1.131e+00
-11.000 0.000 1.434e+01 1.434e+01 0.000 1.434e+01 0.000 7.430e-01
-10.000 0.000 1.442e+01 1.442e+01 0.000 1.442e+01 0.000 8.965e-01
-9.000 0.000 1.397e+01 1.397e+01 0.000 1.397e+01 0.000 -1.268e-02
-8.000 0.000 1.319e+01 1.319e+01 0.000 1.319e+01 0.000 -1.556e+00
-7.000 0.000 1.224e+01 1.224e+01 0.000 1.224e+01 0.000 -3.473e+00
-6.000 0.000 1.122e+01 1.122e+01 0.000 1.122e+01 0.000 -5.509e+00
-5.000 0.000 1.020e+01 1.020e+01 0.000 1.020e+01 0.000 -7.540e+00
-4.000 0.000 9.218e+00 9.218e+00 0.000 9.218e+00 0.000 -9.509e+00
-3.000 0.000 8.351e+00 8.351e+00 0.000 8.351e+00 0.000 -1.124e+01
-2.000 0.000 7.688e+00 7.688e+00 0.000 7.688e+00 0.000 -1.257e+01
-1.000 0.000 7.255e+00 7.255e+00 0.000 7.255e+00 0.000 -1.344e+01
0.000 0.000 6.950e+00 6.950e+00 0.000 6.950e+00 0.000 -1.405e+01
1.000 0.000 6.713e+00 6.713e+00 0.000 6.713e+00 0.000 -1.452e+01
2.000 0.000 6.668e+00 6.668e+00 0.000 6.668e+00 0.000 -1.461e+01
3.000 0.000 6.939e+00 6.939e+00 0.000 6.939e+00 0.000 -1.407e+01
4.000 0.000 7.552e+00 7.552e+00 0.000 7.552e+00 0.000 -1.284e+01
5.000 0.000 8.308e+00 8.308e+00 0.000 8.308e+00 0.000 -1.133e+01
6.000 0.000 8.762e+00 8.762e+00 0.000 8.762e+00 0.000 -1.042e+01
7.000 0.000 8.690e+00 8.690e+00 0.000 8.690e+00 0.000 -1.057e+01
8.000 0.000 8.342e+00 8.342e+00 0.000 8.342e+00 0.000 -1.126e+01
9.000 0.000 8.257e+00 8.257e+00 0.000 8.257e+00 0.000 -1.143e+01
10.000 0.000 8.683e+00 8.683e+00 0.000 8.683e+00 0.000 -1.058e+01
11.000 0.000 9.141e+00 9.141e+00 0.000 9.141e+00 0.000 -9.664e+00
12.000 0.000 8.982e+00 8.982e+00 0.000 8.982e+00 0.000 -9.981e+00
13.000 0.000 8.032e+00 8.032e+00 0.000 8.032e+00 0.000 -1.188e+01
14.000 0.000 6.777e+00 6.777e+00 0.000 6.777e+00 0.000 -1.439e+01
15.000 0.000 5.915e+00 5.915e+00 0.000 5.915e+00 0.000 -1.612e+01
16.000 0.000 5.263e+00 5.263e+00 0.000 5.263e+00 0.000 -1.742e+01
17.000 0.000 4.200e+00 4.200e+00 0.000 4.200e+00 0.000 -1.954e+01
18.000 0.000 3.031e+00 3.031e+00 0.000 3.031e+00 0.000 -2.188e+01
19.000 0.000 3.170e+00 3.170e+00 0.000 3.170e+00 0.000 -2.161e+01
20.000 0.000 4.144e+00 4.144e+00 0.000 4.144e+00 0.000 -1.966e+01
21.000 0.000 4.419e+00 4.419e+00 0.000 4.419e+00 0.000 -1.911e+01
22.000 0.000 4.189e+00 4.189e+00 0.000 4.189e+00 0.000 -1.957e+01
23.000 0.000 4.193e+00 4.193e+00 0.000 4.193e+00 0.000 -1.956e+01
24.000 0.000 3.442e+00 3.442e+00 0.000 3.442e+00 0.000 -2.106e+01
25.000 0.000 3.331e-01 3.331e-01 0.000 3.331e-01 0.000 -2.728e+01
26.000 0.000 -2.843e+00 -2.843e+00 0.000 -2.843e+00 0.000 -3.363e+01
27.000 0.000 1.055e-01 1.055e-01 0.000 1.055e-01 0.000 -2.773e+01
28.000 0.000 1.071e+00 1.071e+00 0.000 1.071e+00 0.000 -2.580e+01
29.000 0.000 1.035e+00 1.035e+00 0.000 1.035e+00 0.000 -2.588e+01
30.000 0.000 4.270e+00 4.270e+00 0.000 4.270e+00 0.000 -1.941e+01
31.000 0.000 6.998e+00 6.998e+00 0.000 6.998e+00 0.000 -1.395e+01
32.000 0.000 7.460e+00 7.460e+00 0.000 7.460e+00 0.000 -1.303e+01
33.000 0.000 5.824e+00 5.824e+00 0.000 5.824e+00 0.000 -1.630e+01
34.000 0.000 2.957e+00 2.957e+00 0.000 2.957e+00 0.000 -2.203e+01
35.000 0.000 8.962e-01 8.962e-01 0.000 8.962e-01 0.000 -2.615e+01
36.000 0.000 -1.017e+00 -1.017e+00 0.000 -1.017e+00 0.000 -2.998e+01
37.000 0.000 -6.176e+00 -6.176e+00 0.000 -6.176e+00 0.000 -4.030e+01
38.000 0.000 -9.286e+00 -9.286e+00 0.000 -9.286e+00 0.000 -4.652e+01
39.000 0.000 -3.386e+00 -3.386e+00 0.000 -3.386e+00 0.000 -3.472e+01
40.000 0.000 -2.093e+00 -2.093e+00 0.000 -2.093e+00 0.000 -3.213e+01
41.000 0.000 -4.460e+00 -4.460e+00 0.000 -4.460e+00 0.000 -3.686e+01
42.000 0.000 -1.006e+01 -1.006e+01 0.000 -1.006e+01 0.000 -4.806e+01
43.000 0.000 -8.153e+00 -8.153e+00 0.000 -8.153e+00 0.000 -4.425e+01
44.000 0.000 -5.600e+00 -5.600e+00 0.000 -5.600e+00 0.000 -3.915e+01
45.000 0.000 -8.240e+00 -8.240e+00 0.000 -8.240e+00 0.000 -4.443e+01
46.000 0.000 -2.415e+01 -2.415e+01 0.000 -2.415e+01 0.000 -7.625e+01
47.000 0.000 -7.355e+00 -7.355e+00 0.000 -7.355e+00 0.000 -4.266e+01
48.000 0.000 -3.990e+00 -3.990e+00 0.000 -3.990e+00 0.000 -3.593e+01
49.000 0.000 -6.348e+00 -6.348e+00 0.000 -6.348e+00 0.000 -4.064e+01
50.000 0.000 -2.287e+01 -2.287e+01 0.000 -2.287e+01 0.000 -7.369e+01
51.000 0.000 -8.382e+00 -8.382e+00 0.000 -8.382e+00 0.000 -4.471e+01
52.000 0.000 -5.071e+00 -5.071e+00 0.000 -5.071e+00 0.000 -3.809e+01
53.000 0.000 -8.509e+00 -8.509e+00 0.000 -8.509e+00 0.000 -4.496e+01
54.000 0.000 -2.731e+01 -2.731e+01 0.000 -2.731e+01 0.000 -8.257e+01
55.000 0.000 -7.554e+00 -7.554e+00 0.000 -7.554e+00 0.000 -4.305e+01
56.000 0.000 -5.332e+00 -5.332e+00 0.000 -5.332e+00 0.000 -3.861e+01
57.000 0.000 -8.559e+00 -8.559e+00 0.000 -8.559e+00 0.000 -4.506e+01
58.000 0.000 -1.470e+01 -1.470e+01 0.000 -1.470e+01 0.000 -5.735e+01
59.000 0.000 -8.940e+00 -8.940e+00 0.000 -8.940e+00 0.000 -4.583e+01
60.000 0.000 -7.263e+00 -7.263e+00 0.000 -7.263e+00 0.000 -4.247e+01
61.000 0.000 -9.037e+00 -9.037e+00 0.000 -9.037e+00 0.000 -4.602e+01
62.000 0.000 -1.107e+01 -1.107e+01 0.000 -1.107e+01 0.000 -5.009e+01
63.000 0.000 -1.104e+01 -1.104e+01 0.000 -1.104e+01 0.000 -5.003e+01
64.000 0.000 -1.202e+01 -1.202e+01 0.000 -1.202e+01 0.000 -5.198e+01
65.000 0.000 -1.223e+01 -1.223e+01 0.000 -1.223e+01 0.000 -5.241e+01
66.000 0.000 -9.910e+00 -9.910e+00 0.000 -9.910e+00 0.000 -4.777e+01
67.000 0.000 -9.433e+00 -9.433e+00 0.000 -9.433e+00 0.000 -4.681e+01
68.000 0.000 -1.280e+01 -1.280e+01 0.000 -1.280e+01 0.000 -5.356e+01
69.000 0.000 -1.671e+01 -1.671e+01 0.000 -1.671e+01 0.000 -6.137e+01
70.000 0.000 -9.583e+00 -9.583e+00 0.000 -9.583e+00 0.000 -4.711e+01
71.000 0.000 -6.623e+00 -6.623e+00 0.000 -6.623e+00 0.000 -4.119e+01
72.000 0.000 -7.217e+00 -7.217e+00 0.000 -7.217e+00 0.000 -4.238e+01
73.000 0.000 -1.148e+01 -1.148e+01 0.000 -1.148e+01 0.000 -5.091e+01
74.000 0.000 -1.409e+01 -1.409e+01 0.000 -1.409e+01 0.000 -5.613e+01
75.000 0.000 -9.090e+00 -9.090e+00 0.000 -9.090e+00 0.000 -4.613e+01
76.000 0.000 -7.239e+00 -7.239e+00 0.000 -7.239e+00 0.000 -4.242e+01
77.000 0.000 -7.585e+00 -7.585e+00 0.000 -7.585e+00 0.000 -4.312e+01
78.000 0.000 -8.275e+00 -8.275e+00 0.000 -8.275e+00 0.000 -4.450e+01
79.000 0.000 -8.374e+00 -8.374e+00 0.000 -8.374e+00 0.000 -4.469e+01
80.000 0.000 -8.834e+00 -8.834e+00 0.000 -8.834e+00 0.000 -4.561e+01
81.000 0.000 -9.109e+00 -9.109e+00 0.000 -9.109e+00 0.000 -4.616e+01
82.000 0.000 -7.662e+00 -7.662e+00 0.000 -7.662e+00 0.000 -4.327e+01
83.000 0.000 -6.335e+00 -6.335e+00 0.000 -6.335e+00 0.000 -4.062e+01
84.000 0.000 -6.775e+00 -6.775e+00 0.000 -6.775e+00 0.000 -4.150e+01
85.000 0.000 -9.168e+00 -9.168e+00 0.000 -9.168e+00 0.000 -4.628e+01
86.000 0.000 -1.029e+01 -1.029e+01 0.000 -1.029e+01 0.000 -4.852e+01
87.000 0.000 -7.475e+00 -7.475e+00 0.000 -7.475e+00 0.000 -4.290e+01
88.000 0.000 -5.774e+00 -5.774e+00 0.000 -5.774e+00 0.000 -3.949e+01
89.000 0.000 -6.461e+00 -6.461e+00 0.000 -6.461e+00 0.000 -4.087e+01
90.000 0.000 -9.743e+00 -9.743e+00 0.000 -9.743e+00 0.000 -4.743e+01
91.000 0.000 -1.120e+01 -1.120e+01 0.000 -1.120e+01 0.000 -5.035e+01
92.000 0.000 -6.898e+00 -6.898e+00 0.000 -6.898e+00 0.000 -4.174e+01
93.000 0.000 -4.712e+00 -4.712e+00 0.000 -4.712e+00 0.000 -3.737e+01
94.000 0.000 -5.441e+00 -5.441e+00 0.000 -5.441e+00 0.000 -3.883e+01
95.000 0.000 -9.637e+00 -9.637e+00 0.000 -9.637e+00 0.000 -4.722e+01
96.000 0.000 -1.072e+01 -1.072e+01 0.000 -1.072e+01 0.000 -4.939e+01
97.000 0.000 -5.120e+00 -5.120e+00 0.000 -5.120e+00 0.000 -3.819e+01
98.000 0.000 -3.079e+00 -3.079e+00 0.000 -3.079e+00 0.000 -3.410e+01
99.000 0.000 -4.256e+00 -4.256e+00 0.000 -4.256e+00 0.000 -3.646e+01
100.000 0.000 -8.190e+00 -8.190e+00 0.000 -8.190e+00 0.000 -4.432e+01
101.000 0.000 -7.422e+00 -7.422e+00 0.000 -7.422e+00 0.000 -4.279e+01
102.000 0.000 -3.934e+00 -3.934e+00 0.000 -3.934e+00 0.000 -3.581e+01
103.000 0.000 -3.076e+00 -3.076e+00 0.000 -3.076e+00 0.000 -3.410e+01
104.000 0.000 -3.543e+00 -3.543e+00 0.000 -3.543e+00 0.000 -3.503e+01
105.000 0.000 -3.296e+00 -3.296e+00 0.000 -3.296e+00 0.000 -3.454e+01
106.000 0.000 -3.187e+00 -3.187e+00 0.000 -3.187e+00 0.000 -3.432e+01
107.000 0.000 -4.790e+00 -4.790e+00 0.000 -4.790e+00 0.000 -3.753e+01
108.000 0.000 -4.886e+00 -4.886e+00 0.000 -4.886e+00 0.000 -3.772e+01
109.000 0.000 -1.572e+00 -1.572e+00 0.000 -1.572e+00 0.000 -3.109e+01
110.000 0.000 4.125e-02 4.125e-02 0.000 4.125e-02 0.000 -2.786e+01
111.000 0.000 -6.567e-01 -6.567e-01 0.000 -6.567e-01 0.000 -2.926e+01
112.000 0.000 -2.218e+00 -2.218e+00 0.000 -2.218e+00 0.000 -3.238e+01
113.000 0.000 -2.278e+00 -2.278e+00 0.000 -2.278e+00 0.000 -3.250e+01
114.000 0.000 -2.295e+00 -2.295e+00 0.000 -2.295e+00 0.000 -3.254e+01
115.000 0.000 -2.658e+00 -2.658e+00 0.000 -2.658e+00 0.000 -3.326e+01
116.000 0.000 -6.649e-01 -6.649e-01 0.000 -6.649e-01 0.000 -2.928e+01
117.000 0.000 1.396e+00 1.396e+00 0.000 1.396e+00 0.000 -2.515e+01
118.000 0.000 1.642e+00 1.642e+00 0.000 1.642e+00 0.000 -2.466e+01
119.000 0.000 8.610e-01 8.610e-01 0.000 8.610e-01 0.000 -2.622e+01
120.000 0.000 8.727e-01 8.727e-01 0.000 8.727e-01 0.000 -2.620e+01
121.000 0.000 9.456e-01 9.456e-01 0.000 9.456e-01 0.000 -2.605e+01
122.000 0.000 -3.461e-01 -3.461e-01 0.000 -3.461e-01 0.000 -2.864e+01
123.000 0.000 -1.111e+00 -1.111e+00 0.000 -1.111e+00 0.000 -3.017e+01
124.000 0.000 3.692e-01 3.692e-01 0.000 3.692e-01 0.000 -2.721e+01
125.000 0.000 1.120e+00 1.120e+00 0.000 1.120e+00 0.000 -2.570e+01
126.000 0.000 1.429e+00 1.429e+00 0.000 1.429e+00 0.000 -2.509e+01
127.000 0.000 3.062e+00 3.062e+00 0.000 3.062e+00 0.000 -2.182e+01
128.000 0.000 4.447e+00 4.447e+00 0.000 4.447e+00 0.000 -1.905e+01
129.000 0.000 4.465e+00 4.465e+00 0.000 4.465e+00 0.000 -1.902e+01
130.000 0.000 4.157e+00 4.157e+00 0.000 4.157e+00 0.000 -1.963e+01
131.000 0.000 4.765e+00 4.765e+00 0.000 4.765e+00 0.000 -1.841e+01
132.000 0.000 5.178e+00 5.178e+00 0.000 5.178e+00 0.000 -1.759e+01
133.000 0.000 4.724e+00 4.724e+00 0.000 4.724e+00 0.000 -1.850e+01
134.000 0.000 4.435e+00 4.435e+00 0.000 4.435e+00 0.000 -1.908e+01
135.000 0.000 4.587e+00 4.587e+00 0.000 4.587e+00 0.000 -1.877e+01
136.000 0.000 3.933e+00 3.933e+00 0.000 3.933e+00 0.000 -2.008e+01
137.000 0.000 2.658e+00 2.658e+00 0.000 2.658e+00 0.000 -2.263e+01
138.000 0.000 2.545e+00 2.545e+00 0.000 2.545e+00 0.000 -2.286e+01
139.000 0.000 2.582e+00 2.582e+00 0.000 2.582e+00 0.000 -2.278e+01
140.000 0.000 1.071e+00 1.071e+00 0.000 1.071e+00 0.000 -2.580e+01
141.000 0.000 -4.023e-01 -4.023e-01 0.000 -4.023e-01 0.000 -2.875e+01
142.000 0.000 1.713e-01 1.713e-01 0.000 1.713e-01 0.000 -2.760e+01
143.000 0.000 -4.215e-01 -4.215e-01 0.000 -4.215e-01 0.000 -2.879e+01
144.000 0.000 -2.951e+00 -2.951e+00 0.000 -2.951e+00 0.000 -3.385e+01
145.000 0.000 -2.903e+00 -2.903e+00 0.000 -2.903e+00 0.000 -3.375e+01
146.000 0.000 -1.983e+00 -1.983e+00 0.000 -1.983e+00 0.000 -3.191e+01
147.000 0.000 -4.177e+00 -4.177e+00 0.000 -4.177e+00 0.000 -3.630e+01
148.000 0.000 -6.472e+00 -6.472e+00 0.000 -6.472e+00 0.000 -4.089e+01
149.000 0.000 -4.277e+00 -4.277e+00 0.000 -4.277e+00 0.000 -3.650e+01
150.000 0.000 -4.937e+00 -4.937e+00 0.000 -4.937e+00 0.000 -3.782e+01
151.000 0.000 -8.840e+00 -8.840e+00 0.000 -8.840e+00 0.000 -4.563e+01
152.000 0.000 -7.171e+00 -7.171e+00 0.000 -7.171e+00 0.000 -4.229e+01
153.000 0.000 -6.100e+00 -6.100e+00 0.000 -6.100e+00 0.000 -4.015e+01
154.000 0.000 -9.037e+00 -9.037e+00 0.000 -9.037e+00 0.000 -4.602e+01
155.000 0.000 -8.871e+00 -8.871e+00 0.000 -8.871e+00 0.000 -4.569e+01
156.000 0.000 -7.563e+00 -7.563e+00 0.000 -7.563e+00 0.000 -4.307e+01
157.000 0.000 -1.176e+01 -1.176e+01 0.000 -1.176e+01 0.000 -5.146e+01
158.000 0.000 -1.469e+01 -1.469e+01 0.000 -1.469e+01 0.000 -5.733e+01
159.000 0.000 -1.094e+01 -1.094e+01 0.000 -1.094e+01 0.000 -4.983e+01
160.000 0.000 -1.674e+01 -1.674e+01 0.000 -1.674e+01 0.000 -6.142e+01
161.000 0.000 -1.741e+01 -1.741e+01 0.000 -1.741e+01 0.000 -6.276e+01
162.000 0.000 -1.127e+01 -1.127e+01 0.000 -1.127e+01 0.000 -5.049e+01
163.000 0.000 -1.524e+01 -1.524e+01 0.000 -1.524e+01 0.000 -5.843e+01
164.000 0.000 -1.117e+01 -1.117e+01 0.000 -1.117e+01 0.000 -5.028e+01
165.000 0.000 -7.093e+00 -7.093e+00 0.000 -7.093e+00 0.000 -4.213e+01
166.000 0.000 -9.167e+00 -9.167e+00 0.000 -9.167e+00 0.000 -4.628e+01
167.000 0.000 -1.311e+01 -1.311e+01 0.000 -1.311e+01 0.000 -5.416e+01
168.000 0.000 -9.968e+00 -9.968e+00 0.000 -9.968e+00 0.000 -4.788e+01
169.000 0.000 -1.252e+01 -1.252e+01 0.000 -1.252e+01 0.000 -5.299e+01
170.000 0.000 -1.804e+01 -1.804e+01 0.000 -1.804e+01 0.000 -6.403e+01
171.000 0.000 -1.257e+01 -1.257e+01 0.000 -1.257e+01 0.000 -5.309e+01
172.000 0.000 -1.611e+01 -1.611e+01 0.000 -1.611e+01 0.000 -6.016e+01
173.000 0.000 -1.180e+01 -1.180e+01 0.000 -1.180e+01 0.000 -5.154e+01
174.000 0.000 -7.744e+00 -7.744e+00 0.000 -7.744e+00 0.000 -4.343e+01
175.000 0.000 -1.043e+01 -1.043e+01 0.000 -1.043e+01 0.000 -4.880e+01
176.000 0.000 -2.710e+01 -2.710e+01 0.000 -2.710e+01 0.000 -8.215e+01
177.000 0.000 -1.926e+01 -1.926e+01 0.000 -1.926e+01 0.000 -6.646e+01
178.000 0.000 -2.762e+01 -2.762e+01 0.000 -2.762e+01 0.000 -8.318e+01
179.000 0.000 -1.079e+01 -1.079e+01 0.000 -1.079e+01 0.000 -4.953e+01
