# Supplementary material
Source: publisher figshare collection journal article supplement (https://frontiersin.figshare.com/ndownloader/files/24979811)
Supplement: Supplementary file 1 [file 24979811 › datasheet/azimuth plane/0.csv]

Theta [deg.] Phi [deg.] Abs(Gain)[dB ] Abs(Theta)[dB ] Phase(Theta)[deg.] Abs(Phi )[dB ] Phase(Phi )[deg.] Ax.Ratio[dB ]
------------------------------------------------------------------------------------------------------------------------------------------------------
-180.000 90.000 -8.055e+00 -3.821e+01 273.741 -8.060e+00 170.230 3.039e+01
-179.000 90.000 -8.503e+00 -3.166e+01 330.265 -8.524e+00 181.179 2.895e+01
-178.000 90.000 -9.067e+00 -3.134e+01 331.667 -9.093e+00 199.731 2.484e+01
-177.000 90.000 -9.430e+00 -3.685e+01 295.858 -9.438e+00 206.939 2.741e+01
-176.000 90.000 -9.897e+00 -3.484e+01 227.148 -9.911e+00 193.460 3.006e+01
-175.000 90.000 -9.165e+00 -3.337e+01 220.252 -9.181e+00 173.868 2.701e+01
-174.000 90.000 -8.405e+00 -3.600e+01 245.563 -8.413e+00 170.602 2.789e+01
-173.000 90.000 -8.312e+00 -3.690e+01 284.506 -8.318e+00 185.897 2.868e+01
-172.000 90.000 -7.704e+00 -3.875e+01 287.762 -7.708e+00 206.785 3.115e+01
-171.000 90.000 -7.561e+00 -4.119e+01 244.903 -7.562e+00 217.431 4.000e+01
-170.000 90.000 -9.247e+00 -3.832e+01 234.556 -9.253e+00 216.566 3.928e+01
-169.000 90.000 -1.213e+01 -3.386e+01 266.472 -1.216e+01 207.841 2.309e+01
-168.000 90.000 -1.330e+01 -2.924e+01 282.555 -1.341e+01 206.902 1.612e+01
-167.000 90.000 -1.107e+01 -2.805e+01 284.682 -1.116e+01 222.015 1.796e+01
-166.000 90.000 -8.334e+00 -3.123e+01 280.841 -8.356e+00 235.248 2.582e+01
-165.000 90.000 -7.618e+00 -4.309e+01 266.399 -7.619e+00 248.994 4.000e+01
-164.000 90.000 -8.577e+00 -4.529e+01 113.413 -8.578e+00 274.634 4.000e+01
-163.000 90.000 -8.327e+00 -5.049e+01 189.291 -8.327e+00 310.649 4.000e+01
-162.000 90.000 -7.346e+00 -3.524e+01 246.136 -7.354e+00 334.147 2.789e+01
-161.000 90.000 -8.494e+00 -3.132e+01 245.565 -8.517e+00 348.155 2.301e+01
-160.000 90.000 -1.257e+01 -3.354e+01 247.602 -1.261e+01 6.106 2.207e+01
-159.000 90.000 -1.828e+01 -4.252e+01 298.009 -1.829e+01 43.613 2.455e+01
-158.000 90.000 -2.296e+01 -3.745e+01 13.443 -2.312e+01 81.629 1.503e+01
-157.000 90.000 -3.721e+01 -3.866e+01 36.672 -4.267e+01 357.878 1.018e+01
-156.000 90.000 -2.263e+01 -3.886e+01 128.620 -2.274e+01 312.553 3.960e+01
-155.000 90.000 -1.879e+01 -3.122e+01 158.060 -1.904e+01 344.475 3.172e+01
-154.000 90.000 -1.515e+01 -2.860e+01 168.114 -1.536e+01 23.892 1.818e+01
-153.000 90.000 -1.212e+01 -2.830e+01 179.047 -1.223e+01 50.085 1.834e+01
-152.000 90.000 -1.100e+01 -2.964e+01 188.078 -1.106e+01 73.691 1.942e+01
-151.000 90.000 -1.071e+01 -3.562e+01 192.215 -1.072e+01 103.100 2.489e+01
-150.000 90.000 -1.028e+01 -3.883e+01 354.589 -1.028e+01 134.459 3.237e+01
-149.000 90.000 -1.016e+01 -2.789e+01 350.879 -1.024e+01 167.301 4.000e+01
-148.000 90.000 -9.492e+00 -2.505e+01 340.385 -9.615e+00 206.381 1.842e+01
-147.000 90.000 -7.615e+00 -2.586e+01 329.065 -7.680e+00 239.410 1.818e+01
-146.000 90.000 -6.474e+00 -3.018e+01 319.590 -6.492e+00 263.468 2.532e+01
-145.000 90.000 -6.524e+00 -4.025e+01 314.360 -6.526e+00 289.915 4.000e+01
-144.000 90.000 -6.230e+00 -4.614e+01 178.249 -6.230e+00 323.408 4.000e+01
-143.000 90.000 -4.990e+00 -3.390e+01 182.139 -4.995e+00 353.632 4.000e+01
-142.000 90.000 -4.174e+00 -2.785e+01 177.598 -4.192e+00 18.808 3.253e+01
-141.000 90.000 -3.883e+00 -2.520e+01 164.005 -3.915e+00 45.847 2.239e+01
-140.000 90.000 -3.291e+00 -2.541e+01 145.380 -3.318e+00 74.825 2.260e+01
-139.000 90.000 -2.509e+00 -2.884e+01 120.428 -2.519e+00 101.171 3.597e+01
-138.000 90.000 -2.036e+00 -3.675e+01 62.154 -2.038e+00 126.275 3.563e+01
-137.000 90.000 -1.614e+00 -3.318e+01 327.001 -1.617e+00 152.582 4.000e+01
-136.000 90.000 -9.822e-01 -2.905e+01 304.458 -9.890e-01 178.034 2.995e+01
-135.000 90.000 -4.818e-01 -2.728e+01 300.233 -4.908e-01 201.187 2.690e+01
-134.000 90.000 -3.073e-01 -2.580e+01 300.126 -3.195e-01 223.842 2.574e+01
-133.000 90.000 -2.891e-01 -2.473e+01 295.283 -3.048e-01 246.823 2.696e+01
-132.000 90.000 -4.444e-01 -2.491e+01 285.457 -4.600e-01 269.197 3.554e+01
-131.000 90.000 -9.934e-01 -2.693e+01 274.324 -1.004e+00 291.785 3.640e+01
-130.000 90.000 -1.772e+00 -3.151e+01 268.538 -1.776e+00 316.798 3.228e+01
-129.000 90.000 -2.327e+00 -3.889e+01 296.799 -2.328e+00 342.825 3.942e+01
-128.000 90.000 -2.957e+00 -3.658e+01 351.608 -2.959e+00 5.798 4.000e+01
-127.000 90.000 -4.564e+00 -3.322e+01 356.153 -4.570e+00 26.803 3.451e+01
-126.000 90.000 -7.679e+00 -3.171e+01 350.093 -7.696e+00 53.341 2.501e+01
-125.000 90.000 -1.129e+01 -3.071e+01 339.160 -1.134e+01 98.319 2.057e+01
-124.000 90.000 -1.182e+01 -2.995e+01 323.098 -1.189e+01 156.434 3.092e+01
-123.000 90.000 -1.015e+01 -2.981e+01 303.984 -1.020e+01 203.742 1.975e+01
-122.000 90.000 -8.040e+00 -3.100e+01 285.800 -8.062e+00 240.757 2.597e+01
-121.000 90.000 -6.213e+00 -3.478e+01 276.395 -6.219e+00 268.682 4.000e+01
-120.000 90.000 -5.281e+00 -4.041e+01 318.566 -5.282e+00 290.999 4.000e+01
-119.000 90.000 -5.368e+00 -3.387e+01 355.688 -5.374e+00 311.547 3.164e+01
-118.000 90.000 -6.474e+00 -2.995e+01 345.946 -6.493e+00 332.476 3.615e+01
-117.000 90.000 -8.910e+00 -2.890e+01 327.216 -8.954e+00 356.127 2.633e+01
-116.000 90.000 -1.329e+01 -2.970e+01 303.820 -1.340e+01 33.337 1.631e+01
-115.000 90.000 -1.495e+01 -3.157e+01 276.708 -1.505e+01 108.697 3.036e+01
-114.000 90.000 -1.050e+01 -3.359e+01 251.438 -1.052e+01 156.366 2.311e+01
-113.000 90.000 -7.942e+00 -3.510e+01 240.578 -7.951e+00 180.360 2.838e+01
-112.000 90.000 -7.278e+00 -3.466e+01 247.534 -7.286e+00 200.209 3.005e+01
-111.000 90.000 -7.996e+00 -3.218e+01 251.233 -8.013e+00 221.014 3.016e+01
-110.000 90.000 -1.002e+01 -3.013e+01 243.361 -1.006e+01 245.591 4.000e+01
-109.000 90.000 -1.348e+01 -2.929e+01 227.008 -1.360e+01 282.233 1.748e+01
-108.000 90.000 -1.509e+01 -2.932e+01 202.573 -1.525e+01 347.447 1.909e+01
-107.000 90.000 -1.155e+01 -2.924e+01 170.835 -1.162e+01 36.509 2.060e+01
-106.000 90.000 -9.095e+00 -2.839e+01 138.425 -9.146e+00 61.317 1.948e+01
-105.000 90.000 -8.712e+00 -2.743e+01 111.001 -8.771e+00 79.966 2.450e+01
-104.000 90.000 -1.030e+01 -2.717e+01 86.982 -1.039e+01 100.529 2.956e+01
-103.000 90.000 -1.378e+01 -2.791e+01 61.848 -1.395e+01 133.464 1.445e+01
-102.000 90.000 -1.593e+01 -2.933e+01 30.464 -1.613e+01 196.396 2.587e+01
-101.000 90.000 -1.274e+01 -3.023e+01 351.595 -1.282e+01 247.585 1.768e+01
-100.000 90.000 -1.024e+01 -2.996e+01 315.179 -1.029e+01 273.571 2.328e+01
-99.000 90.000 -9.805e+00 -2.985e+01 287.396 -9.848e+00 291.425 4.000e+01
-98.000 90.000 -1.183e+01 -3.099e+01 264.008 -1.188e+01 309.436 2.210e+01
-97.000 90.000 -1.725e+01 -3.365e+01 237.443 -1.735e+01 347.514 1.687e+01
-96.000 90.000 -1.618e+01 -3.664e+01 197.087 -1.622e+01 72.500 2.214e+01
-95.000 90.000 -1.114e+01 -3.658e+01 152.780 -1.115e+01 101.146 2.755e+01
-94.000 90.000 -9.876e+00 -3.524e+01 128.205 -9.888e+00 112.416 3.668e+01
-93.000 90.000 -1.215e+01 -3.499e+01 114.796 -1.217e+01 122.851 3.993e+01
-92.000 90.000 -2.001e+01 -3.621e+01 100.431 -2.012e+01 159.402 1.749e+01
-91.000 90.000 -1.615e+01 -3.876e+01 69.932 -1.618e+01 260.178 3.763e+01
-90.000 90.000 -1.106e+01 -3.859e+01 13.241 -1.107e+01 276.379 2.759e+01
-89.000 90.000 -1.069e+01 -3.494e+01 332.665 -1.071e+01 282.161 2.650e+01
-88.000 90.000 -1.473e+01 -3.294e+01 306.096 -1.480e+01 291.440 3.020e+01
-87.000 90.000 -2.344e+01 -3.322e+01 277.339 -2.392e+01 15.016 9.401e+00
-86.000 90.000 -1.413e+01 -3.487e+01 232.567 -1.417e+01 72.905 2.995e+01
-85.000 90.000 -1.137e+01 -3.405e+01 173.403 -1.139e+01 79.196 2.268e+01
-84.000 90.000 -1.306e+01 -3.165e+01 130.040 -1.312e+01 83.619 2.139e+01
-83.000 90.000 -2.051e+01 -3.103e+01 96.104 -2.092e+01 109.304 2.371e+01
-82.000 90.000 -1.847e+01 -3.257e+01 56.646 -1.864e+01 213.413 2.230e+01
-81.000 90.000 -1.345e+01 -3.425e+01 358.091 -1.349e+01 228.314 2.308e+01
-80.000 90.000 -1.356e+01 -3.295e+01 299.732 -1.361e+01 234.324 2.019e+01
-79.000 90.000 -1.766e+01 -3.235e+01 257.832 -1.781e+01 253.107 3.652e+01
-78.000 90.000 -2.047e+01 -3.484e+01 214.110 -2.063e+01 318.048 1.449e+01
-77.000 90.000 -1.741e+01 -3.835e+01 132.834 -1.744e+01 356.029 2.424e+01
-76.000 90.000 -1.755e+01 -3.430e+01 55.223 -1.764e+01 20.910 2.177e+01
-75.000 90.000 -1.716e+01 -3.199e+01 6.209 -1.731e+01 63.276 1.629e+01
-74.000 90.000 -1.417e+01 -3.164e+01 310.869 -1.425e+01 85.403 2.041e+01
-73.000 90.000 -1.394e+01 -2.989e+01 248.107 -1.405e+01 82.742 2.800e+01
-72.000 90.000 -1.933e+01 -2.728e+01 197.750 -2.009e+01 54.858 1.264e+01
-71.000 90.000 -1.735e+01 -2.605e+01 155.547 -1.798e+01 284.350 1.079e+01
-70.000 90.000 -1.026e+01 -2.628e+01 111.953 -1.037e+01 252.614 2.001e+01
-69.000 90.000 -8.362e+00 -2.712e+01 62.478 -8.421e+00 230.937 3.279e+01
-68.000 90.000 -1.025e+01 -2.773e+01 11.280 -1.033e+01 204.863 3.013e+01
-67.000 90.000 -1.630e+01 -2.880e+01 324.929 -1.655e+01 149.776 3.421e+01
-66.000 90.000 -1.439e+01 -3.195e+01 282.415 -1.447e+01 51.856 1.979e+01
-65.000 90.000 -1.135e+01 -4.078e+01 234.473 -1.135e+01 12.737 3.297e+01
-64.000 90.000 -1.410e+01 -4.206e+01 43.205 -1.411e+01 344.625 2.934e+01
-63.000 90.000 -2.878e+01 -3.413e+01 348.886 -3.028e+01 211.953 9.170e+00
-62.000 90.000 -1.202e+01 -3.150e+01 295.349 -1.207e+01 134.269 2.929e+01
-61.000 90.000 -8.442e+00 -2.962e+01 239.067 -8.475e+00 109.775 2.340e+01
-60.000 90.000 -9.486e+00 -2.803e+01 188.880 -9.547e+00 85.296 1.873e+01
-59.000 90.000 -1.571e+01 -2.793e+01 146.430 -1.598e+01 50.005 1.201e+01
-58.000 90.000 -1.983e+01 -3.051e+01 107.222 -2.021e+01 287.039 4.000e+01
-57.000 90.000 -1.453e+01 -3.829e+01 62.239 -1.455e+01 247.208 4.000e+01
-56.000 90.000 -1.519e+01 -4.599e+01 242.915 -1.519e+01 248.256 4.000e+01
-55.000 90.000 -1.498e+01 -3.769e+01 166.159 -1.500e+01 277.583 2.332e+01
-54.000 90.000 -1.359e+01 -3.406e+01 91.972 -1.362e+01 286.268 3.266e+01
-53.000 90.000 -1.931e+01 -3.043e+01 29.821 -1.966e+01 290.044 1.092e+01
-52.000 90.000 -1.481e+01 -2.901e+01 334.467 -1.498e+01 46.063 1.452e+01
-51.000 90.000 -7.071e+00 -2.897e+01 268.099 -7.099e+00 29.392 2.325e+01
-50.000 90.000 -5.414e+00 -2.688e+01 195.488 -5.445e+00 353.141 2.988e+01
-49.000 90.000 -5.529e+00 -2.416e+01 138.427 -5.589e+00 286.723 2.425e+01
-48.000 90.000 -9.985e-01 -2.304e+01 88.460 -1.026e+00 215.751 2.402e+01
-47.000 90.000 3.185e+00 -2.297e+01 35.405 3.175e+00 172.126 2.943e+01
-46.000 90.000 4.797e+00 -2.240e+01 340.752 4.789e+00 137.511 3.528e+01
-45.000 90.000 3.861e+00 -2.130e+01 296.399 3.847e+00 103.792 3.839e+01
-44.000 90.000 -2.188e-01 -2.079e+01 266.367 -2.570e-01 65.276 2.947e+01
-43.000 90.000 -9.744e+00 -2.082e+01 249.089 -1.010e+01 352.707 1.101e+01
-42.000 90.000 -6.361e+00 -2.048e+01 239.033 -6.533e+00 214.933 2.202e+01
-41.000 90.000 -2.059e+00 -1.979e+01 226.433 -2.133e+00 153.379 1.806e+01
-40.000 90.000 -8.572e-02 -1.982e+01 207.876 -1.321e-01 96.552 2.032e+01
-39.000 90.000 1.042e+00 -2.141e+01 185.688 1.017e+00 45.726 2.629e+01
-38.000 90.000 2.049e-01 -2.521e+01 163.587 1.924e-01 3.258 3.488e+01
-37.000 90.000 -5.335e+00 -3.191e+01 151.417 -5.345e+00 327.596 4.000e+01
-36.000 90.000 -1.262e+01 -3.643e+01 167.970 -1.264e+01 98.299 2.436e+01
-35.000 90.000 2.913e-02 -3.318e+01 140.707 2.705e-02 70.764 3.375e+01
-34.000 90.000 3.383e+00 -2.849e+01 93.040 3.381e+00 35.060 3.331e+01
-33.000 90.000 3.538e+00 -2.534e+01 55.045 3.532e+00 354.582 3.008e+01
-32.000 90.000 1.522e+00 -2.472e+01 22.651 1.511e+00 303.607 2.639e+01
-31.000 90.000 -6.343e-01 -2.664e+01 351.703 -6.452e-01 232.477 2.718e+01
-30.000 90.000 2.827e-01 -3.086e+01 321.003 2.793e-01 157.672 4.000e+01
-29.000 90.000 1.607e+00 -3.541e+01 301.135 1.606e+00 97.104 4.000e+01
-28.000 90.000 1.920e+00 -3.410e+01 301.898 1.919e+00 38.880 3.608e+01
-27.000 90.000 2.421e+00 -3.010e+01 288.882 2.419e+00 337.279 3.505e+01
-26.000 90.000 3.839e+00 -2.917e+01 268.273 3.837e+00 280.610 4.000e+01
-25.000 90.000 4.949e+00 -3.369e+01 242.809 4.948e+00 233.925 4.000e+01
-24.000 90.000 4.758e+00 -4.122e+01 91.084 4.758e+00 192.379 4.000e+01
-23.000 90.000 3.066e+00 -2.983e+01 52.827 3.064e+00 147.416 3.293e+01
-22.000 90.000 1.402e+00 -2.767e+01 45.149 1.397e+00 87.368 3.253e+01
-21.000 90.000 3.160e+00 -2.761e+01 54.649 3.156e+00 26.228 3.722e+01
-20.000 90.000 5.749e+00 -2.586e+01 65.155 5.746e+00 345.456 3.175e+01
-19.000 90.000 7.068e+00 -2.403e+01 55.985 7.065e+00 315.126 3.125e+01
-18.000 90.000 7.078e+00 -2.361e+01 33.592 7.075e+00 286.803 3.106e+01
-17.000 90.000 6.142e+00 -2.483e+01 6.992 6.138e+00 255.141 3.162e+01
-16.000 90.000 5.118e+00 -2.923e+01 341.483 5.116e+00 216.883 3.603e+01
-15.000 90.000 5.112e+00 -4.941e+01 251.931 5.112e+00 176.084 4.000e+01
-14.000 90.000 5.925e+00 -3.059e+01 144.320 5.924e+00 140.974 4.000e+01
-13.000 90.000 6.730e+00 -2.746e+01 140.101 6.729e+00 112.366 4.000e+01
-12.000 90.000 7.351e+00 -2.760e+01 149.958 7.350e+00 87.611 3.600e+01
-11.000 90.000 7.957e+00 -2.782e+01 159.165 7.956e+00 65.576 3.579e+01
-10.000 90.000 8.612e+00 -2.845e+01 140.940 8.611e+00 46.733 3.709e+01
-9.000 90.000 9.196e+00 -2.697e+01 97.083 9.195e+00 31.717 3.700e+01
-8.000 90.000 9.615e+00 -2.445e+01 72.560 9.614e+00 20.562 3.613e+01
-7.000 90.000 9.999e+00 -2.560e+01 73.776 9.997e+00 12.708 3.676e+01
-6.000 90.000 1.068e+01 -2.762e+01 127.302 1.068e+01 6.780 3.960e+01
-5.000 90.000 1.190e+01 -2.166e+01 162.677 1.190e+01 0.872 4.000e+01
-4.000 90.000 1.350e+01 -1.899e+01 161.889 1.350e+01 354.109 4.000e+01
-3.000 90.000 1.507e+01 -1.975e+01 146.716 1.507e+01 347.174 4.000e+01
-2.000 90.000 1.617e+01 -2.200e+01 111.956 1.617e+01 341.089 4.000e+01
-1.000 90.000 1.655e+01 -2.175e+01 71.795 1.655e+01 336.434 3.834e+01
0.000 90.000 1.609e+01 -2.113e+01 55.003 1.609e+01 333.411 3.732e+01
1.000 90.000 1.486e+01 -2.215e+01 57.606 1.486e+01 332.143 3.704e+01
2.000 90.000 1.315e+01 -2.337e+01 72.804 1.315e+01 332.784 3.665e+01
3.000 90.000 1.152e+01 -2.366e+01 86.453 1.151e+01 335.569 3.577e+01
4.000 90.000 1.057e+01 -2.455e+01 92.048 1.056e+01 340.387 3.575e+01
5.000 90.000 1.038e+01 -2.797e+01 98.556 1.038e+01 346.633 3.900e+01
6.000 90.000 1.046e+01 -3.643e+01 147.380 1.046e+01 353.958 4.000e+01
7.000 90.000 1.033e+01 -3.031e+01 233.365 1.033e+01 2.602 4.000e+01
8.000 90.000 9.847e+00 -2.642e+01 252.080 9.846e+00 13.055 3.761e+01
9.000 90.000 9.196e+00 -2.631e+01 268.867 9.195e+00 25.793 3.650e+01
10.000 90.000 8.616e+00 -2.776e+01 291.933 8.615e+00 41.129 3.688e+01
11.000 90.000 8.134e+00 -2.917e+01 314.788 8.134e+00 59.385 3.759e+01
12.000 90.000 7.517e+00 -3.143e+01 326.222 7.517e+00 81.597 3.983e+01
13.000 90.000 6.613e+00 -3.876e+01 321.888 6.613e+00 110.017 4.000e+01
14.000 90.000 5.851e+00 -3.744e+01 174.175 5.851e+00 146.440 4.000e+01
15.000 90.000 6.007e+00 -2.770e+01 171.842 6.005e+00 186.483 4.000e+01
16.000 90.000 6.729e+00 -2.409e+01 183.268 6.726e+00 222.170 3.486e+01
17.000 90.000 7.069e+00 -2.315e+01 205.170 7.065e+00 252.686 3.287e+01
18.000 90.000 6.680e+00 -2.318e+01 239.705 6.675e+00 281.606 3.336e+01
19.000 90.000 5.701e+00 -2.238e+01 278.763 5.695e+00 312.673 3.315e+01
20.000 90.000 4.517e+00 -2.139e+01 309.507 4.505e+00 348.724 2.989e+01
21.000 90.000 3.549e+00 -2.151e+01 332.417 3.536e+00 30.728 2.645e+01
22.000 90.000 3.051e+00 -2.294e+01 351.481 3.040e+00 77.766 2.600e+01
23.000 90.000 3.087e+00 -2.546e+01 8.454 3.081e+00 127.563 2.972e+01
24.000 90.000 3.339e+00 -2.887e+01 20.593 3.336e+00 176.862 4.000e+01
25.000 90.000 3.003e+00 -3.279e+01 13.387 3.002e+00 225.531 4.000e+01
26.000 90.000 1.575e+00 -3.196e+01 341.378 1.573e+00 280.298 3.469e+01
27.000 90.000 6.829e-01 -2.798e+01 336.480 6.770e-01 350.326 4.000e+01
28.000 90.000 2.501e+00 -2.639e+01 348.562 2.495e+00 57.218 2.950e+01
29.000 90.000 3.869e+00 -2.821e+01 6.654 3.866e+00 108.339 3.226e+01
30.000 90.000 2.960e+00 -3.755e+01 27.635 2.959e+00 156.860 4.000e+01
31.000 90.000 2.411e-01 -3.510e+01 234.237 2.399e-01 221.976 4.000e+01
32.000 90.000 1.199e+00 -2.832e+01 262.990 1.194e+00 303.581 3.325e+01
33.000 90.000 3.818e+00 -2.786e+01 300.426 3.815e+00 357.163 3.323e+01
34.000 90.000 3.545e+00 -3.024e+01 358.249 3.544e+00 34.072 3.844e+01
35.000 90.000 -1.606e+00 -3.032e+01 77.578 -1.612e+00 60.269 3.925e+01
36.000 90.000 -8.658e+00 -2.881e+01 140.793 -8.700e+00 323.990 4.000e+01
37.000 90.000 2.811e+00 -2.947e+01 201.850 2.809e+00 328.997 3.425e+01
38.000 90.000 6.105e+00 -2.971e+01 278.256 6.104e+00 0.491 3.589e+01
39.000 90.000 6.441e+00 -2.758e+01 344.408 6.439e+00 39.073 3.579e+01
40.000 90.000 5.266e+00 -2.713e+01 34.572 5.263e+00 87.040 3.441e+01
41.000 90.000 4.206e+00 -3.009e+01 86.896 4.204e+00 143.877 3.582e+01
42.000 90.000 3.831e+00 -3.458e+01 179.775 3.830e+00 198.873 4.000e+01
43.000 90.000 2.754e+00 -3.035e+01 267.180 2.752e+00 248.465 4.000e+01
44.000 90.000 3.756e-01 -2.850e+01 316.904 3.700e-01 301.198 4.000e+01
45.000 90.000 -1.536e+00 -3.063e+01 3.909 -1.542e+00 3.857 4.000e+01
46.000 90.000 -1.523e+00 -3.742e+01 77.642 -1.524e+00 58.030 4.000e+01
47.000 90.000 -2.273e+00 -3.510e+01 202.751 -2.275e+00 92.818 3.337e+01
48.000 90.000 -5.288e+00 -3.027e+01 263.703 -5.302e+00 113.180 3.115e+01
49.000 90.000 -1.126e+01 -2.890e+01 311.628 -1.133e+01 119.568 3.131e+01
50.000 90.000 -2.481e+01 -3.025e+01 356.641 -2.627e+01 85.490 3.981e+00
51.000 90.000 -1.444e+01 -3.612e+01 45.765 -1.447e+01 320.808 2.169e+01
52.000 90.000 -8.004e+00 -4.183e+01 211.286 -8.006e+00 325.904 3.466e+01
53.000 90.000 -5.858e+00 -3.144e+01 275.367 -5.870e+00 342.257 2.630e+01
54.000 90.000 -6.717e+00 -2.834e+01 319.280 -6.747e+00 7.481 2.417e+01
55.000 90.000 -1.004e+01 -2.779e+01 4.402 -1.011e+01 49.599 2.074e+01
56.000 90.000 -1.165e+01 -2.858e+01 52.085 -1.174e+01 116.281 1.779e+01
57.000 90.000 -1.033e+01 -3.047e+01 101.020 -1.037e+01 161.954 2.129e+01
58.000 90.000 -1.136e+01 -3.398e+01 153.613 -1.139e+01 181.369 2.927e+01
59.000 90.000 -1.492e+01 -3.882e+01 220.279 -1.494e+01 173.793 2.669e+01
60.000 90.000 -1.572e+01 -4.291e+01 296.482 -1.573e+01 142.312 3.441e+01
61.000 90.000 -1.554e+01 -5.315e+01 40.676 -1.554e+01 132.754 3.761e+01
62.000 90.000 -2.091e+01 -4.172e+01 180.158 -2.094e+01 124.394 2.246e+01
63.000 90.000 -2.190e+01 -3.698e+01 227.851 -2.204e+01 25.183 2.346e+01
64.000 90.000 -1.515e+01 -3.673e+01 283.055 -1.518e+01 17.346 2.158e+01
65.000 90.000 -1.541e+01 -3.566e+01 357.140 -1.545e+01 27.802 2.612e+01
66.000 90.000 -2.500e+01 -3.247e+01 56.476 -2.585e+01 34.360 1.663e+01
67.000 90.000 -1.857e+01 -3.117e+01 103.754 -1.881e+01 244.337 1.661e+01
68.000 90.000 -1.293e+01 -3.159e+01 157.034 -1.299e+01 256.893 1.874e+01
69.000 90.000 -1.357e+01 -3.108e+01 219.136 -1.365e+01 271.597 1.951e+01
70.000 90.000 -2.239e+01 -2.947e+01 271.634 -2.333e+01 289.895 1.797e+01
71.000 90.000 -1.809e+01 -2.908e+01 315.520 -1.845e+01 114.557 2.019e+01
72.000 90.000 -1.203e+01 -3.014e+01 2.300 -1.210e+01 129.932 2.012e+01
73.000 90.000 -1.213e+01 -3.108e+01 57.622 -1.218e+01 143.555 1.892e+01
74.000 90.000 -1.864e+01 -3.079e+01 110.246 -1.891e+01 158.539 1.467e+01
75.000 90.000 -2.164e+01 -3.089e+01 153.754 -2.219e+01 337.162 3.431e+01
76.000 90.000 -1.307e+01 -3.236e+01 195.777 -1.312e+01 351.731 2.712e+01
77.000 90.000 -1.227e+01 -3.455e+01 245.108 -1.229e+01 359.362 2.306e+01
78.000 90.000 -1.705e+01 -3.553e+01 299.714 -1.711e+01 356.927 1.997e+01
79.000 90.000 -2.281e+01 -3.549e+01 344.698 -2.305e+01 256.116 1.245e+01
80.000 90.000 -1.417e+01 -3.625e+01 19.311 -1.420e+01 226.907 2.878e+01
81.000 90.000 -1.291e+01 -3.845e+01 51.152 -1.292e+01 224.346 4.000e+01
82.000 90.000 -1.717e+01 -4.150e+01 91.225 -1.719e+01 212.917 2.572e+01
83.000 90.000 -2.086e+01 -4.201e+01 142.995 -2.089e+01 120.495 2.952e+01
84.000 90.000 -1.314e+01 -3.955e+01 179.750 -1.315e+01 87.919 2.640e+01
85.000 90.000 -1.136e+01 -3.772e+01 203.915 -1.137e+01 82.533 2.773e+01
86.000 90.000 -1.423e+01 -3.753e+01 229.674 -1.425e+01 75.171 3.064e+01
87.000 90.000 -2.325e+01 -3.857e+01 270.413 -2.338e+01 10.746 1.533e+01
88.000 90.000 -1.423e+01 -3.739e+01 327.724 -1.425e+01 295.642 2.867e+01
89.000 90.000 -1.044e+01 -3.415e+01 11.668 -1.046e+01 286.205 2.372e+01
90.000 90.000 -1.097e+01 -3.227e+01 45.186 -1.100e+01 279.954 2.305e+01
91.000 90.000 -1.627e+01 -3.204e+01 81.651 -1.639e+01 262.377 4.000e+01
92.000 90.000 -1.930e+01 -3.201e+01 129.140 -1.954e+01 158.535 1.902e+01
93.000 90.000 -1.170e+01 -3.032e+01 178.538 -1.176e+01 125.010 2.049e+01
94.000 90.000 -9.499e+00 -2.830e+01 218.082 -9.557e+00 115.029 1.897e+01
95.000 90.000 -1.077e+01 -2.732e+01 253.295 -1.086e+01 104.693 2.226e+01
96.000 90.000 -1.605e+01 -2.719e+01 291.669 -1.639e+01 78.448 1.653e+01
97.000 90.000 -1.728e+01 -2.685e+01 335.231 -1.779e+01 343.303 2.712e+01
98.000 90.000 -1.118e+01 -2.573e+01 17.297 -1.133e+01 307.640 1.499e+01
99.000 90.000 -8.954e+00 -2.464e+01 53.546 -9.073e+00 293.112 1.692e+01
100.000 90.000 -9.487e+00 -2.424e+01 87.049 -9.635e+00 279.551 2.818e+01
101.000 90.000 -1.283e+01 -2.444e+01 122.018 -1.314e+01 258.095 1.481e+01
102.000 90.000 -1.752e+01 -2.463e+01 159.851 -1.846e+01 192.687 1.293e+01
103.000 90.000 -1.273e+01 -2.438e+01 197.127 -1.303e+01 124.723 1.182e+01
104.000 90.000 -8.941e+00 -2.404e+01 230.131 -9.077e+00 102.080 1.715e+01
105.000 90.000 -7.864e+00 -2.419e+01 259.469 -7.966e+00 87.268 3.377e+01
106.000 90.000 -9.131e+00 -2.504e+01 288.054 -9.244e+00 71.491 2.044e+01
107.000 90.000 -1.305e+01 -2.643e+01 318.693 -1.326e+01 43.973 1.321e+01
108.000 90.000 -1.624e+01 -2.788e+01 351.672 -1.655e+01 333.282 2.192e+01
109.000 90.000 -1.193e+01 -2.914e+01 22.371 -1.201e+01 278.081 1.742e+01
110.000 90.000 -9.053e+00 -3.082e+01 44.336 -9.082e+00 250.990 2.875e+01
111.000 90.000 -7.865e+00 -3.356e+01 50.248 -7.877e+00 227.809 4.000e+01
112.000 90.000 -7.607e+00 -3.514e+01 31.592 -7.615e+00 205.102 4.000e+01
113.000 90.000 -8.373e+00 -3.278e+01 20.402 -8.389e+00 183.379 3.509e+01
114.000 90.000 -1.104e+01 -3.074e+01 32.772 -1.109e+01 158.662 2.151e+01
115.000 90.000 -1.589e+01 -2.998e+01 58.178 -1.607e+01 105.881 1.669e+01
116.000 90.000 -1.275e+01 -2.978e+01 89.673 -1.284e+01 28.551 1.813e+01
117.000 90.000 -8.246e+00 -2.994e+01 118.717 -8.276e+00 357.350 2.305e+01
118.000 90.000 -6.152e+00 -3.122e+01 137.534 -6.166e+00 336.343 3.491e+01
119.000 90.000 -5.410e+00 -3.392e+01 135.656 -5.416e+00 315.610 4.000e+01
120.000 90.000 -5.486e+00 -3.398e+01 109.226 -5.492e+00 294.201 4.000e+01
121.000 90.000 -6.468e+00 -3.104e+01 101.925 -6.483e+00 271.857 3.974e+01
122.000 90.000 -8.622e+00 -2.973e+01 111.953 -8.656e+00 244.406 2.374e+01
123.000 90.000 -1.128e+01 -3.030e+01 127.329 -1.134e+01 203.110 1.924e+01
124.000 90.000 -1.207e+01 -3.209e+01 141.570 -1.211e+01 149.162 3.764e+01
125.000 90.000 -1.060e+01 -3.367e+01 148.465 -1.062e+01 97.899 2.531e+01
126.000 90.000 -7.712e+00 -3.335e+01 151.272 -7.724e+00 56.115 2.567e+01
127.000 90.000 -4.815e+00 -3.221e+01 160.537 -4.823e+00 27.120 3.017e+01
128.000 90.000 -2.989e+00 -3.237e+01 175.506 -2.994e+00 5.036 4.000e+01
129.000 90.000 -2.168e+00 -3.532e+01 192.768 -2.171e+00 343.143 3.928e+01
130.000 90.000 -1.715e+00 -4.515e+01 215.972 -1.715e+00 318.704 4.000e+01
131.000 90.000 -1.171e+00 -4.393e+01 22.538 -1.171e+00 293.731 4.000e+01
132.000 90.000 -7.157e-01 -3.677e+01 31.562 -7.168e-01 270.296 3.742e+01
133.000 90.000 -5.613e-01 -3.358e+01 29.513 -5.635e-01 247.368 3.726e+01
134.000 90.000 -5.890e-01 -3.109e+01 30.574 -5.929e-01 223.898 4.000e+01
135.000 90.000 -7.167e-01 -2.995e+01 39.710 -7.219e-01 200.425 3.886e+01
136.000 90.000 -1.052e+00 -3.119e+01 53.646 -1.056e+00 176.940 3.170e+01
137.000 90.000 -1.569e+00 -3.681e+01 65.356 -1.571e+00 152.373 3.525e+01
138.000 90.000 -2.093e+00 -4.612e+01 317.145 -2.093e+00 126.680 4.000e+01
139.000 90.000 -2.600e+00 -3.446e+01 302.352 -2.602e+00 100.603 4.000e+01
140.000 90.000 -3.108e+00 -3.194e+01 309.115 -3.113e+00 74.111 3.057e+01
141.000 90.000 -3.571e+00 -3.189e+01 305.197 -3.577e+00 47.879 2.852e+01
142.000 90.000 -4.229e+00 -3.097e+01 295.460 -4.238e+00 22.623 2.674e+01
143.000 90.000 -5.293e+00 -2.996e+01 301.370 -5.308e+00 355.727 2.646e+01
144.000 90.000 -6.205e+00 -3.155e+01 328.191 -6.218e+00 324.985 4.000e+01
145.000 90.000 -6.591e+00 -3.464e+01 37.093 -6.598e+00 295.537 2.822e+01
146.000 90.000 -7.378e+00 -3.047e+01 109.022 -7.399e+00 269.301 3.254e+01
147.000 90.000 -8.780e+00 -2.806e+01 144.900 -8.831e+00 239.122 1.925e+01
148.000 90.000 -9.527e+00 -3.011e+01 172.634 -9.565e+00 205.009 2.603e+01
149.000 90.000 -1.013e+01 -4.192e+01 214.275 -1.014e+01 177.194 3.618e+01
150.000 90.000 -1.223e+01 -3.484e+01 18.955 -1.226e+01 148.626 2.488e+01
151.000 90.000 -1.399e+01 -3.072e+01 42.416 -1.408e+01 104.688 1.774e+01
152.000 90.000 -1.347e+01 -3.350e+01 57.475 -1.352e+01 69.062 3.401e+01
153.000 90.000 -1.508e+01 -4.729e+01 19.524 -1.508e+01 47.561 3.877e+01
154.000 90.000 -1.985e+01 -3.723e+01 294.767 -1.993e+01 8.245 1.767e+01
155.000 90.000 -2.000e+01 -3.613e+01 299.297 -2.011e+01 311.438 2.977e+01
156.000 90.000 -2.235e+01 -4.125e+01 291.693 -2.241e+01 299.736 3.604e+01
157.000 90.000 -2.920e+01 -4.519e+01 262.382 -2.931e+01 63.485 2.587e+01
158.000 90.000 -1.763e+01 -4.285e+01 315.321 -1.764e+01 83.724 2.734e+01
159.000 90.000 -1.551e+01 -3.531e+01 357.474 -1.555e+01 64.821 2.046e+01
160.000 90.000 -1.378e+01 -3.285e+01 12.723 -1.383e+01 23.007 3.409e+01
161.000 90.000 -1.059e+01 -3.631e+01 6.828 -1.060e+01 352.115 3.764e+01
162.000 90.000 -9.509e+00 -3.703e+01 293.846 -9.516e+00 329.887 3.213e+01
163.000 90.000 -9.793e+00 -3.174e+01 281.293 -9.821e+00 297.793 3.291e+01
164.000 90.000 -8.498e+00 -3.296e+01 300.583 -8.513e+00 262.874 2.873e+01
165.000 90.000 -7.320e+00 -3.704e+01 18.009 -7.325e+00 243.806 3.261e+01
166.000 90.000 -8.274e+00 -3.117e+01 77.317 -8.296e+00 232.829 3.056e+01
167.000 90.000 -1.087e+01 -3.006e+01 93.937 -1.092e+01 220.488 2.108e+01
168.000 90.000 -1.236e+01 -3.432e+01 94.806 -1.239e+01 209.359 2.276e+01
169.000 90.000 -1.096e+01 -4.175e+01 50.285 -1.097e+01 213.396 4.000e+01
170.000 90.000 -8.730e+00 -4.202e+01 32.618 -8.732e+00 220.927 4.000e+01
171.000 90.000 -7.991e+00 -3.976e+01 104.023 -7.994e+00 219.350 3.264e+01
172.000 90.000 -8.859e+00 -3.467e+01 136.122 -8.870e+00 202.772 2.654e+01
173.000 90.000 -8.987e+00 -3.625e+01 148.785 -8.995e+00 175.162 3.432e+01
174.000 90.000 -8.365e+00 -5.441e+01 176.407 -8.365e+00 160.780 4.000e+01
175.000 90.000 -9.202e+00 -4.233e+01 325.843 -9.204e+00 165.729 4.000e+01
176.000 90.000 -1.067e+01 -4.676e+01 252.893 -1.067e+01 185.307 3.677e+01
177.000 90.000 -1.094e+01 -3.344e+01 191.089 -1.097e+01 198.635 4.000e+01
178.000 90.000 -1.047e+01 -2.932e+01 190.538 -1.053e+01 189.194 4.000e+01
179.000 90.000 -9.022e+00 -3.147e+01 201.581 -9.047e+00 173.208 2.892e+01
