# Supplementary material
Source: publisher figshare collection journal article supplement (https://frontiersin.figshare.com/ndownloader/files/24979811)
Supplement: Supplementary file 1 [file 24979811 › datasheet/azimuth plane/10.csv]

Theta [deg.] Phi [deg.] Abs(Gain)[dB ] Abs(??? )[dB ] Phase(??? )[deg.] Abs(??? )[dB ] Phase(??? )[deg.] Ax.Ratio[dB ]
------------------------------------------------------------------------------------------------------------------------------------------------------
-180.000 0.000 -7.167e+00 -7.167e+00 0.000 -7.167e+00 0.000 -4.228e+01
-179.000 0.000 -1.026e+01 -1.026e+01 0.000 -1.026e+01 0.000 -4.847e+01
-178.000 0.000 -2.335e+01 -2.335e+01 0.000 -2.335e+01 0.000 -7.464e+01
-177.000 0.000 -2.064e+01 -2.064e+01 0.000 -2.064e+01 0.000 -6.922e+01
-176.000 0.000 -2.126e+01 -2.126e+01 0.000 -2.126e+01 0.000 -7.046e+01
-175.000 0.000 -8.986e+00 -8.986e+00 0.000 -8.986e+00 0.000 -4.592e+01
-174.000 0.000 -6.740e+00 -6.740e+00 0.000 -6.740e+00 0.000 -4.143e+01
-173.000 0.000 -1.093e+01 -1.093e+01 0.000 -1.093e+01 0.000 -4.981e+01
-172.000 0.000 -1.881e+01 -1.881e+01 0.000 -1.881e+01 0.000 -6.557e+01
-171.000 0.000 -1.384e+01 -1.384e+01 0.000 -1.384e+01 0.000 -5.563e+01
-170.000 0.000 -1.738e+01 -1.738e+01 0.000 -1.738e+01 0.000 -6.270e+01
-169.000 0.000 -1.089e+01 -1.089e+01 0.000 -1.089e+01 0.000 -4.972e+01
-168.000 0.000 -9.021e+00 -9.021e+00 0.000 -9.021e+00 0.000 -4.599e+01
-167.000 0.000 -1.214e+01 -1.214e+01 0.000 -1.214e+01 0.000 -5.224e+01
-166.000 0.000 -8.134e+00 -8.134e+00 0.000 -8.134e+00 0.000 -4.421e+01
-165.000 0.000 -6.053e+00 -6.053e+00 0.000 -6.053e+00 0.000 -4.005e+01
-164.000 0.000 -9.941e+00 -9.941e+00 0.000 -9.941e+00 0.000 -4.783e+01
-163.000 0.000 -1.569e+01 -1.569e+01 0.000 -1.569e+01 0.000 -5.933e+01
-162.000 0.000 -1.096e+01 -1.096e+01 0.000 -1.096e+01 0.000 -4.986e+01
-161.000 0.000 -1.581e+01 -1.581e+01 0.000 -1.581e+01 0.000 -5.957e+01
-160.000 0.000 -1.760e+01 -1.760e+01 0.000 -1.760e+01 0.000 -6.314e+01
-159.000 0.000 -1.117e+01 -1.117e+01 0.000 -1.117e+01 0.000 -5.029e+01
-158.000 0.000 -1.506e+01 -1.506e+01 0.000 -1.506e+01 0.000 -5.806e+01
-157.000 0.000 -1.147e+01 -1.147e+01 0.000 -1.147e+01 0.000 -5.089e+01
-156.000 0.000 -6.989e+00 -6.989e+00 0.000 -6.989e+00 0.000 -4.192e+01
-155.000 0.000 -8.276e+00 -8.276e+00 0.000 -8.276e+00 0.000 -4.450e+01
-154.000 0.000 -8.893e+00 -8.893e+00 0.000 -8.893e+00 0.000 -4.573e+01
-153.000 0.000 -5.305e+00 -5.305e+00 0.000 -5.305e+00 0.000 -3.856e+01
-152.000 0.000 -5.395e+00 -5.395e+00 0.000 -5.395e+00 0.000 -3.874e+01
-151.000 0.000 -7.485e+00 -7.485e+00 0.000 -7.485e+00 0.000 -4.292e+01
-150.000 0.000 -5.154e+00 -5.154e+00 0.000 -5.154e+00 0.000 -3.825e+01
-149.000 0.000 -4.137e+00 -4.137e+00 0.000 -4.137e+00 0.000 -3.622e+01
-148.000 0.000 -5.639e+00 -5.639e+00 0.000 -5.639e+00 0.000 -3.922e+01
-147.000 0.000 -3.928e+00 -3.928e+00 0.000 -3.928e+00 0.000 -3.580e+01
-146.000 0.000 -1.810e+00 -1.810e+00 0.000 -1.810e+00 0.000 -3.157e+01
-145.000 0.000 -2.392e+00 -2.392e+00 0.000 -2.392e+00 0.000 -3.273e+01
-144.000 0.000 -2.708e+00 -2.708e+00 0.000 -2.708e+00 0.000 -3.336e+01
-143.000 0.000 -6.039e-01 -6.039e-01 0.000 -6.039e-01 0.000 -2.915e+01
-142.000 0.000 1.327e-01 1.327e-01 0.000 1.327e-01 0.000 -2.768e+01
-141.000 0.000 -1.725e-01 -1.725e-01 0.000 -1.725e-01 0.000 -2.829e+01
-140.000 0.000 1.112e+00 1.112e+00 0.000 1.112e+00 0.000 -2.572e+01
-139.000 0.000 2.449e+00 2.449e+00 0.000 2.449e+00 0.000 -2.305e+01
-138.000 0.000 2.469e+00 2.469e+00 0.000 2.469e+00 0.000 -2.301e+01
-137.000 0.000 2.749e+00 2.749e+00 0.000 2.749e+00 0.000 -2.245e+01
-136.000 0.000 4.016e+00 4.016e+00 0.000 4.016e+00 0.000 -1.991e+01
-135.000 0.000 4.513e+00 4.513e+00 0.000 4.513e+00 0.000 -1.892e+01
-134.000 0.000 4.109e+00 4.109e+00 0.000 4.109e+00 0.000 -1.973e+01
-133.000 0.000 4.341e+00 4.341e+00 0.000 4.341e+00 0.000 -1.926e+01
-132.000 0.000 5.077e+00 5.077e+00 0.000 5.077e+00 0.000 -1.779e+01
-131.000 0.000 4.997e+00 4.997e+00 0.000 4.997e+00 0.000 -1.795e+01
-130.000 0.000 4.461e+00 4.461e+00 0.000 4.461e+00 0.000 -1.902e+01
-129.000 0.000 4.504e+00 4.504e+00 0.000 4.504e+00 0.000 -1.894e+01
-128.000 0.000 4.339e+00 4.339e+00 0.000 4.339e+00 0.000 -1.927e+01
-127.000 0.000 2.971e+00 2.971e+00 0.000 2.971e+00 0.000 -2.200e+01
-126.000 0.000 1.318e+00 1.318e+00 0.000 1.318e+00 0.000 -2.531e+01
-125.000 0.000 9.703e-01 9.703e-01 0.000 9.703e-01 0.000 -2.601e+01
-124.000 0.000 4.202e-01 4.202e-01 0.000 4.202e-01 0.000 -2.711e+01
-123.000 0.000 -7.615e-01 -7.615e-01 0.000 -7.615e-01 0.000 -2.947e+01
-122.000 0.000 -2.267e-01 -2.267e-01 0.000 -2.267e-01 0.000 -2.840e+01
-121.000 0.000 8.416e-01 8.416e-01 0.000 8.416e-01 0.000 -2.626e+01
-120.000 0.000 7.585e-01 7.585e-01 0.000 7.585e-01 0.000 -2.643e+01
-119.000 0.000 6.968e-01 6.968e-01 0.000 6.968e-01 0.000 -2.655e+01
-118.000 0.000 1.356e+00 1.356e+00 0.000 1.356e+00 0.000 -2.523e+01
-117.000 0.000 1.124e+00 1.124e+00 0.000 1.124e+00 0.000 -2.570e+01
-116.000 0.000 -6.280e-01 -6.280e-01 0.000 -6.280e-01 0.000 -2.920e+01
-115.000 0.000 -2.088e+00 -2.088e+00 0.000 -2.088e+00 0.000 -3.212e+01
-114.000 0.000 -1.947e+00 -1.947e+00 0.000 -1.947e+00 0.000 -3.184e+01
-113.000 0.000 -2.512e+00 -2.512e+00 0.000 -2.512e+00 0.000 -3.297e+01
-112.000 0.000 -2.865e+00 -2.865e+00 0.000 -2.865e+00 0.000 -3.368e+01
-111.000 0.000 -9.805e-01 -9.805e-01 0.000 -9.805e-01 0.000 -2.991e+01
-110.000 0.000 9.339e-02 9.339e-02 0.000 9.339e-02 0.000 -2.776e+01
-109.000 0.000 -1.205e+00 -1.205e+00 0.000 -1.205e+00 0.000 -3.036e+01
-108.000 0.000 -4.457e+00 -4.457e+00 0.000 -4.457e+00 0.000 -3.686e+01
-107.000 0.000 -5.163e+00 -5.163e+00 0.000 -5.163e+00 0.000 -3.827e+01
-106.000 0.000 -3.623e+00 -3.623e+00 0.000 -3.623e+00 0.000 -3.519e+01
-105.000 0.000 -3.469e+00 -3.469e+00 0.000 -3.469e+00 0.000 -3.488e+01
-104.000 0.000 -3.469e+00 -3.469e+00 0.000 -3.469e+00 0.000 -3.488e+01
-103.000 0.000 -2.964e+00 -2.964e+00 0.000 -2.964e+00 0.000 -3.387e+01
-102.000 0.000 -3.837e+00 -3.837e+00 0.000 -3.837e+00 0.000 -3.562e+01
-101.000 0.000 -7.454e+00 -7.454e+00 0.000 -7.454e+00 0.000 -4.285e+01
-100.000 0.000 -8.643e+00 -8.643e+00 0.000 -8.643e+00 0.000 -4.523e+01
-99.000 0.000 -4.417e+00 -4.417e+00 0.000 -4.417e+00 0.000 -3.678e+01
-98.000 0.000 -3.029e+00 -3.029e+00 0.000 -3.029e+00 0.000 -3.400e+01
-97.000 0.000 -4.885e+00 -4.885e+00 0.000 -4.885e+00 0.000 -3.772e+01
-96.000 0.000 -1.051e+01 -1.051e+01 0.000 -1.051e+01 0.000 -4.896e+01
-95.000 0.000 -1.016e+01 -1.016e+01 0.000 -1.016e+01 0.000 -4.827e+01
-94.000 0.000 -5.577e+00 -5.577e+00 0.000 -5.577e+00 0.000 -3.910e+01
-93.000 0.000 -4.621e+00 -4.621e+00 0.000 -4.621e+00 0.000 -3.719e+01
-92.000 0.000 -6.659e+00 -6.659e+00 0.000 -6.659e+00 0.000 -4.126e+01
-91.000 0.000 -1.117e+01 -1.117e+01 0.000 -1.117e+01 0.000 -5.029e+01
-90.000 0.000 -1.005e+01 -1.005e+01 0.000 -1.005e+01 0.000 -4.804e+01
-89.000 0.000 -6.471e+00 -6.471e+00 0.000 -6.471e+00 0.000 -4.089e+01
-88.000 0.000 -5.638e+00 -5.638e+00 0.000 -5.638e+00 0.000 -3.922e+01
-87.000 0.000 -7.352e+00 -7.352e+00 0.000 -7.352e+00 0.000 -4.265e+01
-86.000 0.000 -1.047e+01 -1.047e+01 0.000 -1.047e+01 0.000 -4.889e+01
-85.000 0.000 -9.183e+00 -9.183e+00 0.000 -9.183e+00 0.000 -4.631e+01
-84.000 0.000 -6.525e+00 -6.525e+00 0.000 -6.525e+00 0.000 -4.100e+01
-83.000 0.000 -6.151e+00 -6.151e+00 0.000 -6.151e+00 0.000 -4.025e+01
-82.000 0.000 -7.918e+00 -7.918e+00 0.000 -7.918e+00 0.000 -4.378e+01
-81.000 0.000 -9.540e+00 -9.540e+00 0.000 -9.540e+00 0.000 -4.703e+01
-80.000 0.000 -8.242e+00 -8.242e+00 0.000 -8.242e+00 0.000 -4.443e+01
-79.000 0.000 -7.457e+00 -7.457e+00 0.000 -7.457e+00 0.000 -4.286e+01
-78.000 0.000 -8.418e+00 -8.418e+00 0.000 -8.418e+00 0.000 -4.478e+01
-77.000 0.000 -8.884e+00 -8.884e+00 0.000 -8.884e+00 0.000 -4.571e+01
-76.000 0.000 -7.579e+00 -7.579e+00 0.000 -7.579e+00 0.000 -4.310e+01
-75.000 0.000 -7.620e+00 -7.620e+00 0.000 -7.620e+00 0.000 -4.319e+01
-74.000 0.000 -1.084e+01 -1.084e+01 0.000 -1.084e+01 0.000 -4.963e+01
-73.000 0.000 -1.417e+01 -1.417e+01 0.000 -1.417e+01 0.000 -5.628e+01
-72.000 0.000 -9.136e+00 -9.136e+00 0.000 -9.136e+00 0.000 -4.622e+01
-71.000 0.000 -6.872e+00 -6.872e+00 0.000 -6.872e+00 0.000 -4.169e+01
-70.000 0.000 -7.888e+00 -7.888e+00 0.000 -7.888e+00 0.000 -4.372e+01
-69.000 0.000 -1.193e+01 -1.193e+01 0.000 -1.193e+01 0.000 -5.181e+01
-68.000 0.000 -1.456e+01 -1.456e+01 0.000 -1.456e+01 0.000 -5.707e+01
-67.000 0.000 -1.198e+01 -1.198e+01 0.000 -1.198e+01 0.000 -5.190e+01
-66.000 0.000 -1.124e+01 -1.124e+01 0.000 -1.124e+01 0.000 -5.043e+01
-65.000 0.000 -1.100e+01 -1.100e+01 0.000 -1.100e+01 0.000 -4.994e+01
-64.000 0.000 -9.788e+00 -9.788e+00 0.000 -9.788e+00 0.000 -4.752e+01
-63.000 0.000 -1.000e+01 -1.000e+01 0.000 -1.000e+01 0.000 -4.795e+01
-62.000 0.000 -1.226e+01 -1.226e+01 0.000 -1.226e+01 0.000 -5.247e+01
-61.000 0.000 -9.887e+00 -9.887e+00 0.000 -9.887e+00 0.000 -4.772e+01
-60.000 0.000 -6.641e+00 -6.641e+00 0.000 -6.641e+00 0.000 -4.123e+01
-59.000 0.000 -7.190e+00 -7.190e+00 0.000 -7.190e+00 0.000 -4.233e+01
-58.000 0.000 -1.328e+01 -1.328e+01 0.000 -1.328e+01 0.000 -5.450e+01
-57.000 0.000 -1.104e+01 -1.104e+01 0.000 -1.104e+01 0.000 -5.002e+01
-56.000 0.000 -6.242e+00 -6.242e+00 0.000 -6.242e+00 0.000 -4.043e+01
-55.000 0.000 -7.591e+00 -7.591e+00 0.000 -7.591e+00 0.000 -4.313e+01
-54.000 0.000 -2.045e+01 -2.045e+01 0.000 -2.045e+01 0.000 -6.884e+01
-53.000 0.000 -8.928e+00 -8.928e+00 0.000 -8.928e+00 0.000 -4.580e+01
-52.000 0.000 -5.043e+00 -5.043e+00 0.000 -5.043e+00 0.000 -3.803e+01
-51.000 0.000 -7.736e+00 -7.736e+00 0.000 -7.736e+00 0.000 -4.342e+01
-50.000 0.000 -2.090e+01 -2.090e+01 0.000 -2.090e+01 0.000 -6.975e+01
-49.000 0.000 -6.830e+00 -6.830e+00 0.000 -6.830e+00 0.000 -4.161e+01
-48.000 0.000 -4.185e+00 -4.185e+00 0.000 -4.185e+00 0.000 -3.632e+01
-47.000 0.000 -7.292e+00 -7.292e+00 0.000 -7.292e+00 0.000 -4.253e+01
-46.000 0.000 -2.233e+01 -2.233e+01 0.000 -2.233e+01 0.000 -7.261e+01
-45.000 0.000 -9.029e+00 -9.029e+00 0.000 -9.029e+00 0.000 -4.600e+01
-44.000 0.000 -6.303e+00 -6.303e+00 0.000 -6.303e+00 0.000 -4.055e+01
-43.000 0.000 -7.701e+00 -7.701e+00 0.000 -7.701e+00 0.000 -4.335e+01
-42.000 0.000 -6.226e+00 -6.226e+00 0.000 -6.226e+00 0.000 -4.040e+01
-41.000 0.000 -2.434e+00 -2.434e+00 0.000 -2.434e+00 0.000 -3.281e+01
-40.000 0.000 -9.778e-01 -9.778e-01 0.000 -9.778e-01 0.000 -2.990e+01
-39.000 0.000 -2.393e+00 -2.393e+00 0.000 -2.393e+00 0.000 -3.273e+01
-38.000 0.000 -8.325e+00 -8.325e+00 0.000 -8.325e+00 0.000 -4.459e+01
-37.000 0.000 -1.154e+01 -1.154e+01 0.000 -1.154e+01 0.000 -5.102e+01
-36.000 0.000 -3.311e+00 -3.311e+00 0.000 -3.311e+00 0.000 -3.457e+01
-35.000 0.000 6.866e-01 6.866e-01 0.000 6.866e-01 0.000 -2.657e+01
-34.000 0.000 3.969e+00 3.969e+00 0.000 3.969e+00 0.000 -2.001e+01
-33.000 0.000 6.478e+00 6.478e+00 0.000 6.478e+00 0.000 -1.499e+01
-32.000 0.000 7.371e+00 7.371e+00 0.000 7.371e+00 0.000 -1.320e+01
-31.000 0.000 6.178e+00 6.178e+00 0.000 6.178e+00 0.000 -1.559e+01
-30.000 0.000 2.809e+00 2.809e+00 0.000 2.809e+00 0.000 -2.233e+01
-29.000 0.000 2.296e-01 2.296e-01 0.000 2.296e-01 0.000 -2.749e+01
-28.000 0.000 1.018e+00 1.018e+00 0.000 1.018e+00 0.000 -2.591e+01
-27.000 0.000 -3.129e-02 -3.129e-02 0.000 -3.129e-02 0.000 -2.801e+01
-26.000 0.000 -1.714e+00 -1.714e+00 0.000 -1.714e+00 0.000 -3.137e+01
-25.000 0.000 1.308e+00 1.308e+00 0.000 1.308e+00 0.000 -2.533e+01
-24.000 0.000 3.748e+00 3.748e+00 0.000 3.748e+00 0.000 -2.045e+01
-23.000 0.000 4.676e+00 4.676e+00 0.000 4.676e+00 0.000 -1.859e+01
-22.000 0.000 5.253e+00 5.253e+00 0.000 5.253e+00 0.000 -1.744e+01
-21.000 0.000 5.391e+00 5.391e+00 0.000 5.391e+00 0.000 -1.716e+01
-20.000 0.000 4.222e+00 4.222e+00 0.000 4.222e+00 0.000 -1.950e+01
-19.000 0.000 1.915e+00 1.915e+00 0.000 1.915e+00 0.000 -2.412e+01
-18.000 0.000 1.675e+00 1.675e+00 0.000 1.675e+00 0.000 -2.460e+01
-17.000 0.000 3.878e+00 3.878e+00 0.000 3.878e+00 0.000 -2.019e+01
-16.000 0.000 5.362e+00 5.362e+00 0.000 5.362e+00 0.000 -1.722e+01
-15.000 0.000 5.826e+00 5.826e+00 0.000 5.826e+00 0.000 -1.629e+01
-14.000 0.000 6.131e+00 6.131e+00 0.000 6.131e+00 0.000 -1.568e+01
-13.000 0.000 6.947e+00 6.947e+00 0.000 6.947e+00 0.000 -1.405e+01
-12.000 0.000 7.734e+00 7.734e+00 0.000 7.734e+00 0.000 -1.248e+01
-11.000 0.000 7.914e+00 7.914e+00 0.000 7.914e+00 0.000 -1.212e+01
-10.000 0.000 7.711e+00 7.711e+00 0.000 7.711e+00 0.000 -1.252e+01
-9.000 0.000 7.781e+00 7.781e+00 0.000 7.781e+00 0.000 -1.238e+01
-8.000 0.000 8.378e+00 8.378e+00 0.000 8.378e+00 0.000 -1.119e+01
-7.000 0.000 9.034e+00 9.034e+00 0.000 9.034e+00 0.000 -9.878e+00
-6.000 0.000 9.197e+00 9.197e+00 0.000 9.197e+00 0.000 -9.551e+00
-5.000 0.000 8.727e+00 8.727e+00 0.000 8.727e+00 0.000 -1.049e+01
-4.000 0.000 7.931e+00 7.931e+00 0.000 7.931e+00 0.000 -1.208e+01
-3.000 0.000 7.254e+00 7.254e+00 0.000 7.254e+00 0.000 -1.344e+01
-2.000 0.000 6.900e+00 6.900e+00 0.000 6.900e+00 0.000 -1.415e+01
-1.000 0.000 6.807e+00 6.807e+00 0.000 6.807e+00 0.000 -1.433e+01
0.000 0.000 6.781e+00 6.781e+00 0.000 6.781e+00 0.000 -1.438e+01
1.000 0.000 6.810e+00 6.810e+00 0.000 6.810e+00 0.000 -1.433e+01
2.000 0.000 7.060e+00 7.060e+00 0.000 7.060e+00 0.000 -1.383e+01
3.000 0.000 7.678e+00 7.678e+00 0.000 7.678e+00 0.000 -1.259e+01
4.000 0.000 8.780e+00 8.780e+00 0.000 8.780e+00 0.000 -1.039e+01
5.000 0.000 1.013e+01 1.013e+01 0.000 1.013e+01 0.000 -7.694e+00
6.000 0.000 1.138e+01 1.138e+01 0.000 1.138e+01 0.000 -5.190e+00
7.000 0.000 1.253e+01 1.253e+01 0.000 1.253e+01 0.000 -2.879e+00
8.000 0.000 1.362e+01 1.362e+01 0.000 1.362e+01 0.000 -6.992e-01
9.000 0.000 1.450e+01 1.450e+01 0.000 1.450e+01 0.000 1.063e+00
10.000 0.000 1.497e+01 1.497e+01 0.000 1.497e+01 0.000 1.999e+00
11.000 0.000 1.475e+01 1.475e+01 0.000 1.475e+01 0.000 1.559e+00
12.000 0.000 1.351e+01 1.351e+01 0.000 1.351e+01 0.000 -9.280e-01
13.000 0.000 1.106e+01 1.106e+01 0.000 1.106e+01 0.000 -5.828e+00
14.000 0.000 7.985e+00 7.985e+00 0.000 7.985e+00 0.000 -1.198e+01
15.000 0.000 6.013e+00 6.013e+00 0.000 6.013e+00 0.000 -1.592e+01
16.000 0.000 4.952e+00 4.952e+00 0.000 4.952e+00 0.000 -1.804e+01
17.000 0.000 3.199e+00 3.199e+00 0.000 3.199e+00 0.000 -2.155e+01
18.000 0.000 7.065e-01 7.065e-01 0.000 7.065e-01 0.000 -2.653e+01
19.000 0.000 4.664e-02 4.664e-02 0.000 4.664e-02 0.000 -2.785e+01
20.000 0.000 2.430e+00 2.430e+00 0.000 2.430e+00 0.000 -2.309e+01
21.000 0.000 4.125e+00 4.125e+00 0.000 4.125e+00 0.000 -1.970e+01
22.000 0.000 4.270e+00 4.270e+00 0.000 4.270e+00 0.000 -1.941e+01
23.000 0.000 4.015e+00 4.015e+00 0.000 4.015e+00 0.000 -1.992e+01
24.000 0.000 4.674e+00 4.674e+00 0.000 4.674e+00 0.000 -1.860e+01
25.000 0.000 5.590e+00 5.590e+00 0.000 5.590e+00 0.000 -1.677e+01
26.000 0.000 5.869e+00 5.869e+00 0.000 5.869e+00 0.000 -1.621e+01
27.000 0.000 5.067e+00 5.067e+00 0.000 5.067e+00 0.000 -1.781e+01
28.000 0.000 2.533e+00 2.533e+00 0.000 2.533e+00 0.000 -2.288e+01
29.000 0.000 -1.170e+00 -1.170e+00 0.000 -1.170e+00 0.000 -3.029e+01
30.000 0.000 4.149e-01 4.149e-01 0.000 4.149e-01 0.000 -2.712e+01
31.000 0.000 2.503e+00 2.503e+00 0.000 2.503e+00 0.000 -2.294e+01
32.000 0.000 1.240e+00 1.240e+00 0.000 1.240e+00 0.000 -2.547e+01
33.000 0.000 -3.921e+00 -3.921e+00 0.000 -3.921e+00 0.000 -3.579e+01
34.000 0.000 -3.979e+00 -3.979e+00 0.000 -3.979e+00 0.000 -3.590e+01
35.000 0.000 -6.036e-01 -6.036e-01 0.000 -6.036e-01 0.000 -2.915e+01
36.000 0.000 -1.766e+00 -1.766e+00 0.000 -1.766e+00 0.000 -3.148e+01
37.000 0.000 -9.508e+00 -9.508e+00 0.000 -9.508e+00 0.000 -4.696e+01
38.000 0.000 -9.476e+00 -9.476e+00 0.000 -9.476e+00 0.000 -4.690e+01
39.000 0.000 -3.361e+00 -3.361e+00 0.000 -3.361e+00 0.000 -3.467e+01
40.000 0.000 -3.435e+00 -3.435e+00 0.000 -3.435e+00 0.000 -3.482e+01
41.000 0.000 -8.470e+00 -8.470e+00 0.000 -8.470e+00 0.000 -4.489e+01
42.000 0.000 -1.281e+01 -1.281e+01 0.000 -1.281e+01 0.000 -5.356e+01
43.000 0.000 -5.862e+00 -5.862e+00 0.000 -5.862e+00 0.000 -3.967e+01
44.000 0.000 -4.571e+00 -4.571e+00 0.000 -4.571e+00 0.000 -3.709e+01
45.000 0.000 -8.392e+00 -8.392e+00 0.000 -8.392e+00 0.000 -4.473e+01
46.000 0.000 -2.437e+01 -2.437e+01 0.000 -2.437e+01 0.000 -7.668e+01
47.000 0.000 -8.133e+00 -8.133e+00 0.000 -8.133e+00 0.000 -4.421e+01
48.000 0.000 -5.656e+00 -5.656e+00 0.000 -5.656e+00 0.000 -3.926e+01
49.000 0.000 -7.367e+00 -7.367e+00 0.000 -7.367e+00 0.000 -4.268e+01
50.000 0.000 -6.203e+00 -6.203e+00 0.000 -6.203e+00 0.000 -4.035e+01
51.000 0.000 -3.020e+00 -3.020e+00 0.000 -3.020e+00 0.000 -3.399e+01
52.000 0.000 -3.027e+00 -3.027e+00 0.000 -3.027e+00 0.000 -3.400e+01
53.000 0.000 -6.706e+00 -6.706e+00 0.000 -6.706e+00 0.000 -4.136e+01
54.000 0.000 -8.332e+00 -8.332e+00 0.000 -8.332e+00 0.000 -4.461e+01
55.000 0.000 -4.701e+00 -4.701e+00 0.000 -4.701e+00 0.000 -3.735e+01
56.000 0.000 -4.267e+00 -4.267e+00 0.000 -4.267e+00 0.000 -3.648e+01
57.000 0.000 -6.669e+00 -6.669e+00 0.000 -6.669e+00 0.000 -4.128e+01
58.000 0.000 -9.131e+00 -9.131e+00 0.000 -9.131e+00 0.000 -4.621e+01
59.000 0.000 -9.739e+00 -9.739e+00 0.000 -9.739e+00 0.000 -4.742e+01
60.000 0.000 -1.051e+01 -1.051e+01 0.000 -1.051e+01 0.000 -4.897e+01
61.000 0.000 -8.426e+00 -8.426e+00 0.000 -8.426e+00 0.000 -4.480e+01
62.000 0.000 -6.270e+00 -6.270e+00 0.000 -6.270e+00 0.000 -4.049e+01
63.000 0.000 -7.223e+00 -7.223e+00 0.000 -7.223e+00 0.000 -4.239e+01
64.000 0.000 -1.386e+01 -1.386e+01 0.000 -1.386e+01 0.000 -5.566e+01
65.000 0.000 -1.644e+01 -1.644e+01 0.000 -1.644e+01 0.000 -6.082e+01
66.000 0.000 -7.715e+00 -7.715e+00 0.000 -7.715e+00 0.000 -4.338e+01
67.000 0.000 -5.756e+00 -5.756e+00 0.000 -5.756e+00 0.000 -3.946e+01
68.000 0.000 -7.265e+00 -7.265e+00 0.000 -7.265e+00 0.000 -4.248e+01
69.000 0.000 -1.215e+01 -1.215e+01 0.000 -1.215e+01 0.000 -5.224e+01
70.000 0.000 -1.385e+01 -1.385e+01 0.000 -1.385e+01 0.000 -5.564e+01
71.000 0.000 -1.010e+01 -1.010e+01 0.000 -1.010e+01 0.000 -4.815e+01
72.000 0.000 -9.633e+00 -9.633e+00 0.000 -9.633e+00 0.000 -4.721e+01
73.000 0.000 -1.139e+01 -1.139e+01 0.000 -1.139e+01 0.000 -5.074e+01
74.000 0.000 -1.066e+01 -1.066e+01 0.000 -1.066e+01 0.000 -4.927e+01
75.000 0.000 -8.004e+00 -8.004e+00 0.000 -8.004e+00 0.000 -4.395e+01
76.000 0.000 -7.238e+00 -7.238e+00 0.000 -7.238e+00 0.000 -4.242e+01
77.000 0.000 -8.594e+00 -8.594e+00 0.000 -8.594e+00 0.000 -4.513e+01
78.000 0.000 -1.017e+01 -1.017e+01 0.000 -1.017e+01 0.000 -4.829e+01
79.000 0.000 -8.719e+00 -8.719e+00 0.000 -8.719e+00 0.000 -4.538e+01
80.000 0.000 -7.132e+00 -7.132e+00 0.000 -7.132e+00 0.000 -4.221e+01
81.000 0.000 -7.278e+00 -7.278e+00 0.000 -7.278e+00 0.000 -4.250e+01
82.000 0.000 -8.499e+00 -8.499e+00 0.000 -8.499e+00 0.000 -4.494e+01
83.000 0.000 -8.501e+00 -8.501e+00 0.000 -8.501e+00 0.000 -4.495e+01
84.000 0.000 -7.360e+00 -7.360e+00 0.000 -7.360e+00 0.000 -4.267e+01
85.000 0.000 -7.268e+00 -7.268e+00 0.000 -7.268e+00 0.000 -4.248e+01
86.000 0.000 -8.522e+00 -8.522e+00 0.000 -8.522e+00 0.000 -4.499e+01
87.000 0.000 -9.031e+00 -9.031e+00 0.000 -9.031e+00 0.000 -4.601e+01
88.000 0.000 -7.510e+00 -7.510e+00 0.000 -7.510e+00 0.000 -4.297e+01
89.000 0.000 -6.646e+00 -6.646e+00 0.000 -6.646e+00 0.000 -4.124e+01
90.000 0.000 -7.688e+00 -7.688e+00 0.000 -7.688e+00 0.000 -4.332e+01
91.000 0.000 -9.804e+00 -9.804e+00 0.000 -9.804e+00 0.000 -4.755e+01
92.000 0.000 -8.720e+00 -8.720e+00 0.000 -8.720e+00 0.000 -4.539e+01
93.000 0.000 -6.253e+00 -6.253e+00 0.000 -6.253e+00 0.000 -4.045e+01
94.000 0.000 -5.752e+00 -5.752e+00 0.000 -5.752e+00 0.000 -3.945e+01
95.000 0.000 -7.536e+00 -7.536e+00 0.000 -7.536e+00 0.000 -4.302e+01
96.000 0.000 -9.244e+00 -9.244e+00 0.000 -9.244e+00 0.000 -4.643e+01
97.000 0.000 -6.717e+00 -6.717e+00 0.000 -6.717e+00 0.000 -4.138e+01
98.000 0.000 -4.711e+00 -4.711e+00 0.000 -4.711e+00 0.000 -3.737e+01
99.000 0.000 -4.931e+00 -4.931e+00 0.000 -4.931e+00 0.000 -3.781e+01
100.000 0.000 -6.321e+00 -6.321e+00 0.000 -6.321e+00 0.000 -4.059e+01
101.000 0.000 -5.909e+00 -5.909e+00 0.000 -5.909e+00 0.000 -3.976e+01
102.000 0.000 -4.561e+00 -4.561e+00 0.000 -4.561e+00 0.000 -3.707e+01
103.000 0.000 -4.426e+00 -4.426e+00 0.000 -4.426e+00 0.000 -3.680e+01
104.000 0.000 -4.356e+00 -4.356e+00 0.000 -4.356e+00 0.000 -3.666e+01
105.000 0.000 -3.018e+00 -3.018e+00 0.000 -3.018e+00 0.000 -3.398e+01
106.000 0.000 -2.375e+00 -2.375e+00 0.000 -2.375e+00 0.000 -3.270e+01
107.000 0.000 -3.665e+00 -3.665e+00 0.000 -3.665e+00 0.000 -3.528e+01
108.000 0.000 -4.808e+00 -4.808e+00 0.000 -4.808e+00 0.000 -3.756e+01
109.000 0.000 -2.537e+00 -2.537e+00 0.000 -2.537e+00 0.000 -3.302e+01
110.000 0.000 -8.699e-01 -8.699e-01 0.000 -8.699e-01 0.000 -2.969e+01
111.000 0.000 -1.097e+00 -1.097e+00 0.000 -1.097e+00 0.000 -3.014e+01
112.000 0.000 -1.782e+00 -1.782e+00 0.000 -1.782e+00 0.000 -3.151e+01
113.000 0.000 -1.426e+00 -1.426e+00 0.000 -1.426e+00 0.000 -3.080e+01
114.000 0.000 -1.463e+00 -1.463e+00 0.000 -1.463e+00 0.000 -3.087e+01
115.000 0.000 -2.297e+00 -2.297e+00 0.000 -2.297e+00 0.000 -3.254e+01
116.000 0.000 -1.382e+00 -1.382e+00 0.000 -1.382e+00 0.000 -3.071e+01
117.000 0.000 4.605e-01 4.605e-01 0.000 4.605e-01 0.000 -2.702e+01
118.000 0.000 1.041e+00 1.041e+00 0.000 1.041e+00 0.000 -2.586e+01
119.000 0.000 8.663e-01 8.663e-01 0.000 8.663e-01 0.000 -2.621e+01
120.000 0.000 1.160e+00 1.160e+00 0.000 1.160e+00 0.000 -2.563e+01
121.000 0.000 1.226e+00 1.226e+00 0.000 1.226e+00 0.000 -2.549e+01
122.000 0.000 1.764e-01 1.764e-01 0.000 1.764e-01 0.000 -2.759e+01
123.000 0.000 -4.447e-01 -4.447e-01 0.000 -4.447e-01 0.000 -2.884e+01
124.000 0.000 5.918e-01 5.918e-01 0.000 5.918e-01 0.000 -2.676e+01
125.000 0.000 1.085e+00 1.085e+00 0.000 1.085e+00 0.000 -2.578e+01
126.000 0.000 1.142e+00 1.142e+00 0.000 1.142e+00 0.000 -2.566e+01
127.000 0.000 2.475e+00 2.475e+00 0.000 2.475e+00 0.000 -2.300e+01
128.000 0.000 3.865e+00 3.865e+00 0.000 3.865e+00 0.000 -2.022e+01
129.000 0.000 4.177e+00 4.177e+00 0.000 4.177e+00 0.000 -1.959e+01
130.000 0.000 4.248e+00 4.248e+00 0.000 4.248e+00 0.000 -1.945e+01
131.000 0.000 4.867e+00 4.867e+00 0.000 4.867e+00 0.000 -1.821e+01
132.000 0.000 5.098e+00 5.098e+00 0.000 5.098e+00 0.000 -1.775e+01
133.000 0.000 4.527e+00 4.527e+00 0.000 4.527e+00 0.000 -1.889e+01
134.000 0.000 4.250e+00 4.250e+00 0.000 4.250e+00 0.000 -1.945e+01
135.000 0.000 4.535e+00 4.535e+00 0.000 4.535e+00 0.000 -1.888e+01
136.000 0.000 4.092e+00 4.092e+00 0.000 4.092e+00 0.000 -1.976e+01
137.000 0.000 2.987e+00 2.987e+00 0.000 2.987e+00 0.000 -2.197e+01
138.000 0.000 2.770e+00 2.770e+00 0.000 2.770e+00 0.000 -2.240e+01
139.000 0.000 2.797e+00 2.797e+00 0.000 2.797e+00 0.000 -2.235e+01
140.000 0.000 1.547e+00 1.547e+00 0.000 1.547e+00 0.000 -2.485e+01
141.000 0.000 1.568e-01 1.568e-01 0.000 1.568e-01 0.000 -2.763e+01
142.000 0.000 4.542e-01 4.542e-01 0.000 4.542e-01 0.000 -2.704e+01
143.000 0.000 3.633e-02 3.633e-02 0.000 3.633e-02 0.000 -2.787e+01
144.000 0.000 -2.066e+00 -2.066e+00 0.000 -2.066e+00 0.000 -3.208e+01
145.000 0.000 -2.691e+00 -2.691e+00 0.000 -2.691e+00 0.000 -3.333e+01
146.000 0.000 -2.113e+00 -2.113e+00 0.000 -2.113e+00 0.000 -3.217e+01
147.000 0.000 -3.705e+00 -3.705e+00 0.000 -3.705e+00 0.000 -3.536e+01
148.000 0.000 -5.211e+00 -5.211e+00 0.000 -5.211e+00 0.000 -3.837e+01
149.000 0.000 -3.762e+00 -3.762e+00 0.000 -3.762e+00 0.000 -3.547e+01
150.000 0.000 -4.405e+00 -4.405e+00 0.000 -4.405e+00 0.000 -3.676e+01
151.000 0.000 -7.390e+00 -7.390e+00 0.000 -7.390e+00 0.000 -4.273e+01
152.000 0.000 -6.173e+00 -6.173e+00 0.000 -6.173e+00 0.000 -4.029e+01
153.000 0.000 -5.236e+00 -5.236e+00 0.000 -5.236e+00 0.000 -3.842e+01
154.000 0.000 -7.751e+00 -7.751e+00 0.000 -7.751e+00 0.000 -4.345e+01
155.000 0.000 -8.367e+00 -8.367e+00 0.000 -8.367e+00 0.000 -4.468e+01
156.000 0.000 -7.123e+00 -7.123e+00 0.000 -7.123e+00 0.000 -4.219e+01
157.000 0.000 -1.051e+01 -1.051e+01 0.000 -1.051e+01 0.000 -4.897e+01
158.000 0.000 -1.448e+01 -1.448e+01 0.000 -1.448e+01 0.000 -5.691e+01
159.000 0.000 -1.049e+01 -1.049e+01 0.000 -1.049e+01 0.000 -4.892e+01
160.000 0.000 -1.381e+01 -1.381e+01 0.000 -1.381e+01 0.000 -5.557e+01
161.000 0.000 -1.945e+01 -1.945e+01 0.000 -1.945e+01 0.000 -6.685e+01
162.000 0.000 -1.182e+01 -1.182e+01 0.000 -1.182e+01 0.000 -5.159e+01
163.000 0.000 -1.349e+01 -1.349e+01 0.000 -1.349e+01 0.000 -5.492e+01
164.000 0.000 -1.089e+01 -1.089e+01 0.000 -1.089e+01 0.000 -4.972e+01
165.000 0.000 -6.793e+00 -6.793e+00 0.000 -6.793e+00 0.000 -4.153e+01
166.000 0.000 -7.624e+00 -7.624e+00 0.000 -7.624e+00 0.000 -4.319e+01
167.000 0.000 -1.046e+01 -1.046e+01 0.000 -1.046e+01 0.000 -4.886e+01
168.000 0.000 -9.244e+00 -9.244e+00 0.000 -9.244e+00 0.000 -4.643e+01
169.000 0.000 -1.094e+01 -1.094e+01 0.000 -1.094e+01 0.000 -4.982e+01
170.000 0.000 -1.566e+01 -1.566e+01 0.000 -1.566e+01 0.000 -5.927e+01
171.000 0.000 -1.244e+01 -1.244e+01 0.000 -1.244e+01 0.000 -5.282e+01
172.000 0.000 -1.318e+01 -1.318e+01 0.000 -1.318e+01 0.000 -5.430e+01
173.000 0.000 -1.021e+01 -1.021e+01 0.000 -1.021e+01 0.000 -4.837e+01
174.000 0.000 -7.200e+00 -7.200e+00 0.000 -7.200e+00 0.000 -4.235e+01
175.000 0.000 -9.556e+00 -9.556e+00 0.000 -9.556e+00 0.000 -4.706e+01
176.000 0.000 -2.229e+01 -2.229e+01 0.000 -2.229e+01 0.000 -7.253e+01
177.000 0.000 -2.167e+01 -2.167e+01 0.000 -2.167e+01 0.000 -7.129e+01
178.000 0.000 -2.615e+01 -2.615e+01 0.000 -2.615e+01 0.000 -8.024e+01
179.000 0.000 -1.040e+01 -1.040e+01 0.000 -1.040e+01 0.000 -4.874e+01
