# Supplementary material
Source: publisher figshare collection journal article supplement (https://frontiersin.figshare.com/ndownloader/files/24979811)
Supplement: Supplementary file 1 [file 24979811 › datasheet/elevation plane/-10.csv]

Theta [deg.] Phi [deg.] Abs(Gain)[dB ] Abs(??? )[dB ] Phase(??? )[deg.] Abs(??? )[dB ] Phase(??? )[deg.] Ax.Ratio[dB ]
------------------------------------------------------------------------------------------------------------------------------------------------------
-180.000 90.000 -7.320e+00 -7.320e+00 0.000 -7.320e+00 0.000 -4.259e+01
-179.000 90.000 -8.148e+00 -8.148e+00 0.000 -8.148e+00 0.000 -4.424e+01
-178.000 90.000 -9.906e+00 -9.906e+00 0.000 -9.906e+00 0.000 -4.776e+01
-177.000 90.000 -1.064e+01 -1.064e+01 0.000 -1.064e+01 0.000 -4.923e+01
-176.000 90.000 -9.927e+00 -9.927e+00 0.000 -9.927e+00 0.000 -4.780e+01
-175.000 90.000 -8.490e+00 -8.490e+00 0.000 -8.490e+00 0.000 -4.493e+01
-174.000 90.000 -7.727e+00 -7.727e+00 0.000 -7.727e+00 0.000 -4.340e+01
-173.000 90.000 -7.606e+00 -7.606e+00 0.000 -7.606e+00 0.000 -4.316e+01
-172.000 90.000 -6.930e+00 -6.930e+00 0.000 -6.930e+00 0.000 -4.181e+01
-171.000 90.000 -6.477e+00 -6.477e+00 0.000 -6.477e+00 0.000 -4.090e+01
-170.000 90.000 -7.379e+00 -7.379e+00 0.000 -7.379e+00 0.000 -4.270e+01
-169.000 90.000 -9.089e+00 -9.089e+00 0.000 -9.089e+00 0.000 -4.612e+01
-168.000 90.000 -9.588e+00 -9.588e+00 0.000 -9.588e+00 0.000 -4.712e+01
-167.000 90.000 -8.047e+00 -8.047e+00 0.000 -8.047e+00 0.000 -4.404e+01
-166.000 90.000 -6.428e+00 -6.428e+00 0.000 -6.428e+00 0.000 -4.080e+01
-165.000 90.000 -6.363e+00 -6.363e+00 0.000 -6.363e+00 0.000 -4.067e+01
-164.000 90.000 -7.781e+00 -7.781e+00 0.000 -7.781e+00 0.000 -4.351e+01
-163.000 90.000 -8.435e+00 -8.435e+00 0.000 -8.435e+00 0.000 -4.481e+01
-162.000 90.000 -8.158e+00 -8.158e+00 0.000 -8.158e+00 0.000 -4.426e+01
-161.000 90.000 -9.697e+00 -9.697e+00 0.000 -9.697e+00 0.000 -4.734e+01
-160.000 90.000 -1.387e+01 -1.387e+01 0.000 -1.387e+01 0.000 -5.569e+01
-159.000 90.000 -1.833e+01 -1.833e+01 0.000 -1.833e+01 0.000 -6.461e+01
-158.000 90.000 -2.235e+01 -2.235e+01 0.000 -2.235e+01 0.000 -7.265e+01
-157.000 90.000 -2.891e+01 -2.891e+01 0.000 -2.891e+01 0.000 -8.577e+01
-156.000 90.000 -2.197e+01 -2.197e+01 0.000 -2.197e+01 0.000 -7.190e+01
-155.000 90.000 -1.976e+01 -1.976e+01 0.000 -1.976e+01 0.000 -6.747e+01
-154.000 90.000 -1.563e+01 -1.563e+01 0.000 -1.563e+01 0.000 -5.920e+01
-153.000 90.000 -1.231e+01 -1.231e+01 0.000 -1.231e+01 0.000 -5.257e+01
-152.000 90.000 -1.144e+01 -1.144e+01 0.000 -1.144e+01 0.000 -5.082e+01
-151.000 90.000 -1.123e+01 -1.123e+01 0.000 -1.123e+01 0.000 -5.040e+01
-150.000 90.000 -1.031e+01 -1.031e+01 0.000 -1.031e+01 0.000 -4.857e+01
-149.000 90.000 -9.920e+00 -9.920e+00 0.000 -9.920e+00 0.000 -4.778e+01
-148.000 90.000 -9.644e+00 -9.644e+00 0.000 -9.644e+00 0.000 -4.723e+01
-147.000 90.000 -8.181e+00 -8.181e+00 0.000 -8.181e+00 0.000 -4.431e+01
-146.000 90.000 -7.002e+00 -7.002e+00 0.000 -7.002e+00 0.000 -4.195e+01
-145.000 90.000 -6.656e+00 -6.656e+00 0.000 -6.656e+00 0.000 -4.126e+01
-144.000 90.000 -5.967e+00 -5.967e+00 0.000 -5.967e+00 0.000 -3.988e+01
-143.000 90.000 -4.985e+00 -4.985e+00 0.000 -4.985e+00 0.000 -3.791e+01
-142.000 90.000 -4.649e+00 -4.649e+00 0.000 -4.649e+00 0.000 -3.724e+01
-141.000 90.000 -4.358e+00 -4.358e+00 0.000 -4.358e+00 0.000 -3.666e+01
-140.000 90.000 -3.278e+00 -3.278e+00 0.000 -3.278e+00 0.000 -3.450e+01
-139.000 90.000 -2.371e+00 -2.371e+00 0.000 -2.371e+00 0.000 -3.269e+01
-138.000 90.000 -2.153e+00 -2.153e+00 0.000 -2.153e+00 0.000 -3.225e+01
-137.000 90.000 -1.769e+00 -1.769e+00 0.000 -1.769e+00 0.000 -3.148e+01
-136.000 90.000 -8.153e-01 -8.153e-01 0.000 -8.153e-01 0.000 -2.958e+01
-135.000 90.000 -1.736e-01 -1.736e-01 0.000 -1.736e-01 0.000 -2.829e+01
-134.000 90.000 -1.993e-01 -1.993e-01 0.000 -1.993e-01 0.000 -2.834e+01
-133.000 90.000 -3.902e-01 -3.902e-01 0.000 -3.902e-01 0.000 -2.873e+01
-132.000 90.000 -3.921e-01 -3.921e-01 0.000 -3.921e-01 0.000 -2.873e+01
-131.000 90.000 -5.871e-01 -5.871e-01 0.000 -5.871e-01 0.000 -2.912e+01
-130.000 90.000 -1.250e+00 -1.250e+00 0.000 -1.250e+00 0.000 -3.045e+01
-129.000 90.000 -2.177e+00 -2.177e+00 0.000 -2.177e+00 0.000 -3.230e+01
-128.000 90.000 -3.286e+00 -3.286e+00 0.000 -3.286e+00 0.000 -3.452e+01
-127.000 90.000 -4.944e+00 -4.944e+00 0.000 -4.944e+00 0.000 -3.783e+01
-126.000 90.000 -7.378e+00 -7.378e+00 0.000 -7.378e+00 0.000 -4.270e+01
-125.000 90.000 -1.028e+01 -1.028e+01 0.000 -1.028e+01 0.000 -4.851e+01
-124.000 90.000 -1.270e+01 -1.270e+01 0.000 -1.270e+01 0.000 -5.334e+01
-123.000 90.000 -1.142e+01 -1.142e+01 0.000 -1.142e+01 0.000 -5.079e+01
-122.000 90.000 -8.032e+00 -8.032e+00 0.000 -8.032e+00 0.000 -4.401e+01
-121.000 90.000 -5.927e+00 -5.927e+00 0.000 -5.927e+00 0.000 -3.980e+01
-120.000 90.000 -5.239e+00 -5.239e+00 0.000 -5.239e+00 0.000 -3.842e+01
-119.000 90.000 -5.354e+00 -5.354e+00 0.000 -5.354e+00 0.000 -3.865e+01
-118.000 90.000 -5.920e+00 -5.920e+00 0.000 -5.920e+00 0.000 -3.979e+01
-117.000 90.000 -7.518e+00 -7.518e+00 0.000 -7.518e+00 0.000 -4.298e+01
-116.000 90.000 -1.171e+01 -1.171e+01 0.000 -1.171e+01 0.000 -5.137e+01
-115.000 90.000 -1.952e+01 -1.952e+01 0.000 -1.952e+01 0.000 -6.698e+01
-114.000 90.000 -1.177e+01 -1.177e+01 0.000 -1.177e+01 0.000 -5.148e+01
-113.000 90.000 -7.400e+00 -7.400e+00 0.000 -7.400e+00 0.000 -4.275e+01
-112.000 90.000 -5.931e+00 -5.931e+00 0.000 -5.931e+00 0.000 -3.981e+01
-111.000 90.000 -6.354e+00 -6.354e+00 0.000 -6.354e+00 0.000 -4.065e+01
-110.000 90.000 -8.789e+00 -8.789e+00 0.000 -8.789e+00 0.000 -4.552e+01
-109.000 90.000 -1.478e+01 -1.478e+01 0.000 -1.478e+01 0.000 -5.751e+01
-108.000 90.000 -1.803e+01 -1.803e+01 0.000 -1.803e+01 0.000 -6.401e+01
-107.000 90.000 -1.048e+01 -1.048e+01 0.000 -1.048e+01 0.000 -4.891e+01
-106.000 90.000 -7.643e+00 -7.643e+00 0.000 -7.643e+00 0.000 -4.323e+01
-105.000 90.000 -7.555e+00 -7.555e+00 0.000 -7.555e+00 0.000 -4.306e+01
-104.000 90.000 -9.895e+00 -9.895e+00 0.000 -9.895e+00 0.000 -4.774e+01
-103.000 90.000 -1.537e+01 -1.537e+01 0.000 -1.537e+01 0.000 -5.869e+01
-102.000 90.000 -1.762e+01 -1.762e+01 0.000 -1.762e+01 0.000 -6.319e+01
-101.000 90.000 -1.182e+01 -1.182e+01 0.000 -1.182e+01 0.000 -5.159e+01
-100.000 90.000 -9.128e+00 -9.128e+00 0.000 -9.128e+00 0.000 -4.620e+01
-99.000 90.000 -8.975e+00 -8.975e+00 0.000 -8.975e+00 0.000 -4.590e+01
-98.000 90.000 -1.173e+01 -1.173e+01 0.000 -1.173e+01 0.000 -5.141e+01
-97.000 90.000 -2.050e+01 -2.050e+01 0.000 -2.050e+01 0.000 -6.895e+01
-96.000 90.000 -1.548e+01 -1.548e+01 0.000 -1.548e+01 0.000 -5.891e+01
-95.000 90.000 -9.780e+00 -9.780e+00 0.000 -9.780e+00 0.000 -4.751e+01
-94.000 90.000 -8.742e+00 -8.742e+00 0.000 -8.742e+00 0.000 -4.543e+01
-93.000 90.000 -1.161e+01 -1.161e+01 0.000 -1.161e+01 0.000 -5.116e+01
-92.000 90.000 -2.439e+01 -2.439e+01 0.000 -2.439e+01 0.000 -7.673e+01
-91.000 90.000 -1.463e+01 -1.463e+01 0.000 -1.463e+01 0.000 -5.721e+01
-90.000 90.000 -9.502e+00 -9.502e+00 0.000 -9.502e+00 0.000 -4.695e+01
-89.000 90.000 -9.442e+00 -9.442e+00 0.000 -9.442e+00 0.000 -4.683e+01
-88.000 90.000 -1.438e+01 -1.438e+01 0.000 -1.438e+01 0.000 -5.671e+01
-87.000 90.000 -2.579e+01 -2.579e+01 0.000 -2.579e+01 0.000 -7.953e+01
-86.000 90.000 -1.223e+01 -1.223e+01 0.000 -1.223e+01 0.000 -5.240e+01
-85.000 90.000 -9.784e+00 -9.784e+00 0.000 -9.784e+00 0.000 -4.751e+01
-84.000 90.000 -1.217e+01 -1.217e+01 0.000 -1.217e+01 0.000 -5.228e+01
-83.000 90.000 -2.426e+01 -2.426e+01 0.000 -2.426e+01 0.000 -7.646e+01
-82.000 90.000 -1.570e+01 -1.570e+01 0.000 -1.570e+01 0.000 -5.935e+01
-81.000 90.000 -1.115e+01 -1.115e+01 0.000 -1.115e+01 0.000 -5.025e+01
-80.000 90.000 -1.245e+01 -1.245e+01 0.000 -1.245e+01 0.000 -5.284e+01
-79.000 90.000 -2.244e+01 -2.244e+01 0.000 -2.244e+01 0.000 -7.282e+01
-78.000 90.000 -1.700e+01 -1.700e+01 0.000 -1.700e+01 0.000 -6.195e+01
-77.000 90.000 -1.167e+01 -1.167e+01 0.000 -1.167e+01 0.000 -5.128e+01
-76.000 90.000 -1.289e+01 -1.289e+01 0.000 -1.289e+01 0.000 -5.373e+01
-75.000 90.000 -2.522e+01 -2.522e+01 0.000 -2.522e+01 0.000 -7.838e+01
-74.000 90.000 -1.493e+01 -1.493e+01 0.000 -1.493e+01 0.000 -5.780e+01
-73.000 90.000 -9.950e+00 -9.950e+00 0.000 -9.950e+00 0.000 -4.785e+01
-72.000 90.000 -1.068e+01 -1.068e+01 0.000 -1.068e+01 0.000 -4.931e+01
-71.000 90.000 -1.361e+01 -1.361e+01 0.000 -1.361e+01 0.000 -5.517e+01
-70.000 90.000 -7.941e+00 -7.941e+00 0.000 -7.941e+00 0.000 -4.383e+01
-69.000 90.000 -3.986e+00 -3.986e+00 0.000 -3.986e+00 0.000 -3.592e+01
-68.000 90.000 -2.938e+00 -2.938e+00 0.000 -2.938e+00 0.000 -3.382e+01
-67.000 90.000 -3.501e+00 -3.501e+00 0.000 -3.501e+00 0.000 -3.495e+01
-66.000 90.000 -3.270e+00 -3.270e+00 0.000 -3.270e+00 0.000 -3.449e+01
-65.000 90.000 -1.663e+00 -1.663e+00 0.000 -1.663e+00 0.000 -3.127e+01
-64.000 90.000 -9.167e-01 -9.167e-01 0.000 -9.167e-01 0.000 -2.978e+01
-63.000 90.000 -1.991e+00 -1.991e+00 0.000 -1.991e+00 0.000 -3.193e+01
-62.000 90.000 -5.116e+00 -5.116e+00 0.000 -5.116e+00 0.000 -3.818e+01
-61.000 90.000 -9.970e+00 -9.970e+00 0.000 -9.970e+00 0.000 -4.789e+01
-60.000 90.000 -1.333e+01 -1.333e+01 0.000 -1.333e+01 0.000 -5.460e+01
-59.000 90.000 -1.146e+01 -1.146e+01 0.000 -1.146e+01 0.000 -5.086e+01
-58.000 90.000 -7.766e+00 -7.766e+00 0.000 -7.766e+00 0.000 -4.348e+01
-57.000 90.000 -5.748e+00 -5.748e+00 0.000 -5.748e+00 0.000 -3.944e+01
-56.000 90.000 -6.464e+00 -6.464e+00 0.000 -6.464e+00 0.000 -4.087e+01
-55.000 90.000 -1.088e+01 -1.088e+01 0.000 -1.088e+01 0.000 -4.971e+01
-54.000 90.000 -1.775e+01 -1.775e+01 0.000 -1.775e+01 0.000 -6.344e+01
-53.000 90.000 -1.492e+01 -1.492e+01 0.000 -1.492e+01 0.000 -5.778e+01
-52.000 90.000 -1.903e+01 -1.903e+01 0.000 -1.903e+01 0.000 -6.601e+01
-51.000 90.000 -1.432e+01 -1.432e+01 0.000 -1.432e+01 0.000 -5.658e+01
-50.000 90.000 -7.405e+00 -7.405e+00 0.000 -7.405e+00 0.000 -4.276e+01
-49.000 90.000 -6.283e+00 -6.283e+00 0.000 -6.283e+00 0.000 -4.051e+01
-48.000 90.000 -1.056e+01 -1.056e+01 0.000 -1.056e+01 0.000 -4.907e+01
-47.000 90.000 -2.181e+01 -2.181e+01 0.000 -2.181e+01 0.000 -7.156e+01
-46.000 90.000 -1.016e+01 -1.016e+01 0.000 -1.016e+01 0.000 -4.827e+01
-45.000 90.000 -1.042e+01 -1.042e+01 0.000 -1.042e+01 0.000 -4.879e+01
-44.000 90.000 -2.993e+01 -2.993e+01 0.000 -2.993e+01 0.000 -8.781e+01
-43.000 90.000 -8.266e+00 -8.266e+00 0.000 -8.266e+00 0.000 -4.448e+01
-42.000 90.000 -4.161e+00 -4.161e+00 0.000 -4.161e+00 0.000 -3.627e+01
-41.000 90.000 -5.499e+00 -5.499e+00 0.000 -5.499e+00 0.000 -3.894e+01
-40.000 90.000 -9.817e+00 -9.817e+00 0.000 -9.817e+00 0.000 -4.758e+01
-39.000 90.000 -4.506e+00 -4.506e+00 0.000 -4.506e+00 0.000 -3.696e+01
-38.000 90.000 -2.013e+00 -2.013e+00 0.000 -2.013e+00 0.000 -3.197e+01
-37.000 90.000 -5.074e+00 -5.074e+00 0.000 -5.074e+00 0.000 -3.809e+01
-36.000 90.000 -1.859e+01 -1.859e+01 0.000 -1.859e+01 0.000 -6.512e+01
-35.000 90.000 -1.464e+00 -1.464e+00 0.000 -1.464e+00 0.000 -3.087e+01
-34.000 90.000 2.618e+00 2.618e+00 0.000 2.618e+00 0.000 -2.271e+01
-33.000 90.000 2.887e+00 2.887e+00 0.000 2.887e+00 0.000 -2.217e+01
-32.000 90.000 6.982e-01 6.982e-01 0.000 6.982e-01 0.000 -2.655e+01
-31.000 90.000 -4.527e-01 -4.527e-01 0.000 -4.527e-01 0.000 -2.885e+01
-30.000 90.000 1.473e+00 1.473e+00 0.000 1.473e+00 0.000 -2.500e+01
-29.000 90.000 2.264e+00 2.264e+00 0.000 2.264e+00 0.000 -2.342e+01
-28.000 90.000 2.022e+00 2.022e+00 0.000 2.022e+00 0.000 -2.390e+01
-27.000 90.000 3.236e+00 3.236e+00 0.000 3.236e+00 0.000 -2.147e+01
-26.000 90.000 5.144e+00 5.144e+00 0.000 5.144e+00 0.000 -1.766e+01
-25.000 90.000 5.715e+00 5.715e+00 0.000 5.715e+00 0.000 -1.652e+01
-24.000 90.000 4.436e+00 4.436e+00 0.000 4.436e+00 0.000 -1.907e+01
-23.000 90.000 1.338e+00 1.338e+00 0.000 1.338e+00 0.000 -2.527e+01
-22.000 90.000 -1.472e+00 -1.472e+00 0.000 -1.472e+00 0.000 -3.089e+01
-21.000 90.000 3.774e-01 3.774e-01 0.000 3.774e-01 0.000 -2.719e+01
-20.000 90.000 3.194e+00 3.194e+00 0.000 3.194e+00 0.000 -2.156e+01
-19.000 90.000 5.180e+00 5.180e+00 0.000 5.180e+00 0.000 -1.759e+01
-18.000 90.000 6.396e+00 6.396e+00 0.000 6.396e+00 0.000 -1.515e+01
-17.000 90.000 6.958e+00 6.958e+00 0.000 6.958e+00 0.000 -1.403e+01
-16.000 90.000 7.617e+00 7.617e+00 0.000 7.617e+00 0.000 -1.271e+01
-15.000 90.000 9.712e+00 9.712e+00 0.000 9.712e+00 0.000 -8.522e+00
-14.000 90.000 1.253e+01 1.253e+01 0.000 1.253e+01 0.000 -2.891e+00
-13.000 90.000 1.460e+01 1.460e+01 0.000 1.460e+01 0.000 1.246e+00
-12.000 90.000 1.547e+01 1.547e+01 0.000 1.547e+01 0.000 2.997e+00
-11.000 90.000 1.519e+01 1.519e+01 0.000 1.519e+01 0.000 2.440e+00
-10.000 90.000 1.399e+01 1.399e+01 0.000 1.399e+01 0.000 3.282e-02
-9.000 90.000 1.228e+01 1.228e+01 0.000 1.228e+01 0.000 -3.392e+00
-8.000 90.000 1.064e+01 1.064e+01 0.000 1.064e+01 0.000 -6.659e+00
-7.000 90.000 9.581e+00 9.581e+00 0.000 9.581e+00 0.000 -8.784e+00
-6.000 90.000 9.068e+00 9.068e+00 0.000 9.068e+00 0.000 -9.809e+00
-5.000 90.000 8.657e+00 8.657e+00 0.000 8.657e+00 0.000 -1.063e+01
-4.000 90.000 8.051e+00 8.051e+00 0.000 8.051e+00 0.000 -1.184e+01
-3.000 90.000 7.325e+00 7.325e+00 0.000 7.325e+00 0.000 -1.330e+01
-2.000 90.000 6.754e+00 6.754e+00 0.000 6.754e+00 0.000 -1.444e+01
-1.000 90.000 6.645e+00 6.645e+00 0.000 6.645e+00 0.000 -1.466e+01
0.000 90.000 7.034e+00 7.034e+00 0.000 7.034e+00 0.000 -1.388e+01
1.000 90.000 7.535e+00 7.535e+00 0.000 7.535e+00 0.000 -1.288e+01
2.000 90.000 7.856e+00 7.856e+00 0.000 7.856e+00 0.000 -1.223e+01
3.000 90.000 8.047e+00 8.047e+00 0.000 8.047e+00 0.000 -1.185e+01
4.000 90.000 8.255e+00 8.255e+00 0.000 8.255e+00 0.000 -1.144e+01
5.000 90.000 8.504e+00 8.504e+00 0.000 8.504e+00 0.000 -1.094e+01
6.000 90.000 8.732e+00 8.732e+00 0.000 8.732e+00 0.000 -1.048e+01
7.000 90.000 8.863e+00 8.863e+00 0.000 8.863e+00 0.000 -1.022e+01
8.000 90.000 8.869e+00 8.869e+00 0.000 8.869e+00 0.000 -1.021e+01
9.000 90.000 8.777e+00 8.777e+00 0.000 8.777e+00 0.000 -1.039e+01
10.000 90.000 8.628e+00 8.628e+00 0.000 8.628e+00 0.000 -1.069e+01
11.000 90.000 8.413e+00 8.413e+00 0.000 8.413e+00 0.000 -1.112e+01
12.000 90.000 8.073e+00 8.073e+00 0.000 8.073e+00 0.000 -1.180e+01
13.000 90.000 7.558e+00 7.558e+00 0.000 7.558e+00 0.000 -1.283e+01
14.000 90.000 6.828e+00 6.828e+00 0.000 6.828e+00 0.000 -1.429e+01
15.000 90.000 5.801e+00 5.801e+00 0.000 5.801e+00 0.000 -1.634e+01
16.000 90.000 4.482e+00 4.482e+00 0.000 4.482e+00 0.000 -1.898e+01
17.000 90.000 3.305e+00 3.305e+00 0.000 3.305e+00 0.000 -2.134e+01
18.000 90.000 2.898e+00 2.898e+00 0.000 2.898e+00 0.000 -2.215e+01
19.000 90.000 2.837e+00 2.837e+00 0.000 2.837e+00 0.000 -2.227e+01
20.000 90.000 2.362e+00 2.362e+00 0.000 2.362e+00 0.000 -2.322e+01
21.000 90.000 2.580e+00 2.580e+00 0.000 2.580e+00 0.000 -2.279e+01
22.000 90.000 4.945e+00 4.945e+00 0.000 4.945e+00 0.000 -1.806e+01
23.000 90.000 7.210e+00 7.210e+00 0.000 7.210e+00 0.000 -1.353e+01
24.000 90.000 7.780e+00 7.780e+00 0.000 7.780e+00 0.000 -1.239e+01
25.000 90.000 6.107e+00 6.107e+00 0.000 6.107e+00 0.000 -1.573e+01
26.000 90.000 1.974e+00 1.974e+00 0.000 1.974e+00 0.000 -2.400e+01
27.000 90.000 1.394e+00 1.394e+00 0.000 1.394e+00 0.000 -2.516e+01
28.000 90.000 5.048e+00 5.048e+00 0.000 5.048e+00 0.000 -1.785e+01
29.000 90.000 6.458e+00 6.458e+00 0.000 6.458e+00 0.000 -1.503e+01
30.000 90.000 6.328e+00 6.328e+00 0.000 6.328e+00 0.000 -1.529e+01
31.000 90.000 6.536e+00 6.536e+00 0.000 6.536e+00 0.000 -1.487e+01
32.000 90.000 7.624e+00 7.624e+00 0.000 7.624e+00 0.000 -1.270e+01
33.000 90.000 8.091e+00 8.091e+00 0.000 8.091e+00 0.000 -1.176e+01
34.000 90.000 6.992e+00 6.992e+00 0.000 6.992e+00 0.000 -1.396e+01
35.000 90.000 3.935e+00 3.935e+00 0.000 3.935e+00 0.000 -2.008e+01
36.000 90.000 -7.606e-01 -7.606e-01 0.000 -7.606e-01 0.000 -2.947e+01
37.000 90.000 -3.296e+00 -3.296e+00 0.000 -3.296e+00 0.000 -3.454e+01
38.000 90.000 -4.709e+00 -4.709e+00 0.000 -4.709e+00 0.000 -3.736e+01
39.000 90.000 -1.329e+01 -1.329e+01 0.000 -1.329e+01 0.000 -5.453e+01
40.000 90.000 -1.025e+01 -1.025e+01 0.000 -1.025e+01 0.000 -4.845e+01
41.000 90.000 -3.261e+00 -3.261e+00 0.000 -3.261e+00 0.000 -3.447e+01
42.000 90.000 -2.899e+00 -2.899e+00 0.000 -2.899e+00 0.000 -3.374e+01
43.000 90.000 -7.978e+00 -7.978e+00 0.000 -7.978e+00 0.000 -4.390e+01
44.000 90.000 -1.396e+01 -1.396e+01 0.000 -1.396e+01 0.000 -5.586e+01
45.000 90.000 -5.783e+00 -5.783e+00 0.000 -5.783e+00 0.000 -3.951e+01
46.000 90.000 -4.956e+00 -4.956e+00 0.000 -4.956e+00 0.000 -3.786e+01
47.000 90.000 -9.705e+00 -9.705e+00 0.000 -9.705e+00 0.000 -4.736e+01
48.000 90.000 -2.439e+01 -2.439e+01 0.000 -2.439e+01 0.000 -7.673e+01
49.000 90.000 -1.192e+01 -1.192e+01 0.000 -1.192e+01 0.000 -5.179e+01
50.000 90.000 -1.266e+01 -1.266e+01 0.000 -1.266e+01 0.000 -5.326e+01
51.000 90.000 -1.867e+01 -1.867e+01 0.000 -1.867e+01 0.000 -6.528e+01
52.000 90.000 -1.040e+01 -1.040e+01 0.000 -1.040e+01 0.000 -4.875e+01
53.000 90.000 -7.889e+00 -7.889e+00 0.000 -7.889e+00 0.000 -4.372e+01
54.000 90.000 -9.559e+00 -9.559e+00 0.000 -9.559e+00 0.000 -4.706e+01
55.000 90.000 -1.031e+01 -1.031e+01 0.000 -1.031e+01 0.000 -4.857e+01
56.000 90.000 -6.907e+00 -6.907e+00 0.000 -6.907e+00 0.000 -4.176e+01
57.000 90.000 -5.754e+00 -5.754e+00 0.000 -5.754e+00 0.000 -3.945e+01
58.000 90.000 -7.798e+00 -7.798e+00 0.000 -7.798e+00 0.000 -4.354e+01
59.000 90.000 -1.408e+01 -1.408e+01 0.000 -1.408e+01 0.000 -5.610e+01
60.000 90.000 -3.089e+01 -3.089e+01 0.000 -3.089e+01 0.000 -8.972e+01
61.000 90.000 -2.500e+01 -2.500e+01 0.000 -2.500e+01 0.000 -7.795e+01
62.000 90.000 -2.064e+01 -2.064e+01 0.000 -2.064e+01 0.000 -6.923e+01
63.000 90.000 -1.326e+01 -1.326e+01 0.000 -1.326e+01 0.000 -5.446e+01
64.000 90.000 -1.083e+01 -1.083e+01 0.000 -1.083e+01 0.000 -4.960e+01
65.000 90.000 -1.290e+01 -1.290e+01 0.000 -1.290e+01 0.000 -5.375e+01
66.000 90.000 -1.685e+01 -1.685e+01 0.000 -1.685e+01 0.000 -6.165e+01
67.000 90.000 -1.034e+01 -1.034e+01 0.000 -1.034e+01 0.000 -4.862e+01
68.000 90.000 -7.214e+00 -7.214e+00 0.000 -7.214e+00 0.000 -4.237e+01
69.000 90.000 -7.810e+00 -7.810e+00 0.000 -7.810e+00 0.000 -4.357e+01
70.000 90.000 -1.180e+01 -1.180e+01 0.000 -1.180e+01 0.000 -5.156e+01
71.000 90.000 -1.261e+01 -1.261e+01 0.000 -1.261e+01 0.000 -5.318e+01
72.000 90.000 -8.987e+00 -8.987e+00 0.000 -8.987e+00 0.000 -4.592e+01
73.000 90.000 -8.810e+00 -8.810e+00 0.000 -8.810e+00 0.000 -4.557e+01
74.000 90.000 -1.309e+01 -1.309e+01 0.000 -1.309e+01 0.000 -5.412e+01
75.000 90.000 -2.417e+01 -2.417e+01 0.000 -2.417e+01 0.000 -7.628e+01
76.000 90.000 -1.466e+01 -1.466e+01 0.000 -1.466e+01 0.000 -5.727e+01
77.000 90.000 -1.308e+01 -1.308e+01 0.000 -1.308e+01 0.000 -5.410e+01
78.000 90.000 -1.768e+01 -1.768e+01 0.000 -1.768e+01 0.000 -6.330e+01
79.000 90.000 -1.961e+01 -1.961e+01 0.000 -1.961e+01 0.000 -6.717e+01
80.000 90.000 -1.301e+01 -1.301e+01 0.000 -1.301e+01 0.000 -5.397e+01
81.000 90.000 -1.231e+01 -1.231e+01 0.000 -1.231e+01 0.000 -5.257e+01
82.000 90.000 -1.761e+01 -1.761e+01 0.000 -1.761e+01 0.000 -6.316e+01
83.000 90.000 -2.165e+01 -2.165e+01 0.000 -2.165e+01 0.000 -7.125e+01
84.000 90.000 -1.230e+01 -1.230e+01 0.000 -1.230e+01 0.000 -5.255e+01
85.000 90.000 -1.044e+01 -1.044e+01 0.000 -1.044e+01 0.000 -4.883e+01
86.000 90.000 -1.324e+01 -1.324e+01 0.000 -1.324e+01 0.000 -5.443e+01
87.000 90.000 -2.502e+01 -2.502e+01 0.000 -2.502e+01 0.000 -7.799e+01
88.000 90.000 -1.441e+01 -1.441e+01 0.000 -1.441e+01 0.000 -5.678e+01
89.000 90.000 -1.007e+01 -1.007e+01 0.000 -1.007e+01 0.000 -4.808e+01
90.000 90.000 -1.031e+01 -1.031e+01 0.000 -1.031e+01 0.000 -4.856e+01
91.000 90.000 -1.522e+01 -1.522e+01 0.000 -1.522e+01 0.000 -5.839e+01
92.000 90.000 -2.077e+01 -2.077e+01 0.000 -2.077e+01 0.000 -6.949e+01
93.000 90.000 -1.194e+01 -1.194e+01 0.000 -1.194e+01 0.000 -5.182e+01
94.000 90.000 -9.256e+00 -9.256e+00 0.000 -9.256e+00 0.000 -4.646e+01
95.000 90.000 -1.013e+01 -1.013e+01 0.000 -1.013e+01 0.000 -4.820e+01
96.000 90.000 -1.495e+01 -1.495e+01 0.000 -1.495e+01 0.000 -5.785e+01
97.000 90.000 -1.878e+01 -1.878e+01 0.000 -1.878e+01 0.000 -6.550e+01
98.000 90.000 -1.168e+01 -1.168e+01 0.000 -1.168e+01 0.000 -5.130e+01
99.000 90.000 -8.842e+00 -8.842e+00 0.000 -8.842e+00 0.000 -4.563e+01
100.000 90.000 -8.933e+00 -8.933e+00 0.000 -8.933e+00 0.000 -4.581e+01
101.000 90.000 -1.193e+01 -1.193e+01 0.000 -1.193e+01 0.000 -5.180e+01
102.000 90.000 -1.839e+01 -1.839e+01 0.000 -1.839e+01 0.000 -6.473e+01
103.000 90.000 -1.379e+01 -1.379e+01 0.000 -1.379e+01 0.000 -5.553e+01
104.000 90.000 -9.037e+00 -9.037e+00 0.000 -9.037e+00 0.000 -4.602e+01
105.000 90.000 -7.539e+00 -7.539e+00 0.000 -7.539e+00 0.000 -4.302e+01
106.000 90.000 -8.526e+00 -8.526e+00 0.000 -8.526e+00 0.000 -4.500e+01
107.000 90.000 -1.222e+01 -1.222e+01 0.000 -1.222e+01 0.000 -5.239e+01
108.000 90.000 -1.667e+01 -1.667e+01 0.000 -1.667e+01 0.000 -6.129e+01
109.000 90.000 -1.265e+01 -1.265e+01 0.000 -1.265e+01 0.000 -5.324e+01
110.000 90.000 -9.234e+00 -9.234e+00 0.000 -9.234e+00 0.000 -4.641e+01
111.000 90.000 -7.577e+00 -7.577e+00 0.000 -7.577e+00 0.000 -4.310e+01
112.000 90.000 -7.040e+00 -7.040e+00 0.000 -7.040e+00 0.000 -4.203e+01
113.000 90.000 -7.851e+00 -7.851e+00 0.000 -7.851e+00 0.000 -4.365e+01
114.000 90.000 -1.090e+01 -1.090e+01 0.000 -1.090e+01 0.000 -4.974e+01
115.000 90.000 -1.658e+01 -1.658e+01 0.000 -1.658e+01 0.000 -6.110e+01
116.000 90.000 -1.301e+01 -1.301e+01 0.000 -1.301e+01 0.000 -5.396e+01
117.000 90.000 -8.546e+00 -8.546e+00 0.000 -8.546e+00 0.000 -4.504e+01
118.000 90.000 -6.446e+00 -6.446e+00 0.000 -6.446e+00 0.000 -4.084e+01
119.000 90.000 -5.440e+00 -5.440e+00 0.000 -5.440e+00 0.000 -3.883e+01
120.000 90.000 -5.173e+00 -5.173e+00 0.000 -5.173e+00 0.000 -3.829e+01
121.000 90.000 -5.927e+00 -5.927e+00 0.000 -5.927e+00 0.000 -3.980e+01
122.000 90.000 -7.952e+00 -7.952e+00 0.000 -7.952e+00 0.000 -4.385e+01
123.000 90.000 -1.086e+01 -1.086e+01 0.000 -1.086e+01 0.000 -4.966e+01
124.000 90.000 -1.298e+01 -1.298e+01 0.000 -1.298e+01 0.000 -5.391e+01
125.000 90.000 -1.155e+01 -1.155e+01 0.000 -1.155e+01 0.000 -5.104e+01
126.000 90.000 -7.725e+00 -7.725e+00 0.000 -7.725e+00 0.000 -4.340e+01
127.000 90.000 -4.774e+00 -4.774e+00 0.000 -4.774e+00 0.000 -3.749e+01
128.000 90.000 -3.160e+00 -3.160e+00 0.000 -3.160e+00 0.000 -3.427e+01
129.000 90.000 -2.238e+00 -2.238e+00 0.000 -2.238e+00 0.000 -3.242e+01
130.000 90.000 -1.372e+00 -1.372e+00 0.000 -1.372e+00 0.000 -3.069e+01
131.000 90.000 -6.670e-01 -6.670e-01 0.000 -6.670e-01 0.000 -2.928e+01
132.000 90.000 -4.227e-01 -4.227e-01 0.000 -4.227e-01 0.000 -2.879e+01
133.000 90.000 -4.308e-01 -4.308e-01 0.000 -4.308e-01 0.000 -2.881e+01
134.000 90.000 -4.090e-01 -4.090e-01 0.000 -4.090e-01 0.000 -2.876e+01
135.000 90.000 -6.386e-01 -6.386e-01 0.000 -6.386e-01 0.000 -2.922e+01
136.000 90.000 -1.323e+00 -1.323e+00 0.000 -1.323e+00 0.000 -3.059e+01
137.000 90.000 -1.829e+00 -1.829e+00 0.000 -1.829e+00 0.000 -3.160e+01
138.000 90.000 -1.777e+00 -1.777e+00 0.000 -1.777e+00 0.000 -3.150e+01
139.000 90.000 -2.109e+00 -2.109e+00 0.000 -2.109e+00 0.000 -3.216e+01
140.000 90.000 -3.349e+00 -3.349e+00 0.000 -3.349e+00 0.000 -3.464e+01
141.000 90.000 -4.446e+00 -4.446e+00 0.000 -4.446e+00 0.000 -3.684e+01
142.000 90.000 -4.466e+00 -4.466e+00 0.000 -4.466e+00 0.000 -3.688e+01
143.000 90.000 -4.827e+00 -4.827e+00 0.000 -4.827e+00 0.000 -3.760e+01
144.000 90.000 -6.230e+00 -6.230e+00 0.000 -6.230e+00 0.000 -4.041e+01
145.000 90.000 -7.366e+00 -7.366e+00 0.000 -7.366e+00 0.000 -4.268e+01
146.000 90.000 -7.383e+00 -7.383e+00 0.000 -7.383e+00 0.000 -4.271e+01
147.000 90.000 -7.736e+00 -7.736e+00 0.000 -7.736e+00 0.000 -4.342e+01
148.000 90.000 -8.974e+00 -8.974e+00 0.000 -8.974e+00 0.000 -4.589e+01
149.000 90.000 -1.083e+01 -1.083e+01 0.000 -1.083e+01 0.000 -4.960e+01
150.000 90.000 -1.330e+01 -1.330e+01 0.000 -1.330e+01 0.000 -5.454e+01
151.000 90.000 -1.494e+01 -1.494e+01 0.000 -1.494e+01 0.000 -5.782e+01
152.000 90.000 -1.450e+01 -1.450e+01 0.000 -1.450e+01 0.000 -5.695e+01
153.000 90.000 -1.497e+01 -1.497e+01 0.000 -1.497e+01 0.000 -5.788e+01
154.000 90.000 -1.671e+01 -1.671e+01 0.000 -1.671e+01 0.000 -6.136e+01
155.000 90.000 -1.868e+01 -1.868e+01 0.000 -1.868e+01 0.000 -6.530e+01
156.000 90.000 -2.364e+01 -2.364e+01 0.000 -2.364e+01 0.000 -7.522e+01
157.000 90.000 -2.024e+01 -2.024e+01 0.000 -2.024e+01 0.000 -6.843e+01
158.000 90.000 -1.519e+01 -1.519e+01 0.000 -1.519e+01 0.000 -5.832e+01
159.000 90.000 -1.467e+01 -1.467e+01 0.000 -1.467e+01 0.000 -5.728e+01
160.000 90.000 -1.346e+01 -1.346e+01 0.000 -1.346e+01 0.000 -5.486e+01
161.000 90.000 -9.953e+00 -9.953e+00 0.000 -9.953e+00 0.000 -4.785e+01
162.000 90.000 -8.396e+00 -8.396e+00 0.000 -8.396e+00 0.000 -4.474e+01
163.000 90.000 -8.348e+00 -8.348e+00 0.000 -8.348e+00 0.000 -4.464e+01
164.000 90.000 -7.842e+00 -7.842e+00 0.000 -7.842e+00 0.000 -4.363e+01
165.000 90.000 -7.524e+00 -7.524e+00 0.000 -7.524e+00 0.000 -4.299e+01
166.000 90.000 -9.062e+00 -9.062e+00 0.000 -9.062e+00 0.000 -4.607e+01
167.000 90.000 -1.222e+01 -1.222e+01 0.000 -1.222e+01 0.000 -5.239e+01
168.000 90.000 -1.375e+01 -1.375e+01 0.000 -1.375e+01 0.000 -5.545e+01
169.000 90.000 -1.181e+01 -1.181e+01 0.000 -1.181e+01 0.000 -5.156e+01
170.000 90.000 -9.002e+00 -9.002e+00 0.000 -9.002e+00 0.000 -4.595e+01
171.000 90.000 -7.760e+00 -7.760e+00 0.000 -7.760e+00 0.000 -4.347e+01
172.000 90.000 -8.275e+00 -8.275e+00 0.000 -8.275e+00 0.000 -4.450e+01
173.000 90.000 -8.681e+00 -8.681e+00 0.000 -8.681e+00 0.000 -4.531e+01
174.000 90.000 -8.371e+00 -8.371e+00 0.000 -8.371e+00 0.000 -4.469e+01
175.000 90.000 -9.145e+00 -9.145e+00 0.000 -9.145e+00 0.000 -4.624e+01
176.000 90.000 -1.059e+01 -1.059e+01 0.000 -1.059e+01 0.000 -4.913e+01
177.000 90.000 -1.095e+01 -1.095e+01 0.000 -1.095e+01 0.000 -4.985e+01
178.000 90.000 -1.014e+01 -1.014e+01 0.000 -1.014e+01 0.000 -4.823e+01
179.000 90.000 -8.335e+00 -8.335e+00 0.000 -8.335e+00 0.000 -4.462e+01
