# Supplementary material
Source: publisher figshare collection journal article supplement (https://frontiersin.figshare.com/ndownloader/files/24979811)
Supplement: Supplementary file 1 [file 24979811 › datasheet/elevation plane/10.csv]

Theta [deg.] Phi [deg.] Abs(Gain)[dB ] Abs(Theta)[dB ] Phase(Theta)[deg.] Abs(Phi )[dB ] Phase(Phi )[deg.] Ax.Ratio[dB ]
------------------------------------------------------------------------------------------------------------------------------------------------------
-180.000 90.000 -6.819e+00 -2.848e+01 329.937 -6.849e+00 152.788 4.000e+01
-179.000 90.000 -7.487e+00 -2.925e+01 346.246 -7.516e+00 156.587 3.730e+01
-178.000 90.000 -9.116e+00 -4.033e+01 358.128 -9.119e+00 171.260 4.000e+01
-177.000 90.000 -9.795e+00 -3.878e+01 199.480 -9.801e+00 184.837 4.000e+01
-176.000 90.000 -9.503e+00 -3.495e+01 251.474 -9.516e+00 182.134 2.601e+01
-175.000 90.000 -8.638e+00 -2.919e+01 301.888 -8.677e+00 171.683 2.288e+01
-174.000 90.000 -8.081e+00 -2.685e+01 317.820 -8.139e+00 169.925 2.429e+01
-173.000 90.000 -8.222e+00 -3.113e+01 321.868 -8.245e+00 182.513 2.663e+01
-172.000 90.000 -7.978e+00 -4.304e+01 172.218 -7.980e+00 201.879 4.000e+01
-171.000 90.000 -7.840e+00 -3.158e+01 164.837 -7.858e+00 213.642 2.620e+01
-170.000 90.000 -9.173e+00 -3.405e+01 207.870 -9.187e+00 215.154 4.000e+01
-169.000 90.000 -1.153e+01 -2.823e+01 279.785 -1.162e+01 210.831 1.723e+01
-168.000 90.000 -1.249e+01 -2.441e+01 293.019 -1.277e+01 212.675 1.178e+01
-167.000 90.000 -1.069e+01 -2.650e+01 296.150 -1.081e+01 225.153 1.620e+01
-166.000 90.000 -8.233e+00 -4.171e+01 309.538 -8.235e+00 236.157 3.385e+01
-165.000 90.000 -7.358e+00 -3.117e+01 111.856 -7.376e+00 247.957 2.699e+01
-164.000 90.000 -8.091e+00 -2.853e+01 122.641 -8.130e+00 268.805 2.554e+01
-163.000 90.000 -8.582e+00 -3.069e+01 149.015 -8.609e+00 299.199 2.819e+01
-162.000 90.000 -8.613e+00 -3.317e+01 184.963 -8.629e+00 324.167 2.825e+01
-161.000 90.000 -1.035e+01 -4.356e+01 216.426 -1.036e+01 343.821 3.521e+01
-160.000 90.000 -1.398e+01 -3.369e+01 13.908 -1.403e+01 13.436 4.000e+01
-159.000 90.000 -1.596e+01 -2.822e+01 19.985 -1.623e+01 53.367 1.757e+01
-158.000 90.000 -1.820e+01 -2.938e+01 32.436 -1.855e+01 69.939 1.560e+01
-157.000 90.000 -2.500e+01 -3.229e+01 84.363 -2.590e+01 44.158 1.137e+01
-156.000 90.000 -2.264e+01 -2.919e+01 126.103 -2.372e+01 339.873 1.224e+01
-155.000 90.000 -1.896e+01 -3.018e+01 145.741 -1.930e+01 358.602 1.669e+01
-154.000 90.000 -1.485e+01 -3.270e+01 210.404 -1.492e+01 26.395 4.000e+01
-153.000 90.000 -1.240e+01 -2.669e+01 247.644 -1.256e+01 44.432 2.250e+01
-152.000 90.000 -1.261e+01 -2.519e+01 250.674 -1.285e+01 69.009 4.000e+01
-151.000 90.000 -1.246e+01 -2.914e+01 255.648 -1.255e+01 110.715 2.152e+01
-150.000 90.000 -1.036e+01 -3.539e+01 336.090 -1.038e+01 142.918 3.789e+01
-149.000 90.000 -9.901e+00 -2.786e+01 13.084 -9.971e+00 167.267 2.522e+01
-148.000 90.000 -1.038e+01 -2.666e+01 16.539 -1.048e+01 205.166 3.286e+01
-147.000 90.000 -8.271e+00 -2.934e+01 28.800 -8.305e+00 244.880 2.568e+01
-146.000 90.000 -6.285e+00 -3.232e+01 65.775 -6.296e+00 268.038 3.448e+01
-145.000 90.000 -6.147e+00 -3.297e+01 104.745 -6.156e+00 290.046 4.000e+01
-144.000 90.000 -6.359e+00 -3.255e+01 151.379 -6.370e+00 321.878 4.000e+01
-143.000 90.000 -5.228e+00 -2.829e+01 179.425 -5.250e+00 354.384 4.000e+01
-142.000 90.000 -4.177e+00 -2.604e+01 180.251 -4.205e+00 19.795 3.139e+01
-141.000 90.000 -3.863e+00 -2.742e+01 173.369 -3.883e+00 45.482 2.561e+01
-140.000 90.000 -3.447e+00 -3.485e+01 177.646 -3.450e+00 73.951 3.165e+01
-139.000 90.000 -2.758e+00 -3.491e+01 283.830 -2.761e+00 100.873 4.000e+01
-138.000 90.000 -2.280e+00 -2.848e+01 287.262 -2.291e+00 126.786 3.573e+01
-137.000 90.000 -1.761e+00 -2.805e+01 282.139 -1.771e+00 153.670 2.842e+01
-136.000 90.000 -1.031e+00 -3.101e+01 293.997 -1.035e+00 178.613 3.086e+01
-135.000 90.000 -6.361e-01 -3.086e+01 336.556 -6.402e-01 200.890 3.334e+01
-134.000 90.000 -7.179e-01 -2.710e+01 351.864 -7.279e-01 224.391 2.838e+01
-133.000 90.000 -6.733e-01 -2.538e+01 351.962 -6.880e-01 250.322 2.488e+01
-132.000 90.000 -3.296e-01 -2.522e+01 352.071 -3.437e-01 274.306 2.508e+01
-131.000 90.000 -3.502e-01 -2.569e+01 354.639 -3.629e-01 295.006 2.661e+01
-130.000 90.000 -1.044e+00 -2.665e+01 356.977 -1.056e+00 316.025 2.927e+01
-129.000 90.000 -2.048e+00 -2.897e+01 1.289 -2.057e+00 339.787 3.565e+01
-128.000 90.000 -3.078e+00 -3.245e+01 27.039 -3.083e+00 4.242 3.761e+01
-127.000 90.000 -4.584e+00 -2.998e+01 65.928 -4.597e+00 27.767 2.958e+01
-126.000 90.000 -7.107e+00 -2.608e+01 68.636 -7.163e+00 54.166 3.107e+01
-125.000 90.000 -1.047e+01 -2.428e+01 57.425 -1.066e+01 91.589 1.889e+01
-124.000 90.000 -1.283e+01 -2.406e+01 43.006 -1.317e+01 149.227 1.131e+01
-123.000 90.000 -1.103e+01 -2.480e+01 30.036 -1.122e+01 209.191 4.000e+01
-122.000 90.000 -7.800e+00 -2.569e+01 21.425 -7.871e+00 245.659 2.102e+01
-121.000 90.000 -5.817e+00 -2.591e+01 15.995 -5.860e+00 269.272 2.044e+01
-120.000 90.000 -5.243e+00 -2.560e+01 9.232 -5.284e+00 290.105 2.047e+01
-119.000 90.000 -5.584e+00 -2.562e+01 0.440 -5.627e+00 312.646 2.264e+01
-118.000 90.000 -6.397e+00 -2.660e+01 353.367 -6.439e+00 336.460 3.096e+01
-117.000 90.000 -8.038e+00 -2.830e+01 353.925 -8.079e+00 359.606 4.000e+01
-116.000 90.000 -1.167e+01 -2.901e+01 2.801 -1.176e+01 27.495 2.497e+01
-115.000 90.000 -1.632e+01 -2.788e+01 3.591 -1.663e+01 93.047 1.125e+01
-114.000 90.000 -1.192e+01 -2.654e+01 349.195 -1.207e+01 160.822 3.150e+01
-113.000 90.000 -8.272e+00 -2.558e+01 325.741 -8.353e+00 187.624 2.083e+01
-112.000 90.000 -6.855e+00 -2.492e+01 300.224 -6.923e+00 206.653 1.801e+01
-111.000 90.000 -6.966e+00 -2.475e+01 277.471 -7.039e+00 224.428 1.971e+01
-110.000 90.000 -8.661e+00 -2.533e+01 259.322 -8.755e+00 242.831 2.769e+01
-109.000 90.000 -1.288e+01 -2.662e+01 245.844 -1.306e+01 268.819 2.205e+01
-108.000 90.000 -1.771e+01 -2.811e+01 235.271 -1.813e+01 345.314 1.063e+01
-107.000 90.000 -1.190e+01 -2.897e+01 222.376 -1.198e+01 46.107 4.000e+01
-106.000 90.000 -8.563e+00 -2.868e+01 202.371 -8.606e+00 66.307 2.329e+01
-105.000 90.000 -7.997e+00 -2.743e+01 177.981 -8.047e+00 81.066 1.945e+01
-104.000 90.000 -9.617e+00 -2.606e+01 154.120 -9.717e+00 98.253 1.805e+01
-103.000 90.000 -1.340e+01 -2.534e+01 131.310 -1.369e+01 126.867 3.444e+01
-102.000 90.000 -1.681e+01 -2.551e+01 107.246 -1.744e+01 192.634 8.110e+00
-101.000 90.000 -1.323e+01 -2.632e+01 78.836 -1.344e+01 252.873 3.298e+01
-100.000 90.000 -1.001e+01 -2.696e+01 45.120 -1.010e+01 278.753 1.881e+01
-99.000 90.000 -9.062e+00 -2.676e+01 11.593 -9.136e+00 294.205 1.785e+01
-98.000 90.000 -1.069e+01 -2.630e+01 343.591 -1.082e+01 307.268 2.020e+01
-97.000 90.000 -1.658e+01 -2.638e+01 319.143 -1.706e+01 332.181 2.317e+01
-96.000 90.000 -1.768e+01 -2.716e+01 292.771 -1.820e+01 81.887 1.556e+01
-95.000 90.000 -1.084e+01 -2.807e+01 259.084 -1.092e+01 109.146 2.327e+01
-94.000 90.000 -8.958e+00 -2.786e+01 220.040 -9.014e+00 116.131 1.911e+01
-93.000 90.000 -1.078e+01 -2.675e+01 185.089 -1.089e+01 120.893 1.682e+01
-92.000 90.000 -1.858e+01 -2.610e+01 154.604 -1.943e+01 137.438 1.885e+01
-91.000 90.000 -1.698e+01 -2.644e+01 122.062 -1.750e+01 273.113 1.607e+01
-90.000 90.000 -1.058e+01 -2.715e+01 80.964 -1.068e+01 283.554 2.495e+01
-89.000 90.000 -9.695e+00 -2.679e+01 33.876 -9.780e+00 285.127 1.750e+01
-88.000 90.000 -1.313e+01 -2.567e+01 351.826 -1.338e+01 287.740 1.331e+01
-87.000 90.000 -2.346e+01 -2.529e+01 313.942 -2.811e+01 350.573 1.016e+01
-86.000 90.000 -1.419e+01 -2.590e+01 272.043 -1.449e+01 81.423 2.668e+01
-85.000 90.000 -1.079e+01 -2.630e+01 221.059 -1.092e+01 83.557 1.893e+01
-84.000 90.000 -1.209e+01 -2.539e+01 169.998 -1.230e+01 83.884 1.312e+01
-83.000 90.000 -1.900e+01 -2.453e+01 125.920 -2.043e+01 98.932 1.343e+01
-82.000 90.000 -1.791e+01 -2.471e+01 82.188 -1.892e+01 220.148 1.058e+01
-81.000 90.000 -1.265e+01 -2.529e+01 31.121 -1.290e+01 229.127 2.304e+01
-80.000 90.000 -1.288e+01 -2.483e+01 336.496 -1.317e+01 228.807 1.215e+01
-79.000 90.000 -1.836e+01 -2.400e+01 288.345 -1.975e+01 240.291 8.429e+00
-78.000 90.000 -1.887e+01 -2.420e+01 243.212 -2.038e+01 350.639 4.718e+00
-77.000 90.000 -1.348e+01 -2.536e+01 191.969 -1.377e+01 2.293 2.765e+01
-76.000 90.000 -1.357e+01 -2.593e+01 132.609 -1.383e+01 358.926 1.518e+01
-75.000 90.000 -1.979e+01 -2.570e+01 76.442 -2.107e+01 3.459 5.382e+00
-74.000 90.000 -1.970e+01 -2.641e+01 22.458 -2.075e+01 130.013 6.360e+00
-73.000 90.000 -1.360e+01 -2.773e+01 316.528 -1.377e+01 131.356 3.520e+01
-72.000 90.000 -1.383e+01 -2.654e+01 243.556 -1.407e+01 121.940 1.401e+01
-71.000 90.000 -2.079e+01 -2.434e+01 184.546 -2.332e+01 116.952 3.640e+00
-70.000 90.000 -1.747e+01 -2.315e+01 131.172 -1.884e+01 263.443 8.520e+00
-69.000 90.000 -1.215e+01 -2.242e+01 76.250 -1.258e+01 250.868 3.125e+01
-68.000 90.000 -1.262e+01 -2.157e+01 22.279 -1.322e+01 231.849 1.543e+01
-67.000 90.000 -1.889e+01 -2.108e+01 332.431 -2.292e+01 189.696 9.684e+00
-66.000 90.000 -1.508e+01 -2.161e+01 284.574 -1.617e+01 38.937 6.775e+00
-65.000 90.000 -1.044e+01 -2.341e+01 234.153 -1.066e+01 9.006 1.597e+01
-64.000 90.000 -1.100e+01 -2.637e+01 175.348 -1.113e+01 338.592 2.628e+01
-63.000 90.000 -1.625e+01 -2.963e+01 101.623 -1.645e+01 274.621 3.186e+01
-62.000 90.000 -1.170e+01 -3.114e+01 10.893 -1.174e+01 176.025 3.130e+01
-61.000 90.000 -7.082e+00 -2.851e+01 281.385 -7.114e+00 137.605 2.601e+01
-60.000 90.000 -6.474e+00 -2.461e+01 215.708 -6.541e+00 109.162 1.845e+01
-59.000 90.000 -9.322e+00 -2.222e+01 164.551 -9.550e+00 78.064 1.269e+01
-58.000 90.000 -1.512e+01 -2.166e+01 117.717 -1.621e+01 19.546 5.603e+00
-57.000 90.000 -1.453e+01 -2.265e+01 69.513 -1.526e+01 297.150 1.078e+01
-56.000 90.000 -1.331e+01 -2.473e+01 18.453 -1.364e+01 279.904 1.121e+01
-55.000 90.000 -1.222e+01 -2.827e+01 330.187 -1.233e+01 296.716 2.126e+01
-54.000 90.000 -9.283e+00 -3.819e+01 307.175 -9.289e+00 301.957 4.000e+01
-53.000 90.000 -9.162e+00 -3.230e+01 35.505 -9.184e+00 286.789 2.359e+01
-52.000 90.000 -1.514e+01 -2.594e+01 2.579 -1.552e+01 244.812 1.167e+01
-51.000 90.000 -1.212e+01 -2.460e+01 317.514 -1.237e+01 109.645 1.924e+01
-50.000 90.000 -5.636e+00 -2.535e+01 257.122 -5.683e+00 70.301 3.826e+01
-49.000 90.000 -4.758e+00 -2.487e+01 183.899 -4.801e+00 40.106 2.470e+01
-48.000 90.000 -8.844e+00 -2.326e+01 119.840 -9.004e+00 1.775 1.541e+01
-47.000 90.000 -1.430e+01 -2.289e+01 62.436 -1.495e+01 245.511 3.464e+01
-46.000 90.000 -7.586e+00 -2.377e+01 0.841 -7.692e+00 175.050 3.621e+01
-45.000 90.000 -7.607e+00 -2.448e+01 292.020 -7.697e+00 137.264 2.433e+01
-44.000 90.000 -1.630e+01 -2.432e+01 225.571 -1.704e+01 68.049 1.694e+01
-43.000 90.000 -8.426e+00 -2.465e+01 168.088 -8.530e+00 290.911 1.770e+01
-42.000 90.000 -3.949e+00 -2.733e+01 118.142 -3.969e+00 251.696 2.617e+01
-41.000 90.000 -5.574e+00 -3.894e+01 71.564 -5.576e+00 212.616 3.740e+01
-40.000 90.000 -1.343e+01 -3.051e+01 216.183 -1.351e+01 113.982 1.721e+01
-39.000 90.000 -3.949e+00 -2.384e+01 177.634 -3.994e+00 10.214 3.317e+01
-38.000 90.000 -3.803e-02 -2.238e+01 139.790 -6.344e-02 324.471 4.000e+01
-37.000 90.000 9.969e-02 -2.426e+01 97.612 8.373e-02 271.782 4.000e+01
-36.000 90.000 7.475e-01 -2.858e+01 36.837 7.424e-01 198.507 3.938e+01
-35.000 90.000 4.486e+00 -2.958e+01 322.939 4.485e+00 136.902 4.000e+01
-34.000 90.000 6.995e+00 -2.977e+01 297.001 6.994e+00 95.531 4.000e+01
-33.000 90.000 7.085e+00 -2.745e+01 321.464 7.083e+00 62.728 3.470e+01
-32.000 90.000 4.170e+00 -2.150e+01 320.818 4.158e+00 35.058 2.599e+01
-31.000 90.000 -4.875e+00 -1.851e+01 302.322 -5.068e+00 23.472 1.355e+01
-30.000 90.000 -3.871e+00 -1.854e+01 281.103 -4.022e+00 124.369 2.284e+01
-29.000 90.000 1.663e+00 -2.207e+01 265.592 1.644e+00 105.085 3.328e+01
-28.000 90.000 1.237e+00 -2.914e+01 298.676 1.233e+00 67.894 3.260e+01
-27.000 90.000 -1.762e+00 -2.303e+01 338.118 -1.794e+00 359.261 3.015e+01
-26.000 90.000 1.380e+00 -1.976e+01 322.950 1.346e+00 276.969 2.400e+01
-25.000 90.000 4.717e+00 -2.007e+01 300.387 4.702e+00 230.307 2.531e+01
-24.000 90.000 5.208e+00 -2.343e+01 278.143 5.202e+00 192.434 2.866e+01
-23.000 90.000 3.376e+00 -3.007e+01 266.352 3.374e+00 149.402 3.445e+01
-22.000 90.000 1.151e+00 -3.374e+01 280.614 1.149e+00 88.511 4.000e+01
-21.000 90.000 2.291e+00 -2.902e+01 253.298 2.287e+00 24.956 3.384e+01
-20.000 90.000 4.168e+00 -2.400e+01 217.543 4.161e+00 341.127 2.975e+01
-19.000 90.000 4.948e+00 -2.160e+01 191.816 4.938e+00 306.864 2.740e+01
-18.000 90.000 4.968e+00 -2.238e+01 174.881 4.960e+00 274.996 2.748e+01
-17.000 90.000 4.749e+00 -2.675e+01 175.677 4.746e+00 242.762 3.222e+01
-16.000 90.000 4.656e+00 -2.927e+01 218.410 4.655e+00 208.855 4.000e+01
-15.000 90.000 5.005e+00 -2.662e+01 227.570 5.002e+00 173.101 3.341e+01
-14.000 90.000 5.986e+00 -2.734e+01 205.460 5.984e+00 138.414 3.404e+01
-13.000 90.000 7.225e+00 -3.080e+01 166.742 7.224e+00 108.899 3.947e+01
-12.000 90.000 8.116e+00 -3.805e+01 125.297 8.116e+00 85.329 4.000e+01
-11.000 90.000 8.426e+00 -3.951e+01 265.111 8.426e+00 65.938 4.000e+01
-10.000 90.000 8.357e+00 -2.968e+01 239.007 8.356e+00 48.592 4.000e+01
-9.000 90.000 8.352e+00 -2.800e+01 206.455 8.351e+00 31.922 4.000e+01
-8.000 90.000 8.708e+00 -2.841e+01 156.051 8.707e+00 16.130 4.000e+01
-7.000 90.000 9.242e+00 -2.653e+01 109.463 9.241e+00 2.264 3.617e+01
-6.000 90.000 9.501e+00 -2.586e+01 91.383 9.499e+00 350.640 3.552e+01
-5.000 90.000 9.199e+00 -2.753e+01 99.341 9.198e+00 340.860 3.785e+01
-4.000 90.000 8.417e+00 -2.734e+01 122.285 8.416e+00 332.654 4.000e+01
-3.000 90.000 7.601e+00 -2.538e+01 120.205 7.599e+00 326.337 4.000e+01
-2.000 90.000 7.298e+00 -2.373e+01 99.224 7.294e+00 322.405 3.433e+01
-1.000 90.000 7.604e+00 -2.272e+01 80.635 7.600e+00 320.516 3.159e+01
0.000 90.000 8.076e+00 -2.414e+01 73.217 8.074e+00 319.945 3.295e+01
1.000 90.000 8.290e+00 -3.052e+01 85.418 8.290e+00 320.974 4.000e+01
2.000 90.000 8.313e+00 -3.549e+01 190.308 8.313e+00 324.702 4.000e+01
3.000 90.000 8.709e+00 -3.047e+01 230.738 8.708e+00 331.391 3.933e+01
4.000 90.000 9.983e+00 -3.246e+01 258.313 9.983e+00 338.399 4.000e+01
5.000 90.000 1.188e+01 -4.019e+01 304.065 1.188e+01 342.943 4.000e+01
6.000 90.000 1.377e+01 -3.914e+01 125.652 1.377e+01 345.557 4.000e+01
7.000 90.000 1.521e+01 -2.815e+01 155.371 1.521e+01 348.352 4.000e+01
8.000 90.000 1.601e+01 -2.467e+01 166.157 1.601e+01 353.191 4.000e+01
9.000 90.000 1.608e+01 -2.576e+01 166.053 1.608e+01 1.464 4.000e+01
10.000 90.000 1.539e+01 -3.086e+01 137.518 1.539e+01 14.291 4.000e+01
11.000 90.000 1.396e+01 -3.065e+01 81.191 1.396e+01 32.752 4.000e+01
12.000 90.000 1.193e+01 -3.090e+01 74.419 1.193e+01 58.118 4.000e+01
13.000 90.000 9.659e+00 -3.760e+01 127.569 9.659e+00 91.596 4.000e+01
14.000 90.000 7.883e+00 -3.156e+01 197.596 7.882e+00 131.639 4.000e+01
15.000 90.000 6.897e+00 -2.924e+01 195.167 6.896e+00 171.499 4.000e+01
16.000 90.000 5.975e+00 -2.886e+01 165.976 5.974e+00 206.509 3.858e+01
17.000 90.000 4.424e+00 -2.750e+01 142.174 4.422e+00 238.574 3.197e+01
18.000 90.000 2.151e+00 -2.975e+01 132.495 2.148e+00 273.024 3.584e+01
19.000 90.000 -1.567e-01 -4.138e+01 57.862 -1.570e-01 316.979 4.000e+01
20.000 90.000 -7.094e-01 -2.921e+01 352.920 -7.155e-01 12.075 3.818e+01
21.000 90.000 1.088e+00 -2.738e+01 358.473 1.082e+00 65.735 2.916e+01
22.000 90.000 3.556e+00 -3.446e+01 8.208 3.556e+00 111.346 3.825e+01
23.000 90.000 5.474e+00 -3.365e+01 210.878 5.474e+00 151.499 4.000e+01
24.000 90.000 6.252e+00 -2.602e+01 227.768 6.249e+00 189.911 3.651e+01
25.000 90.000 5.595e+00 -2.525e+01 252.575 5.592e+00 231.194 3.961e+01
26.000 90.000 3.763e+00 -2.735e+01 289.208 3.760e+00 282.818 4.000e+01
27.000 90.000 2.891e+00 -2.955e+01 335.354 2.888e+00 348.694 4.000e+01
28.000 90.000 4.080e+00 -3.203e+01 5.899 4.078e+00 48.717 3.946e+01
29.000 90.000 4.498e+00 -3.855e+01 347.277 4.497e+00 95.903 4.000e+01
30.000 90.000 2.657e+00 -3.380e+01 279.636 2.656e+00 139.909 4.000e+01
31.000 90.000 -2.348e+00 -2.906e+01 272.777 -2.358e+00 196.004 2.693e+01
32.000 90.000 -5.274e+00 -2.792e+01 272.300 -5.298e+00 301.110 2.900e+01
33.000 90.000 -9.985e-01 -2.967e+01 268.738 -1.004e+00 12.333 2.891e+01
34.000 90.000 -5.093e-02 -3.458e+01 233.832 -5.246e-02 58.246 4.000e+01
35.000 90.000 -2.390e+00 -2.902e+01 177.980 -2.400e+00 104.500 2.699e+01
36.000 90.000 -7.190e+00 -2.359e+01 183.934 -7.291e+00 171.073 2.954e+01
37.000 90.000 -8.017e+00 -2.140e+01 207.711 -8.221e+00 258.663 1.554e+01
38.000 90.000 -8.409e+00 -2.112e+01 243.112 -8.648e+00 313.560 1.304e+01
39.000 90.000 -1.691e+01 -2.137e+01 288.565 -1.883e+01 358.801 4.009e+00
40.000 90.000 -1.107e+01 -2.126e+01 334.985 -1.150e+01 197.064 1.375e+01
41.000 90.000 -5.411e+00 -2.172e+01 13.173 -5.514e+00 230.158 2.076e+01
42.000 90.000 -5.717e+00 -2.412e+01 40.361 -5.780e+00 261.302 2.208e+01
43.000 90.000 -1.259e+01 -2.895e+01 44.616 -1.269e+01 298.338 1.663e+01
44.000 90.000 -1.568e+01 -2.958e+01 16.753 -1.586e+01 113.491 1.379e+01
45.000 90.000 -7.917e+00 -2.699e+01 25.425 -7.971e+00 157.502 2.166e+01
46.000 90.000 -7.721e+00 -2.767e+01 57.174 -7.765e+00 197.560 2.386e+01
47.000 90.000 -9.871e+00 -3.266e+01 113.205 -9.894e+00 257.188 2.741e+01
48.000 90.000 -8.233e+00 -3.259e+01 235.271 -8.249e+00 316.626 2.444e+01
49.000 90.000 -5.787e+00 -2.589e+01 298.141 -5.829e+00 337.791 2.401e+01
50.000 90.000 -2.915e+00 -2.306e+01 340.896 -2.957e+00 339.126 4.000e+01
51.000 90.000 4.970e-01 -2.276e+01 20.894 4.765e-01 347.208 2.838e+01
52.000 90.000 2.655e+00 -2.458e+01 62.802 2.647e+00 7.622 2.895e+01
53.000 90.000 3.134e+00 -2.852e+01 111.538 3.131e+00 37.801 3.200e+01
54.000 90.000 2.382e+00 -3.451e+01 174.746 2.381e+00 78.001 3.695e+01
55.000 90.000 1.469e+00 -4.291e+01 276.820 1.469e+00 126.989 4.000e+01
56.000 90.000 8.498e-01 -3.760e+01 58.906 8.491e-01 176.261 3.948e+01
57.000 90.000 -7.756e-01 -3.107e+01 124.874 -7.796e-01 221.285 3.035e+01
58.000 90.000 -5.134e+00 -2.758e+01 177.398 -5.158e+00 271.152 2.244e+01
59.000 90.000 -1.023e+01 -2.558e+01 225.294 -1.036e+01 7.840 1.971e+01
60.000 90.000 -5.652e+00 -2.481e+01 268.705 -5.705e+00 90.313 4.000e+01
61.000 90.000 -3.971e+00 -2.563e+01 308.447 -4.001e+00 137.097 3.814e+01
62.000 90.000 -5.394e+00 -2.865e+01 347.469 -5.415e+00 187.004 3.279e+01
63.000 90.000 -6.814e+00 -3.516e+01 31.897 -6.820e+00 255.385 3.159e+01
64.000 90.000 -5.309e+00 -5.137e+01 135.726 -5.309e+00 317.012 4.000e+01
65.000 90.000 -5.047e+00 -3.929e+01 291.422 -5.049e+00 359.593 3.489e+01
66.000 90.000 -8.253e+00 -3.319e+01 347.136 -8.267e+00 39.721 2.693e+01
67.000 90.000 -1.530e+01 -3.047e+01 30.946 -1.543e+01 119.821 1.504e+01
68.000 90.000 -1.068e+01 -3.069e+01 73.401 -1.072e+01 214.797 2.412e+01
69.000 90.000 -8.519e+00 -3.348e+01 130.276 -8.533e+00 254.992 2.666e+01
70.000 90.000 -1.111e+01 -3.397e+01 213.920 -1.113e+01 297.834 2.289e+01
71.000 90.000 -1.347e+01 -3.111e+01 279.130 -1.355e+01 24.539 1.790e+01
72.000 90.000 -8.501e+00 -2.968e+01 333.468 -8.534e+00 85.206 2.179e+01
73.000 90.000 -6.676e+00 -2.856e+01 30.296 -6.704e+00 115.062 2.190e+01
74.000 90.000 -8.479e+00 -2.685e+01 83.160 -8.543e+00 140.980 1.979e+01
75.000 90.000 -1.445e+01 -2.559e+01 128.550 -1.480e+01 184.928 1.262e+01
76.000 90.000 -1.443e+01 -2.537e+01 171.776 -1.479e+01 282.326 1.125e+01
77.000 90.000 -1.048e+01 -2.585e+01 217.922 -1.061e+01 315.675 1.533e+01
78.000 90.000 -1.081e+01 -2.625e+01 267.566 -1.094e+01 326.273 1.675e+01
79.000 90.000 -1.508e+01 -2.627e+01 316.315 -1.543e+01 319.742 3.600e+01
80.000 90.000 -1.988e+01 -2.645e+01 2.010 -2.096e+01 257.700 5.970e+00
81.000 90.000 -1.691e+01 -2.722e+01 47.723 -1.733e+01 207.232 1.976e+01
82.000 90.000 -1.661e+01 -2.821e+01 97.936 -1.692e+01 178.147 1.144e+01
83.000 90.000 -1.609e+01 -2.841e+01 151.280 -1.636e+01 132.870 2.254e+01
84.000 90.000 -1.324e+01 -2.791e+01 199.790 -1.339e+01 101.671 1.461e+01
85.000 90.000 -1.242e+01 -2.785e+01 243.331 -1.255e+01 87.282 2.335e+01
86.000 90.000 -1.537e+01 -2.848e+01 288.730 -1.558e+01 71.417 1.753e+01
87.000 90.000 -2.080e+01 -2.872e+01 339.426 -2.156e+01 359.304 1.792e+01
88.000 90.000 -1.387e+01 -2.788e+01 27.140 -1.404e+01 299.882 1.384e+01
89.000 90.000 -1.060e+01 -2.718e+01 67.201 -1.069e+01 287.535 2.038e+01
90.000 90.000 -1.111e+01 -2.743e+01 105.476 -1.121e+01 278.985 3.535e+01
91.000 90.000 -1.586e+01 -2.814e+01 148.621 -1.613e+01 259.487 1.267e+01
92.000 90.000 -1.906e+01 -2.806e+01 195.030 -1.964e+01 164.730 1.527e+01
93.000 90.000 -1.213e+01 -2.733e+01 235.462 -1.226e+01 125.048 1.567e+01
94.000 90.000 -9.759e+00 -2.722e+01 269.605 -9.838e+00 112.622 2.567e+01
95.000 90.000 -1.065e+01 -2.813e+01 303.427 -1.073e+01 100.739 2.581e+01
96.000 90.000 -1.502e+01 -2.948e+01 342.074 -1.518e+01 76.379 1.433e+01
97.000 90.000 -1.814e+01 -3.007e+01 22.829 -1.843e+01 354.721 1.864e+01
98.000 90.000 -1.224e+01 -3.002e+01 55.942 -1.232e+01 306.764 1.822e+01
99.000 90.000 -9.452e+00 -3.040e+01 79.425 -9.487e+00 288.541 2.723e+01
100.000 90.000 -9.336e+00 -3.150e+01 97.114 -9.362e+00 273.974 4.000e+01
101.000 90.000 -1.185e+01 -3.279e+01 114.643 -1.188e+01 255.422 2.493e+01
102.000 90.000 -1.753e+01 -3.335e+01 138.400 -1.765e+01 208.892 1.624e+01
103.000 90.000 -1.455e+01 -3.244e+01 167.722 -1.462e+01 124.503 2.118e+01
104.000 90.000 -9.523e+00 -3.078e+01 195.053 -9.556e+00 96.909 2.131e+01
105.000 90.000 -7.761e+00 -2.971e+01 218.139 -7.789e+00 82.611 2.504e+01
106.000 90.000 -8.591e+00 -2.988e+01 238.200 -8.624e+00 68.884 3.596e+01
107.000 90.000 -1.227e+01 -3.139e+01 255.247 -1.232e+01 45.947 2.536e+01
108.000 90.000 -1.678e+01 -3.351e+01 266.627 -1.687e+01 341.564 1.696e+01
109.000 90.000 -1.267e+01 -3.381e+01 272.733 -1.270e+01 278.402 4.000e+01
110.000 90.000 -9.459e+00 -3.108e+01 286.343 -9.489e+00 249.201 2.601e+01
111.000 90.000 -7.979e+00 -2.760e+01 308.627 -8.026e+00 224.931 1.963e+01
112.000 90.000 -7.357e+00 -2.501e+01 333.755 -7.433e+00 202.219 2.016e+01
113.000 90.000 -7.823e+00 -2.382e+01 0.304 -7.933e+00 181.938 4.000e+01
114.000 90.000 -1.033e+01 -2.416e+01 29.180 -1.051e+01 159.782 1.621e+01
115.000 90.000 -1.546e+01 -2.610e+01 62.115 -1.586e+01 111.414 1.301e+01
116.000 90.000 -1.321e+01 -2.979e+01 100.722 -1.330e+01 30.560 1.704e+01
117.000 90.000 -8.698e+00 -3.696e+01 146.718 -8.705e+00 357.703 3.404e+01
118.000 90.000 -6.584e+00 -4.286e+01 330.174 -6.585e+00 334.994 4.000e+01
119.000 90.000 -5.605e+00 -3.074e+01 19.696 -5.618e+00 312.570 2.584e+01
120.000 90.000 -5.311e+00 -2.658e+01 49.094 -5.344e+00 291.033 2.234e+01
121.000 90.000 -6.056e+00 -2.548e+01 72.099 -6.106e+00 269.970 2.972e+01
122.000 90.000 -8.136e+00 -2.655e+01 87.852 -8.199e+00 243.690 2.621e+01
123.000 90.000 -1.057e+01 -2.872e+01 91.654 -1.063e+01 203.812 1.878e+01
124.000 90.000 -1.144e+01 -2.949e+01 88.320 -1.151e+01 155.827 1.869e+01
125.000 90.000 -1.132e+01 -2.904e+01 98.923 -1.139e+01 105.749 3.629e+01
126.000 90.000 -8.860e+00 -2.968e+01 124.968 -8.896e+00 55.437 2.136e+01
127.000 90.000 -5.339e+00 -3.271e+01 162.061 -5.347e+00 23.035 3.104e+01
128.000 90.000 -3.086e+00 -4.023e+01 230.895 -3.087e+00 1.145 3.949e+01
129.000 90.000 -2.015e+00 -3.657e+01 350.982 -2.017e+00 339.975 4.000e+01
130.000 90.000 -1.371e+00 -3.255e+01 34.854 -1.374e+00 316.669 3.136e+01
131.000 90.000 -7.785e-01 -3.509e+01 60.953 -7.801e-01 293.403 3.632e+01
132.000 90.000 -4.641e-01 -4.304e+01 323.195 -4.644e-01 271.198 4.000e+01
133.000 90.000 -4.690e-01 -2.910e+01 316.758 -4.750e-01 248.235 2.925e+01
134.000 90.000 -5.078e-01 -2.502e+01 338.310 -5.232e-01 224.321 2.529e+01
135.000 90.000 -6.329e-01 -2.495e+01 359.334 -6.491e-01 201.180 3.291e+01
136.000 90.000 -1.128e+00 -2.899e+01 11.707 -1.135e+00 177.718 4.000e+01
137.000 90.000 -1.700e+00 -3.561e+01 319.239 -1.702e+00 151.382 4.000e+01
138.000 90.000 -1.834e+00 -2.849e+01 287.977 -1.843e+00 124.695 3.749e+01
139.000 90.000 -2.017e+00 -2.635e+01 298.196 -2.033e+00 101.440 3.515e+01
140.000 90.000 -2.898e+00 -2.819e+01 305.605 -2.910e+00 78.470 2.799e+01
141.000 90.000 -4.070e+00 -3.207e+01 289.329 -4.077e+00 50.711 2.937e+01
142.000 90.000 -4.661e+00 -3.244e+01 265.084 -4.668e+00 20.569 2.866e+01
143.000 90.000 -5.087e+00 -3.599e+01 270.451 -5.091e+00 353.084 3.098e+01
144.000 90.000 -5.847e+00 -4.022e+01 100.266 -5.848e+00 325.397 3.736e+01
145.000 90.000 -6.434e+00 -2.799e+01 123.463 -6.465e+00 296.190 3.953e+01
146.000 90.000 -7.001e+00 -2.534e+01 145.408 -7.065e+00 269.269 1.993e+01
147.000 90.000 -8.304e+00 -2.778e+01 167.475 -8.353e+00 242.083 1.976e+01
148.000 90.000 -9.743e+00 -4.277e+01 181.617 -9.745e+00 209.101 3.974e+01
149.000 90.000 -1.040e+01 -3.210e+01 41.556 -1.043e+01 176.120 2.465e+01
150.000 90.000 -1.150e+01 -2.932e+01 70.984 -1.157e+01 146.125 1.806e+01
151.000 90.000 -1.297e+01 -3.331e+01 128.670 -1.301e+01 110.105 3.031e+01
152.000 90.000 -1.317e+01 -3.088e+01 227.404 -1.324e+01 75.937 2.418e+01
153.000 90.000 -1.429e+01 -2.743e+01 271.305 -1.451e+01 53.664 1.749e+01
154.000 90.000 -1.866e+01 -2.926e+01 303.575 -1.905e+01 26.739 1.028e+01
155.000 90.000 -2.288e+01 -3.718e+01 348.801 -2.305e+01 329.547 2.406e+01
156.000 90.000 -2.559e+01 -4.572e+01 78.151 -2.563e+01 305.352 2.282e+01
157.000 90.000 -2.794e+01 -3.903e+01 346.415 -2.830e+01 65.586 1.092e+01
158.000 90.000 -1.731e+01 -2.777e+01 1.154 -1.772e+01 79.400 1.027e+01
159.000 90.000 -1.498e+01 -2.430e+01 21.996 -1.552e+01 62.967 1.312e+01
160.000 90.000 -1.406e+01 -2.571e+01 47.091 -1.437e+01 21.446 1.912e+01
161.000 90.000 -1.077e+01 -3.251e+01 99.671 -1.080e+01 345.658 2.251e+01
162.000 90.000 -8.650e+00 -3.145e+01 195.882 -8.673e+00 323.712 2.484e+01
163.000 90.000 -8.241e+00 -3.094e+01 222.406 -8.264e+00 299.707 2.289e+01
164.000 90.000 -7.859e+00 -3.812e+01 185.196 -7.863e+00 272.151 3.027e+01
165.000 90.000 -7.463e+00 -3.154e+01 134.720 -7.480e+00 251.944 2.509e+01
166.000 90.000 -8.511e+00 -3.045e+01 162.590 -8.539e+00 239.460 2.214e+01
167.000 90.000 -1.088e+01 -2.964e+01 233.203 -1.093e+01 227.853 3.943e+01
168.000 90.000 -1.182e+01 -2.559e+01 278.072 -1.200e+01 216.909 1.483e+01
169.000 90.000 -9.776e+00 -2.605e+01 300.369 -9.880e+00 216.862 1.623e+01
170.000 90.000 -7.043e+00 -3.511e+01 317.898 -7.049e+00 220.584 2.813e+01
171.000 90.000 -5.668e+00 -3.457e+01 149.416 -5.673e+00 219.398 2.944e+01
172.000 90.000 -6.076e+00 -3.047e+01 169.508 -6.091e+00 209.912 2.817e+01
173.000 90.000 -7.289e+00 -3.577e+01 217.277 -7.295e+00 191.322 3.566e+01
174.000 90.000 -8.089e+00 -3.438e+01 311.809 -8.099e+00 174.352 2.969e+01
175.000 90.000 -9.169e+00 -3.540e+01 348.364 -9.179e+00 172.325 4.000e+01
176.000 90.000 -1.038e+01 -3.988e+01 131.183 -1.038e+01 184.385 3.143e+01
177.000 90.000 -1.050e+01 -3.012e+01 171.130 -1.055e+01 191.482 2.883e+01
178.000 90.000 -9.763e+00 -3.081e+01 199.022 -9.797e+00 178.737 3.027e+01
179.000 90.000 -7.987e+00 -3.359e+01 279.762 -7.999e+00 160.510 2.678e+01
