# Supplementary material
Source: publisher figshare collection journal article supplement (https://frontiersin.figshare.com/ndownloader/files/24979811)
Supplement: Supplementary file 1 [file 24979811 › datasheet/simulation of phaseshifter/amplitude.csv]

Frequency / GHz SZmax(2)	Zmax(2) (a=2.51)/abs	dB
----------------------------------------------------------------------
90 -0.13631394
90.05 -0.13663554
90.1 -0.13695933
90.15 -0.13728533
90.2 -0.13761356
90.25 -0.13794403
90.3 -0.13827676
90.35 -0.13861176
90.4 -0.13894907
90.45 -0.13928869
90.5 -0.13963064
90.55 -0.13997494
90.6 -0.14032161
90.65 -0.14067067
90.7 -0.14102215
90.75 -0.14137605
90.8 -0.1417324
90.85 -0.14209121
90.9 -0.14245252
90.95 -0.14281633
91 -0.14318268
91.05 -0.14355158
91.1 -0.14392305
91.15 -0.14429711
91.2 -0.14467379
91.25 -0.1450531
91.3 -0.14543508
91.35 -0.14581974
91.4 -0.1462071
91.45 -0.1465972
91.5 -0.14699004
91.55 -0.14738566
91.6 -0.14778408
91.65 -0.14818532
91.7 -0.14858941
91.75 -0.14899638
91.8 -0.14940624
91.85 -0.14981902
91.9 -0.15023475
91.95 -0.15065346
92 -0.15107517
92.05 -0.15149991
92.1 -0.1519277
92.15 -0.15235858
92.2 -0.15279256
92.25 -0.15322968
92.3 -0.15366997
92.35 -0.15411345
92.4 -0.15456016
92.45 -0.15501012
92.5 -0.15546336
92.55 -0.15591991
92.6 -0.15637981
92.65 -0.15684308
92.7 -0.15730975
92.75 -0.15777987
92.8 -0.15825345
92.85 -0.15873053
92.9 -0.15921114
92.95 -0.15969532
93 -0.1601831
93.05 -0.16067452
93.1 -0.1611696
93.15 -0.16166839
93.2 -0.16217091
93.25 -0.16267721
93.3 -0.16318733
93.35 -0.16370128
93.4 -0.16421913
93.45 -0.16474089
93.5 -0.16526661
93.55 -0.16579634
93.6 -0.1663301
93.65 -0.16686793
93.7 -0.16740989
93.75 -0.167956
93.8 -0.16850631
93.85 -0.16906086
93.9 -0.16961969
93.95 -0.17018285
94 -0.17075038
94.05 -0.17132232
94.1 -0.17189871
94.15 -0.17247961
94.2 -0.17306505
94.25 -0.17365509
94.3 -0.17424976
94.35 -0.17484912
94.4 -0.17545322
94.45 -0.17606211
94.5 -0.17667582
94.55 -0.17729442
94.6 -0.17791795
94.65 -0.17854647
94.7 -0.17918003
94.75 -0.17981867
94.8 -0.18046246
94.85 -0.18111145
94.9 -0.18176568
94.95 -0.18242523
95 -0.18309014
95.05 -0.18376047
95.1 -0.18443628
95.15 -0.18511763
95.2 -0.18580458
95.25 -0.18649719
95.3 -0.18719551
95.35 -0.18789962
95.4 -0.18860957
95.45 -0.18932543
95.5 -0.19004726
95.55 -0.19077514
95.6 -0.19150911
95.65 -0.19224926
95.7 -0.19299566
95.75 -0.19374836
95.8 -0.19450745
95.85 -0.19527298
95.9 -0.19604505
95.95 -0.19682371
96 -0.19760905
96.05 -0.19840113
96.1 -0.19920004
96.15 -0.20000586
96.2 -0.20081866
96.25 -0.20163853
96.3 -0.20246553
96.35 -0.20329977
96.4 -0.20414132
96.45 -0.20499027
96.5 -0.20584669
96.55 -0.20671069
96.6 -0.20758235
96.65 -0.20846176
96.7 -0.20934902
96.75 -0.2102442
96.8 -0.21114742
96.85 -0.21205877
96.9 -0.21297833
96.95 -0.21390622
97 -0.21484253
97.05 -0.21578737
97.1 -0.21674083
97.15 -0.21770303
97.2 -0.21867407
97.25 -0.21965406
97.3 -0.22064311
97.35 -0.22164133
97.4 -0.22264883
97.45 -0.22366573
97.5 -0.22469216
97.55 -0.22572822
97.6 -0.22677403
97.65 -0.22782974
97.7 -0.22889544
97.75 -0.22997128
97.8 -0.23105739
97.85 -0.23215389
97.9 -0.23326092
97.95 -0.23437861
98 -0.2355071
98.05 -0.23664654
98.1 -0.23779706
98.15 -0.23895881
98.2 -0.24013193
98.25 -0.24131658
98.3 -0.24251292
98.35 -0.24372108
98.4 -0.24494124
98.45 -0.24617354
98.5 -0.24741817
98.55 -0.24867527
98.6 -0.24994502
98.65 -0.25122759
98.7 -0.25252315
98.75 -0.25383189
98.8 -0.25515398
98.85 -0.2564896
98.9 -0.25783895
98.95 -0.25920221
99 -0.26057957
99.05 -0.26197124
99.1 -0.26337742
99.15 -0.2647983
99.2 -0.2662341
99.25 -0.26768502
99.3 -0.26915129
99.35 -0.27063312
99.4 -0.27213073
99.45 -0.27364436
99.5 -0.27517423
99.55 -0.27672058
99.6 -0.27828365
99.65 -0.27986368
99.7 -0.28146092
99.75 -0.28307563
99.8 -0.28470807
99.85 -0.28635849
99.9 -0.28802717
99.95 -0.28971438
100 -0.2914204
100.05 -0.29314551
100.1 -0.29489001
100.15 -0.29665417
100.2 -0.29843832
100.25 -0.30024275
100.3 -0.30206777
100.35 -0.30391371
100.4 -0.30578089
100.45 -0.30766964
100.5 -0.3095803
100.55 -0.31151321
100.6 -0.31346873
100.65 -0.3154472
100.7 -0.31744901
100.75 -0.31947452
100.8 -0.32152411
100.85 -0.32359816
100.9 -0.32569709
100.95 -0.32782128
101 -0.32997116
101.05 -0.33214715
101.1 -0.33434967
101.15 -0.33657916
101.2 -0.33883608
101.25 -0.34112087
101.3 -0.34343401
101.35 -0.34577598
101.4 -0.34814726
101.45 -0.35054834
101.5 -0.35297975
101.55 -0.35544199
101.6 -0.35793561
101.65 -0.36046113
101.7 -0.36301912
101.75 -0.36561014
101.8 -0.36823477
101.85 -0.3708936
101.9 -0.37358725
101.95 -0.37631631
102 -0.37908144
102.05 -0.38188326
102.1 -0.38472246
102.15 -0.38759969
102.2 -0.39051566
102.25 -0.39347107
102.3 -0.39646665
102.35 -0.39950313
102.4 -0.40258127
102.45 -0.40570186
102.5 -0.40886567
102.55 -0.41207353
102.6 -0.41532626
102.65 -0.41862473
102.7 -0.42196979
102.75 -0.42536234
102.8 -0.4288033
102.85 -0.4322936
102.9 -0.4358342
102.95 -0.43942609
103 -0.44307026
103.05 -0.44676776
103.1 -0.45051964
103.15 -0.45432697
103.2 -0.45819088
103.25 -0.4621125
103.3 -0.466093
103.35 -0.47013357
103.4 -0.47423543
103.45 -0.47839986
103.5 -0.48262814
103.55 -0.48692159
103.6 -0.49128157
103.65 -0.49570948
103.7 -0.50020674
103.75 -0.50477483
103.8 -0.50941525
103.85 -0.51412955
103.9 -0.51891931
103.95 -0.52378618
104 -0.52873181
104.05 -0.53375794
104.1 -0.53886632
104.15 -0.54405879
104.2 -0.54933719
104.25 -0.55470345
104.3 -0.56015954
104.35 -0.56570748
104.4 -0.57134936
104.45 -0.57708731
104.5 -0.58292355
104.55 -0.58886032
104.6 -0.59489996
104.65 -0.60104487
104.7 -0.60729751
104.75 -0.61366042
104.8 -0.62013621
104.85 -0.62672756
104.9 -0.63343724
104.95 -0.64026809
105 -0.64722306
105.05 -0.65430516
105.1 -0.66151751
105.15 -0.6688633
105.2 -0.67634584
105.25 -0.68396853
105.3 -0.69173488
105.35 -0.6996485
105.4 -0.70771313
105.45 -0.71593261
105.5 -0.72431089
105.55 -0.73285206
105.6 -0.74156035
105.65 -0.75044011
105.7 -0.75949581
105.75 -0.7687321
105.8 -0.77815376
105.85 -0.78776572
105.9 -0.79757308
105.95 -0.80758111
106 -0.81779523
106.05 -0.82822108
106.1 -0.83886444
106.15 -0.84973132
106.2 -0.8608279
106.25 -0.8721606
106.3 -0.88373603
106.35 -0.89556103
106.4 -0.90764269
106.45 -0.91998831
106.5 -0.93260549
106.55 -0.94550204
106.6 -0.95868606
106.65 -0.97216596
106.7 -0.9859504
106.75 -1.0000484
106.8 -1.0144692
106.85 -1.0292225
106.9 -1.0443182
106.95 -1.0597666
107 -1.0755786
107.05 -1.0917651
107.1 -1.1083376
107.15 -1.1253081
107.2 -1.1426889
107.25 -1.1604927
107.3 -1.1787328
107.35 -1.1974229
107.4 -1.2165774
107.45 -1.2362109
107.5 -1.2563388
107.55 -1.276977
107.6 -1.2981419
107.65 -1.3198507
107.7 -1.342121
107.75 -1.3649713
107.8 -1.3884206
107.85 -1.4124887
107.9 -1.4371962
107.95 -1.4625643
108 -1.4886153
108.05 -1.5153719
108.1 -1.5428581
108.15 -1.5710984
108.2 -1.6001186
108.25 -1.6299451
108.3 -1.6606055
108.35 -1.6921285
108.4 -1.7245435
108.45 -1.7578814
108.5 -1.7921739
108.55 -1.8274542
108.6 -1.8637562
108.65 -1.9011155
108.7 -1.9395686
108.75 -1.9791536
108.8 -2.0199096
108.85 -2.0618773
108.9 -2.1050984
108.95 -2.1496164
109 -2.1954759
109.05 -2.2427229
109.1 -2.291405
109.15 -2.341571
109.2 -2.393271
109.25 -2.4465568
109.3 -2.5014811
109.35 -2.5580981
109.4 -2.6164632
109.45 -2.6766329
109.5 -2.7386645
109.55 -2.8026164
109.6 -2.8685476
109.65 -2.9365177
109.7 -3.0065865
109.75 -3.0788139
109.8 -3.1532595
109.85 -3.229982
109.9 -3.3090395
109.95 -3.3904879
110 -3.4743814
110.05 -3.5607711
110.1 -3.6497047
110.15 -3.7412252
110.2 -3.8353703
110.25 -3.9321711
110.3 -4.031651
110.35 -4.1338238
110.4 -4.2386927
110.45 -4.3462482
110.5 -4.4564661
110.55 -4.5693052
110.6 -4.6847052
110.65 -4.8025836
110.7 -4.922833
110.75 -5.0453179
110.8 -5.1698714
110.85 -5.2962916
110.9 -5.4243378
110.95 -5.5537269
111 -5.6841294
111.05 -5.815166
111.1 -5.9464042
111.15 -6.0773553
111.2 -6.2074723
111.25 -6.3361488
111.3 -6.4627191
111.35 -6.5864598
111.4 -6.7065937
111.45 -6.8222956
111.5 -6.9327013
111.55 -7.0369185
111.6 -7.1340417
111.65 -7.2231686
111.7 -7.3034202
111.75 -7.3739618
111.8 -7.4340256
111.85 -7.4829333
111.9 -7.5201174
111.95 -7.54514
112 -7.5577081
112.05 -7.5576844
112.1 -7.545092
112.15 -7.520114
112.2 -7.4830864
112.25 -7.4344868
112.3 -7.3749177
112.35 -7.3050871
112.4 -7.2257864
112.45 -7.1378678
112.5 -7.0422223
112.55 -6.9397585
112.6 -6.8313834
112.65 -6.7179868
112.7 -6.6004267
112.75 -6.4795196
112.8 -6.3560319
112.85 -6.2306749
112.9 -6.1041014
112.95 -5.9769044
113 -5.8496177
113.05 -5.7227168
113.1 -5.5966217
113.15 -5.4717001
113.2 -5.34827
113.25 -5.2266045
113.3 -5.1069348
113.35 -4.9894543
113.4 -4.874322
113.45 -4.7616665
113.5 -4.6515891
113.55 -4.5441666
113.6 -4.4394546
113.65 -4.33749
113.7 -4.2382932
113.75 -4.1418707
113.8 -4.0482165
113.85 -3.9573144
113.9 -3.8691393
113.95 -3.7836583
114 -3.7008326
114.05 -3.6206182
114.1 -3.5429666
114.15 -3.4678263
114.2 -3.395143
114.25 -3.3248604
114.3 -3.2569209
114.35 -3.1912658
114.4 -3.1278362
114.45 -3.0665727
114.5 -3.0074163
114.55 -2.9503081
114.6 -2.8951903
114.65 -2.8420055
114.7 -2.7906976
114.75 -2.7412113
114.8 -2.6934928
114.85 -2.6474893
114.9 -2.6031496
114.95 -2.5604237
115 -2.5192633
115.05 -2.4796212
115.1 -2.4414519
115.15 -2.4047115
115.2 -2.3693572
115.25 -2.335348
115.3 -2.3026442
115.35 -2.2712075
115.4 -2.2410011
115.45 -2.2119896
115.5 -2.1841388
115.55 -2.1574161
115.6 -2.1317899
115.65 -2.1072301
115.7 -2.0837077
115.75 -2.0611951
115.8 -2.0396655
115.85 -2.0190937
115.9 -1.9994554
115.95 -1.9807272
116 -1.962887
116.05 -1.9459136
116.1 -1.9297869
116.15 -1.9144878
116.2 -1.8999978
116.25 -1.8862996
116.3 -1.8733768
116.35 -1.8612137
116.4 -1.8497955
116.45 -1.8391083
116.5 -1.8291387
116.55 -1.8198745
116.6 -1.8113038
116.65 -1.8034157
116.7 -1.7961999
116.75 -1.7896468
116.8 -1.7837476
116.85 -1.778494
116.9 -1.7738783
116.95 -1.7698937
117 -1.7665336
117.05 -1.7637924
117.1 -1.7616648
117.15 -1.7601464
117.2 -1.7592329
117.25 -1.7589211
117.3 -1.7592079
117.35 -1.7600909
117.4 -1.7615685
117.45 -1.7636392
117.5 -1.7663024
117.55 -1.7695576
117.6 -1.7734053
117.65 -1.7778462
117.7 -1.7828815
117.75 -1.7885132
117.8 -1.7947434
117.85 -1.8015751
117.9 -1.8090114
117.95 -1.8170563
118 -1.825714
118.05 -1.8349894
118.1 -1.8448878
118.15 -1.8554151
118.2 -1.8665775
118.25 -1.8783819
118.3 -1.8908357
118.35 -1.9039467
118.4 -1.9177234
118.45 -1.9321745
118.5 -1.9473096
118.55 -1.9631386
118.6 -1.979672
118.65 -1.9969207
118.7 -2.0148962
118.75 -2.0336107
118.8 -2.0530766
118.85 -2.0733073
118.9 -2.0943161
118.95 -2.1161175
119 -2.1387261
119.05 -2.1621571
119.1 -2.1864264
119.15 -2.2115502
119.2 -2.2375454
119.25 -2.2644293
119.3 -2.2922198
119.35 -2.3209352
119.4 -2.3505942
119.45 -2.3812162
119.5 -2.4128209
119.55 -2.4454283
119.6 -2.479059
119.65 -2.5137338
119.7 -2.5494738
119.75 -2.5863006
119.8 -2.6242358
119.85 -2.6633013
119.9 -2.7035189
119.95 -2.7449108
120 -2.7874987
120.05 -2.8313047
120.1 -2.8763502
120.15 -2.9226564
120.2 -2.9702443
120.25 -3.019134
120.3 -3.0693448
120.35 -3.1208954
120.4 -3.1738031
120.45 -3.2280841
120.5 -3.2837527
120.55 -3.3408218
120.6 -3.3993021
120.65 -3.4592019
120.7 -3.5205267
120.75 -3.5832791
120.8 -3.6474583
120.85 -3.7130595
120.9 -3.7800737
120.95 -3.8484871
121 -3.9182805
121.05 -3.9894289
121.1 -4.0619008
121.15 -4.1356576
121.2 -4.210653
121.25 -4.2868322
121.3 -4.3641312
121.35 -4.442476
121.4 -4.5217821
121.45 -4.6019534
121.5 -4.6828815
121.55 -4.7644451
121.6 -4.8465091
121.65 -4.928924
121.7 -5.0115253
121.75 -5.0941328
121.8 -5.1765505
121.85 -5.2585658
121.9 -5.3399501
121.95 -5.4204585
122 -5.4998302
122.05 -5.5777894
122.1 -5.6540459
122.15 -5.7282969
122.2 -5.8002284
122.25 -5.8695176
122.3 -5.9358352
122.35 -5.9988486
122.4 -6.0582249
122.45 -6.1136351
122.5 -6.1647579
122.55 -6.2112837
122.6 -6.2529196
122.65 -6.2893934
122.7 -6.3204581
122.75 -6.3458962
122.8 -6.3655233
122.85 -6.3791918
122.9 -6.3867932
122.95 -6.3882606
123 -6.3835697
123.05 -6.3727396
123.1 -6.3558318
123.15 -6.33295
123.2 -6.3042369
123.25 -6.2698725
123.3 -6.2300704
123.35 -6.1850739
123.4 -6.1351522
123.45 -6.0805954
123.5 -6.0217111
123.55 -5.9588188
123.6 -5.8922464
123.65 -5.8223259
123.7 -5.7493894
123.75 -5.6737662
123.8 -5.5957794
123.85 -5.5157432
123.9 -5.4339612
123.95 -5.3507243
124 -5.2663091
124.05 -5.1809774
124.1 -5.0949751
124.15 -5.0085318
124.2 -4.921861
124.25 -4.8351596
124.3 -4.7486085
124.35 -4.6623732
124.4 -4.5766038
124.45 -4.4914358
124.5 -4.4069912
124.55 -4.3233785
124.6 -4.240694
124.65 -4.1590226
124.7 -4.078438
124.75 -3.9990042
124.8 -3.9207757
124.85 -3.8437986
124.9 -3.768111
124.95 -3.6937437
125 -3.6207213
125.05 -3.5490621
125.1 -3.4787791
125.15 -3.4098805
125.2 -3.3423699
125.25 -3.2762473
125.3 -3.2115089
125.35 -3.1481478
125.4 -3.0861545
125.45 -3.025517
125.5 -2.9662211
125.55 -2.9082509
125.6 -2.8515886
125.65 -2.7962153
125.7 -2.7421109
125.75 -2.6892543
125.8 -2.6376234
125.85 -2.5871956
125.9 -2.537948
125.95 -2.4898568
126 -2.4428984
126.05 -2.3970487
126.1 -2.3522838
126.15 -2.3085794
126.2 -2.2659115
126.25 -2.2242563
126.3 -2.1835899
126.35 -2.1438889
126.4 -2.1051298
126.45 -2.0672898
126.5 -2.0303462
126.55 -1.9942766
126.6 -1.959059
126.65 -1.924672
126.7 -1.8910942
126.75 -1.8583051
126.8 -1.8262843
126.85 -1.7950117
126.9 -1.7644681
126.95 -1.7346344
127 -1.7054919
127.05 -1.6770226
127.1 -1.6492088
127.15 -1.6220331
127.2 -1.5954787
127.25 -1.5695292
127.3 -1.5441687
127.35 -1.5193815
127.4 -1.4951525
127.45 -1.471467
127.5 -1.4483105
127.55 -1.4256691
127.6 -1.4035292
127.65 -1.3818775
127.7 -1.3607013
127.75 -1.339988
127.8 -1.3197255
127.85 -1.299902
127.9 -1.2805059
127.95 -1.2615261
128 -1.2429519
128.05 -1.2247726
128.1 -1.206978
128.15 -1.1895581
128.2 -1.1725034
128.25 -1.1558044
128.3 -1.139452
128.35 -1.1234374
128.4 -1.1077519
128.45 -1.0923871
128.5 -1.0773351
128.55 -1.0625878
128.6 -1.0481376
128.65 -1.0339771
128.7 -1.020099
128.75 -1.0064963
128.8 -0.99316218
128.85 -0.98008999
128.9 -0.96727329
128.95 -0.9547058
129 -0.94238144
129.05 -0.9302943
129.1 -0.91843862
129.15 -0.90680881
129.2 -0.89539944
129.25 -0.88420523
129.3 -0.87322103
129.35 -0.86244187
129.4 -0.85186289
129.45 -0.84147936
129.5 -0.8312867
129.55 -0.82128045
129.6 -0.81145626
129.65 -0.80180991
129.7 -0.7923373
129.75 -0.78303442
129.8 -0.7738974
129.85 -0.76492245
129.9 -0.75610589
129.95 -0.74744414
130 -0.73893371
130.05 -0.73057121
130.1 -0.72235334
130.15 -0.71427688
130.2 -0.70633871
130.25 -0.69853577
130.3 -0.6908651
130.35 -0.68332381
130.4 -0.67590908
130.45 -0.66861818
130.5 -0.66144842
130.55 -0.65439722
130.6 -0.64746203
130.65 -0.64064039
130.7 -0.63392989
130.75 -0.62732818
130.8 -0.62083297
130.85 -0.61444204
130.9 -0.60815322
130.95 -0.60196439
131 -0.59587347
131.05 -0.58987847
131.1 -0.5839774
131.15 -0.57816837
131.2 -0.5724495
131.25 -0.56681896
131.3 -0.56127498
131.35 -0.55581583
131.4 -0.55043981
131.45 -0.54514527
131.5 -0.5399306
131.55 -0.53479423
131.6 -0.52973461
131.65 -0.52475025
131.7 -0.51983969
131.75 -0.51500149
131.8 -0.51023426
131.85 -0.50553664
131.9 -0.5009073
131.95 -0.49634494
132 -0.49184828
132.05 -0.48741608
132.1 -0.48304714
132.15 -0.47874027
132.2 -0.47449431
132.25 -0.47030813
132.3 -0.46618063
132.35 -0.46211072
132.4 -0.45809735
132.45 -0.45413948
132.5 -0.45023612
132.55 -0.44638626
132.6 -0.44258894
132.65 -0.43884323
132.7 -0.43514819
132.75 -0.43150293
132.8 -0.42790656
132.85 -0.42435821
132.9 -0.42085705
132.95 -0.41740225
133 -0.41399298
133.05 -0.41062848
133.1 -0.40730795
133.15 -0.40403064
133.2 -0.4007958
133.25 -0.39760272
133.3 -0.39445068
133.35 -0.39133898
133.4 -0.38826694
133.45 -0.38523389
133.5 -0.38223919
133.55 -0.37928218
133.6 -0.37636224
133.65 -0.37347875
133.7 -0.37063112
133.75 -0.36781876
133.8 -0.36504108
133.85 -0.36229752
133.9 -0.35958752
133.95 -0.35691055
134 -0.35426607
134.05 -0.35165356
134.1 -0.3490725
134.15 -0.3465224
134.2 -0.34400275
134.25 -0.34151309
134.3 -0.33905294
134.35 -0.33662182
134.4 -0.3342193
134.45 -0.33184493
134.5 -0.32949825
134.55 -0.32717886
134.6 -0.32488633
134.65 -0.32262024
134.7 -0.32038019
134.75 -0.31816578
134.8 -0.31597663
134.85 -0.31381235
134.9 -0.31167257
134.95 -0.30955692
135 -0.30746504
135.05 -0.30539657
135.1 -0.30335117
135.15 -0.30132849
135.2 -0.2993282
135.25 -0.29734997
135.3 -0.29539348
135.35 -0.29345842
135.4 -0.29154446
135.45 -0.2896513
135.5 -0.28777865
135.55 -0.2859262
135.6 -0.28409368
135.65 -0.28228079
135.7 -0.28048725
135.75 -0.2787128
135.8 -0.27695716
135.85 -0.27522006
135.9 -0.27350125
135.95 -0.27180047
136 -0.27011747
136.05 -0.26845201
136.1 -0.26680383
136.15 -0.26517271
136.2 -0.2635584
136.25 -0.26196068
136.3 -0.26037932
136.35 -0.2588141
136.4 -0.2572648
136.45 -0.25573121
136.5 -0.25421311
136.55 -0.2527103
136.6 -0.25122256
136.65 -0.24974971
136.7 -0.24829154
136.75 -0.24684786
136.8 -0.24541848
136.85 -0.24400321
136.9 -0.24260186
136.95 -0.24121426
137 -0.23984022
137.05 -0.23847957
137.1 -0.23713214
137.15 -0.23579775
137.2 -0.23447624
137.25 -0.23316744
137.3 -0.23187119
137.35 -0.23058734
137.4 -0.22931572
137.45 -0.22805618
137.5 -0.22680856
137.55 -0.22557273
137.6 -0.22434853
137.65 -0.22313581
137.7 -0.22193444
137.75 -0.22074427
137.8 -0.21956516
137.85 -0.21839698
137.9 -0.2172396
137.95 -0.21609288
138 -0.21495669
138.05 -0.21383091
138.1 -0.2127154
138.15 -0.21161005
138.2 -0.21051473
138.25 -0.20942933
138.3 -0.20835372
138.35 -0.20728778
138.4 -0.20623141
138.45 -0.20518448
138.5 -0.2041469
138.55 -0.20311854
138.6 -0.2020993
138.65 -0.20108907
138.7 -0.20008775
138.75 -0.19909523
138.8 -0.19811142
138.85 -0.19713621
138.9 -0.1961695
138.95 -0.19521119
139 -0.19426119
139.05 -0.19331941
139.1 -0.19238575
139.15 -0.19146012
139.2 -0.19054242
139.25 -0.18963258
139.3 -0.18873049
139.35 -0.18783608
139.4 -0.18694926
139.45 -0.18606993
139.5 -0.18519803
139.55 -0.18433347
139.6 -0.18347617
139.65 -0.18262604
139.7 -0.18178301
139.75 -0.18094701
139.8 -0.18011795
139.85 -0.17929576
139.9 -0.17848036
139.95 -0.17767169
140 -0.17686966
Frequency / GHz SZmax(2)	Zmax(2) (a=2.81)/abs	dB
----------------------------------------------------------------------
90 -0.18191201
90.05 -0.18248993
90.1 -0.18307222
90.15 -0.18365892
90.2 -0.18425009
90.25 -0.18484577
90.3 -0.18544599
90.35 -0.18605081
90.4 -0.18666027
90.45 -0.18727442
90.5 -0.1878933
90.55 -0.18851696
90.6 -0.18914545
90.65 -0.18977883
90.7 -0.19041713
90.75 -0.19106041
90.8 -0.19170872
90.85 -0.19236211
90.9 -0.19302063
90.95 -0.19368434
91 -0.19435329
91.05 -0.19502754
91.1 -0.19570713
91.15 -0.19639213
91.2 -0.19708259
91.25 -0.19777857
91.3 -0.19848013
91.35 -0.19918732
91.4 -0.19990021
91.45 -0.20061885
91.5 -0.20134332
91.55 -0.20207366
91.6 -0.20280995
91.65 -0.20355224
91.7 -0.2043006
91.75 -0.20505511
91.8 -0.20581581
91.85 -0.20658279
91.9 -0.20735611
91.95 -0.20813584
92 -0.20892205
92.05 -0.20971481
92.1 -0.21051419
92.15 -0.21132028
92.2 -0.21213313
92.25 -0.21295284
92.3 -0.21377947
92.35 -0.2146131
92.4 -0.21545382
92.45 -0.2163017
92.5 -0.21715682
92.55 -0.21801926
92.6 -0.21888912
92.65 -0.21976647
92.7 -0.22065141
92.75 -0.22154401
92.8 -0.22244436
92.85 -0.22335257
92.9 -0.22426871
92.95 -0.22519289
93 -0.22612519
93.05 -0.22706571
93.1 -0.22801455
93.15 -0.22897181
93.2 -0.22993758
93.25 -0.23091197
93.3 -0.23189508
93.35 -0.23288702
93.4 -0.23388789
93.45 -0.2348978
93.5 -0.23591686
93.55 -0.23694518
93.6 -0.23798288
93.65 -0.23903006
93.7 -0.24008685
93.75 -0.24115336
93.8 -0.24222971
93.85 -0.24331603
93.9 -0.24441244
93.95 -0.24551907
94 -0.24663604
94.05 -0.24776348
94.1 -0.24890153
94.15 -0.25005032
94.2 -0.25120999
94.25 -0.25238068
94.3 -0.25356252
94.35 -0.25475566
94.4 -0.25596024
94.45 -0.25717642
94.5 -0.25840434
94.55 -0.25964416
94.6 -0.26089604
94.65 -0.26216012
94.7 -0.26343657
94.75 -0.26472556
94.8 -0.26602725
94.85 -0.26734181
94.9 -0.26866941
94.95 -0.27001023
95 -0.27136444
95.05 -0.27273223
95.1 -0.27411378
95.15 -0.27550927
95.2 -0.27691889
95.25 -0.27834285
95.3 -0.27978134
95.35 -0.28123455
95.4 -0.28270269
95.45 -0.28418597
95.5 -0.2856846
95.55 -0.2871988
95.6 -0.28872878
95.65 -0.29027477
95.7 -0.29183699
95.75 -0.29341568
95.8 -0.29501106
95.85 -0.29662338
95.9 -0.29825289
95.95 -0.29989982
96 -0.30156444
96.05 -0.303247
96.1 -0.30494776
96.15 -0.30666699
96.2 -0.30840496
96.25 -0.31016195
96.3 -0.31193823
96.35 -0.31373411
96.4 -0.31554987
96.45 -0.3173858
96.5 -0.31924222
96.55 -0.32111943
96.6 -0.32301775
96.65 -0.3249375
96.7 -0.32687901
96.75 -0.32884261
96.8 -0.33082865
96.85 -0.33283747
96.9 -0.33486943
96.95 -0.33692489
97 -0.33900422
97.05 -0.34110779
97.1 -0.34323599
97.15 -0.34538921
97.2 -0.34756785
97.25 -0.34977231
97.3 -0.35200302
97.35 -0.35426039
97.4 -0.35654486
97.45 -0.35885687
97.5 -0.36119687
97.55 -0.36356533
97.6 -0.3659627
97.65 -0.36838948
97.7 -0.37084615
97.75 -0.3733332
97.8 -0.37585116
97.85 -0.37840054
97.9 -0.38098187
97.95 -0.3835957
98 -0.38624259
98.05 -0.38892309
98.1 -0.3916378
98.15 -0.3943873
98.2 -0.3971722
98.25 -0.39999311
98.3 -0.40285068
98.35 -0.40574554
98.4 -0.40867835
98.45 -0.4116498
98.5 -0.41466058
98.55 -0.41771138
98.6 -0.42080293
98.65 -0.42393597
98.7 -0.42711125
98.75 -0.43032956
98.8 -0.43359167
98.85 -0.4368984
98.9 -0.44025057
98.95 -0.44364903
99 -0.44709465
99.05 -0.45058832
99.1 -0.45413093
99.15 -0.45772344
99.2 -0.46136677
99.25 -0.46506192
99.3 -0.46880987
99.35 -0.47261165
99.4 -0.47646831
99.45 -0.48038092
99.5 -0.48435057
99.55 -0.4883784
99.6 -0.49246556
99.65 -0.49661323
99.7 -0.50082262
99.75 -0.50509497
99.8 -0.50943156
99.85 -0.51383369
99.9 -0.51830271
99.95 -0.52283999
100 -0.52744692
100.05 -0.53212497
100.1 -0.53687561
100.15 -0.54170036
100.2 -0.54660078
100.25 -0.55157848
100.3 -0.5566351
100.35 -0.56177231
100.4 -0.56699187
100.45 -0.57229554
100.5 -0.57768516
100.55 -0.58316259
100.6 -0.58872976
100.65 -0.59438866
100.7 -0.60014131
100.75 -0.60598981
100.8 -0.6119363
100.85 -0.61798299
100.9 -0.62413215
100.95 -0.63038611
101 -0.63674726
101.05 -0.64321808
101.1 -0.64980109
101.15 -0.65649891
101.2 -0.66331422
101.25 -0.67024978
101.3 -0.67730843
101.35 -0.68449309
101.4 -0.69180677
101.45 -0.69925257
101.5 -0.70683369
101.55 -0.71455339
101.6 -0.72241507
101.65 -0.7304222
101.7 -0.73857838
101.75 -0.7468873
101.8 -0.75535277
101.85 -0.76397871
101.9 -0.77276917
101.95 -0.78172833
102 -0.79086047
102.05 -0.80017004
102.1 -0.80966161
102.15 -0.81933989
102.2 -0.82920974
102.25 -0.83927619
102.3 -0.84954441
102.35 -0.86001975
102.4 -0.87070772
102.45 -0.88161403
102.5 -0.89274453
102.55 -0.90410532
102.6 -0.91570265
102.65 -0.927543
102.7 -0.93963306
102.75 -0.95197973
102.8 -0.96459016
102.85 -0.97747173
102.9 -0.99063206
102.95 -1.004079
103 -1.0178208
103.05 -1.0318658
103.1 -1.0462227
103.15 -1.0609005
103.2 -1.0759086
103.25 -1.0912567
103.3 -1.1069546
103.35 -1.1230126
103.4 -1.1394416
103.45 -1.1562525
103.5 -1.1734568
103.55 -1.1910662
103.6 -1.2090932
103.65 -1.2275503
103.7 -1.2464507
103.75 -1.265808
103.8 -1.2856363
103.85 -1.3059502
103.9 -1.3267648
103.95 -1.3480958
104 -1.3699593
104.05 -1.3923722
104.1 -1.4153519
104.15 -1.4389164
104.2 -1.4630843
104.25 -1.487875
104.3 -1.5133086
104.35 -1.5394057
104.4 -1.566188
104.45 -1.5936775
104.5 -1.6218975
104.55 -1.6508717
104.6 -1.6806249
104.65 -1.7111827
104.7 -1.7425715
104.75 -1.7748188
104.8 -1.807953
104.85 -1.8420033
104.9 -1.8770001
104.95 -1.9129748
105 -1.9499599
105.05 -1.9879886
105.1 -2.0270957
105.15 -2.0673169
105.2 -2.1086888
105.25 -2.1512495
105.3 -2.195038
105.35 -2.2400946
105.4 -2.2864605
105.45 -2.3341783
105.5 -2.3832915
105.55 -2.4338449
105.6 -2.4858842
105.65 -2.5394562
105.7 -2.5946085
105.75 -2.6513897
105.8 -2.7098492
105.85 -2.7700371
105.9 -2.8320038
105.95 -2.8958006
106 -2.9614784
106.05 -3.0290884
106.1 -3.0986817
106.15 -3.1703084
106.2 -3.2440182
106.25 -3.319859
106.3 -3.3978775
106.35 -3.4781178
106.4 -3.5606212
106.45 -3.6454257
106.5 -3.732565
106.55 -3.8220676
106.6 -3.9139562
106.65 -4.0082462
106.7 -4.1049449
106.75 -4.2040499
106.8 -4.3055479
106.85 -4.4094125
106.9 -4.5156033
106.95 -4.6240631
107 -4.7347163
107.05 -4.8474662
107.1 -4.9621928
107.15 -5.0787502
107.2 -5.1969637
107.25 -5.3166267
107.3 -5.4374985
107.35 -5.5593006
107.4 -5.6817145
107.45 -5.8043787
107.5 -5.9268868
107.55 -6.0487855
107.6 -6.1695735
107.65 -6.2887018
107.7 -6.4055737
107.75 -6.5195482
107.8 -6.629943
107.85 -6.7360406
107.9 -6.8370959
107.95 -6.9323461
108 -7.0210221
108.05 -7.1023627
108.1 -7.1756298
108.15 -7.2401252
108.2 -7.2952077
108.25 -7.3403104
108.3 -7.3749569
108.35 -7.3987758
108.4 -7.4115121
108.45 -7.4130357
108.5 -7.4033458
108.55 -7.3825709
108.6 -7.3509645
108.65 -7.3088975
108.7 -7.2568462
108.75 -7.1953781
108.8 -7.125136
108.85 -7.0468206
108.9 -6.9611731
108.95 -6.8689589
109 -6.7709514
109.05 -6.6679188
109.1 -6.5606116
109.15 -6.4497532
109.2 -6.3360315
109.25 -6.2200938
109.3 -6.1025423
109.35 -5.9839317
109.4 -5.8647688
109.45 -5.7455119
109.5 -5.6265721
109.55 -5.5083153
109.6 -5.391064
109.65 -5.2751001
109.7 -5.1606679
109.75 -5.0479766
109.8 -4.9372034
109.85 -4.8284965
109.9 -4.7219779
109.95 -4.6177455
110 -4.5158766
110.05 -4.4164293
110.1 -4.3194451
110.15 -4.2249509
110.2 -4.1329607
110.25 -4.0434773
110.3 -3.9564938
110.35 -3.871995
110.4 -3.7899583
110.45 -3.7103552
110.5 -3.6331523
110.55 -3.5583115
110.6 -3.4857916
110.65 -3.4155483
110.7 -3.3475353
110.75 -3.2817044
110.8 -3.2180063
110.85 -3.1563908
110.9 -3.0968071
110.95 -3.0392043
111 -2.9835314
111.05 -2.929738
111.1 -2.8777738
111.15 -2.8275892
111.2 -2.7791355
111.25 -2.7323648
111.3 -2.68723
111.35 -2.6436852
111.4 -2.6016857
111.45 -2.5611876
111.5 -2.5221485
111.55 -2.4845271
111.6 -2.4482833
111.65 -2.4133783
111.7 -2.3797744
111.75 -2.3474352
111.8 -2.3163257
111.85 -2.2864119
111.9 -2.257661
111.95 -2.2300416
112 -2.2035232
112.05 -2.1780768
112.1 -2.1536741
112.15 -2.1302883
112.2 -2.1078935
112.25 -2.0864647
112.3 -2.0659782
112.35 -2.0464113
112.4 -2.0277421
112.45 -2.0099497
112.5 -1.9930143
112.55 -1.9769169
112.6 -1.9616393
112.65 -1.9471642
112.7 -1.9334754
112.75 -1.9205571
112.8 -1.9083947
112.85 -1.896974
112.9 -1.8862819
112.95 -1.8763058
113 -1.867034
113.05 -1.8584553
113.1 -1.8505593
113.15 -1.8433364
113.2 -1.8367774
113.25 -1.8308739
113.3 -1.8256182
113.35 -1.821003
113.4 -1.8170218
113.45 -1.8136685
113.5 -1.8109378
113.55 -1.8088248
113.6 -1.8073253
113.65 -1.8064356
113.7 -1.8061524
113.75 -1.8064732
113.8 -1.8073958
113.85 -1.8089188
113.9 -1.8110409
113.95 -1.8137618
114 -1.8170814
114.05 -1.8210003
114.1 -1.8255193
114.15 -1.8306401
114.2 -1.8363646
114.25 -1.8426954
114.3 -1.8496354
114.35 -1.8571883
114.4 -1.865358
114.45 -1.8741491
114.5 -1.8835665
114.55 -1.8936159
114.6 -1.9043033
114.65 -1.9156352
114.7 -1.9276186
114.75 -1.9402613
114.8 -1.9535712
114.85 -1.967557
114.9 -1.9822278
114.95 -1.9975934
115 -2.0136638
115.05 -2.0304498
115.1 -2.0479627
115.15 -2.0662143
115.2 -2.0852169
115.25 -2.1049834
115.3 -2.1255274
115.35 -2.1468627
115.4 -2.1690039
115.45 -2.1919661
115.5 -2.2157649
115.55 -2.2404166
115.6 -2.2659379
115.65 -2.292346
115.7 -2.3196587
115.75 -2.3478945
115.8 -2.3770721
115.85 -2.407211
115.9 -2.4383309
115.95 -2.4704522
116 -2.5035957
116.05 -2.5377825
116.1 -2.5730343
116.15 -2.609373
116.2 -2.646821
116.25 -2.6854007
116.3 -2.725135
116.35 -2.7660468
116.4 -2.8081592
116.45 -2.8514952
116.5 -2.8960779
116.55 -2.9419302
116.6 -2.9890747
116.65 -3.0375336
116.7 -3.0873286
116.75 -3.1384809
116.8 -3.1910106
116.85 -3.2449371
116.9 -3.3002783
116.95 -3.3570509
117 -3.4152698
117.05 -3.474948
117.1 -3.5360963
117.15 -3.5987229
117.2 -3.662833
117.25 -3.7284287
117.3 -3.7955082
117.35 -3.8640657
117.4 -3.9340906
117.45 -4.0055672
117.5 -4.0784739
117.55 -4.152783
117.6 -4.2284595
117.65 -4.305461
117.7 -4.3837364
117.75 -4.4632255
117.8 -4.5438584
117.85 -4.625554
117.9 -4.7082199
117.95 -4.7917511
118 -4.8760293
118.05 -4.9609222
118.1 -5.0462824
118.15 -5.131947
118.2 -5.2177368
118.25 -5.3034555
118.3 -5.3888898
118.35 -5.4738088
118.4 -5.5579641
118.45 -5.6410898
118.5 -5.7229033
118.55 -5.803106
118.6 -5.8813844
118.65 -5.9574121
118.7 -6.0308513
118.75 -6.1013558
118.8 -6.1685734
118.85 -6.2321502
118.9 -6.2917334
118.95 -6.3469764
119 -6.397543
119.05 -6.4431118
119.1 -6.4833819
119.15 -6.5180772
119.2 -6.5469509
119.25 -6.5697908
119.3 -6.5864222
119.35 -6.596712
119.4 -6.6005707
119.45 -6.597955
119.5 -6.5888676
119.55 -6.5733582
119.6 -6.5515217
119.65 -6.5234968
119.7 -6.489463
119.75 -6.4496374
119.8 -6.4042704
119.85 -6.3536417
119.9 -6.298055
119.95 -6.2378335
120 -6.173315
120.05 -6.104847
120.1 -6.0327823
120.15 -5.9574747
120.2 -5.8792753
120.25 -5.7985291
120.3 -5.7155722
120.35 -5.630729
120.4 -5.5443107
120.45 -5.4566133
120.5 -5.3679168
120.55 -5.2784841
120.6 -5.1885607
120.65 -5.0983745
120.7 -5.008136
120.75 -4.918038
120.8 -4.828257
120.85 -4.7389528
120.9 -4.6502698
120.95 -4.5623374
121 -4.4752711
121.05 -4.389173
121.1 -4.3041329
121.15 -4.220229
121.2 -4.1375288
121.25 -4.05609
121.3 -3.975961
121.35 -3.8971819
121.4 -3.8197853
121.45 -3.7437966
121.5 -3.6692351
121.55 -3.5961142
121.6 -3.5244423
121.65 -3.4542231
121.7 -3.3854562
121.75 -3.3181374
121.8 -3.2522594
121.85 -3.1878118
121.9 -3.1247818
121.95 -3.0631544
122 -3.0029125
122.05 -2.9440375
122.1 -2.8865092
122.15 -2.8303064
122.2 -2.7754066
122.25 -2.7217868
122.3 -2.669423
122.35 -2.618291
122.4 -2.5683659
122.45 -2.5196227
122.5 -2.4720361
122.55 -2.4255809
122.6 -2.3802317
122.65 -2.3359633
122.7 -2.2927506
122.75 -2.2505685
122.8 -2.2093925
122.85 -2.169198
122.9 -2.129961
122.95 -2.0916577
123 -2.0542647
123.05 -2.017759
123.1 -1.982118
123.15 -1.9473196
123.2 -1.9133421
123.25 -1.8801641
123.3 -1.8477649
123.35 -1.8161242
123.4 -1.7852219
123.45 -1.7550388
123.5 -1.7255557
123.55 -1.6967544
123.6 -1.6686166
123.65 -1.6411248
123.7 -1.6142618
123.75 -1.5880111
123.8 -1.5623563
123.85 -1.5372815
123.9 -1.5127715
123.95 -1.4888111
124 -1.4653859
124.05 -1.4424816
124.1 -1.4200845
124.15 -1.3981811
124.2 -1.3767584
124.25 -1.3558038
124.3 -1.335305
124.35 -1.3152499
124.4 -1.295627
124.45 -1.276425
124.5 -1.2576328
124.55 -1.2392399
124.6 -1.2212358
124.65 -1.2036106
124.7 -1.1863544
124.75 -1.1694577
124.8 -1.1529114
124.85 -1.1367065
124.9 -1.1208342
124.95 -1.1052861
125 -1.0900541
125.05 -1.0751301
125.1 -1.0605064
125.15 -1.0461754
125.2 -1.0321299
125.25 -1.0183628
125.3 -1.0048671
125.35 -0.99163619
125.4 -0.9786635
125.45 -0.96594271
125.5 -0.95346768
125.55 -0.94123244
125.6 -0.92923116
125.65 -0.9174582
125.7 -0.90590808
125.75 -0.89457546
125.8 -0.88345515
125.85 -0.87254212
125.9 -0.86183145
125.95 -0.8513184
126 -0.84099831
126.05 -0.83086668
126.1 -0.82091913
126.15 -0.8111514
126.2 -0.80155933
126.25 -0.79213889
126.3 -0.78288615
126.35 -0.7737973
126.4 -0.76486862
126.45 -0.75609649
126.5 -0.74747739
126.55 -0.7390079
126.6 -0.73068467
126.65 -0.72250447
126.7 -0.71446412
126.75 -0.70656056
126.8 -0.69879078
126.85 -0.69115187
126.9 -0.68364098
126.95 -0.67625535
127 -0.66899227
127.05 -0.66184911
127.1 -0.65482332
127.15 -0.64791241
127.2 -0.64111393
127.25 -0.63442552
127.3 -0.62784488
127.35 -0.62136974
127.4 -0.61499791
127.45 -0.60872726
127.5 -0.60255569
127.55 -0.59648117
127.6 -0.59050172
127.65 -0.5846154
127.7 -0.57882033
127.75 -0.57311465
127.8 -0.56749658
127.85 -0.56196436
127.9 -0.55651628
127.95 -0.55115068
128 -0.54586591
128.05 -0.54066039
128.1 -0.53553258
128.15 -0.53048094
128.2 -0.52550401
128.25 -0.52060034
128.3 -0.51576851
128.35 -0.51100716
128.4 -0.50631492
128.45 -0.5016905
128.5 -0.49713261
128.55 -0.49263998
128.6 -0.4882114
128.65 -0.48384567
128.7 -0.47954161
128.75 -0.47529809
128.8 -0.47111399
128.85 -0.46698821
128.9 -0.46291968
128.95 -0.45890736
129 -0.45495024
129.05 -0.4510473
129.1 -0.44719759
129.15 -0.44340013
129.2 -0.439654
129.25 -0.43595828
129.3 -0.43231208
129.35 -0.42871453
129.4 -0.42516478
129.45 -0.42166197
129.5 -0.4182053
129.55 -0.41479397
129.6 -0.41142719
129.65 -0.40810419
129.7 -0.40482422
129.75 -0.40158655
129.8 -0.39839045
129.85 -0.39523523
129.9 -0.39212019
129.95 -0.38904465
130 -0.38600796
130.05 -0.38300946
130.1 -0.38004852
130.15 -0.37712452
130.2 -0.37423685
130.25 -0.37138492
130.3 -0.36856813
130.35 -0.36578591
130.4 -0.36303771
130.45 -0.36032297
130.5 -0.35764115
130.55 -0.35499173
130.6 -0.35237419
130.65 -0.34978802
130.7 -0.34723271
130.75 -0.34470779
130.8 -0.34221278
130.85 -0.3397472
130.9 -0.3373106
130.95 -0.33490252
131 -0.33252252
131.05 -0.33017017
131.1 -0.32784504
131.15 -0.32554672
131.2 -0.32327479
131.25 -0.32102885
131.3 -0.31880852
131.35 -0.31661339
131.4 -0.31444309
131.45 -0.31229726
131.5 -0.31017552
131.55 -0.30807751
131.6 -0.30600288
131.65 -0.3039513
131.7 -0.3019224
131.75 -0.29991588
131.8 -0.29793139
131.85 -0.29596861
131.9 -0.29402724
131.95 -0.29210695
132 -0.29020745
132.05 -0.28832844
132.1 -0.28646963
132.15 -0.28463072
132.2 -0.28281143
132.25 -0.28101149
132.3 -0.27923062
132.35 -0.27746855
132.4 -0.27572503
132.45 -0.27399979
132.5 -0.27229257
132.55 -0.27060313
132.6 -0.26893122
132.65 -0.2672766
132.7 -0.26563903
132.75 -0.26401828
132.8 -0.26241412
132.85 -0.26082633
132.9 -0.25925467
132.95 -0.25769894
133 -0.25615892
133.05 -0.25463441
133.1 -0.25312518
133.15 -0.25163104
133.2 -0.2501518
133.25 -0.24868724
133.3 -0.24723718
133.35 -0.24580143
133.4 -0.2443798
133.45 -0.24297211
133.5 -0.24157818
133.55 -0.24019781
133.6 -0.23883086
133.65 -0.23747713
133.7 -0.23613645
133.75 -0.23480868
133.8 -0.23349362
133.85 -0.23219114
133.9 -0.23090106
133.95 -0.22962323
134 -0.2283575
134.05 -0.22710371
134.1 -0.22586172
134.15 -0.22463137
134.2 -0.22341253
134.25 -0.22220505
134.3 -0.22100879
134.35 -0.21982361
134.4 -0.21864938
134.45 -0.21748597
134.5 -0.21633323
134.55 -0.21519104
134.6 -0.21405928
134.65 -0.21293782
134.7 -0.21182653
134.75 -0.21072529
134.8 -0.20963399
134.85 -0.20855249
134.9 -0.2074807
134.95 -0.20641849
135 -0.20536574
135.05 -0.20432236
135.1 -0.20328822
135.15 -0.20226322
135.2 -0.20124726
135.25 -0.20024022
135.3 -0.19924201
135.35 -0.19825252
135.4 -0.19727165
135.45 -0.19629931
135.5 -0.19533539
135.55 -0.1943798
135.6 -0.19343245
135.65 -0.19249324
135.7 -0.19156208
135.75 -0.19063888
135.8 -0.18972355
135.85 -0.188816
135.9 -0.18791614
135.95 -0.18702389
136 -0.18613917
136.05 -0.18526189
136.1 -0.18439197
136.15 -0.18352933
136.2 -0.18267389
136.25 -0.18182556
136.3 -0.18098428
136.35 -0.18014997
136.4 -0.17932255
136.45 -0.17850194
136.5 -0.17768807
136.55 -0.17688088
136.6 -0.17608029
136.65 -0.17528622
136.7 -0.17449861
136.75 -0.1737174
136.8 -0.17294251
136.85 -0.17217387
136.9 -0.17141143
136.95 -0.17065511
137 -0.16990486
137.05 -0.1691606
137.1 -0.16842228
137.15 -0.16768984
137.2 -0.16696321
137.25 -0.16624234
137.3 -0.16552716
137.35 -0.16481762
137.4 -0.16411366
137.45 -0.16341523
137.5 -0.16272226
137.55 -0.16203471
137.6 -0.16135251
137.65 -0.16067562
137.7 -0.16000398
137.75 -0.15933754
137.8 -0.15867624
137.85 -0.15802004
137.9 -0.15736889
137.95 -0.15672273
138 -0.15608152
138.05 -0.15544521
138.1 -0.15481375
138.15 -0.15418709
138.2 -0.15356519
138.25 -0.152948
138.3 -0.15233547
138.35 -0.15172757
138.4 -0.15112423
138.45 -0.15052544
138.5 -0.14993113
138.55 -0.14934126
138.6 -0.1487558
138.65 -0.14817471
138.7 -0.14759793
138.75 -0.14702544
138.8 -0.14645718
138.85 -0.14589313
138.9 -0.14533324
138.95 -0.14477747
139 -0.14422579
139.05 -0.14367815
139.1 -0.14313453
139.15 -0.14259488
139.2 -0.14205916
139.25 -0.14152735
139.3 -0.1409994
139.35 -0.14047529
139.4 -0.13995497
139.45 -0.13943841
139.5 -0.13892559
139.55 -0.13841645
139.6 -0.13791098
139.65 -0.13740914
139.7 -0.1369109
[truncated: 3,015 more rows]
