# Supplementary material
Source: publisher figshare collection journal article supplement (https://frontiersin.figshare.com/ndownloader/files/24979811)
Supplement: Supplementary file 1 [file 24979811 › datasheet/simulation of phaseshifter/phase.csv]

Frequency / GHz SZmax(2)	Zmax(2) (a=2.51)/arg	degrees
----------------------------------------------------------------------
90 98.738018
90.05 98.644039
90.1 98.549861
90.15 98.455484
90.2 98.360907
90.25 98.266128
90.3 98.171147
90.35 98.075962
90.4 97.980573
90.45 97.884979
90.5 97.789178
90.55 97.693169
90.6 97.596952
90.65 97.500525
90.7 97.403887
90.75 97.307037
90.8 97.209974
90.85 97.112698
90.9 97.015206
90.95 96.917497
91 96.819571
91.05 96.721427
91.1 96.623063
91.15 96.524478
91.2 96.425671
91.25 96.32664
91.3 96.227385
91.35 96.127905
91.4 96.028197
91.45 95.928262
91.5 95.828097
91.55 95.727701
91.6 95.627074
91.65 95.526214
91.7 95.425119
91.75 95.323789
91.8 95.222222
91.85 95.120416
91.9 95.018372
91.95 94.916086
92 94.813558
92.05 94.710787
92.1 94.60777
92.15 94.504508
92.2 94.400997
92.25 94.297238
92.3 94.193228
92.35 94.088967
92.4 93.984452
92.45 93.879682
92.5 93.774656
92.55 93.669373
92.6 93.56383
92.65 93.458027
92.7 93.351961
92.75 93.245632
92.8 93.139038
92.85 93.032177
92.9 92.925047
92.95 92.817648
93 92.709977
93.05 92.602033
93.1 92.493815
93.15 92.38532
93.2 92.276547
93.25 92.167494
93.3 92.05816
93.35 91.948543
93.4 91.838642
93.45 91.728453
93.5 91.617977
93.55 91.507211
93.6 91.396153
93.65 91.284801
93.7 91.173154
93.75 91.06121
93.8 90.948967
93.85 90.836424
93.9 90.723577
93.95 90.610426
94 90.496968
94.05 90.383202
94.1 90.269126
94.15 90.154737
94.2 90.040034
94.25 89.925014
94.3 89.809676
94.35 89.694018
94.4 89.578037
94.45 89.461732
94.5 89.3451
94.55 89.22814
94.6 89.110848
94.65 88.993224
94.7 88.875264
94.75 88.756967
94.8 88.63833
94.85 88.519351
94.9 88.400028
94.95 88.280358
95 88.16034
95.05 88.039971
95.1 87.919248
95.15 87.798169
95.2 87.676732
95.25 87.554934
95.3 87.432773
95.35 87.310246
95.4 87.187352
95.45 87.064086
95.5 86.940447
95.55 86.816433
95.6 86.692039
95.65 86.567265
95.7 86.442107
95.75 86.316563
95.8 86.190629
95.85 86.064304
95.9 85.937583
95.95 85.810466
96 85.682948
96.05 85.555026
96.1 85.426699
96.15 85.297962
96.2 85.168813
96.25 85.03925
96.3 84.909268
96.35 84.778866
96.4 84.648039
96.45 84.516784
96.5 84.3851
96.55 84.252982
96.6 84.120426
96.65 83.987431
96.7 83.853992
96.75 83.720107
96.8 83.585771
96.85 83.450982
96.9 83.315736
96.95 83.180029
97 83.043859
97.05 82.907221
97.1 82.770111
97.15 82.632527
97.2 82.494465
97.25 82.35592
97.3 82.216889
97.35 82.077369
97.4 81.937355
97.45 81.796843
97.5 81.65583
97.55 81.514311
97.6 81.372283
97.65 81.229742
97.7 81.086683
97.75 80.943101
97.8 80.798994
97.85 80.654357
97.9 80.509184
97.95 80.363473
98 80.217218
98.05 80.070416
98.1 79.92306
98.15 79.775148
98.2 79.626674
98.25 79.477633
98.3 79.328022
98.35 79.177834
98.4 79.027065
98.45 78.875711
98.5 78.723766
98.55 78.571225
98.6 78.418083
98.65 78.264335
98.7 78.109975
98.75 77.954999
98.8 77.799401
98.85 77.643175
98.9 77.486316
98.95 77.328819
99 77.170677
99.05 77.011886
99.1 76.852438
99.15 76.692329
99.2 76.531553
99.25 76.370103
99.3 76.207973
99.35 76.045158
99.4 75.88165
99.45 75.717444
99.5 75.552533
99.55 75.38691
99.6 75.22057
99.65 75.053505
99.7 74.885708
99.75 74.717174
99.8 74.547894
99.85 74.377862
99.9 74.20707
99.95 74.035512
100 73.86318
100.05 73.690067
100.1 73.516164
100.15 73.341465
100.2 73.165962
100.25 72.989647
100.3 72.812512
100.35 72.634548
100.4 72.455749
100.45 72.276105
100.5 72.095607
100.55 71.914249
100.6 71.73202
100.65 71.548912
100.7 71.364916
100.75 71.180024
100.8 70.994226
100.85 70.807512
100.9 70.619874
100.95 70.431302
101 70.241786
101.05 70.051316
101.1 69.859882
101.15 69.667475
101.2 69.474084
101.25 69.279698
101.3 69.084307
101.35 68.887901
101.4 68.690467
101.45 68.491997
101.5 68.292477
101.55 68.091897
101.6 67.890245
101.65 67.68751
101.7 67.483679
101.75 67.278741
101.8 67.072683
101.85 66.865492
101.9 66.657157
101.95 66.447663
102 66.236999
102.05 66.025151
102.1 65.812105
102.15 65.597847
102.2 65.382365
102.25 65.165643
102.3 64.947667
102.35 64.728423
102.4 64.507896
102.45 64.286071
102.5 64.062932
102.55 63.838464
102.6 63.612651
102.65 63.385478
102.7 63.156927
102.75 62.926982
102.8 62.695627
102.85 62.462844
102.9 62.228615
102.95 61.992924
103 61.755751
103.05 61.517079
103.1 61.276889
103.15 61.035161
103.2 60.791878
103.25 60.547018
103.3 60.300563
103.35 60.052491
103.4 59.802782
103.45 59.551415
103.5 59.298369
103.55 59.043622
103.6 58.787151
103.65 58.528935
103.7 58.268949
103.75 58.007172
103.8 57.743578
103.85 57.478144
103.9 57.210845
103.95 56.941657
104 56.670552
104.05 56.397506
104.1 56.122492
104.15 55.845483
104.2 55.566451
104.25 55.285368
104.3 55.002206
104.35 54.716935
104.4 54.429527
104.45 54.139951
104.5 53.848175
104.55 53.554169
104.6 53.257901
104.65 52.959338
104.7 52.658447
104.75 52.355193
104.8 52.049543
104.85 51.741462
104.9 51.430913
104.95 51.117859
105 50.802264
105.05 50.484089
105.1 50.163296
105.15 49.839845
105.2 49.513695
105.25 49.184805
105.3 48.853133
105.35 48.518637
105.4 48.181271
105.45 47.840992
105.5 47.497754
105.55 47.151511
105.6 46.802214
105.65 46.449814
105.7 46.094264
105.75 45.735511
105.8 45.373504
105.85 45.008191
105.9 44.639516
105.95 44.267426
106 43.891863
106.05 43.51277
106.1 43.130089
106.15 42.743759
106.2 42.353719
106.25 41.959905
106.3 41.562255
106.35 41.160701
106.4 40.755178
106.45 40.345616
106.5 39.931946
106.55 39.514096
106.6 39.091991
106.65 38.665558
106.7 38.23472
106.75 37.799398
106.8 37.359511
106.85 36.914978
106.9 36.465715
106.95 36.011634
107 35.552649
107.05 35.088669
107.1 34.619602
107.15 34.145353
107.2 33.665825
107.25 33.18092
107.3 32.690535
107.35 32.194567
107.4 31.69291
107.45 31.185454
107.5 30.672087
107.55 30.152696
107.6 29.627162
107.65 29.095366
107.7 28.557184
107.75 28.01249
107.8 27.461154
107.85 26.903044
107.9 26.338024
107.95 25.765954
108 25.186691
108.05 24.600089
108.1 24.005996
108.15 23.404258
108.2 22.794717
108.25 22.177211
108.3 21.551572
108.35 20.91763
108.4 20.275209
108.45 19.624128
108.5 18.964203
108.55 18.295243
108.6 17.617054
108.65 16.929436
108.7 16.232183
108.75 15.525083
108.8 14.80792
108.85 14.080471
108.9 13.342508
108.95 12.593795
109 11.834091
109.05 11.063148
109.1 10.28071
109.15 9.4865166
109.2 8.6802975
109.25 7.8617761
109.3 7.030668
109.35 6.1866807
109.4 5.3295136
109.45 4.4588576
109.5 3.5743948
109.55 2.6757985
109.6 1.7627325
109.65 0.83485147
109.7 -0.10820009
109.75 -1.0667876
109.8 -2.0412869
109.85 -3.0320845
109.9 -4.0395779
109.95 -5.0641758
110 -6.1062987
110.05 -7.1663788
110.1 -8.2448606
110.15 -9.342201
110.2 -10.45887
110.25 -11.59535
110.3 -12.752137
110.35 -13.929741
110.4 -15.128685
110.45 -16.349508
110.5 -17.59276
110.55 -18.859007
110.6 -20.14883
110.65 -21.462823
110.7 -22.801596
110.75 -24.16577
110.8 -25.555982
110.85 -26.972883
110.9 -28.417135
110.95 -29.889413
111 -31.390403
111.05 -32.920802
111.1 -34.481313
111.15 -36.072649
111.2 -37.695527
111.25 -39.350665
111.3 -41.038782
111.35 -42.760594
111.4 -44.516809
111.45 -46.308122
111.5 -48.135213
111.55 -49.998739
111.6 -51.899327
111.65 -53.83757
111.7 -55.814017
111.75 -57.829161
111.8 -59.883435
111.85 -61.9772
111.9 -64.11073
111.95 -66.284205
112 -68.497692
112.05 -70.751141
112.1 -73.044361
112.15 -75.377015
112.2 -77.748598
112.25 -80.158433
112.3 -82.605652
112.35 -85.089186
112.4 -87.607759
112.45 -90.159877
112.5 -92.743824
112.55 -95.357664
112.6 -97.999239
112.65 -100.66618
112.7 -103.3559
112.75 -106.06564
112.8 -108.79246
112.85 -111.53327
112.9 -114.28485
112.95 -117.04389
113 -119.80703
113.05 -122.57084
113.1 -125.33194
113.15 -128.08696
113.2 -130.8326
113.25 -133.56566
113.3 -136.28309
113.35 -138.98197
113.4 -141.65957
113.45 -144.31335
113.5 -146.94099
113.55 -149.54037
113.6 -152.1096
113.65 -154.64704
113.7 -157.15124
113.75 -159.62098
113.8 -162.05526
113.85 -164.45327
113.9 -166.8144
113.95 -169.13822
114 -171.42444
114.05 -173.67296
114.1 -175.88378
114.15 -178.05705
114.2 -180.19302
114.25 -182.29203
114.3 -184.35451
114.35 -186.38096
114.4 -188.37195
114.45 -190.32809
114.5 -192.25006
114.55 -194.13854
114.6 -195.99426
114.65 -197.81797
114.7 -199.61043
114.75 -201.37242
114.8 -203.10472
114.85 -204.80812
114.9 -206.4834
114.95 -208.13134
115 -209.75272
115.05 -211.3483
115.1 -212.91886
115.15 -214.46513
115.2 -215.98786
115.25 -217.48778
115.3 -218.96558
115.35 -220.42198
115.4 -221.85766
115.45 -223.27329
115.5 -224.66952
115.55 -226.047
115.6 -227.40636
115.65 -228.74821
115.7 -230.07316
115.75 -231.38178
115.8 -232.67465
115.85 -233.95234
115.9 -235.21539
115.95 -236.46433
116 -237.69969
116.05 -238.92199
116.1 -240.13171
116.15 -241.32936
116.2 -242.5154
116.25 -243.69032
116.3 -244.85456
116.35 -246.00859
116.4 -247.15283
116.45 -248.28773
116.5 -249.41371
116.55 -250.53118
116.6 -251.64056
116.65 -252.74225
116.7 -253.83664
116.75 -254.92412
116.8 -256.00508
116.85 -257.07989
116.9 -258.14893
116.95 -259.21256
117 -260.27115
117.05 -261.32506
117.1 -262.37464
117.15 -263.42024
117.2 -264.46221
117.25 -265.50089
117.3 -266.53663
117.35 -267.56976
117.4 -268.60062
117.45 -269.62955
117.5 -270.65687
117.55 -271.68293
117.6 -272.70804
117.65 -273.73254
117.7 -274.75677
117.75 -275.78104
117.8 -276.80568
117.85 -277.83103
117.9 -278.85741
117.95 -279.88516
118 -280.91461
118.05 -281.94608
118.1 -282.97992
118.15 -284.01645
118.2 -285.05602
118.25 -286.09897
118.3 -287.14564
118.35 -288.19638
118.4 -289.25154
118.45 -290.31146
118.5 -291.37652
118.55 -292.44707
118.6 -293.52347
118.65 -294.60611
118.7 -295.69535
118.75 -296.79157
118.8 -297.89517
118.85 -299.00654
118.9 -300.12607
118.95 -301.25418
119 -302.39129
119.05 -303.5378
119.1 -304.69416
119.15 -305.86081
119.2 -307.03818
119.25 -308.22675
119.3 -309.42697
119.35 -310.63932
119.4 -311.86429
119.45 -313.10238
119.5 -314.3541
119.55 -315.61997
119.6 -316.90053
119.65 -318.19633
119.7 -319.50792
119.75 -320.83588
119.8 -322.1808
119.85 -323.54329
119.9 -324.92397
119.95 -326.32347
120 -327.74245
120.05 -329.18158
120.1 -330.64154
120.15 -332.12305
120.2 -333.62681
120.25 -335.15359
120.3 -336.70413
120.35 -338.27923
120.4 -339.87966
120.45 -341.50626
120.5 -343.15986
120.55 -344.84131
120.6 -346.55148
120.65 -348.29125
120.7 -350.06153
120.75 -351.86323
120.8 -353.69727
120.85 -355.56458
120.9 -357.46609
120.95 -359.40274
121 -361.37546
121.05 -363.38516
121.1 -365.43274
121.15 -367.51907
121.2 -369.645
121.25 -371.81131
121.3 -374.01874
121.35 -376.26796
121.4 -378.55954
121.45 -380.89397
121.5 -383.2716
121.55 -385.69266
121.6 -388.15722
121.65 -390.66515
121.7 -393.21615
121.75 -395.80969
121.8 -398.44498
121.85 -401.121
121.9 -403.83643
121.95 -406.58965
122 -409.37876
122.05 -412.20151
122.1 -415.05536
122.15 -417.93746
122.2 -420.84464
122.25 -423.77346
122.3 -426.72023
122.35 -429.681
122.4 -432.65167
122.45 -435.62798
122.5 -438.60556
122.55 -441.58002
122.6 -444.54696
122.65 -447.50204
122.7 -450.44105
122.75 -453.3599
122.8 -456.25475
122.85 -459.12197
122.9 -461.95819
122.95 -464.76035
123 -467.5257
123.05 -470.25181
123.1 -472.93654
123.15 -475.57811
123.2 -478.17501
123.25 -480.72606
123.3 -483.23034
123.35 -485.6872
123.4 -488.09621
123.45 -490.45719
123.5 -492.77014
123.55 -495.03523
123.6 -497.25281
123.65 -499.42333
123.7 -501.54737
123.75 -503.62562
123.8 -505.65883
123.85 -507.64782
123.9 -509.59349
123.95 -511.49674
124 -513.35853
124.05 -515.17982
124.1 -516.96161
124.15 -518.70488
124.2 -520.41062
124.25 -522.07983
124.3 -523.71348
124.35 -525.31253
124.4 -526.87795
124.45 -528.41066
124.5 -529.91158
124.55 -531.38161
124.6 -532.82162
124.65 -534.23247
124.7 -535.61497
124.75 -536.96994
124.8 -538.29817
124.85 -539.60041
124.9 -540.87739
124.95 -542.12985
125 -543.35845
125.05 -544.56389
125.1 -545.74681
125.15 -546.90783
125.2 -548.04757
125.25 -549.16661
125.3 -550.26553
125.35 -551.34487
125.4 -552.40518
125.45 -553.44696
125.5 -554.47071
125.55 -555.47693
125.6 -556.46607
125.65 -557.43859
125.7 -558.39493
125.75 -559.33551
125.8 -560.26074
125.85 -561.17102
125.9 -562.06673
125.95 -562.94825
126 -563.81593
126.05 -564.67012
126.1 -565.51117
126.15 -566.3394
126.2 -567.15513
126.25 -567.95867
126.3 -568.75031
126.35 -569.53035
126.4 -570.29906
126.45 -571.05672
126.5 -571.8036
126.55 -572.53994
126.6 -573.26599
126.65 -573.98201
126.7 -574.68822
126.75 -575.38484
126.8 -576.07211
126.85 -576.75023
126.9 -577.41942
126.95 -578.07987
127 -578.73178
127.05 -579.37534
127.1 -580.01074
127.15 -580.63816
127.2 -581.25778
127.25 -581.86976
127.3 -582.47427
127.35 -583.07147
127.4 -583.66152
127.45 -584.24458
127.5 -584.82078
127.55 -585.39028
127.6 -585.95321
127.65 -586.50972
127.7 -587.05993
127.75 -587.60398
127.8 -588.14199
127.85 -588.67409
127.9 -589.20039
127.95 -589.72101
128 -590.23608
128.05 -590.74569
128.1 -591.24995
128.15 -591.74898
128.2 -592.24287
128.25 -592.73173
128.3 -593.21565
128.35 -593.69473
128.4 -594.16906
128.45 -594.63873
128.5 -595.10384
128.55 -595.56446
128.6 -596.02068
128.65 -596.47259
128.7 -596.92026
128.75 -597.36378
128.8 -597.80321
128.85 -598.23864
128.9 -598.67014
128.95 -599.09778
129 -599.52162
129.05 -599.94174
129.1 -600.35821
129.15 -600.77109
129.2 -601.18044
129.25 -601.58632
129.3 -601.9888
129.35 -602.38793
129.4 -602.78378
129.45 -603.1764
129.5 -603.56584
129.55 -603.95216
129.6 -604.33541
129.65 -604.71565
129.7 -605.09293
129.75 -605.46729
129.8 -605.83879
129.85 -606.20747
129.9 -606.57337
129.95 -606.93655
130 -607.29705
130.05 -607.65492
130.1 -608.01019
130.15 -608.3629
130.2 -608.71311
130.25 -609.06085
130.3 -609.40615
130.35 -609.74906
130.4 -610.08962
130.45 -610.42786
130.5 -610.76382
130.55 -611.09753
130.6 -611.42903
130.65 -611.75835
130.7 -612.08554
130.75 -612.41061
130.8 -612.7336
130.85 -613.05455
130.9 -613.37349
130.95 -613.69044
131 -614.00543
131.05 -614.3185
131.1 -614.62967
131.15 -614.93898
131.2 -615.24644
131.25 -615.55209
131.3 -615.85595
131.35 -616.15805
131.4 -616.45842
131.45 -616.75708
131.5 -617.05405
131.55 -617.34935
131.6 -617.64303
131.65 -617.93508
131.7 -618.22555
131.75 -618.51445
131.8 -618.8018
131.85 -619.08762
131.9 -619.37195
131.95 -619.65479
132 -619.93617
132.05 -620.2161
132.1 -620.49462
132.15 -620.77174
132.2 -621.04747
132.25 -621.32183
132.3 -621.59486
132.35 -621.86655
132.4 -622.13694
132.45 -622.40603
132.5 -622.67385
132.55 -622.94041
132.6 -623.20574
132.65 -623.46983
132.7 -623.73272
132.75 -623.99442
132.8 -624.25495
132.85 -624.51431
132.9 -624.77252
132.95 -625.02961
133 -625.28558
133.05 -625.54045
133.1 -625.79423
133.15 -626.04693
133.2 -626.29858
133.25 -626.54918
133.3 -626.79875
133.35 -627.0473
133.4 -627.29484
133.45 -627.54139
133.5 -627.78696
133.55 -628.03155
133.6 -628.27519
133.65 -628.51789
133.7 -628.75965
133.75 -629.00049
133.8 -629.24042
133.85 -629.47945
133.9 -629.71759
133.95 -629.95485
134 -630.19125
134.05 -630.42679
134.1 -630.66148
134.15 -630.89534
134.2 -631.12837
134.25 -631.36059
134.3 -631.592
134.35 -631.82262
134.4 -632.05245
134.45 -632.2815
134.5 -632.50979
134.55 -632.73731
134.6 -632.96409
134.65 -633.19013
134.7 -633.41543
134.75 -633.64001
134.8 -633.86387
134.85 -634.08703
134.9 -634.30949
134.95 -634.53125
135 -634.75234
135.05 -634.97275
135.1 -635.19249
135.15 -635.41158
135.2 -635.63001
135.25 -635.8478
135.3 -636.06495
135.35 -636.28147
135.4 -636.49737
135.45 -636.71266
135.5 -636.92734
135.55 -637.14141
135.6 -637.35489
135.65 -637.56778
135.7 -637.78009
135.75 -637.99183
135.8 -638.203
135.85 -638.4136
135.9 -638.62365
135.95 -638.83315
136 -639.04211
136.05 -639.25053
136.1 -639.45841
136.15 -639.66577
136.2 -639.87262
136.25 -640.07894
136.3 -640.28476
136.35 -640.49008
136.4 -640.69489
136.45 -640.89922
136.5 -641.10306
136.55 -641.30642
136.6 -641.5093
136.65 -641.71171
136.7 -641.91365
136.75 -642.11513
136.8 -642.31616
136.85 -642.51674
136.9 -642.71686
136.95 -642.91655
137 -643.1158
137.05 -643.31462
137.1 -643.51301
137.15 -643.71098
137.2 -643.90853
137.25 -644.10567
137.3 -644.30239
137.35 -644.49871
137.4 -644.69463
137.45 -644.89016
137.5 -645.08529
137.55 -645.28003
137.6 -645.47439
137.65 -645.66836
137.7 -645.86197
137.75 -646.05519
137.8 -646.24805
137.85 -646.44055
137.9 -646.63268
137.95 -646.82446
138 -647.01588
138.05 -647.20696
138.1 -647.39768
138.15 -647.58807
138.2 -647.77811
138.25 -647.96783
138.3 -648.1572
138.35 -648.34625
138.4 -648.53498
138.45 -648.72338
138.5 -648.91146
138.55 -649.09923
138.6 -649.28669
138.65 -649.47384
138.7 -649.66068
138.75 -649.84722
138.8 -650.03346
138.85 -650.2194
138.9 -650.40505
138.95 -650.59041
139 -650.77548
139.05 -650.96027
139.1 -651.14478
139.15 -651.32901
139.2 -651.51296
139.25 -651.69663
139.3 -651.88004
139.35 -652.06318
139.4 -652.24606
139.45 -652.42867
139.5 -652.61102
139.55 -652.79312
139.6 -652.97496
139.65 -653.15655
139.7 -653.33789
139.75 -653.51898
139.8 -653.69983
139.85 -653.88044
139.9 -654.06081
139.95 -654.24094
140 -654.42084
104.05 54.772024
104.1 54.477908
104.15 54.181493
104.2 53.882745
104.25 53.58163
104.3 53.278113
104.35 52.972158
104.4 52.663729
104.45 52.352789
104.5 52.039299
104.55 51.723223
104.6 51.404519
104.65 51.083149
104.7 50.759071
104.75 50.432243
104.8 50.102622
104.85 49.770166
104.9 49.434829
104.95 49.096567
105 48.755332
105.05 48.411079
105.1 48.063757
105.15 47.713319
105.2 47.359714
105.25 47.002889
105.3 46.642794
105.35 46.279373
105.4 45.912573
105.45 45.542337
105.5 45.168608
105.55 44.791327
105.6 44.410435
105.65 44.02587
105.7 43.63757
105.75 43.245471
105.8 42.849508
105.85 42.449615
105.9 42.045721
105.95 41.637759
106 41.225656
106.05 40.80934
106.1 40.388735
106.15 39.963765
106.2 39.534352
106.25 39.100416
106.3 38.661875
106.35 38.218644
106.4 37.770639
106.45 37.317771
106.5 36.859951
106.55 36.397085
106.6 35.92908
106.65 35.45584
106.7 34.977264
106.75 34.493253
106.8 34.003701
106.85 33.508503
106.9 33.00755
106.95 32.50073
107 31.987929
107.05 31.469028
107.1 30.943909
107.15 30.412447
107.2 29.874517
107.25 29.329989
107.3 28.77873
107.35 28.220604
107.4 27.65547
107.45 27.083186
107.5 26.503605
107.55 25.916576
107.6 25.321944
107.65 24.71955
107.7 24.109231
107.75 23.49082
107.8 22.864146
107.85 22.229031
107.9 21.585295
107.95 20.932753
108 20.271212
108.05 19.600479
108.1 18.92035
108.15 18.230619
108.2 17.531075
108.25 16.821498
108.3 16.101665
108.35 15.371345
108.4 14.630301
108.45 13.878291
108.5 13.115063
108.55 12.340361
108.6 11.553921
108.65 10.75547
108.7 9.9447293
108.75 9.1214112
108.8 8.2852202
108.85 7.4358522
108.9 6.5729944
108.95 5.6963251
109 4.8055132
109.05 3.9002182
109.1 2.9800896
109.15 2.0447669
109.2 1.093879
109.25 0.12704395
109.3 -0.85613115
109.35 -1.8560508
109.4 -2.8731312
109.45 -3.9078007
109.5 -4.9605003
109.55 -6.0316836
109.6 -7.1218174
109.65 -8.2313823
109.7 -9.3608724
109.75 -10.510796
109.8 -11.681676
109.85 -12.874051
109.9 -14.088472
109.95 -15.325509
110 -16.585743
110.05 -17.869776
110.1 -19.17822
110.15 -20.511708
110.2 -21.870885
110.25 -23.256413
110.3 -24.668968
110.35 -26.109244
110.4 -27.577944
110.45 -29.075789
110.5 -30.60351
110.55 -32.161849
110.6 -33.75156
110.65 -35.3734
110.7 -37.028135
110.75 -38.716533
110.8 -40.439358
110.85 -42.197375
110.9 -43.991335
110.95 -45.821976
111 -47.690019
111.05 -49.596155
111.1 -51.541042
111.15 -53.525296
111.2 -55.549482
111.25 -57.614102
111.3 -59.719584
111.35 -61.866271
111.4 -64.054408
111.45 -66.284126
111.5 -68.55543
111.55 -70.868182
111.6 -73.222086
111.65 -75.616672
111.7 -78.051282
111.75 -80.525055
111.8 -83.036917
111.85 -85.585563
111.9 -88.169456
111.95 -90.786817
112 -93.435622
112.05 -96.113607
112.1 -98.818269
112.15 -101.54688
112.2 -104.2965
112.25 -107.06401
112.3 -109.8461
112.35 -112.63934
112.4 -115.44019
112.45 -118.24505
112.5 -121.05027
112.55 -123.85222
112.6 -126.6473
112.65 -129.432
112.7 -132.20293
112.75 -134.95682
112.8 -137.69061
112.85 -140.4014
112.9 -143.08655
112.95 -145.74362
113 -148.37042
113.05 -150.96501
113.1 -153.5257
113.15 -156.05102
113.2 -158.53977
113.25 -160.99095
113.3 -163.4038
113.35 -165.77774
113.4 -168.1124
113.45 -170.40756
113.5 -172.66317
113.55 -174.87932
113.6 -177.05623
113.65 -179.19423
113.7 -181.29373
113.75 -183.35525
113.8 -185.37937
113.85 -187.36672
113.9 -189.318
113.95 -191.23394
114 -193.11531
114.05 -194.96289
114.1 -196.77749
114.15 -198.55994
114.2 -200.31105
114.25 -202.03167
114.3 -203.72263
114.35 -205.38476
114.4 -207.01887
114.45 -208.62578
114.5 -210.2063
114.55 -211.76122
114.6 -213.29131
114.65 -214.79734
114.7 -216.28006
114.75 -217.74021
114.8 -219.1785
114.85 -220.59565
114.9 -221.99232
114.95 -223.3692
115 -224.72695
115.05 -226.0662
115.1 -227.38757
115.15 -228.69168
115.2 -229.97912
115.25 -231.25048
115.3 -232.50631
115.35 -233.74717
115.4 -234.9736
115.45 -236.18613
115.5 -237.38527
115.55 -238.57151
115.6 -239.74536
115.65 -240.90729
115.7 -242.05777
115.75 -243.19726
115.8 -244.3262
115.85 -245.44503
115.9 -246.55419
115.95 -247.6541
116 -248.74516
116.05 -249.82778
116.1 -250.90237
116.15 -251.9693
116.2 -253.02897
116.25 -254.08175
116.3 -255.12801
116.35 -256.16812
116.4 -257.20244
116.45 -258.23131
116.5 -259.2551
116.55 -260.27415
116.6 -261.28879
116.65 -262.29938
116.7 -263.30623
116.75 -264.30968
116.8 -265.31006
116.85 -266.3077
116.9 -267.30291
116.95 -268.29602
117 -269.28735
117.05 -270.27721
117.1 -271.26592
117.15 -272.2538
117.2 -273.24115
117.25 -274.2283
117.3 -275.21556
117.35 -276.20323
117.4 -277.19164
117.45 -278.1811
117.5 -279.17192
117.55 -280.16442
117.6 -281.15892
117.65 -282.15574
117.7 -283.15519
117.75 -284.15761
117.8 -285.16332
117.85 -286.17264
117.9 -287.18591
117.95 -288.20347
118 -289.22564
118.05 -290.25279
118.1 -291.28524
118.15 -292.32336
118.2 -293.36749
118.25 -294.41801
118.3 -295.47528
118.35 -296.53966
118.4 -297.61154
118.45 -298.69131
118.5 -299.77935
118.55 -300.87607
118.6 -301.98187
118.65 -303.09717
118.7 -304.22238
118.75 -305.35795
118.8 -306.50432
118.85 -307.66193
118.9 -308.83125
118.95 -310.01274
119 -311.2069
119.05 -312.41422
119.1 -313.6352
119.15 -314.87036
119.2 -316.12024
119.25 -317.38538
119.3 -318.66635
119.35 -319.96371
119.4 -321.27806
119.45 -322.61002
119.5 -323.96019
119.55 -325.32923
119.6 -326.71779
119.65 -328.12655
119.7 -329.55621
119.75 -331.00749
119.8 -332.48112
119.85 -333.97785
119.9 -335.49848
119.95 -337.04379
120 -338.61462
120.05 -340.2118
120.1 -341.83621
120.15 -343.48873
120.2 -345.17027
120.25 -346.88176
120.3 -348.62415
120.35 -350.39842
120.4 -352.20554
120.45 -354.04653
120.5 -355.92238
120.55 -357.83413
120.6 -359.78279
120.65 -361.7694
120.7 -363.79495
120.75 -365.86047
120.8 -367.96691
120.85 -370.11523
120.9 -372.30631
120.95 -374.54101
121 -376.82009
121.05 -379.14421
121.1 -381.51394
121.15 -383.92973
121.2 -386.39186
121.25 -388.90043
121.3 -391.45536
121.35 -394.05634
121.4 -396.70281
121.45 -399.39393
121.5 -402.12857
121.55 -404.90527
121.6 -407.72224
121.65 -410.57735
121.7 -413.4681
121.75 -416.39162
121.8 -419.34471
121.85 -422.3238
121.9 -425.32504
121.95 -428.34426
122 -431.37707
122.05 -434.41887
122.1 -437.46491
122.15 -440.51037
122.2 -443.55039
122.25 -446.58017
122.3 -449.59499
122.35 -452.5903
122.4 -455.56175
122.45 -458.50526
122.5 -461.41704
122.55 -464.29362
122.6 -467.13189
122.65 -469.9291
122.7 -472.68285
122.75 -475.39112
122.8 -478.05223
122.85 -480.66486
122.9 -483.22799
122.95 -485.74089
123 -488.20314
123.05 -490.61452
123.1 -492.97508
123.15 -495.28503
123.2 -497.54476
123.25 -499.75483
123.3 -501.91591
123.35 -504.02876
123.4 -506.09424
123.45 -508.1133
123.5 -510.0869
123.55 -512.01609
123.6 -513.90192
123.65 -515.74546
123.7 -517.54779
123.75 -519.31002
123.8 -521.03322
123.85 -522.71847
123.9 -524.36684
123.95 -525.97938
124 -527.55712
124.05 -529.10106
124.1 -530.61219
124.15 -532.09147
124.2 -533.53984
124.25 -534.9582
124.3 -536.34744
124.35 -537.70843
124.4 -539.04197
124.45 -540.34889
124.5 -541.62996
124.55 -542.88593
124.6 -544.11754
124.65 -545.32548
124.7 -546.51045
124.75 -547.67309
124.8 -548.81404
124.85 -549.93392
124.9 -551.03333
124.95 -552.11283
125 -553.17299
125.05 -554.21433
125.1 -555.23738
125.15 -556.24264
125.2 -557.23058
125.25 -558.20168
125.3 -559.1564
125.35 -560.09516
125.4 -561.01839
125.45 -561.92649
125.5 -562.81988
125.55 -563.69892
125.6 -564.56398
125.65 -565.41544
125.7 -566.25362
125.75 -567.07888
125.8 -567.89152
125.85 -568.69188
125.9 -569.48025
125.95 -570.25694
126 -571.02222
126.05 -571.77637
126.1 -572.51967
126.15 -573.25238
126.2 -573.97474
126.25 -574.68701
126.3 -575.38942
126.35 -576.08221
126.4 -576.76559
126.45 -577.4398
126.5 -578.10503
126.55 -578.76149
126.6 -579.40939
126.65 -580.04892
126.7 -580.68026
126.75 -581.3036
126.8 -581.91911
126.85 -582.52698
126.9 -583.12736
126.95 -583.72042
127 -584.30632
127.05 -584.88521
127.1 -585.45725
127.15 -586.02258
127.2 -586.58134
127.25 -587.13367
127.3 -587.67971
127.35 -588.21958
127.4 -588.75342
127.45 -589.28134
127.5 -589.80348
127.55 -590.31994
127.6 -590.83085
127.65 -591.33631
127.7 -591.83643
127.75 -592.33132
127.8 -592.82109
127.85 -593.30583
127.9 -593.78564
127.95 -594.26063
128 -594.73087
128.05 -595.19647
128.1 -595.65751
128.15 -596.11409
128.2 -596.56627
128.25 -597.01416
128.3 -597.45782
128.35 -597.89734
128.4 -598.33279
128.45 -598.76426
128.5 -599.1918
128.55 -599.6155
128.6 -600.03543
128.65 -600.45164
128.7 -600.86422
128.75 -601.27322
128.8 -601.6787
128.85 -602.08074
128.9 -602.47939
128.95 -602.87471
129 -603.26676
129.05 -603.65559
129.1 -604.04127
129.15 -604.42384
129.2 -604.80336
129.25 -605.17988
129.3 -605.55346
129.35 -605.92413
129.4 -606.29196
129.45 -606.65698
129.5 -607.01925
129.55 -607.3788
129.6 -607.7357
129.65 -608.08997
129.7 -608.44166
129.75 -608.79081
129.8 -609.13747
129.85 -609.48168
129.9 -609.82347
129.95 -610.16288
130 -610.49994
130.05 -610.83471
130.1 -611.16721
130.15 -611.49748
130.2 -611.82555
130.25 -612.15146
130.3 -612.47525
130.35 -612.79693
130.4 -613.11655
130.45 -613.43414
130.5 -613.74973
130.55 -614.06335
130.6 -614.37502
130.65 -614.68478
130.7 -614.99266
130.75 -615.29868
130.8 -615.60287
130.85 -615.90527
130.9 -616.20588
130.95 -616.50475
131 -616.80189
131.05 -617.09734
131.1 -617.39111
131.15 -617.68323
131.2 -617.97372
131.25 -618.26261
131.3 -618.54993
131.35 -618.83568
131.4 -619.11989
131.45 -619.4026
131.5 -619.6838
131.55 -619.96354
131.6 -620.24182
131.65 -620.51867
131.7 -620.79411
131.75 -621.06816
131.8 -621.34083
131.85 -621.61214
131.9 -621.88212
131.95 -622.15078
132 -622.41814
132.05 -622.68422
132.1 -622.94903
132.15 -623.21259
132.2 -623.47491
132.25 -623.73602
132.3 -623.99593
132.35 -624.25465
132.4 -624.5122
132.45 -624.7686
132.5 -625.02386
132.55 -625.278
132.6 -625.53102
132.65 -625.78295
132.7 -626.0338
132.75 -626.28357
132.8 -626.5323
132.85 -626.77998
132.9 -627.02663
132.95 -627.27227
133 -627.51691
133.05 -627.76055
133.1 -628.00322
133.15 -628.24493
133.2 -628.48567
133.25 -628.72548
133.3 -628.96436
133.35 -629.20232
133.4 -629.43937
133.45 -629.67552
133.5 -629.91079
133.55 -630.14518
133.6 -630.37871
133.65 -630.61138
133.7 -630.84321
133.75 -631.07421
133.8 -631.30438
133.85 -631.53373
133.9 -631.76229
133.95 -631.99004
134 -632.21702
134.05 -632.44321
134.1 -632.66864
134.15 -632.89331
134.2 -633.11722
134.25 -633.3404
134.3 -633.56285
134.35 -633.78457
134.4 -634.00557
134.45 -634.22587
134.5 -634.44546
134.55 -634.66437
134.6 -634.88259
134.65 -635.10013
134.7 -635.31701
134.75 -635.53322
134.8 -635.74879
134.85 -635.9637
134.9 -636.17798
134.95 -636.39162
135 -636.60464
135.05 -636.81704
135.1 -637.02883
135.15 -637.24001
135.2 -637.45059
135.25 -637.66059
135.3 -637.87
135.35 -638.07883
135.4 -638.28708
135.45 -638.49478
135.5 -638.70191
135.55 -638.90848
135.6 -639.11451
135.65 -639.32
135.7 -639.52494
135.75 -639.72936
135.8 -639.93325
135.85 -640.13663
135.9 -640.33949
135.95 -640.54183
136 -640.74368
136.05 -640.94503
136.1 -641.14588
136.15 -641.34625
136.2 -641.54613
136.25 -641.74553
136.3 -641.94447
136.35 -642.14293
136.4 -642.34093
136.45 -642.53847
136.5 -642.73556
136.55 -642.9322
136.6 -643.12839
136.65 -643.32414
136.7 -643.51946
136.75 -643.71435
136.8 -643.90881
136.85 -644.10284
136.9 -644.29646
136.95 -644.48966
137 -644.68245
137.05 -644.87484
137.1 -645.06683
137.15 -645.25841
137.2 -645.4496
137.25 -645.64041
137.3 -645.83082
137.35 -646.02085
137.4 -646.21051
137.45 -646.39978
137.5 -646.58869
137.55 -646.77723
137.6 -646.9654
137.65 -647.15321
137.7 -647.34067
137.75 -647.52777
137.8 -647.71452
137.85 -647.90092
137.9 -648.08698
137.95 -648.2727
138 -648.45808
138.05 -648.64312
138.1 -648.82784
138.15 -649.01223
138.2 -649.19629
138.25 -649.38003
138.3 -649.56345
138.35 -649.74655
138.4 -649.92934
138.45 -650.11183
138.5 -650.294
138.55 -650.47587
138.6 -650.65744
138.65 -650.83871
138.7 -651.01968
138.75 -651.20036
138.8 -651.38075
138.85 -651.56085
138.9 -651.74067
138.95 -651.9202
139 -652.09946
139.05 -652.27843
139.1 -652.45713
139.15 -652.63556
139.2 -652.81372
139.25 -652.99161
139.3 -653.16923
139.35 -653.34659
139.4 -653.52369
139.45 -653.70053
139.5 -653.87712
139.55 -654.05345
139.6 -654.22953
139.65 -654.40536
139.7 -654.58094
139.75 -654.75628
139.8 -654.93137
139.85 -655.10622
139.9 -655.28084
139.95 -655.45522
140 -655.62936
Frequency / GHz SZmax(2)	Zmax(2) (a=2.57)/arg	degrees
----------------------------------------------------------------------
90 98.472716
90.05 98.377324
90.1 98.281719
90.15 98.185902
90.2 98.089871
90.25 97.993625
90.3 97.897162
90.35 97.800482
90.4 97.703584
90.45 97.606466
90.5 97.509127
90.55 97.411566
90.6 97.313782
90.65 97.215773
90.7 97.117539
90.75 97.019078
90.8 96.92039
90.85 96.821471
90.9 96.722323
90.95 96.622943
91 96.52333
91.05 96.423482
91.1 96.323399
91.15 96.22308
91.2 96.122522
91.25 96.021724
91.3 95.920686
91.35 95.819406
91.4 95.717883
91.45 95.616115
91.5 95.5141
91.55 95.411838
91.6 95.309327
91.65 95.206566
91.7 95.103553
91.75 95.000287
91.8 94.896766
91.85 94.792989
91.9 94.688955
91.95 94.584661
92 94.480107
92.05 94.375291
92.1 94.270211
92.15 94.164866
92.2 94.059255
92.25 93.953375
92.3 93.847226
92.35 93.740805
92.4 93.634111
92.45 93.527142
92.5 93.419898
92.55 93.312375
92.6 93.204573
92.65 93.096489
92.7 92.988123
92.75 92.879471
92.8 92.770534
92.85 92.661308
92.9 92.551792
92.95 92.441985
93 92.331884
93.05 92.221488
93.1 92.110795
93.15 91.999803
93.2 91.88851
93.25 91.776914
93.3 91.665014
93.35 91.552807
93.4 91.440292
93.45 91.327467
93.5 91.214329
93.55 91.100876
93.6 90.987107
93.65 90.87302
93.7 90.758613
93.75 90.643882
93.8 90.528828
93.85 90.413446
93.9 90.297736
93.95 90.181694
94 90.06532
94.05 89.94861
94.1 89.831563
94.15 89.714175
94.2 89.596446
94.25 89.478372
94.3 89.359951
94.35 89.241182
94.4 89.122061
94.45 89.002587
94.5 88.882756
94.55 88.762567
94.6 88.642016
94.65 88.521102
94.7 88.399823
94.75 88.278174
94.8 88.156155
94.85 88.033762
94.9 87.910993
94.95 87.787845
95 87.664315
95.05 87.540401
95.1 87.4161
95.15 87.29141
95.2 87.166327
95.25 87.040848
95.3 86.914972
95.35 86.788694
95.4 86.662013
95.45 86.534925
95.5 86.407427
95.55 86.279517
95.6 86.151191
95.65 86.022446
95.7 85.893279
95.75 85.763687
95.8 85.633667
95.85 85.503215
95.9 85.372329
95.95 85.241005
96 85.10924
96.05 84.977031
96.1 84.844374
96.15 84.711265
96.2 84.577702
96.25 84.443681
96.3 84.309198
96.35 84.174249
96.4 84.038832
96.45 83.902942
96.5 83.766577
96.55 83.629731
96.6 83.492401
96.65 83.354584
96.7 83.216276
96.75 83.077473
96.8 82.93817
96.85 82.798364
96.9 82.658051
96.95 82.517226
97 82.375886
97.05 82.234026
97.1 82.091643
97.15 81.948731
97.2 81.805287
97.25 81.661305
97.3 81.516783
97.35 81.371715
97.4 81.226096
97.45 81.079922
97.5 80.933189
97.55 80.785891
97.6 80.638024
97.65 80.489583
97.7 80.340564
97.75 80.19096
97.8 80.040768
97.85 79.889982
97.9 79.738596
97.95 79.586607
98 79.434008
98.05 79.280794
98.1 79.12696
98.15 78.9725
98.2 78.817409
98.25 78.661681
98.3 78.50531
98.35 78.348291
98.4 78.190618
98.45 78.032285
98.5 77.873286
98.55 77.713615
98.6 77.553265
98.65 77.392231
98.7 77.230507
98.75 77.068085
98.8 76.904959
98.85 76.741124
98.9 76.576571
98.95 76.411295
99 76.245289
99.05 76.078546
99.1 75.911058
99.15 75.742819
99.2 75.573821
99.25 75.404057
99.3 75.23352
99.35 75.062203
99.4 74.890097
99.45 74.717195
99.5 74.543489
99.55 74.368971
99.6 74.193633
99.65 74.017467
99.7 73.840466
99.75 73.662619
99.8 73.483919
99.85 73.304358
99.9 73.123926
99.95 72.942615
100 72.760415
100.05 72.577318
100.1 72.393315
100.15 72.208395
100.2 72.022549
100.25 71.835769
100.3 71.648043
100.35 71.459362
100.4 71.269716
100.45 71.079094
100.5 70.887487
100.55 70.694883
100.6 70.501272
100.65 70.306644
100.7 70.110986
100.75 69.914288
100.8 69.716538
100.85 69.517725
100.9 69.317837
100.95 69.116863
101 68.914789
101.05 68.711604
101.1 68.507296
101.15 68.301851
101.2 68.095256
101.25 67.8875
101.3 67.678568
101.35 67.468446
101.4 67.257122
101.45 67.044581
101.5 66.830809
101.55 66.615791
101.6 66.399514
101.65 66.181962
101.7 65.96312
101.75 65.742972
101.8 65.521504
101.85 65.298699
101.9 65.074541
101.95 64.849013
102 64.6221
102.05 64.393784
102.1 64.164048
102.15 63.932874
102.2 63.700245
102.25 63.466142
102.3 63.230547
102.35 62.993441
102.4 62.754805
102.45 62.51462
102.5 62.272866
102.55 62.029522
102.6 61.784569
102.65 61.537986
102.7 61.289751
102.75 61.039843
102.8 60.78824
102.85 60.534919
102.9 60.279858
102.95 60.023034
103 59.764423
103.05 59.504001
103.1 59.241744
103.15 58.977627
103.2 58.711624
103.25 58.443709
103.3 58.173857
103.35 57.902041
103.4 57.628233
103.45 57.352405
103.5 57.07453
103.55 56.794578
103.6 56.51252
103.65 56.228325
103.7 55.941964
[truncated: 55,246 more rows]
